# Supplementary material
Source: PubMed Central journal article supplement (PMC2706665)
Supplement: NIHMS86070-supplement-Supplement.pdf [file NIHMS86070-supplement-Supplement.pdf]

**TABLE S1 (BANDS 1-7): COMPLETE PEPTIDE LIST**

| Band no.   | Accession no.                        | Protein Identity                                  | Mr    | SCORE | # PEPT.  | E-value                           | Mascot                 | Additional gene copies under same match |
|------------|--------------------------------------|---------------------------------------------------|-------|-------|----------|-----------------------------------|------------------------|-----------------------------------------|
|            |                                      |                                                   |       |       |          |                                   | Sequence               |                                         |
| Band 1     | EAN87014.1                           | kinetoplastid membrane protein KMP-11             | 10876 | 46    | 1        | 8.20E-05                          | K.FAELLEQQK.N          | 3                                       |
|            | EAN84330.1                           | mucin-associated surface protein (MASP), putative | 44673 | 21    | 1        | 3.40E-02                          | K.VAISLPSR.M           | 1                                       |
| Band 2     | EAN81533.1                           | histone H4, putative                              | 11163 | 609   | 15       | 4.00E-01                          | R.GITRGSIR.R           | 10                                      |
|            |                                      |                                                   |       |       |          | 1.20E-03                          | R.GKILYGYA.-           |                                         |
|            |                                      |                                                   |       |       |          | 2.20E-03                          | K.SFVEGVVR.D           |                                         |
|            |                                      |                                                   |       |       |          | 5.00E-03                          | K.ILRENV.R             |                                         |
|            |                                      |                                                   |       |       |          | 1.20E-01                          | R.ENVRGITR.G           |                                         |
|            |                                      |                                                   |       |       |          | 1.30E-05                          | R.ISGVIYDEVR.G         |                                         |
|            |                                      |                                                   |       |       |          | 4.20E-05                          | R.DATAYTEYSR.K         |                                         |
|            |                                      |                                                   |       |       |          | 7.50E-07                          | K.TVTAVDVVNALR.K       |                                         |
|            |                                      |                                                   |       |       |          | 5.40E-04                          | R.GVIKSFVEGVVR.D       |                                         |
|            |                                      |                                                   |       |       |          | 1.80E-04                          | R.DATAYTEYSRK.K        |                                         |
|            |                                      |                                                   |       |       |          | 1.10E-02                          | K.RISGVIYDEVR.G        |                                         |
|            |                                      |                                                   |       |       |          | 5.00E-04                          | K.TVTAVDVVNALRK.R      |                                         |
|            |                                      |                                                   |       |       |          | 1.40E-07                          | K.KTVTAVDVVNALR.K      |                                         |
|            |                                      |                                                   |       |       |          | 9.10E-07                          | R.ISGVIYDEVRGVIK.S     |                                         |
|            |                                      |                                                   |       |       |          | 7.20E-05                          | K.SFVEGVVRDATAYTEYSR.K |                                         |
| EAN85055.1 | histone H4, putative                 | 11177                                             | 608   | 15    | 3.80E-06 | R.ISGIIYDEVR.G                    | 6                      |                                         |
|            |                                      |                                                   |       |       | 1.80E-03 | K.RISGIIYDEVR.G                   |                        |                                         |
|            |                                      |                                                   |       |       | 2.00E-05 | R.ISGIIYDEVRGVIK.S                |                        |                                         |
| EAN81454.1 | histone H4, putative                 | 11280                                             | 429   | 11    | 1.00E-02 | K.FVEGVVR.D                       | 1                      |                                         |
|            |                                      |                                                   |       |       | 1.70E-03 | R.GKILYGYE.-                      |                        |                                         |
|            |                                      |                                                   |       |       | 9.90E-06 | R.ISGVMYDEVR.G + Oxidation        |                        |                                         |
| EAN83533.1 | histone H2B, putative                | 12353                                             | 189   | 4     | 2.70E-02 | R.ELQTAVR.L                       | 1                      |                                         |
|            |                                      |                                                   |       |       | 1.90E-03 | R.LVLPADLAK.H                     |                        |                                         |
|            |                                      |                                                   |       |       | 2.70E-07 | R.IASEAATVVR.V                    |                        |                                         |
|            |                                      |                                                   |       |       | 2.30E-07 | K.IVNSFVNDL.FER.I                 |                        |                                         |
| EAN85330.1 | histone H2A, putative                | 14385                                             | 103   | 3     | 3.70E-03 | R.VGSLLR.R                        | 13                     |                                         |
|            |                                      |                                                   |       |       | 1.10E-02 | R.GGVMPSLNK.A + Oxidation (M)     |                        |                                         |
|            |                                      |                                                   |       |       | 3.10E-05 | K.AGLIFPVGR.V                     |                        |                                         |
| EAN98366.1 | 40S ribosomal protein S15a, putative | 14935                                             | 61    | 1     | 2.50E-06 | M.TMMSVLANALR.C + 2 Oxidation (M) | 0                      |                                         |
| EAN90233.1 | hypothetical protein, conserved      | 14887                                             | 46    | 1     | 9.50E-05 | R.RLEYETVESK.Y                    | 1                      |                                         |

| Band no.     | Accession no. | Protein Identity                               | Mr                             | SCORE | # PEPT.  | E-value            | Sequence                             | Additional copies |
|--------------|---------------|------------------------------------------------|--------------------------------|-------|----------|--------------------|--------------------------------------|-------------------|
| Band 2 cont. | EAN83566.1    | 60S ribosomal protein l36, putative            | 13040                          | 44    | 2        | 1.20E-03           | R.RVQELLR.V                          | 2                 |
|              |               |                                                |                                |       |          | 2.80E-01           | K.AIITDLVGLSPMER.R + Oxidation       |                   |
|              | EAN84604.1    | histone H3, putative                           | 21714                          | 44    | 1        | 1.40E-04           | R.STDLLLQK.A                         | 7                 |
| Band 3       | EAN83533.1    | histone H2B, putative                          | 12353                          | 532   | 12       | 9.80E-03           | R.ELQTAVR.L                          | 1                 |
|              |               |                                                |                                |       |          | 9.10E-05           | R.LVLPADLAK.H                        |                   |
|              |               |                                                |                                |       |          | 6.70E-08           | R.IASEAATVVR.V                       |                   |
|              |               |                                                |                                |       |          | 5.80E-03           | R.TWNVYISR.S                         |                   |
|              |               |                                                |                                |       |          | 1.10E-04           | K.RTWNVYISR.S                        |                   |
|              |               |                                                |                                |       |          | 6.50E-07           | K.SINNHMSMSGR.T                      |                   |
|              |               |                                                |                                |       |          | 1.30E-03           | K.SINNHMSMSGR.T + Oxidation (M)      |                   |
|              |               |                                                |                                |       |          | 2.00E-03           | R.TLGARELQTAVR.L                     |                   |
|              |               |                                                |                                |       |          | 4.00E-07           | R.IASEAATVVRVVK.K                    |                   |
|              |               |                                                |                                |       |          | 3.10E-06           | K.IVNSFVNDLFR.I                      |                   |
|              |               |                                                |                                |       |          | 4.60E-02           | K.HAMAEGTKAVSHASS.- + Oxidation (M)  |                   |
|              |               |                                                |                                |       |          | 1.60E-01           | R.SLKSINNHMSMSGR.T + Oxidation (M)   |                   |
|              |               |                                                |                                |       |          | 2.70E-02           | R.SLKSINNHMSMSGR.T + 2 Oxidation (M) |                   |
|              |               | 3.30E-07                                       | R.TMKIVNSFVNDLFR.I + Oxidation |       |          |                    |                                      |                   |
|              | EAN85055.1    | histone H4, putative                           | 11177                          | 237   | 6        | 4.60E-04           | R.GKILYGYA.-                         | 7                 |
|              |               |                                                |                                |       | 2.80E-02 | K.SFVEGVVR.D       |                                      |                   |
|              |               |                                                |                                |       | 4.10E-05 | R.ISGIIYDEV.R.G    |                                      |                   |
|              |               |                                                |                                |       | 4.00E-05 | R.DATAYTEYSR.K     |                                      |                   |
|              |               |                                                |                                |       | 4.40E-06 | K.TVTAVDVVNALR.K   |                                      |                   |
|              |               |                                                |                                |       | 7.70E-03 | R.ISGIIYDEVRGVIK.S |                                      |                   |
|              | EAN81533.1    | histone H4, putative                           | 11163                          | 209   | 5        | 1.50E-04           | R.ISGVIYDEV.R.G                      | 10                |
|              | EAN85330.1    | histone H2A, putative                          | 14385                          | 96    | 3        | 3.30E-02           | R.VGSLRR.G                           | 13                |
|              |               |                                                |                                |       |          | 9.10E-03           | R.GGVMSPLNK.A + Oxidation (M)        |                   |
|              |               |                                                |                                |       |          | 2.00E-05           | K.AGLFPVGR.V                         |                   |
|              |               |                                                |                                |       |          | 8.90E-03           | K.AGLFPVGR.V                         |                   |
|              | EAN84604.1    | histone H3, putative                           | 21714                          | 92    | 2        | 2.00E-05           | R.STDLLLQK.A                         | 7                 |
|              |               |                                                |                                |       | 4.90E-04 | R.EVSGAQKEGLR.F    |                                      |                   |
|              | EAN81492.1    | 40S ribosomal protein S14, putative            | 15771                          | 57    | 1        | 9.80E-06           | R.IEDVPTIPTDSTR.R                    | 2                 |
|              | EAN98366.1    | 40S ribosomal protein S15a, putative           | 14935                          | 54    | 1        | 1.60E-05           | M.TMMSVLANALR.C + 2 Oxidation        | 0                 |
|              | EAN85291.1    | ribosomal protein S26, putative                | 13109                          | 41    | 1        | 4.20E-04           | R.MLDQASAR.D + Oxidation (M)         | 1                 |
|              | EAN83385.1    | cytochrome c oxidase VIII (COX VIII), putative | 18658                          | 39    | 1        | 3.90E-04           | K.GSDVWAADGK.F                       | 1                 |
|              | EAN84245.1    | histone H3 variant, putative                   | 17193                          | 35    | 1        | 1.20E-01           | K.DIQLALK.L                          | 1                 |
|              |               |                                                |                                |       |          | 2.90E-02           | R.YQSSTEFLLAK.A                      |                   |
|              | EAN89722.1    | 60S ribosomal protein L34, putative            | 19668                          | 34    | 1        | 2.70E-03           | R.AFLIEEQR.I                         | 3                 |
|              | EAN83566.1    | 60S ribosomal protein l36, putative            | 13040                          | 33    | 1        | 2.00E-03           | R.RVQELLR.V                          | 2                 |

| Band no.     | Accession no.                     | Protein Identity                   | Mr     | SCORE | # PEPT.  | E-value                         | Sequence                         | Additional copies |   |
|--------------|-----------------------------------|------------------------------------|--------|-------|----------|---------------------------------|----------------------------------|-------------------|---|
| Band 3 cont. | EAN82747.1                        | Gim5A protein, putative            | 27268  | 31    | 1        | 3.20E-03                        | R.GVLNSGLTR.F                    | 3                 |   |
|              | EAN92211.1                        | hypothetical protein, conserved    | 161130 | 25    | 1        | 1.80E-02                        | R.AVVMAADAIR.T + Oxidation       | 1                 |   |
|              | EAO00223.1                        | Heat shock protein 20, putative    | 15973  | 20    | 1        | 2.80E-02                        | R.MQSVTGTSTFLSTSAR.G + Oxidation | 1                 |   |
|              | EAN84514.1                        | calpain-like cysteine peptidase, p | 15077  | 19    | 1        | 4.40E-02                        | K.VKMDAVPTEK.N + Oxidation       | 0                 |   |
| Band 4       | EAN84604.1                        | histone H3, putative               | 21714  | 412   | 12       | 2.80E-05                        | R.STDLLLQK.A                     | 7                 |   |
|              |                                   |                                    |        |       |          | 1.40E-02                        | R.EIRQFQR.S                      |                   |   |
|              |                                   |                                    |        |       |          | 3.80E-03                        | R.WRPGTVALR.E                    |                   |   |
|              |                                   |                                    |        |       |          | 1.40E-03                        | K.APKAPGAATGVK.H                 |                   |   |
|              |                                   |                                    |        |       |          | 1.90E-02                        | R.LVREVSGAQK.E                   |                   |   |
|              |                                   |                                    |        |       |          | 3.20E-03                        | K.DIHLALCLR.G                    |                   |   |
|              |                                   |                                    |        |       |          | 9.90E-06                        | R.EVSGAQKEGLR.F                  |                   |   |
|              |                                   |                                    |        |       |          | 4.80E-04                        | R.RWRPGTVALR.E                   |                   |   |
|              |                                   |                                    |        |       |          | 1.10E-03                        | K.APGAATGVKHAQR.R                |                   |   |
|              |                                   |                                    |        |       |          | 2.60E+00                        | K.DIHLALCLRGER.A                 |                   |   |
|              |                                   |                                    |        |       |          | 7.80E-04                        | R.STDLLLQKAPFQR.L                |                   |   |
|              |                                   |                                    |        |       |          | 5.70E-07                        | R.FQSSAILAAQEATESYVVSLADTNR.A    |                   |   |
|              |                                   |                                    |        |       |          | 3.70E-03                        | R.VGSLRRR.G                      |                   | 9 |
|              |                                   |                                    |        |       |          | 6.70E-03                        | R.GGVMPSLNK.A + Oxidation        |                   |   |
| 9.10E-06     | K.AGLIFPVGR.V                     |                                    |        |       |          |                                 |                                  |                   |   |
| 3.30E-07     | R.HDDDLGMLLK.D                    |                                    |        |       |          |                                 |                                  |                   |   |
| 1.10E-04     | R.HDDDLGMLLK.D + Oxidation        |                                    |        |       |          |                                 |                                  |                   |   |
| 1.80E-04     | R.SAKAGLIFPVGR.V                  |                                    |        |       |          |                                 |                                  |                   |   |
| 3.30E-03     | R.HDDDLGMLLKDVTLRSR.G             |                                    |        |       |          |                                 |                                  |                   |   |
| 2.40E-04     | R.HDDDLGMLLKDVTLRSR.G + Oxidation |                                    |        |       |          |                                 |                                  |                   |   |
| 1.20E-02     | R.TVTLAVRHDDDLGMLLK.D             |                                    |        |       |          |                                 |                                  |                   |   |
| 4.50E-02     | R.TVTLAVRHDDDLGMLLK.D + Oxidation |                                    |        |       |          |                                 |                                  |                   |   |
| EAN83533.1   | histone H2B, putative             | 12353                              | 274    | 8     | 2.80E-02 | R.ELQTAVR.L                     | 1                                |                   |   |
|              |                                   |                                    |        |       | 1.90E-03 | R.LVLPADLAK.H                   |                                  |                   |   |
|              |                                   |                                    |        |       | 6.50E-08 | R.IASEAATVVR.V                  |                                  |                   |   |
|              |                                   |                                    |        |       | 6.50E-03 | R.TWNVYISR.S                    |                                  |                   |   |
|              |                                   |                                    |        |       | 1.50E-04 | K.RTWNVYISR.S                   |                                  |                   |   |
|              |                                   |                                    |        |       | 2.00E-01 | K.SINNHMSMSGR.T                 |                                  |                   |   |
|              |                                   |                                    |        |       | 4.50E-02 | K.SINNHMSMSGR.T + Oxidation (M) |                                  |                   |   |
| EAN88264.1   | histone H2A, putative             | 14345                              | 238    | 6     | 7.10E-05 | R.HDDDLGTLK.D                   | 3                                |                   |   |
|              |                                   |                                    |        |       | 9.60E-05 | R.HDDDLGTLKDVTLRSR.G            |                                  |                   |   |

| Band no.     | Accession no.                                    | Protein Identity                       | Mr    | SCORE | # PEPT.  | E-value                       | Sequence                           | Additional copies |
|--------------|--------------------------------------------------|----------------------------------------|-------|-------|----------|-------------------------------|------------------------------------|-------------------|
| Band 4 cont. | EAN81533.1                                       | histone H4, putative <b>carry over</b> | 11163 | 197   | 5        | 1.30E-02                      | R.GKILYGYA.-                       | 10                |
|              |                                                  |                                        |       |       |          | 2.40E-02                      | K.SFVEGVVVR.D                      |                   |
|              |                                                  |                                        |       |       |          | 3.70E-05                      | R.ISGVIIYDEV.R.G                   |                   |
|              |                                                  |                                        |       |       |          | 4.00E-05                      | R.DATAYTEYSR.K                     |                   |
|              |                                                  |                                        |       |       |          | 1.40E-05                      | K.TVTAVDVVNALR.K                   |                   |
| EAN85055.1   | histone H4, putative <b>carry over</b>           | 11177                                  | 195   | 5     | 5.10E-05 | R.ISGIIYDEV.R.G               | 7                                  |                   |
| EAN94839.1   | beta tubulin, putative                           |                                        | 50520 | 186   | 4        | 1.70E-04                      | K.LAVNLVPPFR.L                     | 4                 |
|              |                                                  |                                        |       |       |          | 4.30E-06                      | R.VGEQFTAMFR.R + Oxidation (M)     |                   |
|              |                                                  |                                        |       |       |          | 7.70E-06                      | R.INVYFDEATGGR.Y                   |                   |
|              |                                                  |                                        |       |       |          | 5.90E-04                      | R.AVLIDLEPGTMDSVR.A + Oxidation    |                   |
| EAN83566.1   | 60S ribosomal protein l36, putative              |                                        | 13040 | 120   | 4        | 3.40E-04                      | R.RVQELLR.V                        | 2                 |
|              |                                                  |                                        |       |       |          | 4.20E-03                      | K.EVPKAEAPAPR.T                    |                   |
|              |                                                  |                                        |       |       |          | 3.50E-03                      | K.AIITDLVGLSPMER.R                 |                   |
|              |                                                  |                                        |       |       |          | 1.40E-05                      | K.AIITDLVGLSPMER.R + Oxidation (M) |                   |
| EAN99789.1   | 60S ribosomal protein L23, putative              |                                        | 15063 | 102   | 4        | 2.60E-01                      | K.ISSHAPAIV.-                      | 1                 |
|              |                                                  |                                        |       |       |          | 5.00E-06                      | K.VLNAVIIIR.Q                      |                   |
|              |                                                  |                                        |       |       |          | 4.00E-03                      | K.NLYIISVK.G                       |                   |
|              |                                                  |                                        |       |       |          | 1.70E-01                      | K.GEMKSGGIAGPVAK.E + Oxidation     |                   |
| EAN85296.1   | hypothetical protein, conserved                  | 11324                                  | 68    | 1     | 4.30E-07 | R.ANYASAVESR.M                | 1                                  |                   |
| EAN84514.1   | calpain-like cysteine peptidase, putative        |                                        | 15077 | 66    | 2        | 1.40E-02                      | K.MDAVPTEK.N + Oxidation           | 0                 |
|              |                                                  |                                        |       |       |          | 1.60E-04                      | R.GFDEGNLLFR.I                     |                   |
| EAN98366.1   | 40S ribosomal protein S15a, putative             | 14935                                  | 61    | 1     | 2.60E-06 | M.TMMSVLANALR.C + 2 Oxidation | 0                                  |                   |
| EAN82862.1   | ribosomal protein L24, putative                  |                                        | 14735 | 59    | 2        | 5.20E-01                      | R.FVPWTR.T                         | 3                 |
|              |                                                  |                                        |       |       |          | 2.80E-05                      | R.GIVGADLSYIQEVR.A                 |                   |
| EAN82857.1   | elongation factor 1-alpha (EF-1-alpha), putative |                                        | 48884 | 59    | 2        | 5.20E-03                      | R.QTVAVGIIK.A                      | 4                 |
|              |                                                  |                                        |       |       |          | 1.70E-03                      | K.STATGHIIYK.C                     |                   |
| EAN89019.1   | 40S ribosomal protein S16, putative              | 16930                                  | 58    | 1     | 5.20E-06 | R.GAGQVAQAYATR.Q              | 3                                  |                   |
| EAN86373.1   | vacuolar ATP synthase, putative                  | 19981                                  | 56    | 1     | 4.90E-06 | K.SGVGVVAHLGILHSER.I          | 1                                  |                   |
| EAN82747.1   | Gim5A protein, putative                          |                                        | 27268 | 54    | 2        | 2.40E+00                      | K.ALLPEDAEK.K                      | 2                 |
|              |                                                  |                                        |       |       |          | 2.60E-06                      | R.LSLLLNALSSK.T                    |                   |
| EAN81492.1   | 40S ribosomal protein S14, putative              | 15771                                  | 53    | 1     | 1.20E-05 | R.SPGPGAQAALR.A               | 2                                  |                   |
| EAN85210.1   | kinetoplast DNA-associated protein, putative     | 14529                                  | 53    | 1     | 4.10E-06 | K.NNPALSGLPVAK.R              | 1                                  |                   |
| EAN94958.1   | hypothetical protein, conserved                  |                                        | 17131 | 50    | 2        | 1.70E+00                      | K.LYSAYGPK.D                       | 1                 |
|              |                                                  |                                        |       |       |          | 6.80E-05                      | R.ALGEYYFQR.A                      |                   |
| EAN84418.1   | 60S ribosomal protein L13a, putative             | 32939                                  | 49    | 1     | 8.20E-05 | R.SPSDIFLR.T                  | 3                                  |                   |
| EAN80947.1   | tryparedoxin peroxidase, putative                | 22886                                  | 39    | 1     | 2.60E-04 | R.QITVNDLPVGR.D               | 5                                  |                   |
| EAN89722.1   | 60S ribosomal protein L34, putative              | 19668                                  | 39    | 1     | 7.40E-04 | R.AFLIEEQR.I                  | 3                                  |                   |
| EAN85291.1   | ribosomal protein S26, putative                  | 13109                                  | 38    | 1     | 8.60E-04 | R.MLDQASAR.D + Oxidation      | 1                                  |                   |

| Band no.     | Accession no.                     | Protein Identity                                                                                        | Mr    | SCORE | # PEPT.  | E-value                       | Sequence                            | Additional copies |
|--------------|-----------------------------------|---------------------------------------------------------------------------------------------------------|-------|-------|----------|-------------------------------|-------------------------------------|-------------------|
| Band 4 cont. | EAN85212.1                        | kinetoplast DNA-associated protein, putative<br>mitochondrial import inner membrane translocase subunit | 14224 | 36    | 1        | 6.30E-04                      | K.NNPALSGLPISER.G                   | 1                 |
|              | EAN96914.1                        | Tim17, putative                                                                                         | 16142 | 28    | 1        | 5.10E-03                      | R.IIDALGFAQH.-                      | 1                 |
|              | EAN91849.1                        | small nuclear ribonucleoprotein Sm-F, putative                                                          | 8736  | 21    | 1        | 3.90E-02                      | R.CNNVLYIRE                         | 1                 |
| Band 5       | EAN90899.1                        | ribosomal protein L21E (60S), putative                                                                  | 18271 | 346   | 8        | 4.80E-04                      | K.RVEVLAR.R                         | 0                 |
|              |                                   |                                                                                                         |       |       |          | 1.20E-04                      | K.DFLAFQAAK.K                       |                   |
|              |                                   |                                                                                                         |       |       |          | 7.60E-07                      | R.GVGVIVNKPVR.N                     |                   |
|              |                                   |                                                                                                         |       |       |          | 2.30E-04                      | R.TGIVWNVTPR.G                      |                   |
|              |                                   |                                                                                                         |       |       |          | 4.20E-04                      | R.AAEYEAMIPY.- + Oxidation (M)      |                   |
|              |                                   |                                                                                                         |       |       |          | 1.80E-02                      | K.QKDFLAFQAAK.K                     |                   |
|              |                                   |                                                                                                         |       |       |          | 7.60E-03                      | R.RAAEYEAMIPY.- + Oxidation (M)     |                   |
|              | 1.90E-08                          | K.VGDYVDVVADSAVR.A                                                                                      |       |       |          |                               |                                     |                   |
|              | EAN82549.1                        | ribosomal protein L21E (60S), putative                                                                  | 18285 | 336   | 8        | 3.60E-03                      | K.RVELLAR.R                         | 0                 |
|              | EAN94839.1                        | beta tubulin, putative                                                                                  | 50520 | 311   | 8        | 5.70E-02                      | R.YLTASALFR.G                       | 0                 |
|              |                                   |                                                                                                         |       |       |          | 2.00E-05                      | K.LAVNLVPPRL                        |                   |
|              |                                   |                                                                                                         |       |       |          | 3.00E-06                      | R.VGEQFTAMFR.R + Oxidation (M)      |                   |
|              |                                   |                                                                                                         |       |       |          | 3.40E-05                      | R.INVYFDEATGGR.Y                    |                   |
|              |                                   |                                                                                                         |       |       |          | 2.60E-01                      | K.EVDEQMLNVQNK.N                    |                   |
|              |                                   |                                                                                                         |       |       |          | 6.70E-05                      | K.EVDEQMLNVQNK.N + Oxidation (M)    |                   |
|              |                                   |                                                                                                         |       |       |          | 9.90E-05                      | R.AVLIDLEPGTMDSVR.A + Oxidation (M) |                   |
|              | 1.30E-05                          | K.NSSYFIEWIPNNIK.S                                                                                      |       |       |          |                               |                                     |                   |
| EAN83533.1   | histone H2B, putative             | 12353                                                                                                   | 175   | 4     | 2.80E-02 | R.ELQTAVR.L                   | 1                                   |                   |
|              |                                   |                                                                                                         |       |       | 2.50E-03 | R.LVLPADLAK.H                 |                                     |                   |
|              |                                   |                                                                                                         |       |       | 6.00E-07 | R.IASEAATVVR.V                |                                     |                   |
|              |                                   |                                                                                                         |       |       | 1.80E-06 | K.IVNSFVNDLFR.I               |                                     |                   |
| EAN84275.1   | succinate dehydrogenase, putative | 21862                                                                                                   | 169   | 6     | 1.00E-01 | R.VPPPLDAK.I                  | 0                                   |                   |
|              |                                   |                                                                                                         |       |       | 7.60E-04 | R.MSSPVTPR.V + Oxidation (M)  |                                     |                   |
|              |                                   |                                                                                                         |       |       | 1.40E-01 | K.FLNPAYASK.E                 |                                     |                   |
|              |                                   |                                                                                                         |       |       | 7.90E-06 | M.PSAPLTGEVAR.Y               |                                     |                   |
|              |                                   |                                                                                                         |       |       | 3.40E-03 | R.YSSPLFMYR.R + Oxidation (M) |                                     |                   |
|              |                                   |                                                                                                         |       |       | 6.90E-02 | K.NAAPKPETVFTAK.D             |                                     |                   |
| EAN85055.1   | histone H4, putative              | 11177                                                                                                   | 166   | 4     | 3.00E-02 | K.SFVEGVVR.D                  | 7                                   |                   |
|              |                                   |                                                                                                         |       |       | 9.20E-05 | R.ISGHIYDEVR.G                |                                     |                   |
|              |                                   |                                                                                                         |       |       | 4.10E-05 | R.DATAYTEYSR.K                |                                     |                   |
|              |                                   |                                                                                                         |       |       | 2.90E-05 | K.TVTAVDVVNALR.K              |                                     |                   |
|              |                                   |                                                                                                         |       |       |          |                               |                                     |                   |

| Band no.     | Accession no.                       | Protein Identity                                              | Mr    | SCORE | # PEPT.  | E-value       | Sequence                            | Additional copies |
|--------------|-------------------------------------|---------------------------------------------------------------|-------|-------|----------|---------------|-------------------------------------|-------------------|
| Band 5 cont. | EAN83814.1                          | COP-coated vesicle membrane protein gp25L precursor, putative | 36993 | 162   | 5        | 2.70E-02      | R.VLEDAVR.S                         | 1                 |
|              |                                     |                                                               |       |       |          | 5.30E-02      | R.NANEAMTFK.V + Oxidation (M)       |                   |
|              |                                     |                                                               |       |       |          | 2.10E-03      | K.LRPIEVELR.V                       |                   |
|              |                                     |                                                               |       |       |          | 9.90E-10      | R.VGSENNDYSELATK.E                  |                   |
|              |                                     |                                                               |       |       |          | 1.10E+00      | R.SIHSEYLYYKEK.E                    |                   |
| EAN81533.1   | histone H4, putative                | 11163                                                         | 160   | 4     | 4.30E-04 | R.ISGVYDEVR.G | 10                                  |                   |
| EAN83023.1   | 60S ribosomal protein L17, putative |                                                               | 19386 | 155   | 5        | 3.00E-03      | K.NAEANAIEK.G                       | 3                 |
|              |                                     |                                                               |       |       |          | 8.70E-04      | K.HVQVDQAAR.M                       |                   |
|              |                                     |                                                               |       |       |          | 5.00E-03      | K.SVVAMLSLLK.N + Oxidation (M)      |                   |
|              |                                     |                                                               |       |       |          | 7.00E-01      | K.GLDPNKMVIK.H + Oxidation (M)      |                   |
|              |                                     |                                                               |       |       |          | 8.20E-06      | K.NTFETANVINGMPLR.K + Oxidation     |                   |
| EAN92891.1   | 40S ribosomal protein S17, putative |                                                               | 23047 | 145   | 3        | 1.20E-01      | R.METGVPR.H + Oxidation             | 1                 |
|              |                                     |                                                               |       |       |          | 1.10E-05      | R.VVMMDVTIAR.S + Oxidation          |                   |
|              |                                     |                                                               |       |       |          | 1.70E-08      | R.HVALTTVVAPVTK.K                   |                   |
| EAN88197.1   | ribosomal protein S19, putative     |                                                               | 19134 | 138   | 4        | 7.80E-05      | K.LADAIAFK.V                        | 1                 |
|              |                                     |                                                               |       |       |          | 1.60E-04      | R.KLADAIAFK.V                       |                   |
|              |                                     |                                                               |       |       |          | 1.20E-02      | R.GSRPEITVR.A                       |                   |
|              |                                     |                                                               |       |       |          | 5.70E-03      | R.AVYMRPGVGYGGLSK.R + Oxidation     |                   |
| EAN82577.1   | ADP-ribosylation factor 1, putative |                                                               | 20806 | 136   | 4        | 4.40E-03      | K.MFTEDELN.N + Oxidation (M)        | 3                 |
|              |                                     |                                                               |       |       |          | 3.60E-04      | R.ILMVGLDAAGK.T                     |                   |
|              |                                     |                                                               |       |       |          | 2.70E-06      | R.ILMVGLDAAGK.T + Oxidation (M)     |                   |
|              |                                     |                                                               |       |       |          | 1.40E-05      | K.QDLPNAMSTTEVTEK.L + Oxidation (M) |                   |
| EAN81803.1   | 60S ribosomal protein L11, putative |                                                               | 22600 | 119   | 3        | 3.30E-02      | K.VKEFELK.S                         | 0                 |
|              |                                     |                                                               |       |       |          | 5.60E-05      | K.KAEELLEK.G                        |                   |
|              |                                     |                                                               |       |       |          | 1.90E-05      | R.TYDGIHFQAK.K                      |                   |
| EAN99605.1   | hypothetical protein, conserved     |                                                               | 19732 | 115   | 5        | 2.40E-01      | R.ALMEQER.C + Oxidation (M)         | 0                 |
|              |                                     |                                                               |       |       |          | 2.30E-03      | R.IIEENLR.I                         |                   |
|              |                                     |                                                               |       |       |          | 2.20E-03      | R.YTYEPMGSR.R + Oxidation (M)       |                   |
|              |                                     |                                                               |       |       |          | 3.10E-03      | R.LQNEEYIAR.L                       |                   |
|              |                                     |                                                               |       |       |          | 1.40E-01      | R.IVHNMTIIMKR.G + 2 Oxidation       |                   |
| EAN81053.1   | alpha tubulin, putative             |                                                               | 50549 | 112   | 3        | 1.10E-02      | R.LSVDYGKK.S                        | 0                 |
|              |                                     |                                                               |       |       |          | 3.30E-04      | K.DVNAAVATIK.T                      |                   |
|              |                                     |                                                               |       |       |          | 4.20E-05      | R.AVFLDLEPTVVDEIR.T                 |                   |
| EAN89208.1   | 60S ribosomal protein L35, putative |                                                               | 15310 | 109   | 4        | 7.40E-01      | R.ILTVLNR.N                         | 2                 |
|              |                                     |                                                               |       |       |          | 5.50E-04      | R.LALKDNEK.N                        |                   |
|              |                                     |                                                               |       |       |          | 2.80E+00      | K.QLMEFKK.E + Oxidation (M)         |                   |
|              |                                     |                                                               |       |       |          | 4.20E-06      | R.VAQQQLNSAGTR.L                    |                   |

| Band no.     | Accession no.                            | Protein Identity                          | Mr    | SCORE | # PEPT.                                                  | E-value                                                                           | Sequence                                            | Additional copies |
|--------------|------------------------------------------|-------------------------------------------|-------|-------|----------------------------------------------------------|-----------------------------------------------------------------------------------|-----------------------------------------------------|-------------------|
| Band 5 cont. | EAN90616.1                               | glycosomal malate dehydrogenase, putative | 34347 | 107   | 2                                                        | 1.50E-03<br>1.60E-07                                                              | R.VQVAGTEVVK.A<br>R.GSATLSMAEAGAR.F + Oxidation     | 1                 |
|              | EAN96121.1                               | RNA-binding protein, putative             | 17759 | 106   | 3                                                        | 2.00E-04<br>4.50E-02<br>6.60E-05                                                  | R.VYVGNIDKR.A<br>K.TIEDSWLAR.R<br>R.VLVVETSTTTLPK.E | 0                 |
| EAN80947.1   | tryparedoxin peroxidase, putative        | 22886                                     | 103   | 3     | 6.60E-03<br>1.40E-03<br>3.80E-05                         | K.AFQFVEK.H<br>R.GLFIIDPK.Q<br>R.QITVNDLPVGR.D                                    | 3                                                   |                   |
| EAN99961.1   | ribosomal protein L35A, putative         | 17023                                     | 96    | 5     | 2.50E-01<br>1.30E-04<br>3.90E-01<br>4.00E-03<br>2.90E+00 | R.IENVNTK.E<br>K.AVLAGYTR.G<br>R.VYLYPSR.I<br>R.VYLYPSR.I-<br>R.KFHGSLAANR.S      | 0                                                   |                   |
| EAN87953.1   | ribosomal protein L27, putative          | 15503                                     | 87    | 3     | 2.60E-03<br>7.60E-02<br>9.00E-04                         | K.VVIVTSGR.Y<br>R.INVSDASK.K<br>K.AVIVQNTDSK.S                                    | 2                                                   |                   |
| EAN98360.1   | 60S ribosomal protein L28, putative      | 16372                                     | 79    | 1     | 5.30E-08                                                 | K.AVMDAGVEASVSK.A + Oxidation                                                     | 2                                                   |                   |
| EAN87059.1   | hypothetical protein, conserved          | 21263                                     | 77    | 3     | 3.40E-03<br>2.10E-01<br>6.70E-04                         | K.KAAALYVR.F<br>R.FYHALKK.S<br>K.SVGLTAALSPK.Q                                    | 0                                                   |                   |
| EAN90740.1   | vacuolar transporter chaperone, putative | 20216                                     | 75    | 3     | 1.50E-01<br>3.70E-04<br>1.50E-02                         | K.TFFANER.T<br>K.YMNLQPGVR.N + Oxidation (M)<br>K.AMTPTIHGGAIFS.- + Oxidation (M) | 0                                                   |                   |
| EAN89163.1   | hypothetical protein, conserved          | 25313                                     | 74    | 3     | 1.90E-03<br>3.30E-02<br>4.30E-02                         | R.RLNEGGLR.F<br>R.LRDLYER.N<br>R.SGRDDIAAPR.R                                     | 1                                                   |                   |
| EAN82199.1   | hypothetical protein, conserved          | 23072                                     | 72    | 2     | 5.30E-04<br>3.70E-03                                     | R.GVSVVTR.E<br>R.AYSNVIR.E                                                        | 1                                                   |                   |
| EAN89722.1   | 60S ribosomal protein L34, putative      | 19668                                     | 71    | 3     | 4.10E-03<br>2.80E-04                                     | R.AFLIEQR.I<br>K.STSRPYGGVLSHEQVR.D                                               | 3                                                   |                   |
| EAN87271.1   | glycosomal membrane protein, putative    | 24137                                     | 70    | 2     | 4.80E-05<br>1.50E-02                                     | K.SVSSSITDGR.S<br>R.YKLVPGQPK.R                                                   | 1                                                   |                   |
| EAN85214.1   | hypothetical protein, conserved          | 21287                                     | 68    | 3     | 4.30E-01<br>4.60E-03                                     | R.FYYALKK.S<br>K.SVGLTAALSPR.Q                                                    | 0                                                   |                   |
| EAN99158.1   | hypothetical protein, conserved          | 17771                                     | 67    | 2     | 2.60E-03<br>1.00E-03                                     | R.LGIGFDDR.R<br>R.NALDLGDDR.D                                                     | 0                                                   |                   |
| EAN98186.1   | 40S ribosomal protein S18, putative      | 17679                                     | 62    | 2     | 1.50E-03<br>8.70E-03                                     | R.LLNTNVEGK.R<br>K.TGKTEHLTSAMVDTR.L + Oxidation                                  | 1                                                   |                   |

| Band no.     | Accession no.                       | Protein Identity                                               | Mr                                  | SCORE | # PEPT. | E-value              | Sequence                                     | Additional copies |   |
|--------------|-------------------------------------|----------------------------------------------------------------|-------------------------------------|-------|---------|----------------------|----------------------------------------------|-------------------|---|
| Band 5 cont. | EAN87824.1                          | hypothetical protein, conserved                                | 29236                               | 61    | 2       | 3.80E-03<br>7.10E-04 | K.VIANLLNR.-<br>K.IINLSAEEIR.A               | 1                 |   |
|              | EAN81251.1                          | 40S ribosomal protein S8, putative                             | 30143                               | 60    | 1       | 3.80E-06             | K.AVADQLKEGR.L                               | 2                 |   |
|              | EAN95668.1                          | hypothetical protein, conserved                                | 17874                               | 49    | 2       | 6.40E-02             | R.LGLDFDARR.G                                | 0                 |   |
|              | EAN82857.1                          | elongation factor 1-alpha (EF-1-alpha), putative               | 48884                               | 49    | 2       | 2.20E-02<br>1.10E-02 | K.SVNFAQER.Y<br>K.STATGHLYK.C                | 6                 |   |
|              | EAN97136.1                          | ATP synthase, epsilon chain, putative                          | 20447                               | 47    | 1       | 6.50E-05             | K.ALAAQQASLGSAAK.D                           | 0                 |   |
|              | EAN83270.1                          | hypothetical protein, conserved                                | 25371                               | 46    | 2       | 1.40E-01<br>1.10E-03 | R.EVVPPQSR.V<br>R.ATVEESSER.L                | 0                 |   |
|              | EAN86269.1                          | 60S ribosomal protein L19, putative                            | 37755                               | 42    | 1       | 2.80E-04             | R.QLAEQLAAK.R                                | 3                 |   |
|              | EAN91609.1                          | vacuolar-type proton translocating pyrophosphatase 1, putative | 86135                               | 41    | 1       | 7.90E-05             | R.VGIPTINILDAR.V                             | 1                 |   |
|              | EAN82898.1                          | hypothetical protein, conserved                                | 23348                               | 41    | 1       | 1.50E-04             | R.EVEEYDAAVER.V                              | 2                 |   |
|              | EAO00224.1                          | 60S ribosomal protein L13, putative                            | 25420                               | 40    | 1       | 4.00E-04             | R.FAPTIGIR.V                                 | 2                 |   |
|              | EAN82879.1                          | 40S ribosomal protein S11, putative                            | 20229                               | 40    | 1       | 2.30E-04             | R.YNVLEVVS.K                                 | 3                 |   |
|              | EAN82694.1                          | 40S ribosomal protein S13, putative                            | 17431                               | 37    | 1       | 9.10E-04             | R.DSMGIAQVK.N + Oxidation                    | 3                 |   |
|              | EAN92417.1                          | signal peptidase type I, putative                              | 22932                               | 36    | 2       | 6.30E-01<br>6.60E-04 | R.TVPIVHR.V<br>R.LMELQFSQMGR.I + 2 Oxidation | 1                 |   |
|              | EAN86445.1                          | hypothetical protein, conserved                                | 22586                               | 36    | 1       | 8.90E-04             | R.ILYNTTNVDR.T                               | 1                 |   |
|              | EAN98272.1                          | eukaryotic initiation factor 4a, putative                      | 49984                               | 31    | 1       | 1.20E-03             | R.VLVTTDLVAR.G                               | 1                 |   |
|              | EAN89019.1                          | 40S ribosomal protein S16, putative                            | 16930                               | 29    | 1       | 7.80E-03             | K.IMEAVNVVGSR.Q + Oxidation                  | 3                 |   |
|              | EAN93852.1                          | reticulon domain protein, p                                    | 21286                               | 25    | 1       | 5.90E-03             | R.LVTALESMLVLTWR.D + Oxidation               | 0                 |   |
|              | EAN87937.1                          | hypothetical protein, conserved                                | 21881                               | 18    | 1       | 7.80E-02             | K.STAAFTPTGPK.R                              | 1                 |   |
|              | Band 6                              | EAN82805.1                                                     | 40S ribosomal protein L14, putative | 20789 | 277     | 8                    | 0.006                                        | K.FSVELSR.N       | 2 |
|              |                                     |                                                                |                                     |       |         |                      | 0.00034                                      | M.VKANYIR.A       |   |
| 0.059        |                                     |                                                                |                                     |       |         |                      | R.VLVENPADK.K                                |                   |   |
| 4.1e-005     |                                     |                                                                |                                     |       |         |                      | R.KVFDENDK.K                                 |                   |   |
| 0.00011      |                                     |                                                                |                                     |       |         |                      | R.TLKNVLAEK.K                                |                   |   |
| 7.6e-005     |                                     |                                                                |                                     |       |         |                      | R.VLVENPADKK.M                               |                   |   |
| 8.2e-006     |                                     |                                                                |                                     |       |         |                      | R.VGVVVDIIDGNR.V                             |                   |   |
| 0.13         |                                     |                                                                |                                     |       |         |                      | R.STDFERYQLR.V                               |                   |   |
| 1.50E-01     |                                     |                                                                |                                     |       |         |                      | R.YLTASALFR.G                                |                   |   |
| 2.70E-02     |                                     |                                                                |                                     |       |         |                      | K.NMMQAADPR.H + 2 Oxidation (M)              |                   |   |
| 2.00E-02     |                                     | K.LAVNLVPFPR.L                                                 |                                     |       |         |                      |                                              |                   |   |
| 1.50E-06     | R.VGEQFTAMFR.R + Oxidation (M)      |                                                                |                                     |       |         |                      |                                              |                   |   |
| 7.20E-05     | K.EVDEQMLNVQNK.N + Oxidation (M)    |                                                                |                                     |       |         |                      |                                              |                   |   |
| 6.80E-04     | R.AVLIDLEPGTMDSVR.A + Oxidation (M) |                                                                |                                     |       |         |                      |                                              |                   |   |
| 1.40E-04     | R.GLSVPELTQQMFAK.N + Oxidation (M)  |                                                                |                                     |       |         |                      |                                              |                   |   |



| Band no.                 | Accession no. | Protein Identity                      | Mr    | SCORE | # PEPT. | E-value  | Sequence                        | Additional copies |
|--------------------------|---------------|---------------------------------------|-------|-------|---------|----------|---------------------------------|-------------------|
| Band 6 cont.             | EAN80947.1    | tryparedoxin peroxidase, putative     | 22886 | 217   | 6       | 7.10E-03 | R.DVDEALR.L                     | 3                 |
|                          |               |                                       |       |       |         | 1.00E-03 | K.AFQFVEK.H                     |                   |
|                          |               |                                       |       |       |         | 1.70E-05 | R.GLFIIDPK.Q                    |                   |
|                          |               |                                       |       |       |         | 8.90E-04 | K.SKEYFGAVA.-                   |                   |
|                          |               |                                       |       |       |         | 1.40E-04 | R.QITVNDLPVGR.D                 |                   |
|                          |               |                                       |       |       |         | 1.80E-03 | K.SYGVLKEEDGVAYR.G              |                   |
| <input type="checkbox"/> | EAN87271.1    | glycosomal membrane protein, putative | 24137 | 213   | 6       | 5.10E-03 | K.LLGQTDGR.D                    | 1                 |
|                          |               |                                       |       |       |         | 9.20E-04 | K.SALINLTK.D                    |                   |
|                          |               |                                       |       |       |         | 1.30E-01 | K.WMGDIPK.M + Oxidation (M)     |                   |
|                          |               |                                       |       |       |         | 1.30E-04 | K.SVSSSITDGR.S                  |                   |
|                          |               |                                       |       |       |         | 1.50E-03 | R.YKLVPGQPK.R                   |                   |
|                          |               |                                       |       |       |         | 4.40E-06 | R.SAYKSVSSSITDGR.S              |                   |
|                          | EAN89424.1    | hypothetical protein, conserved       | 23550 | 166   | 8       | 3.40E-01 | K.DEYEV.R                       | 1                 |
|                          |               |                                       |       |       |         | 4.20E-03 | R.FNEIVKR.Y                     |                   |
|                          |               |                                       |       |       |         | 8.80E-01 | R.LTSYMTSK.K + Oxidation (M)    |                   |
|                          |               |                                       |       |       |         | 6.00E-03 | K.VYYPLRR.H                     |                   |
|                          |               |                                       |       |       |         | 3.10E-01 | K.FVYKEMGK.V + Oxidation (M)    |                   |
|                          |               |                                       |       |       |         | 1.50E-02 | K.HIQDLWTR.V                    |                   |
|                          |               |                                       |       |       |         | 2.40E-02 | R.RLTSYMTSK.K                   |                   |
|                          |               |                                       |       |       |         | 3.20E-04 | R.YGQAPQYAEVK.-                 |                   |
|                          | EAN87517.1    | 40S ribosomal protein S9, putative    | 22333 | 147   | 7       | 8.10E-03 | R.VNMTLSK.M + Oxidation (M)     | 2                 |
|                          |               |                                       |       |       |         | 8.50E-02 | K.LCGQYGLR.C                    |                   |
|                          |               |                                       |       |       |         | 4.80E-02 | R.RLQTVVFK.H                    |                   |
|                          |               |                                       |       |       |         | 5.20E-03 | R.QLEGS AIMR.R + Oxidation (M)  |                   |
|                          |               |                                       |       |       |         | 6.60E-01 | R.RQLEGS AIMR.R + Oxidation (M) |                   |
|                          |               |                                       |       |       |         | 2.00E-02 | K.QIVTIPSFIVR.V                 |                   |
|                          |               |                                       |       |       |         | 1.80E-04 | R.LLLTLPENHPR.R                 |                   |
|                          | EAN85226.1    | histone H2A, putative                 | 18753 | 137   | 3       | 1.50E-03 | R.GGVVPFVHK.S                   | 0                 |
|                          |               |                                       |       |       |         | 1.70E-05 | R.ADLNFPVGR.I                   |                   |
|                          |               |                                       |       |       |         | 5.50E-06 | R.GDEELNQIVNATIAR.G             |                   |
|                          | EAN81803.1    | 60S ribosomal protein L11, putative   | 22600 | 136   | 5       | 3.60E-03 | K.AEELLEK.G                     | 0                 |
|                          |               |                                       |       |       |         | 1.30E-02 | K.VKEFELK.S                     |                   |
|                          |               |                                       |       |       |         | 8.00E-05 | K.KAEELLEK.G                    |                   |
|                          |               |                                       |       |       |         | 3.10E-02 | R.TYDGIIFQAK.K                  |                   |
|                          |               |                                       |       |       |         | 9.80E-02 | K.ATNPMREIVVK.K + Oxidation (M) |                   |
|                          | EAN83533.1    | histone H2B, putative                 | 12353 | 136   | 3       | 1.50E-03 | R.LVLPADLAK.H                   | 1                 |
|                          |               |                                       |       |       |         | 1.40E-05 | R.IASEAATVVR.V                  |                   |
|                          |               |                                       |       |       |         | 1.70E-06 | K.IVNSFVNDL FER.I               |                   |

| Band no.     | Accession no. | Protein Identity                             | Mr    | SCORE | # PEPT. | E-value                                                  | Sequence                                                                                                   | Additional copies |
|--------------|---------------|----------------------------------------------|-------|-------|---------|----------------------------------------------------------|------------------------------------------------------------------------------------------------------------|-------------------|
| Band 6 cont. | EAN97975.1    | 60S ribosomal protein L18, putative          | 21876 | 118   | 4       | 6.30E-04<br>2.10E-02<br>1.60E-03<br>3.70E-02             | M.GVDLTGVQK.K<br>M.GVDLTGVQKK.K<br>R.SNRAPISLSR.I<br>R.HHTYSTNPYIK.L                                       | 0                 |
|              | EAN84950.1    | kinetoplast DNA-associated protein, putative | 21340 | 116   | 5       | 9.70E-03<br>2.90E-01<br>1.30E-02<br>1.10E-03<br>6.10E-02 | R.EEAASLAR.S<br>K.FVRENYHK.V<br>K.QREEAASLAR.S<br>K.MYKELSQNQR.R + Oxidation (M)<br>R.FGALSQLYDVSKPLDVEK.E | 1                 |
|              | EAN86177.1    | 60S ribosomal subunit protein L31, putative  | 21575 | 88    | 2       | 2.60E-04<br>7.40E-05                                     | R.KQALLDAR.K<br>R.KPDNITMEATHLSK.L + Oxidation (M)                                                         | 3                 |
|              | EAN83877.1    | ribosomal protein S7, putative               | 24970 | 77    | 3       | 1.30E-01<br>6.30E-04<br>3.10E-03                         | R.FHINTVR.T<br>R.TATVVVFYPLR.F<br>K.RPNSEDEDSVAK.A                                                         | 3                 |
|              | EAN81053.1    | alpha tubulin, putative                      | 50549 | 72    | 4       | 3.10E-01<br>1.20E-01<br>2.80E-01<br>2.40E-04             | R.LSVDYGGK.S<br>R.IDHKFDLMYSK.R + Oxidation (M)<br>R.TIQFVDWSPGFK.C<br>R.AVFLDLEPTVVDEIR.T                 | 0                 |
|              | EAN82879.1    | 40S ribosomal protein S11, putative          | 20229 | 71    | 2       | 2.40E-02<br>2.60E-05                                     | R.DYLFHFR.K<br>R.YNVLEVVS.K.S                                                                              | 3                 |
|              | EAN84629.1    | hypothetical protein, conserved              | 20294 | 59    | 2       | 2.40E-02<br>3.60E-04                                     | K.FASTATSLR.S<br>R.GQVRPVQLASGEGK.K                                                                        | 0                 |
|              | EAN82747.1    | Gim5A protein, putative                      | 27268 | 51    | 1       | 5.10E-06                                                 | R.LSLLLNALSSK.T                                                                                            | 2                 |
|              | EAN87059.1    | hypothetical protein, conserved              | 21263 | 49    | 3       | 2.20E-03<br>1.10E-02<br>1.20E+00                         | K.KAAALYVR.F<br>R.FYHALKK.S<br>K.TVTSTVPPLP.-                                                              | 0                 |
|              | EAN90235.1    | hypothetical protein, conserved              | 24533 | 48    | 2       | 1.90E-01<br>4.40E-04                                     | K.YIYEPK.S<br>R.EFLSVQNAHK.V                                                                               | 1                 |
|              | EAN86445.1    | hypothetical protein, conserved              | 22586 | 46    | 1       | 1.00E-04                                                 | R.ILYNTTNVDR.T                                                                                             | 1                 |
|              | EAN81438.1    | ADP-ribosylation factor, putative            | 18405 | 45    | 1       | 7.10E-05                                                 | R.TPFILGNK.I                                                                                               | 1                 |
|              | EAN86269.1    | 60S ribosomal protein L19, putative          | 37755 | 43    | 1       | 2.30E-04                                                 | R.QLAEQLAAK.R                                                                                              | 3                 |
|              | EAN91922.1    | hypothetical protein, conserved              | 23735 | 42    | 2       | 6.00E-03<br>3.80E-02                                     | R.YDAMSVR.R + Oxidation (M)<br>R.GGFTSPSFLR.A                                                              | 0                 |
|              | EAN97577.1    | hypothetical protein, conserved              | 56966 | 39    | 1       | 4.90E-04                                                 | R.LQQLEEAAR.R                                                                                              | 0                 |
|              | EAN93193.1    | 60S ribosomal protein L18a, putative         | 20978 | 37    | 2       | 1.50E+00<br>7.40E-04                                     | K.SIPNHQVK.R<br>K.AGAVSQAYHDLASR.H                                                                         | 2                 |
|              | EAN89163.1    | hypothetical protein, conserved              | 25313 | 35    | 1       | 1.30E-03                                                 | R.RLNEGGLR.F                                                                                               | 1                 |
|              | EAN83023.1    | 60S ribosomal protein L17, putative          | 19386 | 33    | 1       | 2.00E-03                                                 | K.HVQVDQAAR.M                                                                                              | 3                 |

| Band no.     | Accession no.                           | Protein Identity                                        | Mr    | SCORE | # PEPT.  | E-value                          | Sequence                          | Additional copies |
|--------------|-----------------------------------------|---------------------------------------------------------|-------|-------|----------|----------------------------------|-----------------------------------|-------------------|
| Band 6 cont. | EAN82173.1                              | hypothetical protein, conserved                         | 23907 | 33    | 1        | 1.40E-03                         | R.SSLADYVLR.A                     | 1                 |
|              | EAN82317.1                              | glutamamyl carboxypeptidase, putative                   | 44248 | 33    | 1        | 1.30E-03                         | K.LVAFDITSR.N                     | 5                 |
|              | EAN85542.1                              | COP-coated vesicle membrane protein p24 precursor, puta | 25156 | 30    | 1        | 4.60E-03                         | R.ATTEVANTR.V                     | 1                 |
|              | EAN85405.1                              | hypothetical protein, conserved                         | 98633 | 22    | 1        | 4.30E-02                         | R.ELEDLSAK.K                      | 1                 |
|              | EAN90473.1                              | hypothetical protein, conserved                         | 22542 | 20    | 1        | 3.90E-03                         | R.QNILLPR.S                       | 1                 |
|              | EAN99961.1                              | ribosomal protein L35A, putative                        | 17023 | 20    | 1        | 2.40E-02                         | R.VYLYPSRI.-                      | 0                 |
|              | EAN84470.1                              | 60S ribosomal protein L26, putative                     | 16431 | 20    | 1        | 2.30E-02                         | R.ILMSAPLSK.E + Oxidation (M)     | 2                 |
|              | EAN89722.1                              | 60S ribosomal protein L34, putative                     | 19668 | 20    | 1        | 2.30E-02                         | K.AASRVVPGAK.V                    | 3                 |
| Band 7       | EAN87845.1                              | 40S ribosomal protein S4, putative                      | 30998 | 658   | 17       | 0.00016                          | K.KVVDLIK.S                       | 2                 |
|              |                                         |                                                         |       |       |          | 5.00E-05                         | R.INVIQER.E                       |                   |
|              |                                         |                                                         |       |       |          | 0.00034                          | K.LIAAEARK.N                      |                   |
|              |                                         |                                                         |       |       |          | 0.00038                          | K.VGEAEGNIK.L                     |                   |
|              |                                         |                                                         |       |       |          | 2.3                              | R.IRYPDPR.T                       |                   |
|              |                                         |                                                         |       |       |          | 0.00017                          | R.ASNIFVIGK.D                     |                   |
|              |                                         |                                                         |       |       |          | 5.20E-05                         | K.VVMVTGGANR.G                    |                   |
|              |                                         |                                                         |       |       |          | 0.00056                          | K.VVMVTGGANR.G + Oxidation (M)    |                   |
|              |                                         |                                                         |       |       |          | 0.011                            | R.IGEIMSIER.H                     |                   |
|              |                                         |                                                         |       |       |          | 2.70E-05                         | K.VENVYTSTGR.I                    |                   |
|              |                                         |                                                         |       |       |          | 0.019                            | R.IPVAMTHDGHR.I + Oxidation (M)   |                   |
|              |                                         |                                                         |       |       |          | 0.00053                          | R.INVIQEREK.L                     |                   |
|              |                                         |                                                         |       |       |          | 6.50E-08                         | R.LKDAAGHEFATR.A                  |                   |
|              |                                         |                                                         |       |       |          | 0.00033                          | R.THRGDTLVYNLK.E                  |                   |
|              |                                         |                                                         |       |       |          | 7.60E-05                         | K.LLKVENVYTSTGR.I                 |                   |
|              |                                         |                                                         |       |       |          | 4.40E-06                         | K.YPVGFMDVVEIPR.T + Oxidation (M) |                   |
| 0.00016      | R.ASNIFVIGKDMQSVPTLPK.Q + Oxidation (M) |                                                         |       |       |          |                                  |                                   |                   |
| EAN83261.1   | hypothetical protein, conserved         | 30260                                                   | 524   | 16    | 0.00055  | M.PPMLAAAK.S + Oxidation (M)     | 0                                 |                   |
|              |                                         |                                                         |       |       | 0.0085   | K.FKGPEDK.L                      |                                   |                   |
|              |                                         |                                                         |       |       | 0.21     | K.DFNKDVK.D                      |                                   |                   |
|              |                                         |                                                         |       |       | 0.0012   | K.DVKDMLTK.S + Oxidation (M)     |                                   |                   |
|              |                                         |                                                         |       |       | 0.048    | K.EWAVVYIAK.L                    |                                   |                   |
|              |                                         |                                                         |       |       | 0.0015   | K.SYSDAQKWK.L                    |                                   |                   |
|              |                                         |                                                         |       |       | 0.013    | K.NLKPGVLLTHS.-                  |                                   |                   |
|              |                                         |                                                         |       |       | 4.80E-06 | K.FSVDVEYAPR.C                   |                                   |                   |
|              |                                         |                                                         |       |       | 6.40E-05 | R.YAHAGYALAVR.T                  |                                   |                   |
|              |                                         |                                                         |       |       | 0.024    | K.SLTLYKDFNK.D                   |                                   |                   |
|              |                                         |                                                         |       |       | 6.10E-05 | K.LFVNPMATSDGK.F                 |                                   |                   |
|              |                                         |                                                         |       |       | 1.60E-06 | K.LFVNPMATSDGK.F + Oxidation (M) |                                   |                   |
|              |                                         |                                                         |       |       | 0.00021  | K.NKEWAVVYIAK.L                  |                                   |                   |

| Band no.     | Accession no.                                                | Protein Identity | Mr    | SCORE | # PEPT. | E-value  | Sequence                                 | Additional copies |
|--------------|--------------------------------------------------------------|------------------|-------|-------|---------|----------|------------------------------------------|-------------------|
| Band 7 cont. |                                                              |                  |       |       |         | 0.00015  | R.SYTTSFVTPIPK.C                         |                   |
|              |                                                              |                  |       |       |         | 0.00088  | K.NGEYELSHFVMPSR.M                       |                   |
|              |                                                              |                  |       |       |         | 8.20E-05 | K.LVDNWTAAVTLTKNLKPGVLLTHS.-             |                   |
| EAN81197.1   | hypothetical protein, conserved                              |                  | 30269 | 497   | 15      | 0.8      | K.SYSDAHKWK.L                            | 0                 |
| EAN95832.1   | hypothetical protein, conserved                              |                  | 30333 | 496   | 14      | 9.30E-06 | R.YAYAGYALAVR.T                          | 1                 |
| EAN82858.1   | elongation factor 1-alpha (EF-1-alpha), putative             |                  | 49694 | 327   | 10      | 0.0022   | K.VGYNVEK.V                              | 4                 |
|              |                                                              |                  |       |       |         | 0.028    | K.YAWVLDK.L                              |                   |
|              |                                                              |                  |       |       |         | 0.089    | R.TIEKFEK.E                              |                   |
|              |                                                              |                  |       |       |         | 0.002    | K.SVNFAQER.Y                             |                   |
|              |                                                              |                  |       |       |         | 1.50E-06 | K.IGGIGTVPVGR.V                          |                   |
|              |                                                              |                  |       |       |         | 0.0017   | K.STATGHLYK.C                            |                   |
|              |                                                              |                  |       |       |         | 0.098    | R.GITIDIALWK.F                           |                   |
|              |                                                              |                  |       |       |         | 0.021    | K.YAWVLDK.LK.A                           |                   |
|              |                                                              |                  |       |       |         | 0.0001   | K.VHMNLVVVGHVDAGK.S + Oxidation (M)      |                   |
|              |                                                              |                  |       |       |         | 1.90E-05 | R.FIPISGWQGDNMIDK.S + Oxidation (M)      |                   |
| EAN97607.1   | ADP,ATP carrier protein 1, mitochondrial precursor, putative |                  | 35287 | 294   | 8       | 0.026    | K.TVAAPIER.V                             | 0                 |
|              |                                                              |                  |       |       |         | 8.50E-05 | K.TEGAASLMR.G + Oxidation (M)            |                   |
|              |                                                              |                  |       |       |         | 0.11     | K.TEGLYSLWR.G                            |                   |
|              |                                                              |                  |       |       |         | 2.40E-06 | R.YFPTQALNFAFK.D                         |                   |
|              |                                                              |                  |       |       |         | 0.0023   | R.VKLLVQNQGEMIK.Q + Oxidation (M)        |                   |
|              |                                                              |                  |       |       |         | 0.072    | K.LLVQNQGEMIKQGR.L + Oxidation (M)       |                   |
|              |                                                              |                  |       |       |         | 1.60E-09 | K.LGFFFEFMVGGVAAGVSK.T + Oxidation (M)   |                   |
|              |                                                              |                  |       |       |         | 0.044    | R.GIAGAGVLSGVDALKPIYVR.W                 |                   |
| EAN86006.1   | glucosamine-6-phosphate isomerase, putative                  |                  | 31635 | 278   | 8       | 0.00042  | R.FFNNDIR.K                              | 0                 |
|              |                                                              |                  |       |       |         | 0.28     | R.IHDFSPSK.E                             |                   |
|              |                                                              |                  |       |       |         | 0.00023  | K.SVLVIATGSKK.A                          |                   |
|              |                                                              |                  |       |       |         | 0.015    | R.LIQAYREGR.V                            |                   |
|              |                                                              |                  |       |       |         | 0.00018  | K.VPTMALTVGIR.T + Oxidation (M)          |                   |
|              |                                                              |                  |       |       |         | 4.30E-07 | K.SLNDETIASNAR.F                         |                   |
|              |                                                              |                  |       |       |         | 0.002    | R.VKSLNDETIASNAR.F                       |                   |
|              |                                                              |                  |       |       |         | 0.002    | K.ERPFLGLPTGGTPVR.T                      |                   |
| EAN90413.1   | ADP,ATP carrier protein 1, mitochondrial precursor, putative |                  | 35303 | 271   | 7       | 0.00044  | R.GIAGAGVLSGVDALKPMYVR.W                 | 0                 |
|              |                                                              |                  |       |       |         | 0.22     | R.GIAGAGVLSGVDALKPMYVR.W + Oxidation (M) |                   |

| Band no.     | Accession no.                               | Protein Identity       | Mr    | SCORE | # PEPT.  | E-value          | Sequence                              | Additional copies |
|--------------|---------------------------------------------|------------------------|-------|-------|----------|------------------|---------------------------------------|-------------------|
| Band 7 cont. | EAN94839.1                                  | beta tubulin, putative | 50520 | 234   | 8        | 0.099            | R.YLTASALFR.G                         | 0                 |
|              |                                             |                        |       |       |          | 0.051            | K.NMMQAADPR.H + 2 Oxidation (M)       |                   |
|              |                                             |                        |       |       |          | 6.60E-06         | R.VGEQFTAMFR.R + Oxidation (M)        |                   |
|              |                                             |                        |       |       |          | 0.014            | R.IMMTFSIIPSPK.V + 2 Oxidation (M)    |                   |
|              |                                             |                        |       |       |          | 1.50E-05         | K.EVDEQMLNVQNK.N + Oxidation (M)      |                   |
|              |                                             |                        |       |       |          | 1.10E-05         | R.AVLIDLEPGTMDSVR.A + Oxidation (M)   |                   |
|              |                                             |                        |       |       |          | 0.037            | R.GLSVPELTQQMFDK.N + Oxidation (M)    |                   |
|              |                                             |                        |       |       |          | 0.43             | R.LHFFMMMGFAPLTSR.G + 2 Oxidation (M) |                   |
| EAN90437.1   | glucosamine-6-phosphate isomerase, putative | 31635                  | 228   | 7     | 1.30E-05 | K.SLNDETVASNAR.F | 0                                     |                   |
| EAN81873.1   | hypothetical protein, conserved             | 30818                  | 222   | 7     | 0.015    | R.VIIGTEAR.S     | 0                                     |                   |
|              |                                             |                        |       |       |          | 0.016            | R.GRVIIGTEAR.S                        |                   |
|              |                                             |                        |       |       |          | 0.00056          | K.FTTSTQLSMR.N + Oxidation (M)        |                   |
|              |                                             |                        |       |       |          | 0.17             | R.RFGLVFTSQDAP.-                      |                   |
|              |                                             |                        |       |       |          | 0.0043           | R.KGDITLSADVSSNPK.A                   |                   |
|              |                                             |                        |       |       |          | 2.10E-08         | M.APNQFVELVDTVEK.Y                    |                   |
|              |                                             |                        |       |       |          | 0.058            | R.IPVKPLMGAVALVER.G + Oxidation (M)   |                   |
| EAN83852.1   | heat shock 70 kDa protein, putative         | 41044                  | 217   | 5     | 0.012    | R.GTLQPVER.V     | 0                                     |                   |
|              |                                             |                        |       |       |          | 3.20E-05         | R.VEIIANDQGNR.T                       |                   |
|              |                                             |                        |       |       |          | 6.90E-07         | R.TTPSYVAFTDTER.L                     |                   |
|              |                                             |                        |       |       |          | 0.012            | K.AVVTVPAYFNDSQR.Q                    |                   |
|              |                                             |                        |       |       |          | 2.10E-05         | K.TFNPEEVSSMVLSK.M + Oxidation (M)    |                   |
| EAN99433.1   | 60S ribosomal protein L7a, putative         | 34992                  | 151   | 7     | 3.1      | K.ARLGDAVGR.K    | 0                                     |                   |
|              |                                             |                        |       |       |          | 0.2              | R.LFDVATEK.K                          |                   |
|              |                                             |                        |       |       |          | 0.028            | R.SSRNELLK.L                          |                   |
|              |                                             |                        |       |       |          | 0.023            | R.NAGKDAAAVM.- + Oxidation (M)        |                   |
|              |                                             |                        |       |       |          | 0.019            | K.NFGIGHDVPYAR.D                      |                   |
|              |                                             |                        |       |       |          | 5.80E-05         | K.APLSVVTGLQEVTR.T                    |                   |
|              |                                             |                        |       |       |          | 0.0042           | K.KAPLSVVTGLQEVTR.T                   |                   |
| EAN95595.1   | 40S ribosomal protein S6, putative          | 28333                  | 147   | 3     | 0.041    | R.AYLHLIGTR.R    | 0                                     |                   |
|              |                                             |                        |       |       |          | 5.00E-07         | K.QFEITEEVL.R                         |                   |
|              |                                             |                        |       |       |          | 4.90E-06         | R.LGNEVDGAIFGDAFR.G                   |                   |
| EAO00224.1   | 60S ribosomal protein L13, putative         | 25420                  | 136   | 5     | 0.43     | R.FAPTIGIR.V     | 2                                     |                   |
|              |                                             |                        |       |       |          | 0.039            | R.GFTVEELK.A                          |                   |
|              |                                             |                        |       |       |          | 0.14             | K.VFLNQPAQK.L                         |                   |
|              |                                             |                        |       |       |          | 0.0038           | K.LVLFPMYSYK.N + Oxidation (M)        |                   |
|              |                                             |                        |       |       |          | 2.10E-06         | R.FGTAAVGGFVTPAPEAPR.K                |                   |

| Band no.     | Accession no. | Protein Identity                                       | Mr    | SCORE | # PEPT. | E-value  | Sequence                                                                                                                                                                      | Additional copies |
|--------------|---------------|--------------------------------------------------------|-------|-------|---------|----------|-------------------------------------------------------------------------------------------------------------------------------------------------------------------------------|-------------------|
| Band 7 cont. | EAN87804.1    | 60S ribosomal protein L2, putative                     | 28854 | 135   | 7       | 0.0044   | R.IEKPVLK.A<br>0.24 R.LKLPSPGQK.K<br>0.036 R.ILDYAER.H<br>0.024 K.TIEHEPGR.G<br>4.40E-05 R.AMIGIAGGGR.I<br>1.80E-05 R.AMIGIAGGGR.I + Oxidation (M)<br>0.67 K.TIEHEPGRGAPLAR.V | 2                 |
|              | EAN85055.1    | histone H4, putative                                   | 11177 | 117   | 3       | 0.0004   | R.ISGIYDEV.R.G<br>0.0019 R.DATAYTEYSR.K<br>4.40E-05 K.TVTAVDVVNALR.K                                                                                                          | 7                 |
|              | EAN97448.1    | RNA-binding protein, putative                          | 27602 | 114   | 3       | 0.0075   | K.QILELFSGMK.V + Oxidation (M)<br>0.00022 K.EFMGNVLSVVPK.T + Oxidation (M)<br>6.5e-005 R.YAIIFFENAAVK.K                                                                       | 1                 |
|              | EAN90286.1    | glyceraldehyde 3-phosphate dehydrogenase, putative     | 39292 | 106   | 4       | 0.0039   | K.ATLQNNLPK.E<br>0.11 K.VVISAPASGGAK.T<br>0.00073 R.KVVISAPASGGAK.T<br>0.0039 K.AVGMPVSTQGL.L + Oxidation (M)                                                                 | 3                 |
|              | EAN95952.1    | hypothetical protein, conserved                        | 43691 | 105   | 3       | 5.00E-06 | K.VIANLLNR.-<br>1.50E-05 R.FVFTAVLPR.F<br>9.30E-01 R.LIFLYPMSK.L + Oxidation (M)                                                                                              | 0                 |
|              | EAN84522.1    | hypothetical protein, conserved                        | 29041 | 105   | 3       | 0.0015   | K.QVVQLLFPR.M<br>0.00054 K.GALLPALVELSK.A<br>0.00013 R.MLAQDVPSTGASK.E + Oxidation (M)                                                                                        | 1                 |
|              | EAN88964.1    | glycosomal phosphoenolpyruvate carboxykinase, putative | 59404 | 103   | 3       | 0.097    | R.YVEFAHL.-<br>0.00036 K.LSEESFAR.V<br>7.30E-05 R.VWLLNTGYAGGR.A                                                                                                              | 0                 |
|              | EAN83533.1    | histone H2B, putative                                  | 12353 | 97    | 3       | 0.026    | R.ELQTAVR.L<br>0.016 R.LVLPADLAK.H<br>2.20E-06 K.IVNSFVNDLFR.I                                                                                                                | 1                 |
|              | EAN82747.1    | Gim5A protein, putative                                | 27268 | 88    | 3       | 0.0024   | R.GVLNSGLTR.F<br>1.60E-05 R.LSLLLNALSSK.T<br>0.1 R.AIAPNKLHLSDTV.R.G                                                                                                          | 2                 |
|              | EAN88839.1    | prohibitin, putative                                   | 31036 | 86    | 4       | 0.017    | R.SGQGLLELR.R<br>1.6 K.DLQMVNIR.L + Oxidation (M)<br>0.0014 R.YVVQENEQK.K<br>0.0088 R.ILPSISNEILK.A                                                                           | 1                 |

| Band no.     | Accession no. | Protein Identity                                                  | Mr    | SCORE | # PEPT. | E-value  | Sequence                                  | Additional copies |
|--------------|---------------|-------------------------------------------------------------------|-------|-------|---------|----------|-------------------------------------------|-------------------|
| Band 7 cont. | EAN96063.1    | cytochrome c1, heme protein, mitochondrial precursor, putative    | 30202 | 86    | 3       | 0.015    | K.DVVNFLR.W                               | 0                 |
|              |               |                                                                   |       |       |         | 0.0045   | R.MTFTHFQGMTR.E + 2 Oxidation (M)         |                   |
|              |               |                                                                   |       |       |         | 0.0016   | R.AAQFANNSEPPDLQHSVFGK.E                  |                   |
|              | EAN85170.1    | dolichyl-phosphate beta-D-mannosyltransferase precursor, putative | 29445 | 83    | 4       | 0.29     | R.DLSPIGYK.I                              | 0                 |
|              |               |                                                                   |       |       |         | 0.11     | R.GLSSAVIHGISNSK.G                        |                   |
|              |               |                                                                   |       |       |         | 0.0085   | K.YILVMDADLQHPPEAVPR.L + Oxidation (M)    |                   |
|              |               |                                                                   |       |       |         | 0.00067  | R.VLARPLTPLSDPMSGFFGLPK.E + Oxidation (M) |                   |
|              | EAN82710.1    | glutamamyl carboxypeptidase, putative                             | 44359 | 81    | 3       | 0.0038   | R.ALPNETVSK.M                             | 3                 |
|              |               |                                                                   |       |       |         | 0.023    | K.LVAFDTTSR.N                             |                   |
|              |               |                                                                   |       |       |         | 0.0025   | R.EIAEEYRR.N                              |                   |
|              | EAN97655.1    | chaperonin HSP60, mitochondrial precursor                         | 59991 | 76    | 1       | 3.70E-08 | R.AVGVILQSVAEQSR.K                        | 2                 |
|              | EAN81053.1    | alpha tubulin, putative                                           | 50549 | 74    | 2       | 0.014    | R.LSVDYGGK.S                              | 0                 |
|              |               |                                                                   |       |       |         | 1.30E-05 | R.AVFLDLEPTVVDEIR.T                       |                   |
|              | EAN94248.1    | 60S ribosomal protein L7, putative                                | 27987 | 67    | 2       | 0.00045  | R.QIFNTVFVR.L                             | 2                 |
|              |               |                                                                   |       |       |         | 0.0033   | R.AVEPYIAYGYPRLR.T                        |                   |
|              | EAN92689.1    | mitochondrial phosphate transporter, putative                     | 34906 | 65    | 3       | 0.038    | K.SLVPLWSR.Q                              | 0                 |
|              |               |                                                                   |       |       |         | 0.0013   | K.STLGLGTSGGTGK.K                         |                   |
|              |               |                                                                   |       |       |         | 0.15     | R.YLNPDIPTNSYYLK.C                        |                   |
|              | EAN81757.1    | mitochondrial processing peptidase, beta subunit, putative        | 31341 | 65    | 1       | 1.70E-06 | R.AAASNFGDLVAASK.S                        | 0                 |
|              | EAN87966.1    | glucose-regulated protein 78, putative                            | 71414 | 62    | 2       | 0.012    | R.NSLESVAYSLR.N                           | 0                 |
|              |               |                                                                   |       |       |         | 0.00043  | R.ITPSVVAFTETER.L                         |                   |
|              | EAN80947.1    | tryparedoxin peroxidase, putative                                 | 22886 | 55    | 2       | 0.0078   | K.AFQFVEK.H                               | 3                 |
|              |               |                                                                   |       |       |         | 0.0012   | R.GLFIIDPK.Q                              |                   |
|              | EAN81369.1    | 3-oxo-5-alpha-steroid 4-dehydrogenase, putative                   | 29941 | 54    | 3       | 0.008    | K.GYVNSDPK.V                              | 0                 |
|              |               |                                                                   |       |       |         | 0.4      | K.DLGPQVGYR.T                             |                   |
|              |               |                                                                   |       |       |         | 0.096    | R.ELESFVHK.F                              |                   |
|              | EAN80692.1    | farnesyl synthetase, putative                                     | 32609 | 53    | 1       | 1.10E-05 | R.AVLAGDFLLAR.A                           | 1                 |
|              | EAN83495.1    | 40S ribosomal protein S3a, putative                               | 28554 | 51    | 1       | 3.70E-05 | K.FVVQEVQGR.N                             | 4                 |
|              | EAN94685.1    | methylthioadenosine phosphorylase, putative                       | 33600 | 49    | 1       | 4.80E-05 | R.LHEQGTSVTMEGPQFSTK.A + Oxidation (M)    | 1                 |
|              | EAN91936.1    | 14-3-3 protein, putative                                          | 29450 | 48    | 1       | 5.60E-05 | K.LNPNVLSSEER.N                           | 1                 |
|              | EAN81327.1    | cytochrome-B5 reductase, putative                                 | 34753 | 45    | 3       | 0.086    | R.FYTPVTR.N                               | 1                 |
|              |               |                                                                   |       |       |         | 0.0073   | K.LVGAPPSVLK.A                            |                   |
|              |               |                                                                   |       |       |         | 0.12     | K.MLQETMPKPAK.N + 2 Oxidation (M)         |                   |
|              | EAN99627.1    | hypothetical protein, conserved                                   | 35045 | 43    | 1       | 0.00014  | R.SAETASELVSK.L                           | 0                 |

| Band no.     | Accession no.                             | Protein Identity                                 | Mr    | SCORE | # PEPT. | E-value       | Sequence                      | Additional copies |
|--------------|-------------------------------------------|--------------------------------------------------|-------|-------|---------|---------------|-------------------------------|-------------------|
| Band 7 cont. | EAN87577.1                                | hypothetical protein, conserved                  | 40702 | 42    | 2       | 2             | K.LMSTMLR.E + 2 Oxidation (M) | 1                 |
|              |                                           |                                                  |       |       |         | 0.00015       | K.SIFDKLDTLR.W                |                   |
|              | EAN82896.1                                | hypothetical protein, conserved                  | 29537 | 42    | 2       | 0.017         | M.VFLTLLR.T                   | 1                 |
|              |                                           |                                                  |       |       |         | 0.0054        | R.YLVTTEVLR.F                 |                   |
|              | EAN92511.1                                | prostaglandin F synthase, putative               | 32845 | 41    | 1       | 0.00022       | R.AQDGAETANAVR.W              | 0                 |
|              | EAN91318.1                                | I/6 autoantigen, putative                        | 23495 | 40    | 1       | 0.00035       | R.VSLQEIAAK.T                 | 1                 |
|              | EAN90694.1                                | serine/threonine protein kinase, putative        | 34153 | 38    | 1       | 0.00051       | K.IIDKEQLVR.E                 | 1                 |
|              | EAN83816.1                                | 60S ribosomal protein L5, putative               | 34902 | 37    | 1       | 0.00022       | K.EADGSYS AVR.T               | 2                 |
|              | EAN87359.1                                | mitochondrial malate dehydrogenase, putative     | 31921 | 33    | 1       | 0.00086       | R.LFGVTTLDLVR.A               | 1                 |
|              | EAN89428.1                                | mitochondrial carrier protein, putative          | 32010 | 32    | 1       | 0.0022        | K.GFYAGIIPR.M                 | 1                 |
|              | EAN84418.1                                | 60S ribosomal protein L13a, putative             | 32939 | 29    | 1       | 0.0068        | R.SPSDIFLR.T                  | 3                 |
|              | EAN99701.1                                | hypothetical protein, conserved                  | 31603 | 29    | 1       | 0.0036        | R.IADSGAFIIR.A                | 0                 |
|              | EAN88665.1                                | 60S ribosomal protein L10, putative              | 25170 | 29    | 1       | 0.0036        | R.ELEQISSEALEAAR.I            | 3                 |
|              | EAN81251.1                                | 40S ribosomal protein S8, putative               | 30143 | 25    | 1       | 0.0049        | R.ILDVVYNATSNELVR.T           | 2                 |
|              | EAN85113.1                                | elongation factor 1-gamma (EF-1-gamma), putative | 47053 | 24    | 1       | 0.0069        | K.AAAAAADGAEEDAPREK.K         | 0                 |
|              | EAN99763.1                                | hypothetical protein, conserved                  | 30157 | 23    | 1       | 0.0091        | R.LLFIETAR.N                  | 0                 |
| EAN98359.1   | lanosterol 14-alpha-demethylase, putative | 55343                                            | 20    | 1     | 0.0024  | K.ILGEIIVAR.E | 1                             |                   |



| <b>TABLE S2 (BANDS 8-10): COMPLETE PEPTIDE LIST</b> |                      |                                                    |           |              |                |                | <b>Mascot</b>                        | <b>Additional gene copies under same match</b> |
|-----------------------------------------------------|----------------------|----------------------------------------------------|-----------|--------------|----------------|----------------|--------------------------------------|------------------------------------------------|
| <b>Band no.</b>                                     | <b>Accession no.</b> | <b>Protein Identity</b>                            | <b>Mr</b> | <b>SCORE</b> | <b># PEPT.</b> | <b>E-value</b> | <b>Sequence</b>                      |                                                |
| Band 8                                              | EAN94839.1           | beta tubulin, putative                             | 50520     | 536          | 17             | 7.2E-03        | R.YLTASALFR.G                        | 0                                              |
|                                                     |                      |                                                    |           |              |                | 7.3E-03        | K.NMMQAADPR.H + Oxidation (M)        |                                                |
|                                                     |                      |                                                    |           |              |                | 3.0E-04        | K.NMMQAADPR.H + 2 Oxidation (M)      |                                                |
|                                                     |                      |                                                    |           |              |                | 7.5E-03        | K.LREEYPDR.I                         |                                                |
|                                                     |                      |                                                    |           |              |                | 6.0E-05        | K.LAVNLVPFPR.L                       |                                                |
|                                                     |                      |                                                    |           |              |                | 7.6E-04        | R.FPGQLNSDLR.K                       |                                                |
|                                                     |                      |                                                    |           |              |                | 7.4E-05        | R.VGEQFTAMFR.R + Oxidation (M)       |                                                |
|                                                     |                      |                                                    |           |              |                | 3.8E-05        | R.KLAVNLVPFPR.L                      |                                                |
|                                                     |                      |                                                    |           |              |                | 1.6E-02        | R.FPGQLNSDLR.K.L                     |                                                |
|                                                     |                      |                                                    |           |              |                | 9.0E-08        | R.INVYFDEATGGR.Y                     |                                                |
|                                                     |                      |                                                    |           |              |                | 2.7E-03        | R.IMMTFSIIPSPK.V + 2 Oxidation (M)   |                                                |
|                                                     |                      |                                                    |           |              |                | 1.5E-04        | K.EVDEQMLNVQNK.N + Oxidation (M)     |                                                |
|                                                     |                      |                                                    |           |              |                | 9.2E-05        | R.AVLIDLEPGTMDSVR.A                  |                                                |
|                                                     |                      |                                                    |           |              |                | 9.7E-06        | R.AVLIDLEPGTMDSVR.A + Oxidation (M)  |                                                |
|                                                     |                      |                                                    |           |              |                | 5.4E-03        | R.GLSVPELTQQMFDAK.N                  |                                                |
|                                                     |                      |                                                    |           |              |                | 1.8E-04        | R.GLSVPELTQQMFDAK.N + Oxidation (M)  |                                                |
|                                                     |                      |                                                    |           |              |                | 2.9E-02        | R.LHFFMMGFAPLTSR.G + 2 Oxidation (M) |                                                |
|                                                     | EAN91944.1           | glyceraldehyde 3-phosphate dehydrogenase, putative | 39277     | 480          | 12             | 6.9E-02        | K.TVDGVSVK.D                         | 1                                              |
|                                                     |                      |                                                    |           |              |                | 7.6E-04        | K.YNVTTTK.S                          |                                                |
|                                                     |                      |                                                    |           |              |                | 5.6E-02        | R.NPADLPWGK.L                        |                                                |
|                                                     |                      |                                                    |           |              |                | 2.4E-04        | K.ATLQNNLPK.E                        |                                                |
|                                                     |                      |                                                    |           |              |                | 3.1E-03        | K.VVISAPASGGAK.T                     |                                                |
|                                                     |                      |                                                    |           |              |                | 2.9E-02        | K.FKYNVTTTK.S                        |                                                |
|                                                     |                      |                                                    |           |              |                | 2.2E-03        | R.KVVISAPASGGAK.T                    |                                                |
|                                                     |                      |                                                    |           |              |                | 9.2E-03        | K.AVGMVIPSTQGK.L + Oxidation (M)     |                                                |
|                                                     |                      |                                                    |           |              |                | 8.1E-04        | R.AAAVNIIPSTTGAAC.A                  |                                                |
|                                                     |                      |                                                    |           |              |                | 3.9E-07        | R.DTSIQEIDAALKR.A                    |                                                |
|                                                     |                      |                                                    |           |              |                | 4.7E-07        | K.LGVEYVIESTGLFTAK.A                 |                                                |
|                                                     |                      |                                                    |           |              |                | 7.2E-10        | R.VPTPDVSVVDLTFDAAR.D                |                                                |
|                                                     | EAN90286.1           | glyceraldehyde 3-phosphate dehydrogenase, putative | 39292     | 431          | 12             | 5.2E-01        | K.YTVTTTK.S                          | 1                                              |
|                                                     | EAN83816.1           | 60S ribosomal protein L5, putative                 | 34902     | 385          | 12             | 2.8E-03        | R.QMVLQDK.T + Oxidation (M)          | 1                                              |
|                                                     |                      |                                                    |           |              |                | 1.8E-03        | K.AILDVGLAR.T                        |                                                |

| Band no.   | Accession no.                                       | Protein Identity | Mr    | SCORE | # PEPT. | E-value | Mascot<br>Sequence                  | Additional copies |
|------------|-----------------------------------------------------|------------------|-------|-------|---------|---------|-------------------------------------|-------------------|
| 8 cont.    | EAN83816.1                                          | cont.            |       |       |         | 1.8E-08 | K.IAFLVASIR.E                       |                   |
|            |                                                     |                  |       |       |         | 9.4E-01 | R.RQMVLQDK.T + Oxidation (M)        |                   |
|            |                                                     |                  |       |       |         | 6.1E-05 | K.EADGSYS AVR.T                     |                   |
|            |                                                     |                  |       |       |         | 9.5E-05 | K.LGLANKFEGTK.E                     |                   |
|            |                                                     |                  |       |       |         | 9.2E-04 | K.EKIAFLVASIR.E                     |                   |
|            |                                                     |                  |       |       |         | 3.5E-03 | R.ILGLHVAEYLK.Q                     |                   |
|            |                                                     |                  |       |       |         | 6.0E-01 | K.VVPNELEGM YK.K                    |                   |
|            |                                                     |                  |       |       |         | 4.7E-01 | K.VVPNELEGM YK.K + Oxidation (M)    |                   |
|            |                                                     |                  |       |       |         | 8.3E-03 | K.VVPNELEGM YK.K.A + Oxidation (M)  |                   |
|            |                                                     |                  |       |       |         | 2.1E-06 | R.ITNRDIIAQVVQAK.V                  |                   |
| EAN82497.1 | casein kinase, putative                             |                  | 38355 | 328   | 11      | 5.4E-02 | R.IEFVHSK.S                         | 1                 |
|            |                                                     |                  |       |       |         | 4.4E+00 | R.ERGDVEQA.-                        |                   |
|            |                                                     |                  |       |       |         | 1.3E-03 | R.GSLPWQGLK.A                       |                   |
|            |                                                     |                  |       |       |         | 3.4E-02 | R.HPQLAFEAR.F                       |                   |
|            |                                                     |                  |       |       |         | 2.0E-06 | K.IGAGSFGEIFR.G                     |                   |
|            |                                                     |                  |       |       |         | 1.4E-03 | K.TRHPQLAFEAR.F                     |                   |
|            |                                                     |                  |       |       |         | 3.4E-03 | R.GTNMQTGETVAIK.L + Oxidation (M)   |                   |
|            |                                                     |                  |       |       |         | 1.6E-05 | K.TTLMLAEQMIAR.I + Oxidation (M)    |                   |
|            |                                                     |                  |       |       |         | 9.7E-08 | K.TTLMLAEQMIAR.I + 2 Oxidation (M)  |                   |
|            |                                                     |                  |       |       |         | 1.1E-02 | R.DMKPDNFLMGTGK.K + 2 Oxidation (M) |                   |
|            |                                                     |                  |       |       |         | 1.2E-02 | R.FEDKPDYSYLKRL                     |                   |
| EAN89795.1 | pyruvate dehydrogenase E1 beta subunit,<br>putative |                  | 38411 | 320   | 8       | 3.4E-02 | R.TIIESIMK.T                        | 0                 |
|            |                                                     |                  |       |       |         | 1.1E-03 | R.TIIESIMK.T + Oxidation (M)        |                   |
|            |                                                     |                  |       |       |         | 3.8E-03 | K.GLLDKYGT SR.V                     |                   |
|            |                                                     |                  |       |       |         | 3.0E-03 | K.EGIEAEVINLR.S                     |                   |
|            |                                                     |                  |       |       |         | 8.7E-05 | K.VFAPYNS EDAR.G                    |                   |
|            |                                                     |                  |       |       |         | 1.0E-03 | R.VGQHISMIGFSR.G + Oxidation (M)    |                   |
|            |                                                     |                  |       |       |         | 1.1E-07 | K.VFILGEEVGQYQGAYK.V                |                   |
|            |                                                     |                  |       |       |         | 7.7E-08 | K.DLEVASQPQVSDVLAVAR.R              |                   |
| EAN87359.1 | mitochondrial malate dehydrogenase, putative        |                  | 31921 | 302   | 7       | 3.6E-03 | R.TFVAEAGGK.S                       | 1                 |
|            |                                                     |                  |       |       |         | 3.7E-03 | K.FEESLMEK.A + Oxidation (M)        |                   |
|            |                                                     |                  |       |       |         | 1.6E-05 | R.LFGVTTLDLVR.A                     |                   |
|            |                                                     |                  |       |       |         | 6.2E-05 | K.VTGYTK EEINK.A                    |                   |
|            |                                                     |                  |       |       |         | 2.5E-05 | R.VQYGGDEVVQAK.D                    |                   |
|            |                                                     |                  |       |       |         | 8.9E-06 | R.DDLFNTNASIVR.D                    |                   |
|            |                                                     |                  |       |       |         | 6.6E-05 | K.ALDGAELVLIPAGVPR.K                |                   |

| Band no. | Accession no. | Protein Identity                                    | Mr    | Mascot<br>SCORE | # PEPT. | E-value | Sequence                            | Additional copies |
|----------|---------------|-----------------------------------------------------|-------|-----------------|---------|---------|-------------------------------------|-------------------|
| 8 cont.  | EAN82858.1    | elongation factor 1-alpha (EF-1-alpha),<br>putative | 49694 | 285             | 10      | 1.7E-03 | K.VGYNVEK.V                         | 3                 |
|          |               |                                                     |       |                 |         | 1.2E-02 | K.FAEIESK.I                         |                   |
|          |               |                                                     |       |                 |         | 7.0E-01 | R.TIEKFEK.E                         |                   |
|          |               |                                                     |       |                 |         | 1.1E-02 | R.QTVAVGIK.A                        |                   |
|          |               |                                                     |       |                 |         | 4.8E-03 | K.SVNFAQER.Y                        |                   |
|          |               |                                                     |       |                 |         | 3.5E-02 | R.LPLQDVYK.I                        |                   |
|          |               |                                                     |       |                 |         | 2.4E-06 | K.IGGIGTVPVGR.V                     |                   |
|          |               |                                                     |       |                 |         | 1.1E-02 | K.STATGHLYK.C                       |                   |
|          |               |                                                     |       |                 |         | 2.4E-02 | R.EHALLAFTLGVK.Q                    |                   |
|          |               |                                                     |       |                 |         | 2.3E-04 | K.VHMNLVVVGHVDAGK.S + Oxidation (M) |                   |
|          | EAN82496.1    | casein kinase, putative                             | 38351 | 273             | 9       | 2.7E-03 | K.TRHPQLAFEVR.F                     | 0                 |
|          | EAN97324.1    | pyruvate dehydrogenase E1 beta subunit,<br>putative | 38393 | 266             | 8       | 1.3E-02 | K.DLELASQPQVSDVLAVHR.V              | 0                 |
|          | EAN86374.1    | ATP synthase F1 subunit gamma protein,<br>putative  | 34733 | 250             | 8       | 6.3E-02 | R.TSSLYNK.T                         | 1                 |
|          |               |                                                     |       |                 |         | 6.6E-03 | R.FVSAGVQK.H                        |                   |
|          |               |                                                     |       |                 |         | 2.6E+00 | K.LYPNEFK.Y                         |                   |
|          |               |                                                     |       |                 |         | 4.9E-02 | K.MVLMPIGK.R + 2 Oxidation (M)      |                   |
|          |               |                                                     |       |                 |         | 1.2E-03 | K.HAVYNIPSFEK.W                     |                   |
|          |               |                                                     |       |                 |         | 3.1E-04 | K.NALVYIPITNR.G                     |                   |
|          |               |                                                     |       |                 |         | 2.6E-10 | R.LVAVEGQLTNISTLK.Q                 |                   |
|          |               |                                                     |       |                 |         | 2.2E-02 | R.LVAVEGQLTNISTLKQR.T               |                   |
|          | EAN81053.1    | alpha tubulin, putative                             | 50549 | 229             | 6       | 1.1E-02 | R.LSVDYGKK.S                        | 0                 |
|          |               |                                                     |       |                 |         | 3.7E-04 | K.DVNAAVATIK.T                      |                   |
|          |               |                                                     |       |                 |         | 3.6E-03 | R.IDHKFDLMYSK.R + Oxidation (M)     |                   |
|          |               |                                                     |       |                 |         | 5.8E-10 | R.LIGQVVSALTASLR.F                  |                   |
|          |               |                                                     |       |                 |         | 1.8E-02 | R.NLDIERPTYTNLNR.L                  |                   |
|          |               |                                                     |       |                 |         | 6.2E-03 | R.IHFVLTSYAPVISA EK.A               |                   |
|          | EAN94545.1    | hypothetical protein, conserved                     | 24439 | 193             | 4       | 1.6E-03 | K.ENVKVER.K                         | 0                 |
|          |               |                                                     |       |                 |         | 2.2E-04 | R.SYITYAIALLR.G                     |                   |
|          |               |                                                     |       |                 |         | 2.5E-05 | R.GEDGKVQNDTIK.I                    |                   |
|          |               |                                                     |       |                 |         | 7.8E-08 | K.EQDDPEPGESAGENR.N                 |                   |
|          | EAN81197.1    | hypothetical protein, conserved                     | 30269 | 148             | 4       | 1.0E-02 | K.NLKPGVLLTHS.-                     | 1                 |
|          |               |                                                     |       |                 |         | 3.0E-08 | K.FSVDVEYAPR.C                      |                   |
|          |               |                                                     |       |                 |         | 5.1E-04 | R.YAHAGYALAVR.T                     |                   |
|          |               |                                                     |       |                 |         | 4.6E-01 | K.SLTLYKDFNK.D                      |                   |

| Band no.   | Accession no.                                  | Protein Identity                   | Mr    | Mascot |         | E-value                           | Sequence             | Additional copies |
|------------|------------------------------------------------|------------------------------------|-------|--------|---------|-----------------------------------|----------------------|-------------------|
|            |                                                |                                    |       | SCORE  | # PEPT. |                                   |                      |                   |
| 8 cont.    | EAN95595.1                                     | 40S ribosomal protein S6, putative | 28333 | 147    | 3       | 1.1E-03                           | R.GAVGFNTFR.G        | 1                 |
|            |                                                |                                    |       |        |         | 1.2E-05                           | R.LGNEVDGAIFGDAFR.G  |                   |
|            |                                                |                                    |       |        |         | 4.9E-06                           | K.TGEQPIEGVTDVSVPR.R |                   |
| EAN83533.1 | histone H2B, putative                          | 12353                              | 139   | 3      | 2.0E-03 | R.LVLPADLAK.H                     | 1                    |                   |
|            |                                                |                                    |       |        | 3.1E-06 | R.IASEAATVVR.V                    |                      |                   |
|            |                                                |                                    |       |        | 4.1E-06 | K.IVNSFVNDLFR.I                   |                      |                   |
| EAN87011.1 | RNA-binding protein, putative                  | 31148                              | 136   | 4      | 2.1E-03 | R.YTDLIADR.M                      | 1                    |                   |
|            |                                                |                                    |       |        | 1.1E-04 | R.SQQVNEFGR.K                     |                      |                   |
|            |                                                |                                    |       |        | 1.2E-04 | R.ETFQQVGNVER.A                   |                      |                   |
|            |                                                |                                    |       |        | 9.1E-02 | R.LFDDGPRPIVQR.G                  |                      |                   |
| EAN91782.1 | hypothetical protein, conserved                | 36162                              | 134   | 4      | 5.9E-03 | K.LSTIEATR.R                      | 0                    |                   |
|            |                                                |                                    |       |        | 1.2E+00 | K.LSTIEATRR.L                     |                      |                   |
|            |                                                |                                    |       |        | 1.5E-04 | K.VAVDLGGEGMR.Y + Oxidation (M)   |                      |                   |
|            |                                                |                                    |       |        | 4.2E-06 | R.LVAPPSYIADQLFASAGR.L            |                      |                   |
| EAN87428.1 | hypothetical protein, conserved                | 37186                              | 134   | 5      | 1.7E-01 | K.EYLVEPK.M                       | 0                    |                   |
|            |                                                |                                    |       |        | 1.9E-01 | R.VSFPATEEK.A                     |                      |                   |
|            |                                                |                                    |       |        | 7.4E-06 | R.LDDGLTPEDR.A                    |                      |                   |
|            |                                                |                                    |       |        | 1.1E-03 | K.SNVLSEYITR.M                    |                      |                   |
|            |                                                |                                    |       |        | 2.3E-02 | R.RMVETSLNYGLQR.S + Oxidation (M) |                      |                   |
| EAN98352.1 | pyruvate phosphate dikinase, putative          | 101833                             | 114   | 3      | 7.7E-04 | R.SATGVAFSR.S                     | 1                    |                   |
|            |                                                |                                    |       |        | 2.4E-03 | R.GTKFDTLTAK.D                    |                      |                   |
|            |                                                |                                    |       |        | 3.4E-05 | R.TPQQIGQSLSLR.W                  |                      |                   |
| EAN94284.1 | reiske iron-sulfur protein precursor, putative | 34159                              | 112   | 4      | 8.0E-03 | R.GRPVFVYK.R                      | 1                    |                   |
|            |                                                |                                    |       |        | 3.9E-05 | K.LPELEDR.A                       |                      |                   |
|            |                                                |                                    |       |        | 5.3E-03 | R.IETTAGVALK.D                    |                      |                   |
|            |                                                |                                    |       |        | 5.3E-02 | R.QGPAPLNLEVPPYK.W                |                      |                   |
| EAN81270.1 | sterol 24-c-methyltransferase, putative        | 41138                              | 112   | 3      | 2.4E-02 | K.QQVIEALK.A                      | 1                    |                   |
|            |                                                |                                    |       |        | 3.9E-06 | K.GAEILEEAAR.S                    |                      |                   |
|            |                                                |                                    |       |        | 3.0E-03 | R.VLEFAGLAPSGTHK.G                |                      |                   |
| EAN83495.1 | 40S ribosomal protein S3a, putative            | 28554                              | 107   | 2      | 1.5E-03 | K.FVVQEVQGR.N                     | 4                    |                   |
| EAN90616.1 | glycosomal malate dehydrogenase, putative      | 34347                              | 105   | 2      | 2.6E-05 | K.LLGVSLLDGLR.A                   | 1                    |                   |
|            |                                                |                                    |       |        | 3.0E-06 | R.GSATLSMAEAGAR.F + Oxidation (M) |                      |                   |
| EAN92511.1 | prostaglandin F synthase, putative             | 32845                              | 100   | 2      | 2.2E-03 | K.SPAQVVIR.W                      | 0                    |                   |
|            |                                                |                                    |       |        | 2.0E-07 | R.AQDGAETANAVR.W                  |                      |                   |
| EAN87575.1 | hypothetical protein, conserved                | 37110                              | 100   | 4      | 2.7E-01 | R.VSFPATEK.A                      | 0                    |                   |

| Band no. | Accession no. | Protein Identity                                       | Mr    | Mascot |         | E-value                                  | Sequence                                                              | Additional copies |
|----------|---------------|--------------------------------------------------------|-------|--------|---------|------------------------------------------|-----------------------------------------------------------------------|-------------------|
|          |               |                                                        |       | SCORE  | # PEPT. |                                          |                                                                       |                   |
| 8 cont.  | EAN90238.1    | prohibitin, putative                                   | 33115 | 98     | 3       | 6.8E-02<br>4.7E-04<br>9.3E-05            | K.EYTSAVEAK.Q<br>R.DLQTVNLAVR.V<br>K.GAILLAEGEAEAAK.L                 | 1                 |
|          | EAN83852.1    | heat shock 70 kDa protein, putative                    | 41044 | 90     | 3       | 9.4E-03<br>3.0E-03<br>1.2E-03            | R.GTLQPVER.V<br>K.DAGTIAGMEVLR.I + Oxidation (M)<br>R.AVHDVVLVGGSTR.I | 1                 |
|          | EAN85971.1    | NADH-cytochrome B5 reductase, putative                 | 34825 | 88     | 2       | 5.2E-04<br>3.8E-05                       | R.GPVGNFYLGK.G<br>K.YGTGYVDEATLR.A                                    | 1                 |
|          | EAN85276.1    | hypothetical protein                                   | 52756 | 87     | 1       | 3.9E-09                                  | R.FADANEENVPAAQVNR.V                                                  | 1                 |
|          | EAN92507.1    | fibrillarin, putative                                  | 30769 | 82     | 3       | 5.6E-01<br>1.2E-01<br>8.4E-06            | K.EQASLEPFER.D<br>R.NNIVPILEDAR.Y<br>R.VSGTIAGETESTEFR.V              | 1                 |
|          | EAN95882.1    | activated protein kinase C receptor, putative          | 35649 | 82     | 2       | 8.0E-05<br>8.2E-04                       | K.DVLSVTFSPDNR.Q<br>R.DNTLIAWGSNMDR.N + Oxidation (M)                 | 1                 |
|          | EAN98272.1    | eukaryotic initiation factor 4a, putative              | 49984 | 74     | 2       | 8.8E-04<br>1.2E-04                       | R.VLVTTLVAR.G<br>K.LQAGSIVAVGTPGR.V                                   | 1                 |
|          | EAN80947.1    | tryparedoxin peroxidase, putative                      | 22886 | 66     | 3       | 5.7E-01<br>3.7E-04<br>2.0E-03            | K.AFQFVEK.H<br>R.GLFIIDPK.Q<br>R.QITVNDLPVGR.D                        | 3                 |
|          | EAN88371.1    | glutathione-S-transferase/glutaredoxin, putative       | 35538 | 66     | 4       | 2.6E-02<br>1.3E-02<br>4.4E-02<br>7.4E-01 | K.EISSFAYK.K<br>K.EHPQILLYR.Y<br>R.LHGEINTFIEK.A<br>R.LLTLEFNSSLYR.A  | 1                 |
|          | EAN87824.1    | hypothetical protein, conserved                        | 29236 | 65     | 2       | 2.5E-02<br>9.0E-05                       | R.FVFTAVLPR.F<br>K.IINLSAEEIR.A                                       | 1                 |
|          | EAN87301.1    | hypothetical protein, conserved                        | 33827 | 63     | 2       | 9.5E-03<br>3.7E-04                       | R.LATSYGVLR.Y<br>R.YAYLSAAVR.A                                        | 1                 |
|          | EAN88964.1    | Glycosomal phosphoenolpyruvate carboxykinase, putative | 59404 | 59     | 2       | 1.5E-03<br>1.3E-02                       | K.TTLSADPHR.N<br>K.TEKDIYDAVR.F                                       | 1                 |
|          | EAN97655.1    | chaperonin HSP60, mitochondrial precursor              | 59991 | 58     | 1       | 2.7E-06                                  | R.AVGVILQSVAEQSR.K                                                    | 2                 |
|          | EAN84262.1    | tricarboxylate carrier, putative                       | 36312 | 57     | 2       | 9.2E-01<br>1.3E-05                       | K.VVDEEDGEVR.G<br>R.VPSGTLQATVIR.A                                    | 0                 |
|          | EAN99701.1    | hypothetical protein, conserved                        | 31603 | 57     | 1       | 7.3E-06                                  | R.IADSGAFIIR.A                                                        | 0                 |
|          | EAN93401.1    | hypothetical protein, conserved                        | 36346 | 54     | 3       | 2.6E-01<br>4.8E-01<br>1.2E-03            | R.QVVYAPAR.L<br>K.LPSGQAAELK.Y<br>K.GASPETAPSIADR.A                   | 1                 |
|          | EAN98983.1    | succinyl-CoA synthetase alpha subunit, putative        | 32274 | 52     | 1       | 1.9E-05                                  | R.SGTLTYEAVAQTTAK.S                                                   | 0                 |

| Band no. | Accession no. | Protein Identity                                                                 | Mr    | Mascot |         | E-value            | Sequence                                       | Additional copies |
|----------|---------------|----------------------------------------------------------------------------------|-------|--------|---------|--------------------|------------------------------------------------|-------------------|
|          |               |                                                                                  |       | SCORE  | # PEPT. |                    |                                                |                   |
| 8 cont.  | EAN85330.1    | histone H2A, putative                                                            | 14385 | 49     | 2       | 1.4E-02<br>5.7E-03 | R.GGVMPSLNK.A + Oxidation (M)<br>K.AGLIFPVGR.V | 13                |
|          | EAN87340.1    | RNA-binding protein, putative                                                    | 50174 | 49     | 1       | 4.6E-05            | R.NIAENTTEQQLR.E                               | 1                 |
|          | EAN85190.1    | hypothetical protein, conserved                                                  | 43072 | 47     | 1       | 8.2E-05            | K.AILEYNATLAER.E                               | 1                 |
|          | EAN87214.1    | hypothetical protein, conserved                                                  | 36338 | 47     | 2       | 1.7E-02<br>1.5E-02 | R.HQTPLDDGVK.L<br>R.LAHQEYTVYELK.S             | 3                 |
|          | EAN83925.1    | 40S ribosomal protein S2, putative                                               | 28727 | 45     | 1       | 1.8E-05            | R.GAGIVAAPVVK.K                                | 3                 |
|          | EAN82415.1    | 40S ribosomal protein SA, putative                                               | 28114 | 45     | 2       | 2.7E-03<br>3.3E-02 | R.VLLVTDPR.T<br>R.FIPGTFNLIQK.K                | 2                 |
|          | EAN88258.1    | hypothetical protein, conserved<br>ADP,ATP carrier protein 1, mitochondrial      | 32143 | 45     | 1       | 9.9E-05            | R.ALEIAQQGAEAK.G                               | 1                 |
|          | EAN90413.1    | precursor, putative                                                              | 35303 | 43     | 1       | 1.5E-04            | K.LLVQNQGEMIK.Q + Oxidation (M)                | 1                 |
|          | EAN84604.1    | histone H3, putative                                                             | 21714 | 38     | 1       | 5.1E-04            | R.STDLLLQK.A                                   | 7                 |
|          | EAN98396.1    | hypothetical protein, conserved                                                  | 64335 | 38     | 2       | 3.2E-03<br>2.2E-01 | K.AANDAVEAALK.K<br>K.LSTATPHFSAAPPELK.E        | 0                 |
|          | EAN87271.1    | glycosomal membrane protein, putative                                            | 24137 | 38     | 1       | 6.5E-04            | K.SVSSSITDGR.S                                 | 1                 |
|          | EAN87634.1    | 60S ribosomal protein L7a, putative                                              | 34671 | 38     | 1       | 2.3E-04            | K.KAPLSVVTGLQEVTR.T                            | 1                 |
|          | EAN86269.1    | 60S ribosomal protein L19, putative                                              | 37755 | 35     | 1       | 1.5E-03            | R.QLAEQLAAK.R                                  | 3                 |
|          | EAN99009.1    | peroxin-2, putative                                                              | 37929 | 34     | 1       | 1.0E-03            | R.LVYGSQSTQR.V                                 | 0                 |
|          | EAN85108.1    | hypothetical protein, conserved                                                  | 45955 | 34     | 1       | 9.0E-04            | R.STAENVSSDAMGNLR.G + Oxidation (M)            | 1                 |
|          | EAO00202.1    | 6-phospho-1-fructokinase, putative                                               | 54100 | 34     | 1       | 1.2E-03            | R.ELEAISLVR.E                                  | 0                 |
|          | EAN87845.1    | 40S ribosomal protein S4, putative                                               | 30998 | 31     | 1       | 1.9E-03            | R.ASNIFVIGK.D                                  | 2                 |
|          | EAN89722.1    | 60S ribosomal protein L34, putative                                              | 19668 | 30     | 1       | 6.2E-03            | R.AFLIEEQR.I                                   | 3                 |
|          | EAN94586.1    | hypothetical protein, conserved                                                  | 30181 | 29     | 1       | 2.2E-03            | R.VLEATLSPLEK.A                                | 1                 |
|          | EAN87063.1    | hypothetical protein, conserved<br>fructose-bisphosphate aldolase, glycosomal,   | 44364 | 21     | 1       | 1.5E-02            | R.EDLNEVER.K                                   | 0                 |
|          | EAN86096.1    | putative                                                                         | 23483 | 26     | 1       | 1.3E-02            | R.FNAETLAR.Y                                   | 3                 |
|          | EAN87418.1    | heat shock protein-like protein, putative                                        | 36225 | 24     | 1       | 6.6E-03            | R.NEDLSNPR.G                                   | 1                 |
|          | EAN82309.1    | hypothetical protein, conserved                                                  | 26480 | 23     | 2       | 1.5E+00<br>8.4E-02 | R.MLTTNPLR.Y + Oxidation (M)<br>R.ELEVSTLAEK.N | 1                 |
|          | EAN82747.1    | Gim5A protein, putative<br>mucin-associated surface protein (MASP),              | 27268 | 21     | 1       | 3.7E-02            | R.GVLNSGLTR.F                                  | 3                 |
|          | EAN84330.1    | putative                                                                         | 44673 | 20     | 1       | 4.3E-02            | K.VAISLPSR.M                                   | 1                 |
|          | EAN97099.1    | hypothetical protein, conserved<br>dihydrolipoamide acetyltransferase precursor, | 34072 | 20     | 1       | 2.8E-02            | R.AFLYEAQV.K                                   | 0                 |
|          | EAN93711.1    | putative                                                                         | 49984 | 19     | 1       | 3.6E-02            | K.ITVNDYTIK.A                                  | 1                 |
|          | EAN85329.1    | hypothetical protein, conserved                                                  | 72639 | 19     | 1       | 3.9E-02            | R.EIESSISALRNDILR.Q                            | 0                 |
|          | EAN97577.1    | hypothetical protein, conserved                                                  | 56966 | 18     | 1       | 4.2E-02            | R.QQAAAEALR.L                                  | 0                 |
|          | EAN88802.1    | hypothetical protein, conserved                                                  | 28041 | 18     | 1       | 8.1E-02            | R.LPSETADKK.G                                  | 1                 |
|          | EAN94012.1    | hypothetical protein, conserved                                                  | 30503 | 17     | 1       | 5.4E-02            | R.FLSVSYGSPETR.M                               | 1                 |

| Band no. | Accession no. | Protein Identity                                      | Mr    | Mascot<br>SCORE | # PEPT. | E-value | Sequence                                  | Additional copies |
|----------|---------------|-------------------------------------------------------|-------|-----------------|---------|---------|-------------------------------------------|-------------------|
| Band 9   | EAN91944.1    | glyceraldehyde 3-phosphate dehydrogenase,<br>putative | 39277 | 779             | 22      | 1.3E-01 | K.TVDGVSVK.D                              | 1                 |
|          |               |                                                       |       |                 |         | 1.2E-01 | K.LTGMSFR.V                               |                   |
|          |               |                                                       |       |                 |         | 1.1E-05 | K.VGINGFGR.I                              |                   |
|          |               |                                                       |       |                 |         | 1.8E-04 | K.YNVTTTK.S                               |                   |
|          |               |                                                       |       |                 |         | 1.1E-02 | R.NPADLPWGK.L                             |                   |
|          |               |                                                       |       |                 |         | 2.1E-04 | K.ATLQNNLPK.E                             |                   |
|          |               |                                                       |       |                 |         | 1.1E-02 | K.VVISAPASGGAK.T                          |                   |
|          |               |                                                       |       |                 |         | 1.2E-02 | K.FKYNVTTTK.S                             |                   |
|          |               |                                                       |       |                 |         | 6.0E-04 | K.DDTLVVNGHR.I                            |                   |
|          |               |                                                       |       |                 |         | 4.2E-04 | R.KVVISAPASGGAK.T                         |                   |
|          |               |                                                       |       |                 |         | 1.1E-03 | K.AVGMVIPSTQGK.L                          |                   |
|          |               |                                                       |       |                 |         | 6.0E-04 | K.AVGMVIPSTQGK.L + Oxidation (M)          |                   |
|          |               |                                                       |       |                 |         | 5.2E-02 | K.TVDGVSVDWR.G                            |                   |
|          |               |                                                       |       |                 |         | 2.0E-06 | R.DTSIQEIDAALK.R                          |                   |
|          |               |                                                       |       |                 |         | 7.9E-06 | R.AAAVNIIPSTTGA.A                         |                   |
|          |               |                                                       |       |                 |         | 3.1E-07 | R.DTSIQEIDAALKR.A                         |                   |
|          |               |                                                       |       |                 |         | 1.1E-06 | K.LGVEYVIESTGLFTAK.A                      |                   |
|          |               |                                                       |       |                 |         | 1.2E-04 | K.SSPSVAKDDTLVVNGHR.I                     |                   |
|          |               |                                                       |       |                 |         | 1.2E-05 | R.VPTPDVSVVDLTF TAAR.D                    |                   |
|          |               |                                                       |       |                 |         | 4.4E-04 | K.IVSWYDNEWGYSHR.V                        |                   |
|          |               |                                                       |       |                 |         | 2.3E-02 | K.EGFGVQTGLMTTIHSYTATQK.T                 |                   |
|          |               |                                                       |       |                 |         |         | K.EGFGVQTGLMTTIHSYTATQK.T + Oxidation (M) |                   |
|          |               |                                                       |       |                 |         | 1.6E-02 | (M)                                       |                   |
|          | EAN90286.1    | glyceraldehyde 3-phosphate dehydrogenase,<br>putative | 39292 | 740             | 21      | 7.3E-03 | K.FKYTVTTTK.S                             | 1                 |
|          | EAN82665.1    | 60S ribosomal protein L4, putative                    | 41429 | 488             | 18      | 8.1E-02 | K.EAMAFLK.A                               | 0                 |
|          |               |                                                       |       |                 |         | 2.7E-01 | K.EAMAFLK.A + Oxidation (M)               |                   |
|          |               |                                                       |       |                 |         | 1.1E-03 | R.IMQSEEVRR.R + Oxidation (M)             |                   |
|          |               |                                                       |       |                 |         | 5.8E-01 | R.LRLNPFQK.K                              |                   |
|          |               |                                                       |       |                 |         | 8.5E-06 | K.AIGAVDDVNR.V                            |                   |
|          |               |                                                       |       |                 |         | 1.1E-02 | R.LTQPTNGFR.N                             |                   |
|          |               |                                                       |       |                 |         | 1.7E-03 | K.TKEAMAFLK.A                             |                   |
|          |               |                                                       |       |                 |         | 1.2E-05 | R.GPMLVMPDNK.G + 2 Oxidation (M)          |                   |
|          |               |                                                       |       |                 |         | 3.2E-01 | R.IMQSEEVRR.V                             |                   |
|          |               |                                                       |       |                 |         | 4.4E-01 | R.IMQSEEVRR.V + Oxidation (M)             |                   |
|          |               |                                                       |       |                 |         | 5.7E-02 | R.RGPMLVMPDNK.G + 2 Oxidation (M)         |                   |
|          |               |                                                       |       |                 |         | 6.9E-02 | R.HDIVQFVHTNMAK.N + Oxidation (M)         |                   |
|          |               |                                                       |       |                 |         | 9.3E-05 | K.AIGAVDDVNRVNSR.E                        |                   |
|          |               |                                                       |       |                 |         | 3.1E-05 | R.LSGMNHSAESWGTGR.A + Oxidation (M)       |                   |

| Band no.   | Accession no.                                          | Protein Identity | Mr    | Mascot<br>SCORE | # PEPT. | E-value | Sequence                                | Additional copies |
|------------|--------------------------------------------------------|------------------|-------|-----------------|---------|---------|-----------------------------------------|-------------------|
| 9 cont.    | EAN82665.1                                             | cont.            |       |                 |         | 2.2E-03 | K.GFMLPAPMLTNTDVTR.I + Oxidation (M)    |                   |
|            |                                                        |                  |       |                 |         | 1.5E-01 | K.GFMLPAPMLTNTDVTR.I + 2 Oxidation (M)  |                   |
|            |                                                        |                  |       |                 |         | 1.3E-03 | K.KGFMLPAPMLTNTDVTR.I + 2 Oxidation (M) |                   |
|            |                                                        |                  |       |                 |         | 3.1E-06 | K.IENVAEVPLVVEDAVQGYEK.T                |                   |
| EAN94839.1 | beta tubulin, putative                                 |                  | 50520 | 458             | 14      | 3.2E-01 | R.YLTASALFR.G                           | 0                 |
|            |                                                        |                  |       |                 |         | 2.6E-02 | K.LREEYPDR.I                            |                   |
|            |                                                        |                  |       |                 |         | 1.7E-06 | K.LAVNLVPPFR.L                          |                   |
|            |                                                        |                  |       |                 |         | 8.1E-03 | R.FPGQLNSDLR.K                          |                   |
|            |                                                        |                  |       |                 |         | 3.2E-02 | R.VGEQFTAMFR.R                          |                   |
|            |                                                        |                  |       |                 |         | 9.0E-06 | R.VGEQFTAMFR.R + Oxidation (M)          |                   |
|            |                                                        |                  |       |                 |         | 8.4E-07 | R.KLAVNLVPPFR.L                         |                   |
|            |                                                        |                  |       |                 |         | 1.1E-07 | R.INVYFDEATGGR.Y                        |                   |
|            |                                                        |                  |       |                 |         | 9.4E-04 | R.IMMTFSIIPSPK.V + 2 Oxidation (M)      |                   |
|            |                                                        |                  |       |                 |         | 1.6E-05 | K.EVDEQMLNVQNK.N                        |                   |
|            |                                                        |                  |       |                 |         | 5.2E-05 | K.EVDEQMLNVQNK.N + Oxidation (M)        |                   |
|            |                                                        |                  |       |                 |         | 1.3E-05 | R.AVLIDLEPGTMDSVR.A + Oxidation (M)     |                   |
|            |                                                        |                  |       |                 |         | 8.2E-01 | R.GLSVPELTQQMFDK.N + Oxidation (M)      |                   |
|            |                                                        |                  |       |                 |         | 3.2E-01 | R.LHFFMMGFAPLTSR.G + 2 Oxidation        |                   |
| EAN86462.1 | aspartate aminotransferase, mitochondrial,<br>putative |                  | 46511 | 399             | 11      | 6.9E-03 | K.NFGLYGLR.C                            | 0                 |
|            |                                                        |                  |       |                 |         | 1.6E-01 | K.GIDLPGMLK.S                           |                   |
|            |                                                        |                  |       |                 |         | 1.4E-02 | K.SLEAMPER.S + Oxidation (M)            |                   |
|            |                                                        |                  |       |                 |         | 5.4E-02 | K.GIDLPGMLK.S + Oxidation (M)           |                   |
|            |                                                        |                  |       |                 |         | 1.4E-03 | K.VNLAVGVYR.D                           |                   |
|            |                                                        |                  |       |                 |         | 6.7E-07 | R.VLSQYALLIR.T                          |                   |
|            |                                                        |                  |       |                 |         | 4.2E-02 | R.QIGMMSYTGLTK.E + Oxidation (M)        |                   |
|            |                                                        |                  |       |                 |         | 1.2E-04 | R.DDANRPFVLESVK.R                       |                   |
|            |                                                        |                  |       |                 |         | 8.2E-08 | R.AAISGLNSTNVSIVAK.A                    |                   |
|            |                                                        |                  |       |                 |         | 1.7E-05 | R.DDANRPFVLESVKR.S                      |                   |
|            |                                                        |                  |       |                 |         | 1.3E-05 | R.SDTGSDMEYAPINGMR.S + 2 Oxidation (M)  |                   |
| EAN87634.1 | 60S ribosomal protein L7a, putative                    |                  | 34671 | 295             | 8       | 4.9E-01 | R.LFDVATEK.K                            | 1                 |
|            |                                                        |                  |       |                 |         | 4.2E-03 | R.NAGKDAAAVM.- + Oxidation (M)          |                   |
|            |                                                        |                  |       |                 |         | 3.4E-03 | R.ANKVPYAIVK.D                          |                   |



| Band no. | Accession no. | Protein Identity                                            | Mr    | Mascot SCORE | # PEPT. | E-value | Sequence                                     | Additional copies |
|----------|---------------|-------------------------------------------------------------|-------|--------------|---------|---------|----------------------------------------------|-------------------|
| 9 cont.  | EAN87634.1    | cont.                                                       |       |              |         | 7.2E-04 | R.QWGGLQLSLR.S                               |                   |
|          |               |                                                             |       |              |         | 4.1E-03 | R.WPTFVTMQR.K + Oxidation (M)                |                   |
|          |               |                                                             |       |              |         | 7.3E-03 | K.NFGIGHDVPIYAR.D                            |                   |
|          |               |                                                             |       |              |         | 5.8E-10 | K.APLSVVTGLQEVTR.T                           |                   |
|          |               |                                                             |       |              |         | 3.4E-05 | K.KAPLSVVTGLQEVTR.T                          |                   |
|          | EAN83852.1    | heat shock 70 kDa protein, putative                         | 41044 | 243          | 8       | 2.3E-02 | R.GTLQPVER.V                                 | 0                 |
|          |               |                                                             |       |              |         | 1.1E-04 | R.VEIIANDQGNR.T                              |                   |
|          |               |                                                             |       |              |         | 7.5E-05 | K.DAGTIAGMEVLR.I                             |                   |
|          |               |                                                             |       |              |         | 8.7E-03 | K.DAGTIAGMEVLR.I + Oxidation (M)             |                   |
|          |               |                                                             |       |              |         | 5.7E-02 | R.AVHDVVLVGGSTR.I                            |                   |
|          |               |                                                             |       |              |         | 7.6E-04 | K.VMQLVSDFFGGK.E + Oxidation (M)             |                   |
|          |               |                                                             |       |              |         | 4.4E-04 | R.TTPSYVAFTDTER.L                            |                   |
|          |               |                                                             |       |              |         | 2.3E-04 | K.NQVAMNPTNTVFDAK.R + Oxidation              |                   |
|          | EAN82857.1    | elongation factor 1-alpha (EF-1-alpha), putative            | 48884 | 234          | 6       | 9.3E-04 | K.SVNFAQER.Y                                 | 5                 |
|          |               |                                                             |       |              |         | 8.7E-03 | R.LPLQDVYK.I                                 |                   |
|          |               |                                                             |       |              |         | 1.4E-06 | K.IGGIGTVPVGR.V                              |                   |
|          |               |                                                             |       |              |         | 6.5E-03 | K.STATGHLYK.C                                |                   |
|          |               |                                                             |       |              |         | 2.0E-05 | R.FIPISGWQGDNMIDK.S + Oxidation (M)          |                   |
|          |               |                                                             |       |              |         | 4.1E-03 | R.VETGTMKPGDVVTFAPANVTTEVK.S + Oxidation (M) |                   |
|          | EAN92220.1    | pyruvate dehydrogenase E1 component alpha subunit, putative | 43381 | 222          | 7       | 4.2E-05 | K.SDIQDVR.K                                  | 0                 |
|          |               |                                                             |       |              |         | 5.0E-02 | K.SDIQDVRK.T                                 |                   |
|          |               |                                                             |       |              |         | 4.9E-02 | R.TTQGTVYAKP.-                               |                   |
|          |               |                                                             |       |              |         | 1.5E-02 | R.AAYQPEMYR.R + Oxidation (M)                |                   |
|          |               |                                                             |       |              |         | 4.1E-03 | K.TIPINPQKPFK.L                              |                   |
|          |               |                                                             |       |              |         | 2.4E-03 | K.EVDQQLQPAEK.Q                              |                   |
|          |               |                                                             |       |              |         | 1.3E-05 | K.GPIVLEFDSYR.Y                              |                   |
|          | EAN99952.1    | hypothetical protein, conserved                             | 42578 | 220          | 7       | 4.8E-03 | K.IIQAPLR.S                                  | 0                 |
|          |               |                                                             |       |              |         | 1.7E-05 | R.ISLLYNAR.R                                 |                   |
|          |               |                                                             |       |              |         | 6.3E-05 | R.EVISMDALR.S + Oxidation (M)                |                   |
|          |               |                                                             |       |              |         | 5.5E-03 | K.AIAMLGTSPGVLPVR.E                          |                   |
|          |               |                                                             |       |              |         | 4.3E-04 | K.AIAMLGTSPGVLPVR.E + Oxidation (M)          |                   |
|          |               |                                                             |       |              |         | 6.7E-04 | R.SLPNPPSNSGADATER.H                         |                   |
|          |               |                                                             |       |              |         | 6.7E-03 | R.LELDSPHNTMLAQLR.E + Oxidation (M)          |                   |
|          | EAN86097.1    | fructose-bisphosphate aldolase, glycosomal, putative        | 41279 | 216          | 4       | 8.9E-05 | R.FNAETLAR.Y                                 | 2                 |
|          |               |                                                             |       |              |         | 5.0E-05 | K.IQNGTVSEAAVR.F                             |                   |
|          |               |                                                             |       |              |         | 2.2E-06 | K.ASTGETFVQLLQR.K                            |                   |

| Band no. | Accession no. | Protein Identity                                            | Mr     | Mascot SCORE | # PEPT. | E-value | Sequence                        | Additional copies |
|----------|---------------|-------------------------------------------------------------|--------|--------------|---------|---------|---------------------------------|-------------------|
| 9 cont.  | EAN86097.1    | cont.                                                       |        |              |         | 2.8E-06 | R.ATPGQVAQYTVSTLAR.V            |                   |
|          | EAO00025.1    | alcohol dehydrogenase, putative                             | 42442  | 200          | 4       | 3.2E-08 | K.NAAAAAIDAIR.A                 | 1                 |
|          |               |                                                             |        |              |         | 2.2E-04 | R.FAVITDEKR.H                   |                   |
|          |               |                                                             |        |              |         | 1.3E-02 | K.DIPALAESALK.D                 |                   |
|          |               |                                                             |        |              |         | 5.0E-06 | K.VSYLGVGALDSATSK.M             |                   |
|          |               | pyruvate dehydrogenase E1 component alpha subunit, putative | 22293  | 183          | 6       | 9.4E-02 | K.EVDQQLLPAEK.Q                 | 0                 |
|          | EAN93231.1    |                                                             |        |              |         | 3.2E-04 | K.EVLALQAR.I                    | 0                 |
|          | EAN97551.1    | hypothetical protein, conserved                             | 43296  | 180          | 7       | 2.5E-04 | K.EIDALLGGAEK.M                 |                   |
|          |               |                                                             |        |              |         | 7.7E-04 | R.NTSIAIEMIK.R + Oxidation (M)  |                   |
|          |               |                                                             |        |              |         | 1.1E-01 | R.AEQGLPSALLPK.N                |                   |
|          |               |                                                             |        |              |         | 2.2E-01 | R.LLKEVLALQAR.I                 |                   |
|          |               |                                                             |        |              |         | 2.2E-04 | K.WVVYTPPEDEVK.L                |                   |
|          | EAN80947.1    | tryparedoxin peroxidase, putative                           | 22886  | 179          | 5       | 4.1E-02 | R.DVDEALR.L                     | 3                 |
|          |               |                                                             |        |              |         | 1.1E-02 | K.AFQFVEK.H                     |                   |
|          |               |                                                             |        |              |         | 7.1E-04 | R.GLFIIDPK.Q                    |                   |
|          |               |                                                             |        |              |         | 3.6E-04 | R.QITVNDLPVGR.D                 |                   |
|          |               |                                                             |        |              |         | 1.1E-06 | R.GGLGQMNIPILADK.T + Oxidation  |                   |
|          | EAN90786.1    | RNA-binding protein, putative                               | 36346  | 168          | 4       | 2.1E-03 | R.NNEIGEVS.R                    | 0                 |
|          |               |                                                             |        |              |         | 1.2E-04 | R.VQALVQFDSK.V                  |                   |
|          |               |                                                             |        |              |         | 6.7E-05 | K.SAQQLVDFFR.Q                  |                   |
|          |               |                                                             |        |              |         | 6.9E-05 | R.QMNQALVEMESTK.S + 2 Oxidation |                   |
|          | EAN98352.1    | pyruvate phosphate dikinase, putative                       | 101833 | 163          | 4       | 2.3E-04 | R.SATGVAFSR.S                   | 1                 |
|          |               |                                                             |        |              |         | 3.4E-04 | K.GLPQEVVEQVK.A                 |                   |
|          |               |                                                             |        |              |         | 1.8E-04 | R.EMILADTLEGR.K                 |                   |
|          |               |                                                             |        |              |         | 1.3E-04 | R.TPQQIGQSLSLR.W                |                   |
|          | EAN91216.1    | protein disulfide isomerase, putative                       | 42060  | 159          | 4       | 4.1E-03 | K.VGVNDELSK.V                   | 0                 |
|          |               |                                                             |        |              |         | 3.9E-05 | R.NNILASLKDE.-                  |                   |
|          |               |                                                             |        |              |         | 8.0E-05 | K.NRLPSGDLSEK.V                 |                   |
|          |               |                                                             |        |              |         | 3.0E-03 | R.NFDAVVMDEAK.D + Oxidation     |                   |
|          | EAN92109.1    | hypothetical protein, conserved                             | 38049  | 156          | 4       | 1.8E-03 | K.FMIIAVPETVR.L + Oxidation (M) | 1                 |
|          |               |                                                             |        |              |         | 4.3E-04 | R.AALQSSIPLLSAR.Y               |                   |
|          |               |                                                             |        |              |         | 5.5E-04 | R.GQYVFTPSGSGVSK.N              |                   |
|          |               |                                                             |        |              |         | 1.3E-05 | R.ILYGPTYSSVTDR.L               |                   |
|          | EAN85055.1    | histone H4, putative                                        | 11177  | 146          | 3       | 3.9E-04 | R.ISGHIYDEVR.G                  | 7                 |
|          |               |                                                             |        |              |         | 4.9E-05 | R.DATAYTEYSR.K                  |                   |
|          |               |                                                             |        |              |         | 2.7E-06 | K.TVTAVDVVNALR.K                |                   |

| Band no. | Accession no. | Protein Identity                                                   | Mr     | Mascot |         | E-value                                    | Sequence                        | Additional copies |
|----------|---------------|--------------------------------------------------------------------|--------|--------|---------|--------------------------------------------|---------------------------------|-------------------|
|          |               |                                                                    |        | SCORE  | # PEPT. |                                            |                                 |                   |
| 9 cont.  | EAN95952.1    | hypothetical protein, conserved                                    | 43691  | 144    | 3       | 1.8E-04                                    | R.FVFTAIVLPR.F                  | 0                 |
|          |               |                                                                    |        |        |         | 7.9E-05                                    | K.IINLSAEIR.A                   |                   |
|          |               |                                                                    |        |        |         | 8.5E-06                                    | R.VIYLNLNNEPR.T                 |                   |
|          | EAN81533.1    | histone H4, putative                                               | 11163  | 143    | 3       | 7.4E-04                                    | R.ISGVYIDEVR.G                  | 10                |
|          | EAN84988.1    | hypothetical protein, conserved                                    | 43368  | 136    | 3       | 1.3E-05                                    | K.VGPWAIAGR.N                   | 1                 |
| 1.1E-04  |               |                                                                    |        |        |         | R.QGLGSEVAEVK.A                            |                                 |                   |
| 1.3E-04  |               |                                                                    |        |        |         | R.THYVDSTGEYNFVR.Q                         |                                 |                   |
|          | EAN81053.1    | alpha tubulin, putative                                            | 50549  | 128    | 6       | 9.0E-03                                    | R.LSVDYGKK.S                    | 0                 |
| 9.2E-05  |               |                                                                    |        |        |         | K.EDAANNYAR.G                              |                                 |                   |
| 2.2E-01  |               |                                                                    |        |        |         | R.QLFHPEQLISGK.E                           |                                 |                   |
| 3.7E-01  |               |                                                                    |        |        |         | R.TIQFVDWSPTGFK.C                          |                                 |                   |
| 1.1E-01  |               |                                                                    |        |        |         | R.NLDIERPTYTNLNR.L                         |                                 |                   |
| 2.0E-03  |               |                                                                    |        |        |         | K.AYHEQLSVSEISNAVFEPASMMTK.C + 2<br>Oxidat |                                 |                   |
|          | EAN98272.1    | eukaryotic initiation factor 4a, putative                          | 49984  | 120    | 3       | 2.3E-05                                    | R.VLVTDDLVAR.G                  | 1                 |
| 3.2E-03  |               |                                                                    |        |        |         | K.TGAFSIGLLQR.L                            |                                 |                   |
| 9.8E-05  |               |                                                                    |        |        |         | K.LQAGSIVAVGTPGR.V                         |                                 |                   |
|          | EAN89624.1    | oxidoreductase, putative                                           | 36790  | 112    | 2       | 4.5E-05                                    | K.VVLLAFMGGAK.V + Oxidation (M) | 0                 |
| 6.8E-07  |               |                                                                    |        |        |         | K.GSSEILGMEVSGVVEK.V + Oxidation           |                                 |                   |
|          | EAN83800.1    | D-isomer specific 2-hydroxyacid<br>dehydrogenase-protein, putative | 28659  | 112    | 2       | 9.5E-04                                    | R.FIGLVNEYAK.T                  | 1                 |
| 8.7E-08  |               |                                                                    |        |        |         | K.VGIIGYGDIGQASAK.L                        |                                 |                   |
|          | EAN81197.1    | hypothetical protein, conserved                                    | 30269  | 110    | 3       | 5.0E-05                                    | K.FSVDVEYAPR.C                  | 3                 |
| 3.6E-03  |               |                                                                    |        |        |         | K.LFVNPMATSDGK.F + Oxidation (M)           |                                 |                   |
| 1.3E-03  |               |                                                                    |        |        |         | R.SYTTSFVTPIPK.C                           |                                 |                   |
|          | EAN97019.1    | hypothetical protein, conserved                                    | 38819  | 107    | 4       | 3.5E-03                                    | K.AAVGLPFGGER.I                 | 1                 |
| 6.8E-01  |               |                                                                    |        |        |         | R.NAQNVMISSK.C + Oxidation (M)             |                                 |                   |
| 7.9E-05  |               |                                                                    |        |        |         | K.LVSYESMFR.G                              |                                 |                   |
| 2.8E-02  |               |                                                                    |        |        |         | K.GTSLSHGFTAVNSLKK.G                       |                                 |                   |
|          | EAN95492.1    | vacuolar-type Ca <sup>2+</sup> -ATPase, putative                   | 123386 | 92     | 2       | 1.2E-03                                    | R.LDELAGLIGR.F                  | 1                 |
| 3.1E-06  |               |                                                                    |        |        |         | R.QLMEENSAQPIAVIR.D + Oxidation            |                                 |                   |
|          | EAN82629.1    | heat shock protein 85, putative                                    | 81244  | 92     | 2       | 4.3E-05                                    | K.AELVNNLGTIAR.S                | 2                 |
| 1.6E-04  |               |                                                                    |        |        |         | R.GVVDSEDLPLNISR.E                         |                                 |                   |
|          | EAN83191.1    | eukaryotic translation initiation factor 5,<br>putative            | 43635  | 91     | 2       | 4.0E-04                                    | K.FFQSEIGAQR.T                  | 1                 |
| 3.0E-05  |               |                                                                    |        |        |         | R.VTGTALLDAATDEATK.S                       |                                 |                   |
|          | EAN82710.1    | glutamamyl carboxypeptidase, putative                              | 44359  | 88     | 5       | 1.3E+00                                    | R.ALPNETVSK.M                   | 3                 |
| 2.1E-02  |               |                                                                    |        |        |         | K.LVAFDTSR.N                               |                                 |                   |
| 1.8E-01  |               |                                                                    |        |        |         | R.EIAEYRR.N                                |                                 |                   |
| 2.0E-02  |               |                                                                    |        |        |         | R.SYVETQLLPAMK.A + Oxidation (M)           |                                 |                   |

| Band no. | Accession no. | Protein Identity                                         | Mr    | Mascot |         | E-value                                  | Sequence                                                                 | Additional copies |
|----------|---------------|----------------------------------------------------------|-------|--------|---------|------------------------------------------|--------------------------------------------------------------------------|-------------------|
|          |               |                                                          |       | SCORE  | # PEPT. |                                          |                                                                          |                   |
| 9 cont.  | EAN82710.1    | cont.                                                    |       |        |         | 5.4E-03                                  | K.ANLWATLPGDGGVTK.G                                                      |                   |
|          | EAN86484.1    | hypothetical protein, conserved                          | 50613 | 86     | 4       | 2.2E-03<br>4.7E-01<br>1.3E+00<br>2.1E-03 | R.AELNEAR.S<br>R.LYGETLR.G<br>R.ARAELNEAR.S<br>K.FDAAVLNSHGK.L           | 1                 |
|          | EAN85108.1    | hypothetical protein, conserved                          | 45955 | 85     | 2       | 1.5E-03<br>2.1E-05                       | R.VLAFSLR.S<br>R.AAFATPAEFK.V                                            | 1                 |
|          | EAN87049.1    | vacuolar ATP synthase, putative                          | 41526 | 81     | 2       | 5.7E-05<br>3.7E-04                       | R.FFSADGDFAR.D<br>R.TVLTF AANTMGMR.E + 2 Oxidation                       | 0                 |
|          | EAN95821.1    | fatty acid desaturase, putative                          | 47196 | 77     | 2       | 6.3E-02<br>1.3E-06                       | R.EIQEKIPVK.Y<br>R.EILGATYITDER.S                                        | 0                 |
|          | EAN88264.1    | histone H2A, putative                                    | 14345 | 69     | 3       | 3.0E-01<br>8.7E-04<br>1.1E-02            | R.GGVMPSLNK.A + Oxidation (M)<br>K.AGLIFPVGR.V<br>R.HDDDLGTLLK.D         | 3                 |
|          | EAN83816.1    | 60S ribosomal protein L5, putative                       | 34902 | 68     | 2       | 3.3E-03<br>1.1E-04                       | K.AILDVGLAR.T<br>R.DIIAQVVQAK.V                                          | 2                 |
|          | EAN83988.1    | fructose-1,6-bisphosphatase, cytosolic, putative         | 38159 | 68     | 2       | 2.6E-03<br>6.7E-04                       | R.LDVIANNAFK.A<br>R.LLYEAAPLAMLVEQAGGK.A + Oxidation                     | 1                 |
|          | EAN81547.1    | NAD(P)-dependent steroid dehydrogenase protein, putative | 26207 | 68     | 2       | 2.4E-03<br>9.2E-04                       | K.FYIVTDGR.T<br>R.DNLFLPNMLEAAGTGK.L + Oxidation                         | 0                 |
|          | EAN87340.1    | RNA-binding protein, putative                            | 50174 | 65     | 1       | 9.3E-07                                  | R.NIAENTTEQQLR.E                                                         | 1                 |
|          | EAN91740.1    | hypothetical protein, conserved                          | 40379 | 65     | 2       | 7.7E-03<br>1.4E-03                       | R.LVQNAYK.I<br>K.VAYIDPQR.V                                              | 0                 |
|          | EAN85330.1    | histone H2A, putative                                    | 14385 | 65     | 3       | 2.5E-02                                  | R.HDDDLGMLLK.D                                                           | 9                 |
|          | EAN84095.1    | hypothetical protein, conserved                          | 33996 | 64     | 2       | 1.6E-03<br>4.2E-03                       | R.WVAAEFAR.T<br>R.QEPFLGTLR.S                                            | 3                 |
|          | EAN95983.1    | ATPase beta subunit, putative                            | 55980 | 60     | 1       | 1.9E-06                                  | K.LADQAAEDTILTTGIK.V                                                     | 0                 |
|          | EAN85276.1    | hypothetical protein                                     | 52756 | 60     | 1       | 3.0E-06                                  | R.FADANEENVPAAQVNR.V                                                     | 1                 |
|          | EAN84918.1    | ATPase alpha subunit, putative                           | 24506 | 59     | 2       | 8.4E-02<br>1.6E-04                       | R.FVALFNQK.Q<br>R.VGSSAQNVAMK.G + Oxidation                              | 0                 |
|          | EAN82747.1    | Gim5A protein, putative                                  | 27268 | 58     | 1       | 1.1E-06                                  | R.LSLLLNALSSK.T                                                          | 2                 |
|          | EAN98983.1    | succinyl-CoA synthetase alpha subunit, putative          | 32274 | 53     | 1       | 1.4E-05                                  | R.SGTLTYEAVAQTTAK.S                                                      | 0                 |
|          | EAN95493.1    | hypothetical protein, conserved                          | 38907 | 51     | 3       | 2.1E-03<br>8.1E-01<br>1.0E-01            | R.EYVEFYTR.L<br>R.MGTLLQPMQR.M + 2 Oxidation (M)<br>R.DTVISEEFHLHDKEGR.M | 1                 |

| Band no. | Accession no. | Protein Identity                                             | Mr     | Mascot |         | E-value                       | Sequence                                                                 | Additional copies |
|----------|---------------|--------------------------------------------------------------|--------|--------|---------|-------------------------------|--------------------------------------------------------------------------|-------------------|
|          |               |                                                              |        | SCORE  | # PEPT. |                               |                                                                          |                   |
| 9 cont.  | EAN85190.1    | hypothetical protein, conserved                              | 43072  | 51     | 3       | 5.6E-04<br>1.1E+00<br>1.6E-01 | K.AAAALALIK.Q<br>K.ELEEDIR.M<br>M.PLPPLEEAPR.S                           | 1                 |
|          | EAN99001.1    | serine/threonine protein kinase, putative                    | 55378  | 48     | 2       | 1.8E-01<br>6.4E-04            | R.YRDVFVER.N<br>K.GSFAYVVLVR.R                                           | 0                 |
|          | EAN98359.1    | lanosterol 14-alpha-demethylase, putative                    | 55343  | 45     | 1       | 7.9E-06                       | K.ILGEIIVAR.E                                                            | 1                 |
|          | EAN92822.1    | ribosomal protein L3, putative                               | 48865  | 43     | 1       | 1.4E-04                       | K.SITPMGGFVGYGTVR.N + Oxidation                                          | 1                 |
|          | EAN81270.1    | sterol 24-c-methyltransferase, putative                      | 41138  | 42     | 1       | 1.9E-04                       | K.GAEILEEAAR.S                                                           | 1                 |
|          | EAN84370.1    | heat shock 70 kDa protein, mitochondrial precursor, putative | 71585  | 41     | 2       | 1.7E+00<br>4.8E-04            | R.SKFECLAEK.L<br>K.DAGTIAGLNVR.V                                         | 0                 |
|          | EAN81497.1    | retrotransposon hot spot (RHS) protein, putative             | 91127  | 41     | 3       | 2.6E-01<br>7.7E-02<br>3.6E-01 | R.LMVLTSK.G + Oxidation (M) not unique<br>R.VLIGTPGIGK.S<br>K.GYIYDVAK.K | 4                 |
|          | EAN89176.1    | NADH dehydrogenase, putative                                 | 56934  | 41     | 1       | 4.4E-05                       | K.LPLPTLAAVASR.Q                                                         | 1                 |
|          | EAN88252.1    | ribonucleoside-diphosphate reductase small chain, putative   | 39426  | 40     | 1       | 1.8E-04                       | R.LLVALGNER.H                                                            | 1                 |
|          | EAN81916.1    | ATP synthase, alpha chain, mitochondrial precursor, putative | 25912  | 40     | 1       | 1.4E-04                       | K.TSIAVSTIINQVR.I                                                        | 0                 |
|          | EAN89677.1    | hypothetical protein, conserved                              | 34143  | 39     | 1       | 3.0E-04                       | K.NGDLLVLSPTTR.H                                                         | 0                 |
|          | EAN90413.1    | ADP,ATP carrier protein 1, mitochondrial precursor, putative | 35303  | 38     | 1       | 4.1E-04                       | K.LLVQNQGEMIK.Q + Oxidation                                              | 1                 |
|          | EAN84604.1    | histone H3, putative                                         | 21714  | 38     | 1       | 5.9E-04                       | R.STDLLLQK.A                                                             | 7                 |
|          | EAN87271.1    | glycosomal membrane protein, putative                        | 24137  | 37     | 1       | 8.5E-04                       | K.SVSSSITDGR.S                                                           | 1                 |
|          | EAN97655.1    | chaperonin HSP60, mitochondrial precursor                    | 59991  | 37     | 2       | 4.8E-01<br>2.0E-03            | R.AVSAVATTLGPK.G<br>R.AVGVILQSVAEQSR.K                                   | 2                 |
|          | EAO00075.1    | cytochrome C oxidase subunit IV, putative                    | 39137  | 37     | 2       | 2.7E-02<br>7.6E-02            | R.ILDIYAR.A<br>R.TEEETAFK.S                                              | 1                 |
|          | EAN95757.1    | prostaglandin F2alpha synthase, putative                     | 14719  | 36     | 1       | 1.3E-03                       | K.FIANPDLVER.A                                                           | 1                 |
|          | EAN85971.1    | NADH-cytochrome B5 reductase, putative                       | 34825  | 33     | 1       | 2.1E-03                       | R.GPVGNFYLGK.G                                                           | 1                 |
|          | EAN98357.1    | pretranslocation protein, alpha subunit, putative            | 53952  | 32     | 2       | 1.2E-01<br>4.1E-02            | R.AVFEGIQK.I<br>K.DLGYGFLK.Q                                             | 1                 |
|          | EAN98716.1    | hypothetical protein, conserved                              | 125785 | 31     | 1       | 2.2E-03                       | K.NELDDIER.K                                                             | 0                 |
|          | EAN80688.1    | heat shock protein 70 (HSP70), putative                      | 15424  | 31     | 1       | 2.4E-03                       | K.DAGTIAGLNVR.I                                                          | 1                 |
|          | EAN97971.1    | hypothetical protein, conserved                              | 39401  | 31     | 1       | 1.4E-03                       | R.ELELQQNIIR.S                                                           | 0                 |
|          | EAN89722.1    | 60S ribosomal protein L34, putative                          | 19668  | 30     | 1       | 5.0E-03                       | R.AFLIEEQR.I                                                             | 3                 |
|          | EAN83495.1    | 40S ribosomal protein S3a, putative                          | 28554  | 30     | 1       | 4.7E-03                       | K.FVVQEVQGR.N                                                            | 4                 |

| Band no.   | Accession no.                    | Protein Identity                                             | Mr     | Mascot |         | E-value         | Sequence                         | Additional copies |
|------------|----------------------------------|--------------------------------------------------------------|--------|--------|---------|-----------------|----------------------------------|-------------------|
|            |                                  |                                                              |        | SCORE  | # PEPT. |                 |                                  |                   |
| 9 cont.    | EAN84364.1                       | nucleosome assembly protein-like protein, putative           | 51024  | 28     | 1       | 2.9E-03         | R.VVTPQEEK.S                     | 1                 |
|            | EAN81827.1                       | hypothetical protein, conserved                              | 39880  | 28     | 1       | 3.1E-03         | R.DAPLPVALEVPTR.D                | 1                 |
|            | EAN94487.1                       | 50S ribosomal protein L17, putative                          | 35432  | 28     | 1       | 2.3E-03         | R.ILADHVVDLAK.A                  | 0                 |
|            | EAN89399.1                       | nitrate reductase, putative                                  | 52680  | 27     | 1       | 5.8E-03         | K.LGEEVGEVFER.I                  | 0                 |
|            | EAN91887.1                       | mitochondrial DNA polymerase beta, putative                  | 45752  | 27     | 1       | 4.1E-03         | R.SVPTALLTFTGSK.N                | 1                 |
|            | EAN99050.1                       | phosphoglycerate kinase, putative                            | 100682 | 25     | 1       | 7.6E-03         | K.TLVFSQLENAAK.F                 | 0                 |
|            | EAN87059.1                       | hypothetical protein, conserved                              | 21263  | 24     | 2       | 2.2E+00         | K.HVPSSFLLK.D                    | 0                 |
|            |                                  |                                                              |        |        |         | 1.3E-02         | K.SVGLTAAALSPK.Q                 |                   |
|            | EAN87305.1                       | eukaryotic translation initiation factor 3 subunit, putative | 38050  | 24     | 2       | 4.8E-01         | R.EGDLLFSTAK.E                   | 1                 |
|            |                                  |                                                              |        |        |         | 6.5E-02         | R.GFASGAFDGLVK.L                 |                   |
|            | EAN83529.1                       | hypothetical protein, conserved                              | 93603  | 23     | 1       | 9.1E-03         | R.SSVLVVFGAK.K                   | 1                 |
|            | EAN87488.1                       | hypothetical protein, conserved                              | 38355  | 21     | 1       | 1.5E-02         | R.IPAQQPASK.-                    | 1                 |
|            | EAN97370.1                       | isopentenyl-diphosphate delta-isomerase, putative            | 19746  | 20     | 1       | 2.4E-02         | K.AALESPEP.V                     | 0                 |
|            | EAN87190.1                       | elongation factor 2, putative                                | 95336  | 20     | 1       | 3.5E-02         | K.SQANTLTLSVR.Q                  | 2                 |
| EAN88283.1 | hypothetical protein, conserved  | 46409                                                        | 18     | 1      | 2.6E-02 | R.TLLTTLSEHR.Q  | 0                                |                   |
| EAN97099.1 | hypothetical protein, conserved  | 34072                                                        | 18     | 1      | 3.1E-02 | R.AFLYEAQV.K    | 0                                |                   |
| EAN84096.1 | hypothetical protein, conserved  | 38584                                                        | 17     | 1      | 1.8E-02 | R.EAVLQDPLGLK.V | 3                                |                   |
| Band 10    | EAN99374.1                       | pyruvate phosphate dikinase, putative                        | 101851 | 714    | 23      | 6.2E-03         | K.LQSPDLK.G                      | 0                 |
|            |                                  |                                                              |        |        |         | 7.0E-02         | R.VAIDMVR.E                      |                   |
|            |                                  |                                                              |        |        |         | 1.1E-01         | R.VAIDMVR.E + Oxidation (M)      |                   |
|            |                                  |                                                              |        |        |         | 6.1E-03         | R.DDAGSFLR.H                     |                   |
|            |                                  |                                                              |        |        |         | 1.2E-04         | R.SATGVAFSR.S                    |                   |
|            |                                  |                                                              |        |        |         | 7.3E-03         | K.FDTDLTAK.D                     |                   |
|            |                                  |                                                              |        |        |         | 6.3E-03         | K.ATAEAWIR.R                     |                   |
|            |                                  |                                                              |        |        |         | 3.0E-03         | R.GDFLGIFR.T                     |                   |
|            |                                  |                                                              |        |        |         | 2.0E-03         | K.GLIYAGQLK.L                    |                   |
|            |                                  |                                                              |        |        |         | 1.7E-02         | R.GGMTSHAAVVAR.G + Oxidation (M) |                   |
|            |                                  |                                                              |        |        |         | 1.6E-02         | R.GTKFDTDLTAK.D                  |                   |
|            |                                  |                                                              |        |        |         | 9.8E-03         | R.EGDYITLDGSK.G                  |                   |
|            |                                  |                                                              |        |        |         | 7.6E-06         | K.TAEETLAAAGQR.V                 |                   |
|            |                                  |                                                              |        |        |         | 6.5E-04         | K.GLPQEVVEQVK.A                  |                   |
| 1.2E-02    | K.KFVYYFGGQK.A                   |                                                              |        |        |         |                 |                                  |                   |
| 2.6E-05    | R.EMILADTLEGR.K                  |                                                              |        |        |         |                 |                                  |                   |
| 2.4E-05    | R.EMILADTLEGR.K + Oxidation (M)  |                                                              |        |        |         |                 |                                  |                   |
| 2.9E-02    | K.VIPEIMIPLVGK.K + Oxidation (M) |                                                              |        |        |         |                 |                                  |                   |
| 2.2E-05    | R.TPQQIGQSLSLR.W                 |                                                              |        |        |         |                 |                                  |                   |

| Band no.   | Accession no.                   | Protein Identity | Mr  | Mascot SCORE | # PEPT. | E-value                            | Sequence                            | Additional copies |
|------------|---------------------------------|------------------|-----|--------------|---------|------------------------------------|-------------------------------------|-------------------|
| 10 cont.   | EAN99374.1                      | cont.            |     |              |         | 3.5E-02                            | K.SLHEMNPMGLGHR.G + 2 Oxidation (M) |                   |
|            |                                 |                  |     |              |         | 4.2E-04                            | R.VDYIVGTMIQVPR.A + Oxidation (M)   |                   |
|            |                                 |                  |     |              |         | 1.8E-07                            | R.LETSPEDLAGMDAAR.G + Oxidation (M) |                   |
|            |                                 |                  |     |              |         | 3.6E-05                            | R.RVEADMGTNFGDVENPLLFSVR.S + Oxidat |                   |
| EAN85190.1 | hypothetical protein, conserved | 43072            | 572 | 18           | 1.1E-04 | K.AAAALALIK.Q                      | 0                                   |                   |
|            |                                 |                  |     |              | 7.2E-04 | R.VSAYAPTR.K                       |                                     |                   |
|            |                                 |                  |     |              | 3.5E-04 | R.ADLVQLK.D                        |                                     |                   |
|            |                                 |                  |     |              | 4.3E-01 | K.AREEAELK.A                       |                                     |                   |
|            |                                 |                  |     |              | 1.0E-01 | R.RNYLVER.N                        |                                     |                   |
|            |                                 |                  |     |              | 3.0E-02 | K.DREEYLR.K                        |                                     |                   |
|            |                                 |                  |     |              | 5.8E-05 | R.VSAYAPTRK.E                      |                                     |                   |
|            |                                 |                  |     |              | 5.0E-05 | K.ELEEDIR.M                        |                                     |                   |
|            |                                 |                  |     |              | 4.7E-03 | K.AEFEETIEK.Q                      |                                     |                   |
|            |                                 |                  |     |              | 2.1E-02 | M.PLPPLEAPR.S                      |                                     |                   |
|            |                                 |                  |     |              | 1.5E-03 | K.IVKEEAQLK.A                      |                                     |                   |
|            |                                 |                  |     |              | 1.6E-04 | K.AYSSLVESNK.E                     |                                     |                   |
|            |                                 |                  |     |              | 6.7E-06 | K.AILEYNATLAER.E                   |                                     |                   |
|            |                                 |                  |     |              | 1.2E-04 | R.EREEYELSLIR.T                    |                                     |                   |
|            |                                 |                  |     |              | 2.9E-01 | R.IHNYDEPPESIR.E                   |                                     |                   |
|            |                                 |                  |     |              | 8.3E-03 | R.EKQEWQLTHIDGV.-                  |                                     |                   |
|            |                                 |                  |     |              | 1.3E-02 | R.DQYKAEFEETIEK.Q                  |                                     |                   |
|            |                                 |                  |     |              | 2.9E-02 | K.SQSMYNPDLTRPLPGGPR.S + Oxidation |                                     |                   |
| EAN88063.1 | hypothetical protein, conserved | 43064            | 562 | 18           | 5.3E-02 | R.VSAYAPTRR.E                      | 0                                   |                   |
|            |                                 |                  |     |              | 3.1E-03 | K.AYVSSLVESNK.E                    |                                     |                   |
|            |                                 |                  |     |              | 3.8E-04 | K.AYVSSLVESNKEQAR.K                |                                     |                   |
| EAN95952.1 | hypothetical protein, conserved | 43691            | 514 | 13           | 3.5E-06 | K.VIANLLNR.-                       | 0                                   |                   |
|            |                                 |                  |     |              | 6.5E-05 | R.FVFTAVLPR.F                      |                                     |                   |
|            |                                 |                  |     |              | 6.9E-03 | R.LIFLYPMSK.L                      |                                     |                   |
|            |                                 |                  |     |              | 4.1E-02 | R.LIFLYPMSK.L + Oxidation (M)      |                                     |                   |
|            |                                 |                  |     |              | 6.1E-06 | K.IINLSAEEIR.A                     |                                     |                   |
|            |                                 |                  |     |              | 1.7E-05 | K.RFVFTAVLPR.F                     |                                     |                   |
|            |                                 |                  |     |              | 6.5E-04 | R.RLIFLYPMSK.L                     |                                     |                   |
|            |                                 |                  |     |              | 9.3E-02 | R.RLIFLYPMSK.L + Oxidation (M)     |                                     |                   |
|            |                                 |                  |     |              | 4.6E-04 | K.KIINLSAEEIR.A                    |                                     |                   |
|            |                                 |                  |     |              | 3.2E-06 | R.VIYLNLNNEPR.T                    |                                     |                   |
|            |                                 |                  |     |              | 1.3E-06 | K.SEEPSGLELVDLR.D                  |                                     |                   |
|            |                                 |                  |     |              | 8.4E-07 | R.NYQILEEWYGR.E                    |                                     |                   |
|            |                                 |                  |     |              | 2.4E-03 | K.LLDVVCSPELNIPK.E                 |                                     |                   |

| Band no.   | Accession no.                         | Protein Identity       | Mr    | Mascot<br>SCORE | # PEPT. | E-value                            | Sequence                            | Additional copies |
|------------|---------------------------------------|------------------------|-------|-----------------|---------|------------------------------------|-------------------------------------|-------------------|
| 10 cont.   | EAN94839.1                            | beta tubulin, putative | 50520 | 486             | 17      | 1.4E-01                            | R.YLTASALFR.G                       | 0                 |
|            |                                       |                        |       |                 |         | 8.9E-03                            | K.NMMQAADPR.H + Oxidation (M)       |                   |
|            |                                       |                        |       |                 |         | 2.3E-02                            | K.NMMQAADPR.H + 2 Oxidation (M)     |                   |
|            |                                       |                        |       |                 |         | 7.5E-02                            | K.LREEYPDR.I                        |                   |
|            |                                       |                        |       |                 |         | 2.8E-05                            | K.LAVNLVPFPR.L                      |                   |
|            |                                       |                        |       |                 |         | 4.0E-03                            | R.FPGQLNSDLR.K                      |                   |
|            |                                       |                        |       |                 |         | 5.8E-05                            | R.VGEQFTAMFR.R                      |                   |
|            |                                       |                        |       |                 |         | 5.8E-06                            | R.VGEQFTAMFR.R + Oxidation (M)      |                   |
|            |                                       |                        |       |                 |         | 4.6E-05                            | R.KLAVNLVPFPR.L                     |                   |
|            |                                       |                        |       |                 |         | 5.0E-08                            | R.INVYFDEATGGR.Y                    |                   |
|            |                                       |                        |       |                 |         | 3.8E-04                            | R.IMMTFSIIPSPK.V + Oxidation (M)    |                   |
|            |                                       |                        |       |                 |         | 4.8E-04                            | R.IMMTFSIIPSPK.V + 2 Oxidation (M)  |                   |
|            |                                       |                        |       |                 |         | 1.4E-04                            | K.EVDEQMLNVQNK.N                    |                   |
|            |                                       |                        |       |                 |         | 9.1E-06                            | K.EVDEQMLNVQNK.N + Oxidation (M)    |                   |
|            |                                       |                        |       |                 |         | 2.6E-06                            | R.AVLIDLEPGTMDSVR.A                 |                   |
|            |                                       |                        |       |                 |         | 1.9E-04                            | R.AVLIDLEPGTMDSVR.A + Oxidation (M) |                   |
|            |                                       |                        |       |                 |         | 1.9E-04                            | R.GLSVPELTQMFDAK.N + Oxidation (M)  |                   |
| EAN94612.1 | hexokinase, putative                  | 52802                  | 448   | 15              | 1.9E-01 | K.DVVELLQK.A                       | 0                                   |                   |
|            |                                       |                        |       |                 | 1.4E-04 | R.MPGLQFTR.Q                       |                                     |                   |
|            |                                       |                        |       |                 | 2.9E-03 | R.MPGLQFTR.Q + Oxidation (M)       |                                     |                   |
|            |                                       |                        |       |                 | 9.3E-03 | K.GVDHGFLIK.W                      |                                     |                   |
|            |                                       |                        |       |                 | 1.2E+00 | R.MLPSYVYK.T                       |                                     |                   |
|            |                                       |                        |       |                 | 6.9E-01 | R.MLPSYVYK.T + Oxidation (M)       |                                     |                   |
|            |                                       |                        |       |                 | 2.5E-05 | K.FMGMISADR.M + 2 Oxidation (M)    |                                     |                   |
|            |                                       |                        |       |                 | 6.3E-04 | R.ATVAIDGSVFEK.T                   |                                     |                   |
|            |                                       |                        |       |                 | 7.5E-02 | R.LNNLLQHIAVK.D                    |                                     |                   |
|            |                                       |                        |       |                 | 1.9E-04 | K.MVSGMYLGEISR.R                   |                                     |                   |
|            |                                       |                        |       |                 | 2.2E-05 | K.MVSGMYLGEISR.R + 2 Oxidation (M) |                                     |                   |
|            |                                       |                        |       |                 | 3.1E-03 | R.GVEGKDVVELLQK.A                  |                                     |                   |
|            |                                       |                        |       |                 | 1.5E-03 | R.TVPLGFTFSFPTEQK.G                |                                     |                   |
|            |                                       |                        |       |                 | 1.1E-08 | K.ATGVFYALDLGGTNFR.V               |                                     |                   |
| 3.8E-08    | K.FVLPVTAYDEAMDAVTPNR.N + Oxidation   |                        |       |                 |         |                                    |                                     |                   |
| EAN82710.1 | glutamamyl carboxypeptidase, putative | 44359                  | 425   | 14              | 1.9E-01 | R.ALPNETVSK.M                      | 0                                   |                   |
|            |                                       |                        |       |                 | 2.6E-02 | K.DYLEGLGVK.C                      |                                     |                   |
|            |                                       |                        |       |                 | 2.1E-04 | K.LVAFDTSR.N                       |                                     |                   |
|            |                                       |                        |       |                 | 2.0E-02 | K.LREIAEEYR.R                      |                                     |                   |
|            |                                       |                        |       |                 | 2.6E-04 | R.SMDHTQWLAK.L                     |                                     |                   |
|            |                                       |                        |       |                 | 4.7E-03 | R.SMDHTQWLAK.L + Oxidation (M)     |                                     |                   |



| Band no.   | Accession no.                                       | Protein Identity | Mr    | Mascot<br>SCORE | # PEPT. | E-value | Sequence                                        | Additional copies |
|------------|-----------------------------------------------------|------------------|-------|-----------------|---------|---------|-------------------------------------------------|-------------------|
| 10 cont.   | EAN82710.1                                          | cont.            |       |                 |         | 5.8E-05 | K.WSDSPFTLTER.D                                 |                   |
|            |                                                     |                  |       |                 |         | 3.0E-05 | R.SYVETQLLPAMK.A                                |                   |
|            |                                                     |                  |       |                 |         | 9.9E-02 | R.SYVETQLLPAMK.A + Oxidation (M)                |                   |
|            |                                                     |                  |       |                 |         | 2.4E-02 | K.AEFEDAEIVITPR.D                               |                   |
|            |                                                     |                  |       |                 |         | 8.6E-04 | K.ANLWATLPGDGGVTK.G                             |                   |
|            |                                                     |                  |       |                 |         | 3.0E-05 | R.DETPSFEGSEEAPITK.L                            |                   |
|            |                                                     |                  |       |                 |         | 2.4E-05 | K.GGILSGHTDVPVVDGQK.W                           |                   |
|            |                                                     |                  |       |                 |         | 9.7E-04 | R.AEGCIIGEPTGMTVVIAHK.G + Oxidation             |                   |
| EAN87141.1 | hexokinase, putative                                |                  | 52750 | 425             | 15      | 1.7E-01 | K.GVDNGFLIK.W                                   | 0                 |
|            |                                                     |                  |       |                 |         | 2.9E-01 | R.MIAHLAELR.C + Oxidation                       |                   |
|            |                                                     |                  |       |                 |         | 1.5E-02 | K.DVVELLQNALKR.M                                |                   |
| EAN85498.1 | glutamamyl carboxypeptidase, putative               |                  | 44258 | 424             | 15      | 2.6E-05 | R.NETPSFEGSEEAPFTK.L                            | 0                 |
| EAN85497.1 | glutamamyl carboxypeptidase, putative               |                  | 44390 | 419             | 14      | 6.9E-05 | R.DETPSFEGSEEAPFTK.L                            | 0                 |
| EAN82857.1 | elongation factor 1-alpha (EF-1-alpha),<br>putative |                  | 48884 | 351             | 11      | 5.6E-04 | K.VGYNVEK.V                                     | 4                 |
|            |                                                     |                  |       |                 |         | 1.9E-02 | K.FAEIESK.I                                     |                   |
|            |                                                     |                  |       |                 |         | 1.3E-02 | K.YAWVLDK.L                                     |                   |
|            |                                                     |                  |       |                 |         | 3.6E-01 | R.TIEKFEK.E                                     |                   |
|            |                                                     |                  |       |                 |         | 3.8E-03 | R.QTVAVGIK.A                                    |                   |
|            |                                                     |                  |       |                 |         | 4.2E-03 | K.SVNFAQER.Y                                    |                   |
|            |                                                     |                  |       |                 |         | 1.8E-03 | R.LPLQDVYK.I                                    |                   |
|            |                                                     |                  |       |                 |         | 1.8E-05 | K.IGGIGTVPVGR.V                                 |                   |
|            |                                                     |                  |       |                 |         | 2.8E-02 | K.STATGHLYK.C                                   |                   |
|            |                                                     |                  |       |                 |         | 8.5E-07 | R.FIPISGWQGDNMIDK.S + Oxidation (M)             |                   |
|            |                                                     |                  |       |                 |         |         | R.VETGTMKPGDVVTFAPANVTTEVK.S +<br>Oxidation (M) |                   |
| EAN91887.1 | mitochondrial DNA polymerase beta, putative         |                  | 45752 | 329             | 8       | 1.5E-02 | K.LGSPEEVK.A                                    | 1                 |
|            |                                                     |                  |       |                 |         | 1.9E-05 | K.TNLDLPLR.T                                    |                   |
|            |                                                     |                  |       |                 |         | 1.1E-02 | R.IQLTDQQR.V                                    |                   |
|            |                                                     |                  |       |                 |         | 8.2E-05 | K.GYLLNEYGLFK.L                                 |                   |
|            |                                                     |                  |       |                 |         | 3.7E-06 | R.SVPTALLTFTGSK.N                               |                   |
|            |                                                     |                  |       |                 |         | 4.7E-05 | R.EGIFTVEELIEK.A                                |                   |
|            |                                                     |                  |       |                 |         | 4.9E-06 | R.NYLEATMAQGPK.Y + Oxidation (M)                |                   |
|            |                                                     |                  |       |                 |         | 6.6E-02 | K.AIQELTQVHGFGR.A                               |                   |
| EAN81053.1 | alpha tubulin, putative                             |                  | 50549 | 303             | 8       | 2.9E-02 | R.LSVDYGKK.S                                    | 0                 |
|            |                                                     |                  |       |                 |         | 8.3E-01 | K.DVNAAVATIK.T                                  |                   |
|            |                                                     |                  |       |                 |         | 3.6E-02 | R.QLFHPEQLISGK.E                                |                   |
|            |                                                     |                  |       |                 |         | 1.2E-05 | R.TIQFVDWSPTGFK.C                               |                   |
|            |                                                     |                  |       |                 |         | 4.8E-07 | R.AVFLDLEPTVVDEIR.T                             |                   |

| Band no. | Accession no. | Protein Identity                                   | Mr    | Mascot<br>SCORE | # PEPT. | E-value | Sequence                               | Additional copies |
|----------|---------------|----------------------------------------------------|-------|-----------------|---------|---------|----------------------------------------|-------------------|
| 10 cont. | EAN81053.1    | cont.                                              |       |                 |         | 7.0E-03 | R.NLDIERPTYTNLNR.L                     |                   |
|          |               |                                                    |       |                 |         | 4.0E-07 | R.IHFVLTSYAPVISAEEK.A                  |                   |
|          |               |                                                    |       |                 |         |         | K.AYHEQLSVSEISNAVFEPAASMMTK.C + 2      |                   |
|          |               |                                                    |       |                 |         | 5.0E-05 | Oxidation (M)                          |                   |
|          | EAN95886.1    | heat shock protein 70 (HSP70), putative            | 71171 | 293             | 8       | 7.4E-02 | R.NQIVITNDK.G                          | 1                 |
|          |               |                                                    |       |                 |         | 2.8E-03 | K.DAGTIAGMEVLR.I                       |                   |
|          |               |                                                    |       |                 |         | 2.8E-04 | R.AVHDVVLVGGSTR.I                      |                   |
|          |               |                                                    |       |                 |         | 1.2E-04 | K.VMQLVSDFFGGK.E                       |                   |
|          |               |                                                    |       |                 |         | 3.6E-04 | K.VMQLVSDFFGGK.E + Oxidation (M)       |                   |
|          |               |                                                    |       |                 |         | 2.4E-05 | R.TTPSYVAFTDTER.L                      |                   |
|          |               |                                                    |       |                 |         | 5.6E-03 | K.TFNPEEVSSMVLSK.M + Oxidation (M)     |                   |
|          |               |                                                    |       |                 |         | 2.4E-08 | K.NQVAMNPTNTVFDK.R + Oxidation         |                   |
|          | EAN96060.1    | glutamamyl carboxypeptidase, putative              | 44531 | 274             | 10      | 2.6E-02 | K.DYLEGLGVK.C only shared              | 0                 |
|          |               |                                                    |       |                 |         | 2.0E-02 | K.LVSFDTTSR.N                          |                   |
|          |               |                                                    |       |                 |         | 1.0E-02 | K.INEIAENIK.F                          |                   |
|          |               |                                                    |       |                 |         | 1.8E-01 | K.AIQGDGAVARPHL.-                      |                   |
|          |               |                                                    |       |                 |         | 7.2E-06 | K.AYVNDTLLPSMK.K                       |                   |
|          |               |                                                    |       |                 |         | 4.2E-04 | K.WNSDPFTLTER.D                        |                   |
|          |               |                                                    |       |                 |         | 5.8E-04 | K.AYVNDTLLPSMK.K + Oxidation (M)       |                   |
|          |               |                                                    |       |                 |         | 5.4E-02 | K.AYVNDTLLPSMKK.A + Oxidation (M)      |                   |
|          |               |                                                    |       |                 |         | 3.7E-04 | K.DANEKDPFTLLMR.Q + Oxidation (M)      |                   |
|          |               |                                                    |       |                 |         | 1.7E-04 | R.YLPEAEAEKFEER.I                      |                   |
|          | EAN84918.1    | ATPase alpha subunit, putative                     | 24506 | 243             | 9       | 2.0E-01 | K.GILAEYRK.L                           | 0                 |
|          |               |                                                    |       |                 |         | 7.0E-04 | R.FVALFNQK.Q                           |                   |
|          |               |                                                    |       |                 |         | 1.8E-01 | K.DLSIMYGSAK.N                         |                   |
|          |               |                                                    |       |                 |         | 4.8E-04 | K.DLSIMYGSAK.N + Oxidation (M)         |                   |
|          |               |                                                    |       |                 |         | 2.0E-06 | R.VGSSAQNVAMK.G + Oxidation (M)        |                   |
|          |               |                                                    |       |                 |         | 2.6E-03 | K.FYEYLLVHK.D                          |                   |
|          |               |                                                    |       |                 |         | 1.4E-02 | K.QHTQLFLQHYQSK.M                      |                   |
|          |               |                                                    |       |                 |         | 1.7E-04 | K.LAADSVGGQQVQTIPMIR.G                 |                   |
|          |               |                                                    |       |                 |         | 8.6E-05 | K.LAADSVGGQQVQTIPMIR.G + Oxidation (M) |                   |
|          | EAN90286.1    | glyceraldehyde 3-phosphate dehydrogenase, putative | 39292 | 233             | 7       | 1.1E-01 | K.LTGMSFR.V + Oxidation (M)            | 3                 |
|          |               |                                                    |       |                 |         | 1.0E-03 | R.NPADLPWGK.L                          |                   |
|          |               |                                                    |       |                 |         | 2.7E-03 | K.ATLQNNLPK.E                          |                   |
|          |               |                                                    |       |                 |         | 1.1E-03 | K.AVGMVIPSTQGK.L + Oxidation (M)       |                   |
|          |               |                                                    |       |                 |         | 3.8E-04 | R.AAAVNIPSTTGA.A                       |                   |
|          |               |                                                    |       |                 |         | 3.5E-03 | R.DTSIQEIDAALKR.A                      |                   |
|          |               |                                                    |       |                 |         | 7.8E-06 | R.VPTPDVSVVDLTFTAAR.D                  |                   |

| Band no. | Accession no. | Protein Identity                                             | Mr    | Mascot |         | E-value                                                                                         | Sequence                                                                                                                                                                      | Additional copies |
|----------|---------------|--------------------------------------------------------------|-------|--------|---------|-------------------------------------------------------------------------------------------------|-------------------------------------------------------------------------------------------------------------------------------------------------------------------------------|-------------------|
|          |               |                                                              |       | SCORE  | # PEPT. |                                                                                                 |                                                                                                                                                                               |                   |
| 10 cont. | EAO00202.1    | 6-phospho-1-fructokinase, putative                           | 54100 | 229    | 6       | 8.0E-02<br>8.7E-05<br>1.8E-03<br>1.9E-07<br>2.6E-03<br>8.4E-05                                  | R.FGYWGLSK.K<br>R.ELEAISLVR.E<br>R.TFGFETAVDK.A<br>R.SLTLTAVNAYR.V<br>R.YNSYILVPIK.V<br>R.GPQDTSEMVDTLER.L + Oxidation (M)                                                    | 0                 |
|          | EAN81916.1    | ATP synthase, alpha chain, mitochondrial precursor, putative | 25912 | 224    | 6       | 1.2E-03<br>2.7E-04<br>8.5E-06<br>4.7E-03<br>3.3E-05<br>7.2E-06                                  | R.INQQILSK.D<br>K.AVDTMIPIGR.G<br>K.AVDTMIPIGR.G + Oxidation (M)<br>K.VDTGAPNIVSR.S<br>R.SPVNYNLLTGFK.A<br>K.TSIAVSTIINQVR.I                                                  | 0                 |
|          | EAN97655.1    | chaperonin HSP60, mitochondrial precursor                    | 59991 | 223    | 4       | 6.0E-05<br>1.5E-07<br>8.5E-08<br>3.6E-04                                                        | R.GYISPYFVTDK.A<br>K.AELEDAPVLSAK.K<br>R.AVGVILQSVAEQSR.K<br>R.AAVQEGIVPGGGVALLR.A                                                                                            | 1                 |
|          | EAN98272.1    | eukaryotic initiation factor 4a, putative                    | 49984 | 220    | 5       | 6.6E-04<br>4.8E-06<br>2.7E-06<br>7.0E-06<br>3.8E-02                                             | R.VLVTDLVAR.G<br>K.TGAFSIGLLQR.L<br>R.GGDIIAQAQSGTGK.T<br>R.ELALQTAEVITR.I<br>R.HNVLQGLVLSPTRE                                                                                | 1                 |
|          | EAN86150.1    | hypothetical protein, conserved                              | 47419 | 202    | 9       | 1.2E-02<br>1.4E+00<br>2.4E-02<br>5.5E-02<br>5.0E-02<br>6.3E-02<br>5.9E-04<br>2.6E-05<br>3.2E-02 | R.EQLMER.V + Oxidation (M)<br>R.FLAPYDK.N<br>K.AASSADPVKTG.-<br>R.AWDDLFEK.N<br>K.EVSQEEIAK.L<br>R.SIPSYLTDTK.W<br>R.HAADMYDGFIF.F<br>K.QTQEAVDIWLR.I<br>K.DFVEQSETFSPDYHKR.F | 0                 |
|          | EAN87966.1    | glucose-regulated protein 78, putative                       | 71414 | 201    | 3       | 1.5E-05<br>5.8E-08<br>1.4E-07                                                                   | K.DAGTIAGLNVVR.I<br>R.ITPSVVAFTETER.L<br>R.IINEPTAAAIA YGLNK.A                                                                                                                | 0                 |
|          | EAN88964.1    | glycosomal phosphoenolpyruvate carboxykinase, putative       | 59404 | 200    | 5       | 8.5E-04<br>2.9E-04<br>1.1E+00<br>2.2E-05                                                        | K.LSEESFAR.V<br>K.TTLSADPHR.N<br>K.IAKEFLDTR.E<br>K.TEKDIYDAVR.F                                                                                                              | 1                 |

| Band no. | Accession no. | Protein Identity                                       | Mr    | Mascot SCORE | # PEPT. | E-value | Sequence                               | Additional copies |
|----------|---------------|--------------------------------------------------------|-------|--------------|---------|---------|----------------------------------------|-------------------|
| 10 cont. | EAN88964.1    | cont.                                                  |       |              |         | 8.1E-07 | K.NVIFLTNDAFGVMPPVAR.L + Oxidation (M) |                   |
|          | EAN95983.1    | ATPase beta subunit, putative                          | 55980 | 198          | 4       | 1.5E-03 | K.IGLFGGAGVVGK.T                       | 0                 |
|          |               |                                                        |       |              |         | 2.6E-06 | R.IFNVLGDAIDQR.G                       |                   |
|          |               |                                                        |       |              |         | 7.0E-08 | R.FTQANSEVSALLGR.I                     |                   |
|          |               |                                                        |       |              |         | 5.7E-03 | R.VAQSALTMAEYFR.D + Oxidation          |                   |
|          | EAN89176.1    | NADH dehydrogenase, putative                           | 56934 | 197          | 5       | 3.7E-02 | K.GAVVAVNNK.E                          | 1                 |
|          |               |                                                        |       |              |         | 1.7E-06 | K.LANLQVLSVR.N                         |                   |
|          |               |                                                        |       |              |         | 1.3E-02 | R.IQPALATLPNR.F                        |                   |
|          |               |                                                        |       |              |         | 1.5E-07 | K.LPLPTLAAVASR.Q                       |                   |
|          |               |                                                        |       |              |         | 3.6E-04 | R.DTTFIGDLSedr.V                       |                   |
|          | EAN96732.1    | succinyl-CoA ligase [GDP-forming] beta-chain, putative | 46089 | 195          | 4       | 3.2E-06 | R.TLEEVEAALGK.I                        | 0                 |
|          |               |                                                        |       |              |         | 2.9E-06 | K.LSFDDNAEFR.Q                         |                   |
|          |               |                                                        |       |              |         | 1.0E-03 | R.ILQESGLPLHPAR.N                      |                   |
|          |               |                                                        |       |              |         | 5.0E-05 | K.EQIVAAFQIITGDEK.V                    |                   |
|          | EAN86097.1    | fructose-bisphosphate aldolase, glycosomal, putative   | 41279 | 192          | 5       | 5.7E-04 | R.FNAETLAR.Y                           | 2                 |
|          |               |                                                        |       |              |         | 4.0E-06 | K.IQNGTVSEAAVR.F                       |                   |
|          |               |                                                        |       |              |         | 6.0E-06 | K.ASTGETFVQLQR.K                       |                   |
|          |               |                                                        |       |              |         | 4.1E-01 | R.FAPLGLSNTEEHR.R.Q                    |                   |
|          |               |                                                        |       |              |         | 2.1E-03 | R.ATPGQVAQYTVSTLAR.V                   |                   |
|          | EAN92280.1    | ATP-dependent DEAD/H RNA helicase, putative            | 47149 | 191          | 5       | 3.8E-02 | R.VVDLASKR.T                           | 0                 |
|          |               |                                                        |       |              |         | 1.1E-02 | K.YAETYLHR.I                           |                   |
|          |               |                                                        |       |              |         | 8.9E-07 | R.ELALQTAQVTK.E                        |                   |
|          |               |                                                        |       |              |         | 5.3E-04 | K.TASFVIPVLEK.V                        |                   |
|          |               |                                                        |       |              |         | 2.1E-05 | R.QSLLFSATFPVTVK.D                     |                   |
|          | EAN88162.1    | hypothetical protein, conserved                        | 39057 | 187          | 6       | 1.6E-03 | K.SNSTIVGR.R                           | 0                 |
|          |               |                                                        |       |              |         | 2.3E-04 | R.ATDVVNQR.N                           |                   |
|          |               |                                                        |       |              |         | 4.8E-02 | R.TFAPQLLYK.E                          |                   |
|          |               |                                                        |       |              |         | 2.1E-04 | R.MEEINTTSTR.D + Oxidation (M)         |                   |
|          |               |                                                        |       |              |         | 8.1E-04 | R.DALDVIEEANKK.S                       |                   |
|          |               |                                                        |       |              |         | 1.1E-02 | R.LFPLLKPLVDER.G                       |                   |
|          | EAN88387.1    | hypothetical protein, conserved                        | 39017 | 180          | 5       | 3.6E-05 | R.IEEINTTSTR.D                         | 0                 |
|          | EAN86269.1    | 60S ribosomal protein L19, putative                    | 37755 | 175          | 5       | 4.4E-03 | R.EDAAAAAAAK.Q                         | 3                 |
|          |               |                                                        |       |              |         | 2.9E-03 | R.QLAEQLAAK.R                          |                   |
|          |               |                                                        |       |              |         | 8.9E-01 | R.NLMEHIHK.V + Oxidation (M)           |                   |
|          |               |                                                        |       |              |         | 2.7E-03 | R.REDAAAAAAAK.Q                        |                   |
|          |               |                                                        |       |              |         | 3.4E-07 | R.VWLDPNASEISNANSR.K                   |                   |

| Band no. | Accession no. | Protein Identity                                             | Mr    | Mascot |         | E-value                                             | Sequence                                                                                               | Additional copies |
|----------|---------------|--------------------------------------------------------------|-------|--------|---------|-----------------------------------------------------|--------------------------------------------------------------------------------------------------------|-------------------|
|          |               |                                                              |       | SCORE  | # PEPT. |                                                     |                                                                                                        |                   |
| 10 cont. | EAN89593.1    | hypothetical protein, conserved                              | 52619 | 162    | 4       | 9.8E-04<br>2.4E-01<br>4.3E-05<br>7.3E-07            | R.DADLSLPGR.S<br>R.HIDASLLSR.L<br>R.VQTALSMLVLMR.Q + 2 Oxidation (M)<br>R.FADANEENVPAQVNR.V            | 0                 |
|          | EAN87378.1    | 3-hydroxy-3-methylglutaryl-CoA reductase, putative           | 46865 | 128    | 4       | 6.6E-04<br>5.3E-03<br>2.1E-02<br>3.5E-05            | K.TLLLGEQMTR.A + Oxidation (M)<br>K.EAFESTTQYGK.L<br>R.APVVVELPSLEEAGR.L<br>R.EVVSEIASQQPEAK.K         | 1                 |
|          | EAN83022.1    | hypothetical protein, conserved                              | 37536 | 114    | 5       | 6.5E-04<br>1.1E-04<br>1.7E+00<br>1.0E-02<br>2.1E-01 | R.VFLSDTR.D<br>K.VGPWAIAGR.N<br>R.RVFLSDTR.D<br>R.QGLGSEVAEVK.A<br>R.GVWYDFSER.R                       | 2                 |
|          | EAN84370.1    | heat shock 70 kDa protein, mitochondrial precursor, putative | 71585 | 103    | 4       | 2.0E+00<br>8.6E-02<br>4.9E-04<br>8.3E-05            | R.TTPSVVAFK.G<br>R.SKFESLAEK.L<br>R.VLENTEGFR.T<br>K.DAGTIAGLN VIR.V                                   | 0                 |
|          | EAN97592.1    | chaperone DnaJ protein, putative                             | 47563 | 102    | 4       | 2.2E-01<br>1.0E-03<br>1.3E-03<br>6.0E-03            | K.ILEVHIEK.G<br>K.ALGVTESFPR.V<br>R.VSLEDMYNGK.T + Oxidation (M)<br>R.GEGMPLPNTGGLDR.G + Oxidation (M) | 0                 |
|          | EAN87051.1    | SPFH domain / Band 7 family protein, putative                | 44546 | 100    | 2       | 7.9E-03<br>1.3E-07                                  | R.NTIFNIVPQGR.Q<br>R.AEAEAEATGVMAAAISK.S + Oxidation                                                   | 0                 |
|          | EAN88283.1    | hypothetical protein, conserved                              | 46409 | 99     | 4       | 4.6E-05<br>1.5E-01<br>3.0E-04<br>2.6E+00            | R.SGMSYFLR.L<br>R.AEMLVQLLAR.V<br>R.TLLTTLSEHR.Q<br>R.DRAEMLVQLLAR.V + Oxidation (M)                   | 0                 |
|          | EAN98485.1    | histidine ammonia-lyase, putative                            | 58685 | 99     | 3       | 9.6E-03<br>1.1E-05<br>1.9E-02                       | K.VVENVER.I<br>K.GQQLVAQR.L<br>R.ELGVEPITLAAK.E                                                        | 0                 |
|          | EAN81454.1    | histone H4, putative                                         | 11280 | 99     | 2       | 7.0E-05<br>1.2E-05                                  | R.DATAYTEYSR.K<br>K.TVTAVDVVNALR.K                                                                     | 20                |
|          | EAN88684.1    | heat shock protein DnaJ, putative                            | 45029 | 99     | 4       | 7.1E-03<br>1.9E-03<br>4.4E-03<br>3.2E-02            | R.YDQFGEK.G<br>K.IFEIFVEK.G<br>R.GEGDQIPGVR.L<br>R.EGMPIPNTGGVER.G + Oxidation                         | 0                 |

| Band no. | Accession no. | Protein Identity                                                   | Mr    | Mascot<br>SCORE | # PEPT. | E-value                                  | Sequence                                                                                        | Additional copies |
|----------|---------------|--------------------------------------------------------------------|-------|-----------------|---------|------------------------------------------|-------------------------------------------------------------------------------------------------|-------------------|
| 10 cont. | EAN85113.1    | elongation factor 1-gamma (EF-1-gamma), putative                   | 47053 | 98              | 3       | 3.3E-02<br>3.3E-05<br>2.4E-03            | R.EYSNTDTR.T<br>R.ALEAWLETR.T<br>R.LYNTVMQQPK.T + Oxidation                                     | 0                 |
|          | EAN99629.1    | developmentally regulated GTP-binding protein, putative            | 41922 | 96              | 2       | 6.5E-06<br>1.5E-04                       | R.IGFIGFPSVGK.S<br>K.INDIEAEIAR.T                                                               | 0                 |
|          | EAN83019.1    | cystathionine beta-synthase                                        | 44273 | 95              | 2       | 2.0E-03<br>1.2E-06                       | K.GYVLLDQYR.N<br>K.EVTLQALGAEVIR.T                                                              | 7                 |
|          | EAN83533.1    | histone H2B, putative                                              | 12353 | 95              | 3       | 3.3E-02<br>2.0E-03<br>1.8E-05            | R.ELQTAVR.L<br>R.LVLPADLAK.H<br>K.IVNSFVNDLFR.I                                                 | 1                 |
|          | EAN85464.1    | N-acetylglucosamine-6-phosphate deacetylase-like protein, putative | 30949 | 94              | 2       | 2.1E-03<br>1.5E-06                       | R.LDGVGSIER.G<br>K.ANILLNSELNTITK.R                                                             | 1                 |
|          | EAN92822.1    | ribosomal protein L3, putative                                     | 48865 | 91              | 4       | 6.5E-01<br>1.3E-03<br>8.6E-02<br>6.3E-05 | R.VMYTVAR.A + Oxidation (M)<br>R.VVAHTQLR.K<br>R.KLTEQITLK.F<br>K.SITPMGGFVGYGTVR.N + Oxidation | 1                 |
|          | EAN86592.1    | nucleolar RNA-binding protein, putative                            | 38208 | 88              | 2       | 9.6E-04<br>2.6E-05                       | K.IPEEHALR.L<br>K.QFTIATLDPK.K                                                                  | 2                 |
|          | EAN89594.1    | metal-ion transporter, putative                                    | 50934 | 82              | 2       | 1.5E-03<br>6.3E-05                       | R.MPAAVAAITR.Q + Oxidation<br>R.GGSGGEVVADAVLASSR.R                                             | 0                 |
|          | EAN80947.1    | tryparedoxin peroxidase, putative                                  | 22886 | 82              | 3       | 9.5E-02<br>4.1E-04<br>8.4E-04            | R.DVDEALR.L<br>R.GLFIIDPK.Q<br>R.QITVNDLPVGR.D                                                  | 5                 |
|          | EAN91430.1    | hypothetical protein, conserved                                    | 48635 | 81              | 3       | 3.3E-01<br>1.3E-03<br>4.4E-04            | R.HSLIEDPR.A<br>K.FVQLTGSMNPK.F + Oxidation (M)<br>R.ELIDGTAEYLAYR.H                            | 0                 |
|          | EAN87724.1    | glutamate dehydrogenase, putative                                  | 45525 | 79              | 3       | 6.2E-03<br>8.1E-03<br>1.2E-02            | K.HGTVVEEYAK.G<br>K.GLGLQYYAGK.R<br>K.FLGFQTFK.N                                                | 1                 |
|          | EAN82747.1    | Gim5A protein, putative                                            | 27268 | 77              | 2       | 5.5E-01<br>7.0E-08                       | K.ALLPEDAEK.K<br>R.LSLLLNALSSK.T                                                                | 2                 |
|          | EAN83495.1    | 40S ribosomal protein S3a, putative                                | 28554 | 74              | 1       | 1.1E-07                                  | K.VNINEAVTLLTR.N                                                                                | 4                 |
|          | EAN99758.1    | poly(A)-binding protein, putative                                  | 61726 | 74              | 4       | 9.3E-05<br>1.7E+00<br>2.1E-02<br>8.4E-01 | R.SGVTNIVVK.K<br>K.QFTNLYVK.N<br>K.NFDDTVTSER.L<br>K.AVEELDEKESPLAK.E                           | 0                 |

| Band no.   | Accession no.                      | Protein Identity                                            | Mr     | Mascot |         | E-value                                  | Sequence                                                                                    | Additional copies |
|------------|------------------------------------|-------------------------------------------------------------|--------|--------|---------|------------------------------------------|---------------------------------------------------------------------------------------------|-------------------|
|            |                                    |                                                             |        | SCORE  | # PEPT. |                                          |                                                                                             |                   |
| 10 cont.   | EAN81757.1                         | mitochondrial processing peptidase, beta subunit, putative  | 31341  | 72     | 1       | 2.2E-07                                  | R.AAASNFGDLVAASTK.S                                                                         | 0                 |
|            | EAN95481.1                         | retrotransposon hot spot (RHS) protein, putative            | 108368 | 70     | 2       | 8.9E-02<br>1.5E-04                       | R.VLIGTPGIGK.S<br>K.GYIIYDVAK.K                                                             | 0                 |
|            | EAN90055.1                         | galactokinase, putative                                     | 52393  | 69     | 1       | 5.3E-07                                  | R.GIFNIAEQIR.T                                                                              | 1                 |
|            | EAN81197.1                         | hypothetical protein, conserved                             | 30269  | 68     | 4       | 3.9E-02<br>1.3E-02<br>1.4E-02<br>3.5E-03 | K.NLKPGVLLTHS.-<br>K.LFVNPMATSDGK.F<br>K.LFVNPMATSDGK.F + Oxidation (M)<br>R.SYTTSFVTPIPK.C | 2                 |
|            | EAN81408.1                         | retrotransposon hot spot (RHS) protein, putative            | 103887 | 66     | 3       | 2.1E+00                                  | K.ELEGGVTR.I                                                                                | 0                 |
|            | EAN99391.1                         | hypothetical protein, conserved                             | 48903  | 66     | 2       | 1.5E-04<br>1.3E-02                       | R.EGFFVGVLNAR.G<br>R.LPGVDTQLLQK.G                                                          | 0                 |
|            | EAN92220.1                         | pyruvate dehydrogenase E1 component alpha subunit, putative | 43381  | 65     | 2       | 4.5E-03<br>7.7E-04                       | K.SDIQDVR.K<br>R.GGTPGEVFAEMFGK.E + Oxidation                                               | 0                 |
|            | EAN87063.1                         | hypothetical protein, conserved                             | 44364  | 63     | 2       | 2.7E-03<br>2.5E-03                       | K.ALTEEWILGR.K<br>K.ANESLDVNLGQYTR.E                                                        | 0                 |
|            | EAN82629.1                         | heat shock protein 85, putative                             | 81244  | 63     | 2       | 8.9E-05<br>6.7E-02                       | R.GVVDSDELPLNISR.E<br>R.YQSLTNQAVLGDESHLR.I                                                 | 2                 |
|            | EAN86151.1                         | RNA helicase, putative                                      | 49885  | 62     | 2       | 1.2E+00<br>3.0E-06                       | R.DVQTVFLK.T<br>R.IIVATDLFGR.G                                                              | 0                 |
|            | EAN85330.1                         | histone H2A, putative                                       | 14385  | 61     | 2       | 1.2E-04<br>2.2E-02                       | K.AGLIFPVGR.V<br>R.HDDDLGMLLK.D + Oxidation (M)                                             | 10                |
|            | EAN87340.1                         | RNA-binding protein, putative                               | 50174  | 61     | 1       | 2.3E-06                                  | R.NIAENTTEQQLR.E                                                                            | 1                 |
|            | EAN95438.1                         | hypothetical protein, conserved                             | 55839  | 60     | 2       | 2.8E-03<br>1.2E-01                       | R.DVAEAHVRA<br>R.AGEVPAPNAPRA                                                               | 0                 |
|            | EAN85411.1                         | actin, putative                                             | 42296  | 60     | 1       | 2.2E-06                                  | K.AGFSGDDAPR.H                                                                              | 2                 |
|            | EAN80692.1                         | farnesyl synthetase, putative                               | 32609  | 55     | 1       | 8.1E-06                                  | R.AVLAGDFLLAR.A                                                                             | 1                 |
|            | EAN97586.1                         | mitochondrial processing peptidase alpha subunit, putative  | 53421  | 53     | 2       | 8.5E-03<br>1.8E-02                       | K.VKDDEVAAGR.A<br>K.EIAGFLDAAR.G                                                            | 0                 |
|            | EAN91961.1                         | actin-like protein, putative                                | 35384  | 51     | 1       | 2.9E-05                                  | K.VAISSGNSDGITSK.Y                                                                          | 1                 |
|            | EAO00026.1                         | elongation factor TU, putative                              | 52462  | 49     | 1       | 3.2E-05                                  | K.IVGSGETVNLSK.E                                                                            | 1                 |
|            | EAN97520.1                         | hypothetical protein, conserved                             | 42890  | 49     | 2       | 4.6E-03<br>2.7E-02                       | R.NIGAVAFSTR.R<br>R.LSHSANEIAR.S                                                            | 0                 |
|            | EAN83372.1                         | casein kinase II, alpha chain, putative                     | 48379  | 47     | 1       | 2.0E-05                                  | K.APELLLGLR.L                                                                               | 1                 |
| EAN85286.1 | hypothetical protein, conserved    | 50456                                                       | 45     | 1      | 7.1E-05 | K.GTTTLNLFNR.N                           | 0                                                                                           |                   |
| EAN87845.1 | 40S ribosomal protein S4, putative | 30998                                                       | 44     | 1      | 1.0E-03 | K.VENVYTSTGR.I                           | 2                                                                                           |                   |

| Band no. | Accession no. | Protein Identity                                                            | Mr     | Mascot |         | E-value            | Sequence                                   | Additional copies |
|----------|---------------|-----------------------------------------------------------------------------|--------|--------|---------|--------------------|--------------------------------------------|-------------------|
|          |               |                                                                             |        | SCORE  | # PEPT. |                    |                                            |                   |
| 10 cont. | EAN97374.1    | CAAX prenyl protease 1, putative                                            | 49012  | 44     | 2       | 2.0E-03<br>1.2E-01 | K.LYQVDGSR.R<br>R.VAAIDAEIKK.S             | 0                 |
|          | EAN91964.1    | mitochondrial DNA topoisomerase II, putative                                | 138876 | 43     | 1       | 1.1E-04            | R.NLGLLEAELAR.E                            | 1                 |
|          | EAN84604.1    | histone H3, putative                                                        | 21714  | 43     | 1       | 2.0E-04            | R.STDLLLQK.A                               | 7                 |
|          | EAN86114.1    | cysteine desulfurase, putative                                              | 49300  | 39     | 1       | 3.4E-04            | R.AEVADLIGTSPK.G                           | 1                 |
|          | EAN83160.1    | phosphomannose isomerase, putative                                          | 46214  | 38     | 2       | 1.2E+00<br>8.8E-04 | R.NNVPFLK.V<br>K.TLLGNVAVVSAK.E            | 0                 |
|          | EAN81270.1    | sterol 24-c-methyltransferase, putative                                     | 41138  | 38     | 1       | 4.9E-04            | K.GAEILEEAAR.S                             | 1                 |
|          | EAN92318.1    | 69 kDa paraflagellar rod protein, putative                                  | 70087  | 37     | 1       | 4.9E-04            | R.TVSFTGTIDNAIAK.L                         | 0                 |
|          | EAN94531.1    | hypothetical protein, conserved<br>vacuolar-type proton translocating       | 57858  | 37     | 1       | 4.9E-04            | K.AIEAFALLR.E                              | 1                 |
|          | EAN91609.1    | pyrophosphatase 1, putative                                                 | 86135  | 36     | 1       | 3.1E-04            | R.VGIPTINILDAR.V                           | 1                 |
|          | EAN85233.1    | axoneme central apparatus protein, putative                                 | 34377  | 35     | 1       | 1.1E-03            | R.TAASTLSDIK.H                             | 1                 |
|          | EAN86963.1    | calcium-binding protein, putative                                           | 59793  | 34     | 1       | 5.4E-04            | R.VPGEVIDLLR.E                             | 1                 |
|          | EAN92888.1    | acyl-CoA dehydrogenase, putative                                            | 69549  | 33     | 1       | 3.2E-04            | K.GISLFLVPR.H                              | 0                 |
|          | EAN99748.1    | isocitrate dehydrogenase, putative                                          | 47184  | 33     | 2       | 3.7E-02<br>8.6E-02 | R.HAFGDQYR.A<br>K.LVQFSMLLEK.V + Oxidation | 0                 |
|          | EAN90413.1    | ADP,ATP carrier protein 1, mitochondrial<br>precursor, putative             | 35303  | 32     | 1       | 2.1E-03            | K.LLVQNQGEMIK.Q + Oxidation                | 1                 |
|          | EAN95451.1    | hypothetical protein, conserved                                             | 40559  | 32     | 1       | 1.1E-03            | R.DFYTTLGYQR.N                             | 0                 |
|          | EAN98359.1    | lanosterol 14-alpha-demethylase, putative                                   | 55343  | 30     | 1       | 2.4E-04            | K.ILGEIIVAR.E                              | 1                 |
|          | EAN83529.1    | hypothetical protein, conserved                                             | 93603  | 30     | 1       | 5.1E-03            | K.SYPLNTPSQR.L                             | 1                 |
|          | EAN88449.1    | eukaryotic translation initiation factor, putative                          | 46736  | 30     | 1       | 4.7E-03            | K.LTGSEIDALR.S                             | 1                 |
|          | EAN81839.1    | hypothetical protein, conserved                                             | 57315  | 29     | 1       | 2.6E-03            | R.TTSYGVGQIK.Y                             | 1                 |
|          | EAN87580.1    | cytosolic leucyl aminopeptidase, putative                                   | 62519  | 28     | 1       | 4.6E-03            | R.HSDEATALVGK.G                            | 1                 |
|          | EAN86158.1    | hexose transporter, putative                                                | 59892  | 28     | 1       | 5.1E-03            | R.QSPIEVATPGNR.Q                           | 1                 |
|          | EAN83996.1    | retrotransposon hot spot (RHS) protein,<br>putative                         | 70492  | 28     | 2       | 5.5E-04<br>1.1E+00 | R.LLLIGTPGIGK.S<br>K.AGTGMGMKVEK.G         | 0                 |
|          | EAN82723.1    | glutamate dehydrogenase, putative                                           | 43888  | 27     | 1       | 4.4E-03            | R.GYTDDGTTSVYTAK.W                         | 0                 |
|          | EAO00208.1    | hypothetical protein, conserved                                             | 38955  | 27     | 1       | 2.6E-03            | K.VFLPSYPK.W                               | 1                 |
|          | EAN87059.1    | hypothetical protein, conserved                                             | 21263  | 26     | 1       | 8.6E-03            | K.SVGLTAALSPK.Q                            | 0                 |
|          | EAN84271.1    | glutamate dehydrogenase, putative                                           | 24319  | 26     | 1       | 7.0E-03            | R.ANILASDVFK.N                             | 0                 |
|          | EAO00224.1    | 60S ribosomal protein L13, putative                                         | 25420  | 24     | 1       | 7.0E-03            | K.LVLFPMYSYK.N + Oxidation                 | 2                 |
|          | EAN99098.1    | hypothetical protein, conserved                                             | 62079  | 22     | 1       | 3.6E-03            | K.AALLAYLEK.K                              | 0                 |
|          | EAO00215.1    | hypothetical protein, conserved<br>mitochondrial processing peptidase, beta | 49404  | 22     | 1       | 8.5E-03            | R.ALTGALSAVYK.L                            | 1                 |
|          | EAN84761.1    | subunit, putative                                                           | 15529  | 22     | 1       | 1.1E-02            | R.AVGLLADVVR.N                             | 1                 |



| Band no. | Accession no. | Protein Identity                 | Mr    | Mascot |         |         | Sequence                | Additional copies |
|----------|---------------|----------------------------------|-------|--------|---------|---------|-------------------------|-------------------|
|          |               |                                  |       | SCORE  | # PEPT. | E-value |                         |                   |
| 10 cont. | EAN81429.1    | hypothetical protein, conserved  | 69263 | 20     | 1       | 2.9E-02 | R.LLYGEWYTR.E           | 9                 |
|          | EAN88664.1    | chaperone DnaJ protein, putative | 51044 | 20     | 1       | 2.5E-02 | K.VPVGTTQQGDK.L         | 1                 |
|          | EAN93181.1    | hypothetical protein, conserved  | 40812 | 19     | 1       | 8.5E-03 | K.MVLLTVK.G + Oxidation | 0                 |
|          | EAN85214.1    | hypothetical protein, conserved  | 21287 | 19     | 1       | 1.4E-02 | K.HALSSFLK.D            | 0                 |
|          | EAN87862.1    | vesicle-fusing ATPase, putative  | 80311 | 17     | 1       | 4.1E-02 | K.GVLLYGPPGTGK.T        | 11                |

**TABLE S3 (BANDS 11-12): COMPLETE PEPTIDE LIST**

| Band no.   | Accession no.                       | Protein Identity                      | Mr     | SCORE | # PEPT. | E-value | Mascot      | Additional gene copies under same match |                                  |
|------------|-------------------------------------|---------------------------------------|--------|-------|---------|---------|-------------|-----------------------------------------|----------------------------------|
|            |                                     |                                       |        |       |         |         | Sequence    |                                         |                                  |
| Band 11    | EAN99374.1                          | pyruvate phosphate dikinase, putative | 101851 | 722   | 21      | 1.3E-02 | K.LQSPDLK.G | 0                                       |                                  |
|            |                                     |                                       |        |       |         |         | 1.0E-02     |                                         | R.DDAGSFLR.H                     |
|            |                                     |                                       |        |       |         |         | 1.2E-04     |                                         | R.SATGVAFSR.S                    |
|            |                                     |                                       |        |       |         |         | 6.3E-03     |                                         | K.ATAEAWIR.R                     |
|            |                                     |                                       |        |       |         |         | 1.2E-02     |                                         | R.GDFLGIFR.T                     |
|            |                                     |                                       |        |       |         |         | 2.5E-01     |                                         | R.FVYDSYR.R                      |
|            |                                     |                                       |        |       |         |         | 4.2E-04     |                                         | K.GLIYAGQLK.L                    |
|            |                                     |                                       |        |       |         |         | 3.4E-01     |                                         | K.KEELTFTK.Q                     |
|            |                                     |                                       |        |       |         |         | 7.5E-04     |                                         | R.ANADTPNDAAK.A                  |
|            |                                     |                                       |        |       |         |         | 1.0E-04     |                                         | R.GGMTSHAAVVAR.G + Oxidation (M) |
|            |                                     |                                       |        |       |         |         | 8.5E-06     |                                         | K.TAEETLAAAGQR.V                 |
|            |                                     |                                       |        |       |         |         | 8.4E-05     |                                         | K.GLPQEVVEQVK.A                  |
|            |                                     |                                       |        |       |         |         | 2.5E-05     |                                         | R.EMILADTLEGR.K                  |
|            |                                     |                                       |        |       |         |         | 4.5E-02     |                                         | R.TEHMFFEGSR.I + Oxidation (M)   |
|            |                                     |                                       |        |       |         |         | 1.2E-04     |                                         | R.EMILADTLEGR.K + Oxidation (M)  |
|            |                                     |                                       |        |       |         |         | 8.1E-02     |                                         | K.VIPEIMIPLVGK.K + Oxidation (M) |
|            |                                     |                                       |        |       |         |         | 3.8E-06     |                                         | R.TPQQIQQSLSLR.W                 |
| 8.5E-06    | R.EGLITKEEAVLR.I                    |                                       |        |       |         |         |             |                                         |                                  |
| 4.0E-02    | K.SLHEMNPMLGHR.G + 2 Oxidation (M)  |                                       |        |       |         |         |             |                                         |                                  |
| 1.8E-07    | R.LETSPEDLAGMDAAR.G + Oxidation (M) |                                       |        |       |         |         |             |                                         |                                  |
| 3.5E-07    | K.GLAASPGAAVGVQIVFDADSAK.E          |                                       |        |       |         |         |             |                                         |                                  |
| EAN85498.1 | EAN85498.1                          | glutamamyl carboxypeptidase, putative | 44258  | 635   | 19      | 7.0E-03 | R.EIAEEYR.R | 0                                       |                                  |
|            |                                     |                                       |        |       |         |         | 3.3E-01     |                                         | K.GGSHFWVR.V                     |
|            |                                     |                                       |        |       |         |         | 6.0E-01     |                                         | R.ALPNETVSK.M                    |
|            |                                     |                                       |        |       |         |         | 3.3E-02     |                                         | K.DYLEGLGVK.C                    |
|            |                                     |                                       |        |       |         |         | 4.8E-06     |                                         | K.LVAFDTTSR.N                    |
|            |                                     |                                       |        |       |         |         | 4.7E-03     |                                         | R.EIAEEYRR.N                     |
|            |                                     |                                       |        |       |         |         | 1.9E-05     |                                         | K.CTLHNAER.N                     |
|            |                                     |                                       |        |       |         |         | 1.5E-02     |                                         | K.LREIAEEYR.R                    |
|            |                                     |                                       |        |       |         |         | 2.6E-04     |                                         | R.SMDHTQWLAK.L                   |
|            |                                     |                                       |        |       |         |         | 2.9E-02     |                                         | R.SMDHTQWLAK.L + Oxidation (M)   |
|            |                                     |                                       |        |       |         |         | 5.7E-06     |                                         | K.WSDPFTLTER.D                   |
|            |                                     |                                       |        |       |         |         | 2.8E-06     |                                         | R.SYVETQLLPAMK.A                 |
|            |                                     |                                       |        |       |         |         | 4.8E-03     |                                         | R.SYVETQLLPAMK.A + Oxidation (M) |
|            |                                     |                                       |        |       |         |         | 1.8E-05     |                                         | K.AEFEDAEIVITPR.N                |
|            |                                     |                                       |        |       |         |         | 2.0E-05     |                                         | K.ANLWATLPGDGGVTK.G              |
| 3.9E-06    | R.NETPSFEGSEEAPFTK.L                |                                       |        |       |         |         |             |                                         |                                  |

| Band no.   | Accession no.                         | Protein Identity | Mr  | SCORE | # PEPT.  | E-value                                       | Mascot                                        | Additional copies |
|------------|---------------------------------------|------------------|-----|-------|----------|-----------------------------------------------|-----------------------------------------------|-------------------|
|            |                                       |                  |     |       |          |                                               | Sequence                                      |                   |
| 11 cont.   | EAN85498.1                            | cont.            |     |       |          | 5.0E-03                                       | K.GGIILSGHTDVPVVDGQK.W                        |                   |
|            |                                       |                  |     |       |          | 2.5E-04                                       | R.AEGCIIGEPTGMTVVIAHK.G + Oxidation (M)       |                   |
|            |                                       |                  |     |       |          | 4.6E-03                                       | R.SYVETQLLPAMKAEFEDAEIVITPR.N + Oxidation (M) |                   |
| EAN82710.1 | glutamamyl carboxypeptidase, putative | 44359            | 625 | 18    | 1.4E-05  | R.DETPSFEGSEEPITK.L                           | 0                                             |                   |
| EAN82317.1 | glutamamyl carboxypeptidase, putative | 44248            | 567 | 16    | 7.0E-03  | R.EIAEEYR.R                                   | 1                                             |                   |
|            |                                       |                  |     |       | 3.3E-02  | K.DYLEGLGVK.C                                 |                                               |                   |
|            |                                       |                  |     |       | 4.8E-06  | K.LVAFDTTSR.N                                 |                                               |                   |
|            |                                       |                  |     |       | 4.7E-03  | R.EIAEEYRR.N                                  |                                               |                   |
|            |                                       |                  |     |       | 1.9E-05  | K.CTLIHNAER.N                                 |                                               |                   |
|            |                                       |                  |     |       | 1.5E-02  | K.LREIAEEYR.R                                 |                                               |                   |
|            |                                       |                  |     |       | 2.6E-04  | R.SMDHTQWLAK.L                                |                                               |                   |
|            |                                       |                  |     |       | 2.9E-02  | R.SMDHTQWLAK.L + Oxidation (M)                |                                               |                   |
|            |                                       |                  |     |       | 5.7E-06  | K.WSDPFTLTER.D                                |                                               |                   |
|            |                                       |                  |     |       | 2.8E-06  | R.SYVETQLLPAMK.A                              |                                               |                   |
|            |                                       |                  |     |       | 4.8E-03  | R.SYVETQLLPAMK.A + Oxidation (M)              |                                               |                   |
|            |                                       |                  |     |       | 1.8E-05  | K.AEFEDAEIVITPR.N                             |                                               |                   |
|            |                                       |                  |     |       | 2.0E-05  | K.ANLWATLPGDGGVTK.G                           |                                               |                   |
|            |                                       |                  |     |       | 5.0E-03  | K.GGIILSGHTDVPVVDGQK.W                        |                                               |                   |
|            |                                       |                  |     |       | 2.5E-04  | R.AEGCIIGEPTGMTVVIAHK.G + Oxidation (M)       |                                               |                   |
|            |                                       |                  |     |       | 4.6E-03  | R.SYVETQLLPAMKAEFEDAEIVITPR.N + Oxidation (M) |                                               |                   |
| EAN87141.1 | hexokinase, putative                  | 52750            | 543 | 19    | 0.0008   | R.MPGLQFTR.Q                                  | 0                                             |                   |
|            |                                       |                  |     |       | 0.0014   | K.GVDNGFLIK.W                                 |                                               |                   |
|            |                                       |                  |     |       | 0.00056  | R.MPGLQFTR.Q + Oxidation (M)                  |                                               |                   |
|            |                                       |                  |     |       | 0.97     | R.MLPSYVYK.T + Oxidation (M)                  |                                               |                   |
|            |                                       |                  |     |       | 0.0004   | K.FMGMISADR.M                                 |                                               |                   |
|            |                                       |                  |     |       | 6.2e-005 | R.MIAHLAELR.C                                 |                                               |                   |
|            |                                       |                  |     |       | 0.005    | K.FMGMISADR.M + 2 Oxidation (M)               |                                               |                   |
|            |                                       |                  |     |       | 0.00099  | R.ATVAIDGSVFEK.T                              |                                               |                   |
|            |                                       |                  |     |       | 0.02     | K.MAKPWSFETK.F + Oxidation (M)                |                                               |                   |
|            |                                       |                  |     |       | 0.0021   | R.LNNLLQHIAVK.D                               |                                               |                   |
|            |                                       |                  |     |       | 8.7e-005 | K.MVSGMYLGEISR.R + Oxidation (M)              |                                               |                   |
|            |                                       |                  |     |       | 1.4e-005 | K.MVSGMYLGEISR.R + 2 Oxidation (M)            |                                               |                   |
|            |                                       |                  |     |       | 3.7e-005 | K.DVVELLQNALKR.M                              |                                               |                   |
|            |                                       |                  |     |       | 0.00017  | R.MALASLANQFTVGK.D                            |                                               |                   |
|            |                                       |                  |     |       | 7.7e-007 | R.MALASLANQFTVGK.D + Oxidation (M)            |                                               |                   |
|            |                                       |                  |     |       | 0.00044  | R.TVPLGFTFSFPTEQK.G                           |                                               |                   |
|            |                                       |                  |     |       | 0.71     | R.DGSGIGAAFISALVVNDK.-                        |                                               |                   |
|            |                                       |                  |     |       | 0.13     | R.MALASLANQFTVGKDHLLK.Q + Oxidation (M)       |                                               |                   |
|            |                                       |                  |     |       | 4e-009   | K.FVLPVTAYDEAMDAVTPNR.N + Oxidation (M)       |                                               |                   |

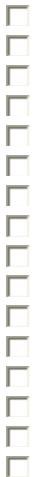

| Band no.                 | Accession no.       | Protein Identity                          | Mr    | SCORE | # PEPT. | E-value | Mascot                                         | Additional copies |
|--------------------------|---------------------|-------------------------------------------|-------|-------|---------|---------|------------------------------------------------|-------------------|
|                          |                     |                                           |       |       |         |         | Sequence                                       |                   |
| <input type="checkbox"/> | 11 cont. EAN97657.1 | chaperonin HSP60, mitochondrial precursor | 59413 | 523   | 9       | 3.4E-06 | R.AVSAVATTLGPK.G                               | 0                 |
| <input type="checkbox"/> |                     |                                           |       |       |         |         | 1.6E-06 K.VGGGSEVEVNEK.K                       |                   |
| <input type="checkbox"/> |                     |                                           |       |       |         |         | 5.1E-06 R.NVIEQSYGAPK.I                        |                   |
| <input type="checkbox"/> |                     |                                           |       |       |         |         | 5.9E-05 R.GLIDGETSDYNR.E                       |                   |
|                          |                     |                                           |       |       |         |         | 5.9E-05 R.GYISPYFVTDAA.K                       |                   |
|                          |                     |                                           |       |       |         |         | 1.4E-07 K.AELEDADFVLVSAK.K                     |                   |
|                          |                     |                                           |       |       |         |         | 3.6E-08 R.AVGVILQSVAEQSR.K                     |                   |
|                          |                     |                                           |       |       |         |         | 1.1E-06 K.TAMMQDIAIFAGAR.L + 2 Oxidation (M)   |                   |
|                          |                     |                                           |       |       |         |         | 1.3E-04 R.AAVQEGIVPGGGVALLR.A                  |                   |
|                          | EAN94839.1          | beta tubulin, putative                    | 50520 | 498   | 16      | 1.1E-02 | R.YLTASALFR.G                                  | 0                 |
|                          |                     |                                           |       |       |         | 2.9E-04 | K.NMMQAADPR.H + Oxidation (M)                  |                   |
|                          |                     |                                           |       |       |         | 3.0E-05 | K.LAVNLVPPFR.L                                 |                   |
|                          |                     |                                           |       |       |         | 2.8E-03 | R.FPGQLNSDLR.K                                 |                   |
|                          |                     |                                           |       |       |         | 3.4E-06 | R.VGEQFTAMFR.R                                 |                   |
|                          |                     |                                           |       |       |         | 7.0E-06 | R.VGEQFTAMFR.R + Oxidation (M)                 |                   |
|                          |                     |                                           |       |       |         | 3.6E-05 | R.KLAVNLVPPFR.L                                |                   |
|                          |                     |                                           |       |       |         | 9.6E-08 | R.INVYFDEATGGR.Y                               |                   |
|                          |                     |                                           |       |       |         | 1.1E-01 | R.IMMTFSIIPSPK.V + Oxidation (M)               |                   |
|                          |                     |                                           |       |       |         | 2.7E-02 | R.IMMTFSIIPSPK.V + 2 Oxidation (M)             |                   |
|                          |                     |                                           |       |       |         | 1.5E-06 | K.EVDEQMLNVQNK.N + Oxidation (M)               |                   |
|                          |                     |                                           |       |       |         | 4.3E-05 | R.AVLIDLEPGTMDSVR.A                            |                   |
|                          |                     |                                           |       |       |         | 3.7E-06 | R.AVLIDLEPGTMDSVR.A + Oxidation (M)            |                   |
|                          |                     |                                           |       |       |         | 1.3E-04 | R.GLSVPELTQQMFDAA.N + Oxidation (M)            |                   |
|                          |                     |                                           |       |       |         | 9.8E-02 | R.LHFFMMGFAPLTSR.G + 2 Oxidation (M)           |                   |
|                          | EAN94612.1          | hexokinase, putative                      | 52802 | 468   | 19      | 1.4E-02 | K.DVVELLQK.A                                   | 0                 |
|                          |                     |                                           |       |       |         | 4.1E-03 | K.GVDHGFLIK.W                                  |                   |
|                          | EAN81053.1          | alpha tubulin, putative                   | 50549 | 424   | 10      | 6.2E-02 | R.LSVDYGKK.S                                   | 0                 |
|                          |                     |                                           |       |       |         | 2.6E-04 | K.DVNAAVATIK.T                                 |                   |
|                          |                     |                                           |       |       |         | 2.2E-04 | K.EDAANNYAR.G                                  |                   |
|                          |                     |                                           |       |       |         | 1.0E-02 | R.IDHKFDLMYSK.R                                |                   |
|                          |                     |                                           |       |       |         | 2.0E-03 | R.QLFHPEQLISGK.E                               |                   |
|                          |                     |                                           |       |       |         | 3.4E-08 | R.LIGQVVSALTASLR.F                             |                   |
|                          |                     |                                           |       |       |         | 2.5E-05 | R.TIQFVDWSPTGFK.C                              |                   |
|                          |                     |                                           |       |       |         | 4.5E-06 | R.AVFLDLEPTVVDEIR.T                            |                   |
|                          |                     |                                           |       |       |         | 7.8E-06 | R.IHFVLTSYAPVISAEL.A                           |                   |
|                          |                     |                                           |       |       |         | 1.9E-04 | K.AYHEQLSVSEISNAVFEPASMMTK.C + 2 Oxidation (M) |                   |
|                          | EAN98272.1          | eukaryotic initiation factor 4a, putative | 49984 | 370   | 9       | 2.8E-01 | R.AIVPFTR.G                                    | 1                 |
|                          |                     |                                           |       |       |         | 1.5E-03 | R.ESLTLEGIK.Q                                  |                   |
|                          |                     |                                           |       |       |         | 3.9E-05 | R.VLVTDLVAR.G                                  |                   |
|                          |                     |                                           |       |       |         | 2.6E-07 | K.TGAFSIGLLQR.L                                |                   |
|                          |                     |                                           |       |       |         | 3.7E-03 | R.KGVAINFVTQK.D                                |                   |

| Band no.   | Accession no.                           | Protein Identity | Mr    | SCORE | # PEPT. | Mascot     |                                     | Additional copies |
|------------|-----------------------------------------|------------------|-------|-------|---------|------------|-------------------------------------|-------------------|
|            |                                         |                  |       |       |         | E-value    | Sequence                            |                   |
| 11 cont.   | EAN98272.1                              | cont.            |       |       |         | 1.4E-07    | R.GGDIIAQAQSGTGK.T                  |                   |
|            |                                         |                  |       |       |         | 1.4E-05    | K.LQAGSIVAVGTPGR.V                  |                   |
|            |                                         |                  |       |       |         | 1.5E-04    | R.HNVLQGLVLSPTR.E                   |                   |
|            |                                         |                  |       |       |         | 9.2E-03    | R.GIYSHGFEPSSIQQR.A                 |                   |
| EAN87966.1 | glucose-regulated protein 78, putative  |                  | 71414 | 364   | 7       | 1.3E-03    | R.LSEEEIER.M                        | 0                 |
|            |                                         |                  |       |       |         | 6.1E-05    | K.DAGTIAGLNVVR.I                    |                   |
|            |                                         |                  |       |       |         | 3.3E-03    | R.NSLESVAYSLR.N                     |                   |
|            |                                         |                  |       |       |         | 1.8E-02    | K.LQSVTNPIIQK.V                     |                   |
|            |                                         |                  |       |       |         | 4.7E-07    | R.ITPSVVAFETETER.L                  |                   |
|            |                                         |                  |       |       |         | 5.9E-09    | R.IINEPTAAAIAYGLNK.A                |                   |
|            |                                         |                  |       |       |         | 1.9E-08    | R.VEVDLSTEGFDFSEK.I                 |                   |
| EAO00202.1 | 6-phospho-1-fructokinase, putative      |                  | 54100 | 357   | 9       | 3.4E-02    | R.FGYWGLSK.K                        | 0                 |
|            |                                         |                  |       |       |         | 5.1E-05    | R.YGGTILGSSR.G                      |                   |
|            |                                         |                  |       |       |         | 4.1E+00    | R.ELEAISLVR.E                       |                   |
|            |                                         |                  |       |       |         | 9.5E-06    | K.LTDIGVVLTK.R                      |                   |
|            |                                         |                  |       |       |         | 1.4E-06    | R.GANLAVFGIPK.T                     |                   |
|            |                                         |                  |       |       |         | 1.6E-03    | R.TFGFETAVDK.A                      |                   |
|            |                                         |                  |       |       |         | 1.0E-08    | R.SLTLTAVNAYR.V                     |                   |
|            |                                         |                  |       |       |         | 1.2E-03    | R.YNSYILVPIK.V                      |                   |
|            |                                         |                  |       |       |         | 6.8E-04    | R.GPQDTSEMVDTLER.L + Oxidation (M)  |                   |
|            |                                         |                  |       |       |         | EAN95952.1 | hypothetical protein, conserved     |                   |
| 8.4E-05    | R.FVFTAVLPR.F                           |                  |       |       |         |            |                                     |                   |
| 4.1E-03    | R.LIFLYPMSK.L                           |                  |       |       |         |            |                                     |                   |
| 4.5E-02    | R.LIFLYPMSK.L + Oxidation (M)           |                  |       |       |         |            |                                     |                   |
| 4.9E-06    | K.IINLSAEEIR.A                          |                  |       |       |         |            |                                     |                   |
| 5.9E-06    | R.VIYLNLNNEEPR.T                        |                  |       |       |         |            |                                     |                   |
| 5.3E-07    | K.SEEPSGLELVDLR.D                       |                  |       |       |         |            |                                     |                   |
| 6.9E-06    | R.NYQILEEWYGR.E                         |                  |       |       |         |            |                                     |                   |
| EAN95886.1 | heat shock protein 70 (HSP70), putative |                  | 71171 | 330   | 10      | 1.2E+00    | R.NQIVITNDK.G                       | 0                 |
|            |                                         |                  |       |       |         | 2.4E-03    | K.NTVNEPNVAGK.I                     |                   |
|            |                                         |                  |       |       |         | 2.0E-04    | R.VEIIANDQGNR.T                     |                   |
|            |                                         |                  |       |       |         | 5.2E-04    | K.DAGTIAGMEVLR.I                    |                   |
|            |                                         |                  |       |       |         | 1.1E-01    | R.AVHDVVLVGGSTR.I                   |                   |
|            |                                         |                  |       |       |         | 1.8E-03    | K.VMQLVSDFFGGK.E + Oxidation (M)    |                   |
|            |                                         |                  |       |       |         | 1.2E-03    | R.TTPSYVAFTDTER.L                   |                   |
|            |                                         |                  |       |       |         | 9.9E-02    | K.TFNPEEVSSMVLK.M + Oxidation (M)   |                   |
|            |                                         |                  |       |       |         | 1.0E-03    | R.IINEPTAAAIAYGLDK.V                |                   |
|            |                                         |                  |       |       |         | 6.6E-09    | K.NQVAMNPTNTVFDAK.R + Oxidation (M) |                   |
| EAN83852.1 | heat shock 70 kDa protein, putative     |                  | 41044 | 324   | 10      | 7.5E-03    | R.GTLQPVER.V                        | 0                 |
|            |                                         |                  |       |       |         | 8.1E-01    | R.LVSHFTDEFK.R                      |                   |

| Band no.   | Accession no.                                          | Protein Identity                                       | Mr    | SCORE | # PEPT. | E-value                      | Mascot      | Additional copies                      |                                |
|------------|--------------------------------------------------------|--------------------------------------------------------|-------|-------|---------|------------------------------|-------------|----------------------------------------|--------------------------------|
|            |                                                        |                                                        |       |       |         |                              | Sequence    |                                        |                                |
| 11 cont.   | EAN96732.1                                             | succinyl-CoA ligase [GDP-forming] beta-chain, putative | 46089 | 276   | 9       | 3.1E-01                      | R.NFEEAAK.L | 0                                      |                                |
|            |                                                        |                                                        |       |       |         |                              | 2.1E-04     |                                        | R.AAENAAEQVK.A                 |
|            |                                                        |                                                        |       |       |         |                              | 2.8E-02     |                                        | R.GMGTFEDGFK.G + Oxidation (M) |
|            |                                                        |                                                        |       |       |         |                              | 2.3E-03     |                                        | R.TLEEVEAALGK.I                |
|            |                                                        |                                                        |       |       |         |                              | 5.5E-06     |                                        | K.LSFDDNAEFR.Q                 |
|            |                                                        |                                                        |       |       |         |                              | 7.3E-04     |                                        | R.ILQESGLPLHPAR.N              |
|            |                                                        |                                                        |       |       |         |                              | 5.5E-02     |                                        | K.DIFSLADDTQIDPK.E             |
|            |                                                        |                                                        |       |       |         |                              | 5.8E-07     |                                        | K.EQIVAAFQIITGDEK.V            |
|            |                                                        |                                                        |       |       |         |                              | 3.3E+00     |                                        | R.QKDIFSLADDTQIDPK.E           |
| EAN92822.1 | ribosomal protein L3, putative                         | 48865                                                  | 264   | 8     | 5.1E-02 | R.VMYTVAR.A + Oxidation (M)  | 1           |                                        |                                |
|            |                                                        |                                                        |       |       |         | 2.3E-03                      |             | R.VVAHTQLR.K                           |                                |
|            |                                                        |                                                        |       |       |         | 2.4E-03                      |             | K.QSAQLAFTK.R                          |                                |
|            |                                                        |                                                        |       |       |         | 1.9E-02                      |             | R.RPMAPQTSR.K                          |                                |
|            |                                                        |                                                        |       |       |         | 5.2E-03                      |             | R.KLTEQITLK.F                          |                                |
|            |                                                        |                                                        |       |       |         | 1.1E-04                      |             | K.SITPMGGFVGYGTVR.N                    |                                |
|            |                                                        |                                                        |       |       |         | 5.1E-06                      |             | K.SITPMGGFVGYGTVR.N + Oxidation (M)    |                                |
|            |                                                        |                                                        |       |       |         | 1.1E-08                      |             | R.AVSMEPNQATTTYDLTAK.S + Oxidation (M) |                                |
| EAN90055.1 | galactokinase, putative                                | 52393                                                  | 246   | 5     | 2.2E-05 | K.MNNAFTFR.D + Oxidation (M) | 0           |                                        |                                |
|            |                                                        |                                                        |       |       |         | 2.4E-05                      |             | R.SDAEGAQAVVR.K                        |                                |
|            |                                                        |                                                        |       |       |         | 5.8E-04                      |             | R.GIFNIAEQIR.T                         |                                |
|            |                                                        |                                                        |       |       |         | 3.0E-06                      |             | R.AINLEEGVSGGR.L                       |                                |
|            |                                                        |                                                        |       |       |         | 2.0E-04                      |             | K.AGELLNATHQGQR.D                      |                                |
| EAN82858.1 | elongation factor 1-alpha (EF-1-alpha), putative       | 49694                                                  | 236   | 5     | 2.3E-03 | K.SVNFAQER.Y                 | 4           |                                        |                                |
|            |                                                        |                                                        |       |       |         | 8.8E-07                      |             | K.IGGIGTVPVGR.V                        |                                |
|            |                                                        |                                                        |       |       |         | 6.2E-03                      |             | K.STATGHLYK.C                          |                                |
|            |                                                        |                                                        |       |       |         | 1.2E-03                      |             | K.VHMNLVVVGHVDAGK.S + Oxidation (M)    |                                |
|            |                                                        |                                                        |       |       |         | 6.6E-08                      |             | R.FIPISGWQGDNMIDK.S + Oxidation (M)    |                                |
| EAN91288.1 | galactokinase, putative                                | 52368                                                  | 235   | 5     | 4.3E-04 | R.SDAEGAQAVVK.K              | 0           |                                        |                                |
| EAN95983.1 | ATPase beta subunit, putative                          | 55980                                                  | 233   | 5     | 1.5E-03 | K.IGLFGGAGVGK.T              | 0           |                                        |                                |
|            |                                                        |                                                        |       |       |         | 9.6E-07                      |             | R.IFNVLGDAIDQR.G                       |                                |
|            |                                                        |                                                        |       |       |         | 8.8E-07                      |             | R.VAQSALTMAEYFR.D                      |                                |
|            |                                                        |                                                        |       |       |         | 3.6E-07                      |             | R.FTQANSEVSALLGR.I                     |                                |
|            |                                                        |                                                        |       |       |         | 9.1E-06                      |             | R.VAQSALTMAEYFR.D + Oxidation (M)      |                                |
| EAN88964.1 | glycosomal phosphoenolpyruvate carboxykinase, putative | 59404                                                  | 223   | 6     | 2.6E-02 | R.IVDTDDVR.E                 | 1           |                                        |                                |
|            |                                                        |                                                        |       |       |         | 6.1E-04                      |             | K.LSEESFAR.V                           |                                |
|            |                                                        |                                                        |       |       |         | 3.9E-05                      |             | K.TTLSADPHR.N                          |                                |
|            |                                                        |                                                        |       |       |         | 3.1E-04                      |             | K.TEKDIYDAVR.F                         |                                |
|            |                                                        |                                                        |       |       |         | 3.0E-04                      |             | R.VWLLNTGYAGGR.A                       |                                |
|            |                                                        |                                                        |       |       |         | 1.4E-03                      |             | R.EQVILGTEYAGEMK.K                     |                                |

| Band no.   | Accession no.                                                      | Protein Identity                  | Mr    | SCORE | # PEPT. | E-value                        | Mascot       | Additional copies                     |                            |
|------------|--------------------------------------------------------------------|-----------------------------------|-------|-------|---------|--------------------------------|--------------|---------------------------------------|----------------------------|
|            |                                                                    |                                   |       |       |         |                                | Sequence     |                                       |                            |
| 11 cont.   | EAN99758.1                                                         | poly(A)-binding protein, putative | 61726 | 216   | 7       | 4.3E-04                        | K.ALDQAGVK.L | 0                                     |                            |
|            |                                                                    |                                   |       |       |         |                                | 1.2E+00      |                                       | K.YPNLYVK.N                |
|            |                                                                    |                                   |       |       |         |                                | 3.2E-03      |                                       | R.SGVTNIVVK.K              |
|            |                                                                    |                                   |       |       |         |                                | 5.0E-05      |                                       | K.NFDDTVTSE.L              |
|            |                                                                    |                                   |       |       |         |                                | 3.9E-07      |                                       | R.LTAIGLATNENGESR.G        |
|            |                                                                    |                                   |       |       |         |                                | 4.7E-01      |                                       | K.AVEELDEKESPLAK.E         |
|            |                                                                    |                                   |       |       |         |                                | 4.9E-02      |                                       | R.DLGANQTVGFAYVAYATHEAAK.A |
| EAN85411.1 | actin, putative                                                    | 42296                             | 208   | 5     | 5.4E-05 | K.AGFSGDDAPR.H                 | 1            |                                       |                            |
|            |                                                                    |                                   |       |       |         | 6.0E-02                        |              | R.HVFPDIVGRPK.N                       |                            |
|            |                                                                    |                                   |       |       |         | 7.3E-04                        |              | K.EISNLPSSIKPK.V                      |                            |
|            |                                                                    |                                   |       |       |         | 2.3E-09                        |              | K.LLMESGMTFTTSAEK.E + 2 Oxidation (M) |                            |
|            |                                                                    |                                   |       |       |         | 5.7E-03                        |              | R.VNPESHVLLTEAPMNP.K + Oxidation (M)  |                            |
| EAN88605.1 | acetylornithine deacetylase-like, putative                         | 44189                             | 187   | 4     | 4.2E-03 | R.LIAFDTTSR.N                  | 0            |                                       |                            |
|            |                                                                    |                                   |       |       |         | 2.5E-05                        |              | M.PLDSVEWLR.R                         |                            |
|            |                                                                    |                                   |       |       |         | 2.9E-05                        |              | R.IDDFVAATAQK.M                       |                            |
| EAN81916.1 | ATP synthase, alpha chain, mitochondrial precursor, putative       | 25912                             | 182   | 4     | 5.7E-05 | K.AVDTMIPIGR.G + Oxidation (M) | 0            |                                       |                            |
|            |                                                                    |                                   |       |       |         | 1.3E-04                        |              | K.VDTGAPNIVSR.S                       |                            |
|            |                                                                    |                                   |       |       |         | 6.3E-04                        |              | R.SPVNYNLLTGFK.A                      |                            |
|            |                                                                    |                                   |       |       |         | 6.0E-06                        |              | K.TSIAVSTIINQVR.I                     |                            |
| EAN85464.1 | N-acetylglucosamine-6-phosphate deacetylase-like protein, putative | 30949                             | 182   | 6     | 3.1E-03 | R.LDGVGSIER.G                  | 1            |                                       |                            |
|            |                                                                    |                                   |       |       |         | 1.4E-01                        |              | R.LLRPSVSHM.- + Oxidation (M)         |                            |
|            |                                                                    |                                   |       |       |         | 1.2E-01                        |              | R.IMTISPHIDAR.S                       |                            |
|            |                                                                    |                                   |       |       |         | 3.9E-02                        |              | R.IMTISPHIDAR.S + Oxidation (M)       |                            |
|            |                                                                    |                                   |       |       |         | 8.0E-05                        |              | R.SNYELIGYLLR.L                       |                            |
|            |                                                                    |                                   |       |       |         | 5.2E-08                        |              | K.ANILILNSELNTITK.R                   |                            |
| EAN97586.1 | mitochondrial processing peptidase alpha subunit, putative         | 53421                             | 180   | 4     | 6.2E-05 | K.YATALVAR.E                   | 0            |                                       |                            |
|            |                                                                    |                                   |       |       |         | 6.1E-05                        |              | K.FGQPSLTRA                           |                            |
|            |                                                                    |                                   |       |       |         | 2.4E-04                        |              | K.VKDDEVAAGR.A                        |                            |
|            |                                                                    |                                   |       |       |         | 1.2E-03                        |              | K.EIAGFLDAAR.G                        |                            |
| EAN99748.1 | isocitrate dehydrogenase, putative                                 | 47184                             | 164   | 4     | 5.1E-04 | R.HAFGDQYR.A                   | 0            |                                       |                            |
|            |                                                                    |                                   |       |       |         | 3.4E-02                        |              | K.LVQFSMLLEK.V + Oxidation (M)        |                            |
|            |                                                                    |                                   |       |       |         | 5.3E-07                        |              | R.TVEAEAAHGTVTR.H                     |                            |
|            |                                                                    |                                   |       |       |         | 5.9E-04                        |              | R.DKTDDQVTVDAHAIAK.K                  |                            |
| EAN96060.1 | glutamamyl carboxypeptidase, putative                              | 44531                             | 157   | 4     | 1.3E-05 | K.LVSFDTTSR.N                  | 0            |                                       |                            |
|            |                                                                    |                                   |       |       |         | 1.3E-03                        |              | K.AYVNDTLLPSMK.K + Oxidation (M)      |                            |
|            |                                                                    |                                   |       |       |         | 3.3E-05                        |              | R.YLPEAEAEKFEER.I                     |                            |
| EAN85113.1 | elongation factor 1-gamma (EF-1-gamma), putative                   | 47053                             | 148   | 5     | 1.3E-01 | R.TFLVGER.M                    | 0            |                                       |                            |
|            |                                                                    |                                   |       |       |         | 4.5E-01                        |              | R.SQGATFGPVK.A                        |                            |
|            |                                                                    |                                   |       |       |         | 1.2E-05                        |              | R.ALEAWLETR.T                         |                            |

| Band no. | Accession no. | Protein Identity                            | Mr    | SCORE | # PEPT. | Mascot  |                                    | Additional copies |
|----------|---------------|---------------------------------------------|-------|-------|---------|---------|------------------------------------|-------------------|
|          |               |                                             |       |       |         | E-value | Sequence                           |                   |
| 11 cont. | EAN85113.1    | cont.                                       |       |       |         | 7.3E-04 | R.LYNTVMQQPK.T + Oxidation (M)     |                   |
|          |               |                                             |       |       |         | 2.8E-03 | K.AAAAAADGAEEDAPREK.K              |                   |
|          | EAN85055.1    | histone H4, putative                        | 11177 | 142   | 4       | 5.2E-01 | K.SFVEGVVR.D                       | 7                 |
|          |               |                                             |       |       |         | 3.1E-03 | R.ISGIYDEVR.G                      |                   |
|          |               |                                             |       |       |         | 8.4E-05 | R.DATAYTEYSR.K                     |                   |
|          |               |                                             |       |       |         | 6.8E-06 | K.TVTAVDVVNALR.K                   |                   |
|          | EAN86151.1    | RNA helicase, putative                      | 49885 | 121   | 3       | 3.1E-03 | R.DVQTVFLK.T                       | 0                 |
|          |               |                                             |       |       |         | 8.2E-06 | R.IIVATDLFGR.G                     |                   |
|          |               |                                             |       |       |         | 4.9E-04 | K.KFMNNPTEIYVDQR.A + Oxidation (M) |                   |
|          | EAN85395.1    | 3-ketoacyl-CoA thiolase, putative           | 46802 | 119   | 4       | 3.5E-04 | R.VGGDYLR.A                        | 1                 |
|          |               |                                             |       |       |         | 2.7E-02 | K.TAVSTVIANI.-                     |                   |
|          |               |                                             |       |       |         | 9.7E-01 | K.GSPLFIDKK.H                      |                   |
|          |               |                                             |       |       |         | 3.5E-05 | K.MGISPNSSLVVEIK.S + Oxidation (M) |                   |
|          | EAN80947.1    | tryparedoxin peroxidase, putative           | 22886 | 117   | 5       | 4.3E-01 | R.DVDEALR.L                        | 3                 |
|          |               |                                             |       |       |         | 4.9E-02 | K.AFQFVEK.H                        |                   |
|          |               |                                             |       |       |         | 3.5E-04 | R.GLFIIDPK.Q                       |                   |
|          |               |                                             |       |       |         | 2.4E-04 | R.QITVNDLPVGR.D                    |                   |
|          |               |                                             |       |       |         | 2.0E-02 | R.GGLGQMNIPLADK.T + Oxidation (M)  |                   |
|          | EAN83533.1    | histone H2B, putative                       | 12353 | 108   | 3       | 2.9E-02 | R.ELQTAVR.L                        | 1                 |
|          |               |                                             |       |       |         | 4.6E-03 | R.LVLPADLAK.H                      |                   |
|          |               |                                             |       |       |         | 6.6E-07 | R.IASEAATVVR.V                     |                   |
|          | EAN87724.1    | glutamate dehydrogenase, putative           | 45525 | 107   | 4       | 8.2E-02 | K.VLSVSDSR.G                       | 0                 |
|          |               |                                             |       |       |         | 1.5E-02 | K.GLGLQYYAGK.R                     |                   |
|          |               |                                             |       |       |         | 5.8E-05 | K.FLGFEQTFK.N                      |                   |
|          |               |                                             |       |       |         | 3.6E-02 | R.EVGYMAGMTQK.L + Oxidation (M)    |                   |
|          | EAN85190.1    | hypothetical protein, conserved             | 43072 | 105   | 3       | 2.6E-05 | R.VSAYAPTR.K                       | 1                 |
|          |               |                                             |       |       |         | 2.3E-03 | K.ELEEEEDIR.M                      |                   |
|          |               |                                             |       |       |         | 2.0E-02 | M.PLPPLEEEAPR.S                    |                   |
|          | EAN92280.1    | ATP-dependent DEAD/H RNA helicase, putative | 47149 | 103   | 3       | 1.5E-06 | R.ELALQTAQVTK.E                    | 0                 |
|          |               |                                             |       |       |         | 4.7E-04 | K.TASFVIPVLEK.V                    |                   |
|          |               |                                             |       |       |         | 3.7E-01 | R.NVTFEEYGLR.R                     |                   |
|          | EAN87063.1    | hypothetical protein, conserved             | 44364 | 102   | 3       | 4.5E-03 | K.ALTEEWILGR.K                     | 0                 |
|          |               |                                             |       |       |         | 2.6E-06 | K.ANESLDVNLGQYTR.E                 |                   |
|          |               |                                             |       |       |         | 2.2E-01 | K.DLVEAPARPASANAAAGGSGK.K          |                   |
|          | EAN88162.1    | hypothetical protein, conserved             | 39057 | 101   | 3       | 1.7E-01 | K.SNSTIVGR.R                       | 1                 |
|          |               |                                             |       |       |         | 6.7E-05 | R.ATDVVNQR.N                       |                   |
|          |               |                                             |       |       |         | 9.4E-04 | R.DALDVIEEANKK.S                   |                   |
|          | EAN86150.1    | hypothetical protein, conserved             | 47419 | 97    | 5       | 1.0E-02 | R.EQLMER.V + Oxidation (M)         | 0                 |
|          |               |                                             |       |       |         | 5.8E-01 | R.FLAPYDK.N                        |                   |
|          |               |                                             |       |       |         | 5.4E-03 | R.AWDDLFEK.N                       |                   |
|          |               |                                             |       |       |         | 1.5E-03 | K.EVSQEEIAK.L                      |                   |



| Band no. | Accession no. | Protein Identity                                             | Mr     | SCORE | # PEPT. | Mascot  |                                 | Additional copies |
|----------|---------------|--------------------------------------------------------------|--------|-------|---------|---------|---------------------------------|-------------------|
|          |               |                                                              |        |       |         | E-value | Sequence                        |                   |
| 11 cont. | EAN86150.1    | cont.                                                        |        |       |         | 5.5E-01 | R.SIPSYLTDTK.W                  |                   |
|          | EAN91858.1    | hypothetical protein, conserved                              | 45957  | 96    | 1       | 9.6E-10 | K.LAQAANTSTTATSSGTK.D           | 0                 |
|          | EAN99391.1    | hypothetical protein, conserved                              | 48903  | 96    | 3       | 3.3E-01 | R.NLIAYAER.H                    | 0                 |
|          |               |                                                              |        |       |         | 1.2E-04 | R.EGFFVGVLNAR.G                 |                   |
|          |               |                                                              |        |       |         | 3.1E-04 | R.LPGVDTQLLFK.G                 |                   |
|          | EAN86592.1    | nucleolar RNA-binding protein, putative                      | 38208  | 94    | 2       | 9.3E-04 | K.IPEEHALR.L                    | 2                 |
|          |               |                                                              |        |       |         | 6.8E-06 | K.QFTIATLDPK.K                  |                   |
|          | EAN99098.1    | hypothetical protein, conserved                              | 62079  | 94    | 2       | 7.9E-04 | K.AALLAYLEK.K                   | 0                 |
|          |               |                                                              |        |       |         | 5.0E-07 | K.ALTGV TALGGFNK.E              |                   |
|          | EAN82747.1    | Gim5A protein, putative                                      | 27268  | 93    | 3       | 9.3E-02 | K.LHLSDTV.R.G                   | 2                 |
|          |               |                                                              |        |       |         | 8.5E-01 | K.ALLPEDAEK.K                   |                   |
|          |               |                                                              |        |       |         | 3.1E-08 | R.LSLLLNALSSK.T                 |                   |
|          | EAN84918.1    | ATPase alpha subunit, putative                               | 24506  | 87    | 3       | 3.0E-03 | R.FVALFNQK.Q                    | 0                 |
|          |               |                                                              |        |       |         | 9.3E-05 | R.VGSSAQNVAMK.G + Oxidation (M) |                   |
|          |               |                                                              |        |       |         | 1.5E-01 | K.FYEYLLVHK.D                   |                   |
|          | EAN91887.1    | mitochondrial DNA polymerase beta, putative                  | 45752  | 78    | 2       | 6.5E-04 | K.LGSPEEVK.A                    | 1                 |
|          |               |                                                              |        |       |         | 1.0E-04 | R.SVPTALLTFTGSK.N               |                   |
|          | EAN88244.1    | phosphoinositide-binding protein, putative                   | 48519  | 77    | 3       | 1.2E-03 | K.IVGSQSASR.L                   | 1                 |
|          |               |                                                              |        |       |         | 2.2E-02 | R.ASTTLSTYAQK.D                 |                   |
|          |               |                                                              |        |       |         | 2.1E-02 | R.LYIQQLEDSIK.M                 |                   |
|          | EAN89176.1    | NADH dehydrogenase, putative                                 | 56934  | 76    | 2       | 1.3E-01 | R.IQPALATLPNR.F                 | 1                 |
|          |               |                                                              |        |       |         | 6.7E-08 | K.LPLPTLA AVASR.Q               |                   |
|          | EAN84370.1    | heat shock 70 kDa protein, mitochondrial precursor, putative | 71585  | 75    | 3       | 9.3E-02 | R.SKFE SLAEK.L                  | 0                 |
|          |               |                                                              |        |       |         | 1.5E-03 | R.VLENTEGFR.T                   |                   |
|          |               |                                                              |        |       |         | 1.3E-02 | K.DAGTIAGLNVIR.V                |                   |
|          | EAN90081.1    | ATP-dependent RNA helicase, putative                         | 69157  | 74    | 1       | 1.8E-07 | R.VGSTTENITQDVR.W               | 1                 |
|          | EAN85276.1    | hypothetical protein                                         | 52756  | 72    | 2       | 2.8E-02 | R.DADLSLPGR.S                   | 1                 |
|          |               |                                                              |        |       |         | 1.5E-05 | R.FADANEENVPAQVNR.V             |                   |
|          | EAN83474.1    | retrotransposon hot spot (RHS) protein, putative             | 106086 | 72    | 2       | 3.6E-02 | R.VLIGTPGIGK.S                  | 3                 |
|          |               |                                                              |        |       |         | 1.5E-05 | K.LNDFLLLR.F                    |                   |
|          | EAN86114.1    | cysteine desulfurase, putative                               | 49300  | 70    | 2       | 1.0E-04 | R.AEVADLIGTSPK.G                | 1                 |
|          |               |                                                              |        |       |         | 9.4E-03 | R.ALGIDAENAHTSIR.F              |                   |
|          | EAN83019.1    | cystathionine beta-synthase                                  | 44273  | 68    | 1       | 3.7E-07 | K.EVTLQALGAEVIR.T               | 8                 |
|          | EAN88684.1    | heat shock protein DnaJ, putative                            | 45029  | 67    | 2       | 4.6E-03 | K.IFEIFVEK.G                    | 0                 |
|          |               |                                                              |        |       |         | 2.7E-04 | R.GEGDQIPGVR.L                  |                   |
|          | EAN82629.1    | heat shock protein 85, putative                              | 81244  | 65    | 2       | 2.5E-05 | K.AISNDWEEPLSTK.H               | 3                 |
|          |               |                                                              |        |       |         | 1.3E-01 | R.GVVDS EDLPLNISR.E             |                   |
|          | EAN87340.1    | RNA-binding protein, putative                                | 50174  | 59    | 1       | 3.5E-06 | R.NIAENTTEQQLR.E                | 1                 |
|          | EAO00026.1    | elongation factor TU, putative                               | 52462  | 58    | 2       | 4.8E-02 | K.ALEGDAENEGK.I                 | 1                 |
|          |               |                                                              |        |       |         | 1.1E-04 | K.IVGSGETVNL SK.E               |                   |

| Band no. | Accession no. | Protein Identity                                                                          | Mr    | SCORE | # PEPT. | E-value | Mascot                          | Additional copies |
|----------|---------------|-------------------------------------------------------------------------------------------|-------|-------|---------|---------|---------------------------------|-------------------|
|          |               |                                                                                           |       |       |         |         | Sequence                        |                   |
| 11 cont. | EAN94510.1    | mitochondrial processing peptidase, beta subunit, putative                                | 55057 | 56    | 2       | 3.3E-04 | R.AVGLLDVVVR.N                  | 1                 |
|          |               |                                                                                           |       |       |         |         | 4.2E-02                         |                   |
|          | EAN89594.1    | metal-ion transporter, putative                                                           | 50934 | 55    | 2       | 6.0E-03 | R.MPAAVAAITR.Q + Oxidation (M)  | 0                 |
|          |               |                                                                                           |       |       |         | 8.5E-03 | R.GGSGGEVVADAVLASSR.R           |                   |
|          | EAN86224.1    | hypothetical protein, conserved                                                           | 56869 | 53    | 1       | 5.9E-06 | R.LPALEQIVVGSR.R                | 1                 |
|          | EAN90413.1    | ADP,ATP carrier protein 1, mitochondrial precursor, putative                              | 35303 | 50    | 1       | 4.2E-05 | K.LLVQNQGEMIK.Q + Oxidation (M) | 1                 |
|          | EAN86269.1    | 60S ribosomal protein L19, putative                                                       | 37755 | 49    | 2       | 1.7E-01 | R.EDAAAAAAAK.Q                  | 3                 |
|          |               |                                                                                           |       |       |         | 3.5E-03 | R.QLAEQLAAK.R                   |                   |
|          | EAN81976.1    | elongation factor 2, putative                                                             | 19244 | 48    | 1       | 2.7E-05 | K.STLSDSLVAAGIHK.M              | 3                 |
|          | EAN99332.1    | RAB GDP dissociation inhibitor alpha, putative                                            | 50517 | 47    | 1       | 9.2E-05 | K.LIVGDPSYFPDR.V                | 0                 |
|          | EAN85839.1    | hypothetical protein, conserved                                                           | 86830 | 47    | 1       | 5.0E-05 | R.SVVSNALEEVLR.H                | 1                 |
|          | EAN86428.1    | hypothetical protein, conserved                                                           | 50343 | 47    | 2       | 3.0E-01 | R.VVYVSSAAHR.F                  | 1                 |
|          |               |                                                                                           |       |       |         | 1.4E-03 | R.FVDQFQATYK.R                  |                   |
|          | EAN81897.1    | 2-oxoglutarate dehydrogenase, E2 component, dihydrolipoamid succinyltransferase, putative | 42903 | 44    | 1       | 8.2E-05 | R.LIDGSDAVTFLVK.V               | 1                 |
|          | EAN97592.1    | chaperone DnaJ protein, putative                                                          | 47563 | 43    | 1       | 2.1E-04 | K.ALGVTESFPR.V                  | 0                 |
|          | EAN80692.1    | farnesyl synthetase, putative                                                             | 32609 | 42    | 1       | 1.3E-04 | R.AVLAGDFLLAR.A                 | 1                 |
|          | EAN87271.1    | glycosomal membrane protein, putative                                                     | 24137 | 41    | 1       | 2.9E-04 | K.SVSSSITDGR.S                  | 1                 |
|          | EAN91644.1    | GTP-binding protein, putative                                                             | 44891 | 41    | 2       | 2.9E-02 | K.STFFNVLSK.K                   | 1                 |
|          |               |                                                                                           |       |       |         | 5.2E-03 | K.VGIVGLPNVGK.S                 |                   |
|          | EAN92675.1    | hypothetical protein, conserved                                                           | 51070 | 40    | 2       | 1.5E-03 | R.NILFSLAR.Q                    | 1                 |
|          |               |                                                                                           |       |       |         | 9.1E-01 | R.DLYVTAERPKN                   |                   |
|          | EAN88187.1    | hypothetical protein, conserved                                                           | 43723 | 37    | 1       | 9.3E-04 | R.TVTLDFGQNK.L                  | 1                 |
|          | EAN83495.1    | 40S ribosomal protein S3a, putative                                                       | 28554 | 35    | 1       | 1.1E-03 | K.FVVQEVQGR.N                   | 4                 |
|          | EAO00028.1    | citrate synthase, putative                                                                | 53081 | 34    | 1       | 7.5E-04 | R.TPYLAAAIYNR.L                 | 1                 |
|          | EAN87845.1    | 40S ribosomal protein S4, putative                                                        | 30998 | 32    | 1       | 1.5E-03 | K.VENVYTSTGR.I                  | 2                 |
|          | EAN88420.1    | chaperone DnaJ protein, putative                                                          | 49727 | 31    | 1       | 1.5E-03 | R.GPAQVQPIEVK.L                 | 1                 |
|          | EAN87580.1    | cytosolic leucyl aminopeptidase, putative                                                 | 62519 | 31    | 1       | 6.5E-04 | R.LILADTLTFVQR.D                | 1                 |
|          | EAN81197.1    | hypothetical protein, conserved                                                           | 30269 | 30    | 1       | 1.7E-03 | R.SYTTSFVTPIPK.C                | 3                 |
|          | EAN86097.1    | fructose-bisphosphate aldolase, glycosomal, putative                                      | 41279 | 27    | 1       | 3.3E-03 | K.ASTGETFVQLLQR.K               | 2                 |
|          | EAN86375.1    | centromere/microtubule binding protein cbf5, putative                                     | 49155 | 26    | 1       | 2.2E-03 | K.NYDQMNVR.S + Oxidation (M)    | 1                 |
|          | EAN92888.1    | acyl-CoA dehydrogenase, putative                                                          | 69549 | 25    | 1       | 6.1E-03 | K.GISLFLVPR.H                   | 0                 |
|          | EAN83903.1    | flagellar protofilament ribbon protein, putative                                          | 46306 | 25    | 2       | 3.1E-01 | R.IYEVEVER.N                    | 1                 |
|          |               |                                                                                           |       |       |         | 9.4E-02 | R.DWAQQQVEEK.L                  |                   |
|          | EAN98359.1    | lanosterol 14-alpha-demethylase, putative                                                 | 55343 | 25    | 1       | 8.8E-04 | K.ILGEIIVAR.E                   | 1                 |
|          | EAN87059.1    | hypothetical protein, conserved                                                           | 21263 | 25    | 1       | 1.1E-02 | K.SVGLTAAALSPK.Q                | 0                 |

| Band no.   | Accession no.                                     | Protein Identity                                   | Mr    | SCORE | # PEPT. | E-value                         | Mascot                              | Additional copies |
|------------|---------------------------------------------------|----------------------------------------------------|-------|-------|---------|---------------------------------|-------------------------------------|-------------------|
|            |                                                   |                                                    |       |       |         |                                 | Sequence                            |                   |
| 11 cont.   | EAN96768.1                                        | hypothetical protein, conserved                    | 26779 | 24    | 1       | 7.0E-03                         | -.MLFLYR.R + Oxidation (M)          | 0                 |
|            | EAN90286.1                                        | glyceraldehyde 3-phosphate dehydrogenase, putative | 39292 | 24    | 2       | 8.3E-02                         | K.AVGMVIPSTQGK.L + Oxidation (M)    | 3                 |
|            |                                                   |                                                    |       |       |         | 6.5E-01                         | R.DTSIQEIDAALKR.A                   |                   |
|            | EAN98432.1                                        | nucleolar RNA binding protein, putative            | 55470 | 23    | 1       | 5.4E-03                         | K.IVNDNLLYAK.I                      | 0                 |
| EAN85214.1 | hypothetical protein, conserved                   | 21287                                              | 20    | 1     | 1.9E-02 | K.HALSSFLK.D                    | 1                                   |                   |
| Band 12    | EAN84978.1                                        | elongation factor 1-alpha (EF-1-alpha), putative   | 49652 | 862   | 24      | 1.4E-06                         | K.SGDAAMVR.M                        | 1                 |
|            |                                                   |                                                    |       |       |         | 1.6E-04                         | K.VGYNVEK.V                         |                   |
|            |                                                   |                                                    |       |       |         | 2.9E-04                         | K.FAEIESK.I                         |                   |
|            |                                                   |                                                    |       |       |         | 6.9E-03                         | K.YAWVLDK.L                         |                   |
|            |                                                   |                                                    |       |       |         | 2.6E-02                         | R.TIEKFEK.E                         |                   |
|            |                                                   |                                                    |       |       |         | 3.1E-04                         | R.QTVAVGIIK.A                       |                   |
|            |                                                   |                                                    |       |       |         | 1.6E-03                         | K.SVNFAQER.Y                        |                   |
|            |                                                   |                                                    |       |       |         | 7.8E-05                         | R.LPLQDVYK.I                        |                   |
|            |                                                   |                                                    |       |       |         | 2.5E-06                         | K.IGGIGTVPVGR.V                     |                   |
|            |                                                   |                                                    |       |       |         | 5.4E-04                         | K.SENMPWYK.G                        |                   |
|            |                                                   |                                                    |       |       |         | 3.2E-03                         | K.SENMPWYK.G + Oxidation (M)        |                   |
|            |                                                   |                                                    |       |       |         | 2.8E-03                         | K.STATGHLIYK.C                      |                   |
|            |                                                   |                                                    |       |       |         | 6.5E-04                         | K.FEKEAAEIGK.S                      |                   |
|            |                                                   |                                                    |       |       |         | 1.0E-02                         | R.GITIDIALWK.F                      |                   |
|            |                                                   |                                                    |       |       |         | 3.7E-03                         | R.EHALLAFTLGVK.Q                    |                   |
|            |                                                   |                                                    |       |       |         | 4.2E-03                         | K.MDDKSVNFAQER.Y + Oxidation (M)    |                   |
|            |                                                   |                                                    |       |       |         | 1.0E-04                         | K.VHMNLVVVGHVDAGK.S                 |                   |
|            |                                                   |                                                    |       |       |         | 2.4E-05                         | K.VHMNLVVVGHVDAGK.S + Oxidation (M) |                   |
|            |                                                   |                                                    |       |       |         | 8.3E-03                         | R.FIPISGWQGNMIDK.S                  |                   |
|            |                                                   |                                                    |       |       |         | 3.1E-08                         | R.FIPISGWQGNMIDK.S + Oxidation (M)  |                   |
| 7.7E-03    | R.VETGTMKPGDVVTFAPANVTTEVK.S                      |                                                    |       |       |         |                                 |                                     |                   |
| 4.9E-03    | R.VETGTMKPGDVVTFAPANVTTEVK.S + Oxidation (M)      |                                                    |       |       |         |                                 |                                     |                   |
| 7.9E-07    | K.SIEMHHEQLAEATPGDNVGFNVK.N + Oxidation (M)       |                                                    |       |       |         |                                 |                                     |                   |
| 1.0E-07    | K.NMITGTSQADAAVLVIASSQGEFEAGISK.D + Oxidation (M) |                                                    |       |       |         |                                 |                                     |                   |
| EAN82858.1 | elongation factor 1-alpha (EF-1-alpha), putative  | 49694                                              | 843   | 25    | 3.4E-03 | K.SIEMHHEQLVEATPGDNVGFNVK.N     | 1                                   |                   |
| EAN94839.1 | beta tubulin, put                                 | 50520                                              | 777   | 24    | 5.7E-01 | R.EEYPDR.I                      | 0                                   |                   |
|            |                                                   |                                                    |       |       | 3.2E-05 | K.NMMQAADPR.H                   |                                     |                   |
|            |                                                   |                                                    |       |       | 2.1E-03 | R.YLTASALFR.G                   |                                     |                   |
|            |                                                   |                                                    |       |       | 5.6E-04 | K.NMMQAADPR.H + Oxidation (M)   |                                     |                   |
|            |                                                   |                                                    |       |       | 1.4E-04 | K.NMMQAADPR.H + 2 Oxidation (M) |                                     |                   |
|            |                                                   |                                                    |       |       | 1.4E-06 | K.LAVNLVPPRL.L                  |                                     |                   |
|            |                                                   |                                                    |       |       | 1.2E-05 | R.FPGQLNSDLR.K                  |                                     |                   |
|            |                                                   |                                                    |       |       | 2.9E-07 | R.VGEQFTAMFR.R + Oxidation (M)  |                                     |                   |

| Band no. | Accession no. | Protein Identity              | Mr    | SCORE | # PEPT. | E-value | Mascot<br>Sequence                             | Additional copies |
|----------|---------------|-------------------------------|-------|-------|---------|---------|------------------------------------------------|-------------------|
| 12 cont. | EAN94839.1    | cont.                         |       |       |         | 5.6E-06 | R.KLAVNLVFPRL                                  |                   |
|          |               |                               |       |       |         | 6.7E-03 | R.FPGQLNSDLRK.L                                |                   |
|          |               |                               |       |       |         | 3.9E-09 | R.INVYFDEATGGR.Y                               |                   |
|          |               |                               |       |       |         | 1.0E-03 | R.RVGEQFTAMFR.R + Oxidation (M)                |                   |
|          |               |                               |       |       |         | 3.2E-05 | R.IMMTFSIIPSPK.V                               |                   |
|          |               |                               |       |       |         | 1.3E-04 | R.IMMTFSIIPSPK.V + Oxidation (M)               |                   |
|          |               |                               |       |       |         | 1.1E-04 | R.IMMTFSIIPSPK.V + 2 Oxidation (M)             |                   |
|          |               |                               |       |       |         | 2.7E-06 | R.AVLIDLEPGTMDSVR.A                            |                   |
|          |               |                               |       |       |         | 1.3E-05 | R.AVLIDLEPGTMDSVR.A + Oxidation (M)            |                   |
|          |               |                               |       |       |         | 3.4E-02 | R.LHFFMMGFAPLTSR.G                             |                   |
|          |               |                               |       |       |         | 6.5E-03 | R.GLSVPELTQQMFDK.N                             |                   |
|          |               |                               |       |       |         | 5.1E-04 | R.LHFFMMGFAPLTSR.G + Oxidation (M)             |                   |
|          |               |                               |       |       |         | 5.6E-05 | R.GLSVPELTQQMFDK.N + Oxidation (M)             |                   |
|          |               |                               |       |       |         | 2.3E-06 | R.LHFFMMGFAPLTSR.G + 2 Oxidation (M)           |                   |
|          |               |                               |       |       |         | 2.7E-04 | K.NSSYFIEWIPNNIK.S                             |                   |
|          |               |                               |       |       |         | 3.2E-06 | K.FWEVISDEHGVDPTGTYQGDSDLQLER.I                |                   |
|          | EAN81053.1    | alpha tubulin, put            | 50549 | 740   | 17      | 4.9E-04 | R.EDLAALEK.D                                   | 0                 |
|          |               |                               |       |       |         | 4.1E-03 | R.LSVDYGKK.S                                   |                   |
|          |               |                               |       |       |         | 5.3E-06 | K.DVNAAVATIK.T                                 |                   |
|          |               |                               |       |       |         | 1.2E-02 | R.QLFHPEQLISGK.E                               |                   |
|          |               |                               |       |       |         | 1.0E-03 | R.IDHKFDLMYSK.R + Oxidation (M)                |                   |
|          |               |                               |       |       |         | 5.2E-09 | R.LIGQVVSALTASLR.F                             |                   |
|          |               |                               |       |       |         | 1.3E-05 | R.TIQFVDWSPTGFK.C                              |                   |
|          |               |                               |       |       |         | 1.4E-03 | K.RTIQFVDWSPTGFK.C                             |                   |
|          |               |                               |       |       |         | 2.6E-07 | R.AVFLDLEPTVVDEIR.T                            |                   |
|          |               |                               |       |       |         | 2.5E-03 | R.NLDIERPTYTNLNR.L                             |                   |
|          |               |                               |       |       |         | 9.0E-08 | R.IHFVLTSYAPVISA EK.A                          |                   |
|          |               |                               |       |       |         | 8.9E-04 | K.CGINYQPPTVVPGGDLAK.V                         |                   |
|          |               |                               |       |       |         | 4.3E-09 | K.TIGVEDDAFNFFSETGAGK.H                        |                   |
|          |               |                               |       |       |         | 2.4E-05 | R.QLFHPEQLISGKEDAANNYAR.G                      |                   |
|          |               |                               |       |       |         | 3.9E-03 | K.AYHEQLSVSEISNAVFEPASMMTK.C                   |                   |
|          |               |                               |       |       |         | 7.4E-05 | K.AYHEQLSVSEISNAVFEPASMMTK.C + Oxidation (M)   |                   |
|          |               |                               |       |       |         | 2.4E-05 | K.AYHEQLSVSEISNAVFEPASMMTK.C + 2 Oxidation (M) |                   |
|          | EAN95983.1    | ATPase beta subunit, putative | 55980 | 723   | 14      | 4.2E-04 | R.MPIHAVAPK.L                                  | 0                 |
|          |               |                               |       |       |         | 6.1E-04 | K.VIDLKGD SK.C                                 |                   |
|          |               |                               |       |       |         | 3.5E-04 | K.IGLFGGAGVGK.T                                |                   |
|          |               |                               |       |       |         | 4.1E-02 | R.MPIHAVAPK.L + Oxidation (M)                  |                   |
|          |               |                               |       |       |         | 3.4E-05 | K.MAE EAELEK.L + Oxidation (M)                 |                   |
|          |               |                               |       |       |         | 5.3E-04 | K.KMAE EAELEK.L                                |                   |
|          |               |                               |       |       |         | 5.4E-06 | K.VVSSGGNISVPVGR.E                             |                   |
|          |               |                               |       |       |         | 4.4E-05 | R.IFNVLGDAIDQR.G                               |                   |
|          |               |                               |       |       |         | 2.5E-06 | K.TVIIMELINNVAK.G + Oxidation (M)              |                   |

| Band no.   | Accession no.                                                  | Protein Identity | Mr    | SCORE | # PEPT. | E-value    | Mascot                                   | Additional copies |
|------------|----------------------------------------------------------------|------------------|-------|-------|---------|------------|------------------------------------------|-------------------|
|            |                                                                |                  |       |       |         |            | Sequence                                 |                   |
| 12 cont.   | EAN95983.1                                                     | cont.            |       |       |         | 1.1E-06    | R.VAQSALTMAEYFR.D                        |                   |
|            |                                                                |                  |       |       |         | 2.8E-11    | R.FTQANSEVSALLGR.I                       |                   |
|            |                                                                |                  |       |       |         | 8.8E-06    | R.VAQSALTMAEYFR.D + Oxidation (M)        |                   |
|            |                                                                |                  |       |       |         | 4.9E-09    | K.LADQAAEDTILTTGIK.V                     |                   |
|            |                                                                |                  |       |       |         | 3.7E-10    | R.IPAAVGYQPTLAEDLGQLQER.I                |                   |
| EAO00202.1 | 6-phospho-1-fructokinase, putative                             |                  | 54100 | 438   | 11      | 4.7E-03    | R.FGYWGLSK.K                             | 0                 |
|            |                                                                |                  |       |       |         | 6.0E-05    | R.YGGTILGSSR.G                           |                   |
|            |                                                                |                  |       |       |         | 9.0E-05    | R.ELEAISLVR.E                            |                   |
|            |                                                                |                  |       |       |         | 4.9E-04    | K.LTDIGVVLTK.R                           |                   |
|            |                                                                |                  |       |       |         | 1.6E-03    | R.TFGFETAVDK.A                           |                   |
|            |                                                                |                  |       |       |         | 9.4E-03    | K.YIDPSYMR.A + Oxidation (M)             |                   |
|            |                                                                |                  |       |       |         | 7.9E-07    | R.SLTLTAVNAYR.V                          |                   |
|            |                                                                |                  |       |       |         | 2.3E-05    | R.YNSYILVPIK.V                           |                   |
|            |                                                                |                  |       |       |         | 4.5E-04    | R.EITVGLQDDVR.A                          |                   |
|            |                                                                |                  |       |       |         | 5.1E-05    | R.GPQDTSEMVDTLER.L                       |                   |
|            |                                                                |                  |       |       |         | 9.4E-09    | R.GPQDTSEMVDTLER.L + Oxidation (M)       |                   |
| EAN91609.1 | vacuolar-type proton translocating pyrophosphatase 1, putative |                  | 86135 | 384   | 10      | 6.7E-01    | K.AFQTAFR.G                              | 1                 |
|            |                                                                |                  |       |       |         | 2.0E-02    | R.NVYVISR.R                              |                   |
|            |                                                                |                  |       |       |         | 3.9E-01    | R.NIPEDDAR.N                             |                   |
|            |                                                                |                  |       |       |         | 2.3E-03    | K.AADVGADLVGK.V                          |                   |
|            |                                                                |                  |       |       |         | 1.0E-04    | R.NAYLTDEVMR.N                           |                   |
|            |                                                                |                  |       |       |         | 2.0E-05    | R.VGIPTINILDAR.V                         |                   |
|            |                                                                |                  |       |       |         | 7.7E-07    | K.SVGLAAMDVMVNEIR.R                      |                   |
|            |                                                                |                  |       |       |         | 7.4E-05    | K.SVGLAAMDVMVNEIR.R + 2 Oxidation (M)    |                   |
|            |                                                                |                  |       |       |         | 3.9E-08    | R.EITDALDAAGNTTAAIGK.G                   |                   |
|            |                                                                |                  |       |       |         | 2.6E-08    | R.TAVMATEGSEEGDQSLGFAK.A + Oxidation (M) |                   |
| EAN89593.1 | hypothetical protein                                           |                  | 52619 | 377   | 10      | 3.0E-03    | R.LEQPSDK.H                              | 0                 |
|            |                                                                |                  |       |       |         | 1.3E-03    | R.DADLSLGR.S                             |                   |
|            |                                                                |                  |       |       |         | 2.3E+00    | K.YRDLWTLR.R                             |                   |
|            |                                                                |                  |       |       |         | 1.2E-02    | K.GNMLAWYMR.T + 2 Oxidation (M)          |                   |
|            |                                                                |                  |       |       |         | 1.5E-08    | R.VQTALSMLVLMR.Q + Oxidation (M)         |                   |
|            |                                                                |                  |       |       |         | 2.0E-05    | R.VQTALSMLVLMR.Q + 2 Oxidation (M)       |                   |
|            |                                                                |                  |       |       |         | 1.8E-04    | R.IIAKPSVVDIDYK.A                        |                   |
|            |                                                                |                  |       |       |         | 1.1E-04    | K.SLHYSTMEVDASK.K + Oxidation (M)        |                   |
|            |                                                                |                  |       |       |         | 7.1E-08    | R.FADANEENVPAAQVNR.V                     |                   |
|            |                                                                |                  |       |       |         | 3.5E-05    | R.SNSEEYPDILFVPTLER.F                    |                   |
|            |                                                                |                  |       |       |         | EAO00026.1 | elongation factor TU, putative           |                   |
| 3.7E-01    | K.EAELKEFEK.T                                                  |                  |       |       |         |            |                                          |                   |
| 7.0E-06    | K.ALEGDAENEGK.I                                                |                  |       |       |         |            |                                          |                   |
| 2.3E-06    | K.IVGSGETVNLSK.E                                               |                  |       |       |         |            |                                          |                   |
| 1.3E-08    | K.VGADAELSGFSAK.K                                              |                  |       |       |         |            |                                          |                   |

| Band no. | Accession no. | Protein Identity                                    | Mr     | SCORE | # PEPT. | E-value | Mascot                                | Additional copies |
|----------|---------------|-----------------------------------------------------|--------|-------|---------|---------|---------------------------------------|-------------------|
|          |               |                                                     |        |       |         |         | Sequence                              |                   |
| 12 cont. | EAO00026.1    | cont.                                               |        |       |         | 1.2E-10 | K.TTLTSAITTVLSK.H                     |                   |
|          |               |                                                     |        |       |         | 2.9E-03 | K.YKFPAEETPFVR.G                      |                   |
|          | EAN90443.1    | dihydrolipoyl dehydrogenase, putative               | 51408  | 339   | 8       | 5.0E-04 | K.FPFNANSR.A                          | 1                 |
|          |               |                                                     |        |       |         | 5.5E-04 | K.AVSTEDGFVK.V                        |                   |
|          |               |                                                     |        |       |         | 6.8E-04 | R.RPFTGGLGLDK.I                       |                   |
|          |               |                                                     |        |       |         | 2.1E-03 | K.GLTGGVEYLFK.K                       |                   |
|          |               |                                                     |        |       |         | 4.1E-05 | K.VVLSSTGALALPR.V                     |                   |
|          |               |                                                     |        |       |         | 1.8E-07 | K.GEGSFETAHSIR.V                      |                   |
|          |               |                                                     |        |       |         | 6.9E-07 | R.YGLMGGEGVTMDSAK.M + 2 Oxidation (M) |                   |
|          |               |                                                     |        |       |         | 3.2E-02 | K.TIIATGSEPTLPLPFDEK.V                |                   |
|          | EAN85276.1    | hypothetical protein                                | 52756  | 332   | 10      | 4.3E-05 | R.TDNETDFMK.I + Oxidation (M)         | 0                 |
|          |               |                                                     |        |       |         | 2.6E-03 | R.LSVLASQLGIK.L                       |                   |
|          |               |                                                     |        |       |         | 1.4E-01 | R.IIARPSVVDIDYK.A                     |                   |
|          | EAN98352.1    | pyruvate phosphate dikinase, putative               | 101833 | 302   | 9       | 4.6E-03 | R.GDFLGIFR.T                          | 1                 |
|          |               |                                                     |        |       |         | 6.2E-03 | K.GLIYAGQLK.L                         |                   |
|          |               |                                                     |        |       |         | 1.7E-01 | R.EGDYITLDGSK.G                       |                   |
|          |               |                                                     |        |       |         | 2.7E-06 | K.TAEETLAAAGQR.V                      |                   |
|          |               |                                                     |        |       |         | 1.1E-03 | K.GLPQEVVEQVK.A                       |                   |
|          |               |                                                     |        |       |         | 2.2E-01 | K.KFVYYFGGQK.A                        |                   |
|          |               |                                                     |        |       |         | 7.2E-04 | R.EMILADTLEGR.K                       |                   |
|          |               |                                                     |        |       |         | 1.4E-04 | R.EMILADTLEGR.K + Oxidation (M)       |                   |
|          |               |                                                     |        |       |         | 5.5E-09 | R.LETSPEDLAGMDAAR.G + Oxidation (M)   |                   |
|          | EAN87141.1    | hexokinase, putative <b>carry over</b>              | 52750  | 288   | 7       | 1.1E-03 | K.APEDLNR.T                           | 1                 |
|          |               |                                                     |        |       |         | 3.0E+00 | R.MLPSYVYK.T + Oxidation (M)          |                   |
|          |               |                                                     |        |       |         | 6.5E-03 | K.FMGMISADR.M + 2 Oxidation (M)       |                   |
|          |               |                                                     |        |       |         | 8.6E-06 | R.LNNLLQHIAVK.D                       |                   |
|          |               |                                                     |        |       |         | 3.7E-05 | R.TVPLGFTFSFPTEQK.G                   |                   |
|          |               |                                                     |        |       |         | 6.0E-06 | K.ATGVFYALDLGGTNFR.V                  |                   |
|          |               |                                                     |        |       |         | 1.5E-08 | R.DGSGIGAAFISALVVNDK.-                |                   |
|          | EAN97655.1    | chaperonin HSP60, mitochondrial precursor, putative | 59991  | 214   | 4       | 4.5E-03 | R.GYISPYFVTDK.A                       | 1                 |
|          |               |                                                     |        |       |         | 5.2E-07 | K.AELEDVFLVSAK.K                      |                   |
|          |               |                                                     |        |       |         | 1.1E-08 | R.AVGVILQSVAEQSR.K                    |                   |
|          |               |                                                     |        |       |         | 1.1E-04 | R.AAVQEGIVPGGGVALLR.A                 |                   |
|          | EAN94594.1    | hypothetical protein, conserved                     | 57998  | 193   | 4       | 8.9E-03 | R.SSPVPLLK.L                          | 0                 |
|          |               |                                                     |        |       |         | 3.9E-05 | K.AIEAFALLR.E                         |                   |
|          |               |                                                     |        |       |         | 4.5E-05 | K.LIEGDILER.R                         |                   |
|          |               |                                                     |        |       |         | 8.3E-08 | K.SLDGQGPLLNSTNSHL.-                  |                   |
|          | EAN94854.1    | hypothetical protein, conserved                     | 52674  | 190   | 5       | 1.4E-01 | K.QLAEEQR.L                           | 0                 |
|          |               |                                                     |        |       |         | 4.6E-04 | R.IAVDAVVAR.A                         |                   |
|          |               |                                                     |        |       |         | 6.9E-05 | R.AQLLADYLPK.L                        |                   |
|          |               |                                                     |        |       |         | 1.9E-05 | R.QLQAEQDEFYR.L                       |                   |

| Band no. | Accession no. | Protein Identity                                           | Mr    | SCORE | # PEPT. | E-value                                                                   | Mascot                                                                                                          | Additional copies |
|----------|---------------|------------------------------------------------------------|-------|-------|---------|---------------------------------------------------------------------------|-----------------------------------------------------------------------------------------------------------------|-------------------|
|          |               |                                                            |       |       |         |                                                                           | Sequence                                                                                                        |                   |
| 12 cont. | EAN94854.1    | cont.                                                      |       |       |         | 2.5E-04                                                                   | R.ALQEEAINAYHAEQSR.R                                                                                            |                   |
|          | EAN94510.1    | mitochondrial processing peptidase, beta subunit, putative | 55057 | 169   | 5       | 1.2E-02<br>2.4E-05<br>1.7E-03<br>9.5E-03<br>1.0E-03                       | K.SAGFPEAR.Y<br>R.AVGLLADVVR.N<br>R.LADEDIQAQK.Q<br>K.MLHQHELEQAK.V + Oxidation (M)<br>R.ARPASNHATTQALR.S       | 0                 |
|          | EAN89176.1    | NADH dehydrogenase, putative                               | 56934 | 167   | 4       | 2.0E-05<br>2.0E-01<br>9.3E-10<br>2.4E-03                                  | K.LANLQVLSVR.N<br>R.IQPALATLPNR.F<br>K.LPLPTLAAVASR.Q<br>R.TGLVVWSTGVGPSSTK.D                                   | 1                 |
|          | EAN95887.1    | heat shock protein 70 (HSP70), putative                    | 73607 | 158   | 5       | 1.3E-01<br>4.5E-03<br>1.4E-01<br>1.1E-05<br>2.6E-05                       | R.GTLQPVER.V<br>K.NTVNEPNVAGK.I<br>R.LVSHFTDEFK.R<br>K.VMQLVSDFFGGK.E<br>R.TTPSYVAFTDTER.L                      | 0                 |
|          | EAN98359.1    | lanosterol 14-alpha-demethylase, putative                  | 55343 | 153   | 7       | 5.0E-02<br>5.8E-05<br>9.4E-03<br>4.7E-02<br>3.3E-03<br>1.5E+00<br>1.0E-01 | R.NEILSPR.E<br>K.VGSYVVPK.G<br>R.LLPQSAR.C<br>K.TILATAFR.E<br>R.DPPLLMVMR.M<br>R.EYDFQLLR.D<br>R.VTIVGDPHEHSR.F | 1                 |
|          | EAN81757.1    | mitochondrial processing peptidase, beta subunit, putative | 31341 | 141   | 3       | 6.4E-09                                                                   | R.AAASNFGDLVAASTK.S                                                                                             | 0                 |
|          | EAN94531.1    | hypothetical protein, conserved                            | 57858 | 140   | 4       | 2.3E-02                                                                   | R.RVSDSAFYR.F                                                                                                   | 0                 |
|          | EAN81851.1    | nucleolar protein, putative                                | 31894 | 140   | 4       | 2.2E-04<br>3.0E-02<br>2.2E-07                                             | K.VALLIGSR.S<br>R.ESLQQYLVEK.M<br>K.APASTIQILGAEK.A                                                             | 1                 |
|          | EAN92450.1    | thiolase protein-like protein, putative                    | 48368 | 119   | 4       | 2.3E-02<br>7.3E-01<br>5.1E-03<br>1.9E-07                                  | K.GLAALPAFFK.E<br>K.QLGYPTDISVK.S<br>R.ADQEALAIASHK.N<br>R.LVAPATLSYGLAR.L                                      | 0                 |
|          | EAN97131.1    | cytochrome p450-like protein, putative                     | 58087 | 115   | 3       | 7.2E-06<br>2.9E-04<br>2.8E-02                                             | R.ASFLNLFATK.A<br>K.FVTPLLGGGLVMMMK.D + 3 Oxidation (M)<br>K.AHSDFVIDGHYTVPK.G                                  | 0                 |
|          | EAN96277.1    | hypothetical protein, conserved                            | 54284 | 110   | 2       | 1.6E-04<br>1.6E-06                                                        | R.AFSAALGTLR.A<br>R.LEGLDDLTDEELIK.A                                                                            | 0                 |
|          | EAN99758.1    | poly(A)-binding protein, putative                          | 61726 | 105   | 4       | 4.5E-04<br>5.9E-01<br>4.7E-05<br>1.1E-01                                  | R.SGVTNIVVK.K<br>K.QFTNLYVK.N<br>K.NFDDTVTSER.L<br>K.EVFSAFGEVTSK.V                                             | 0                 |

| Band no.   | Accession no.                                               | Protein Identity     | Mr    | SCORE | # PEPT. | E-value                       | Mascot          | Additional copies                   |                  |
|------------|-------------------------------------------------------------|----------------------|-------|-------|---------|-------------------------------|-----------------|-------------------------------------|------------------|
|            |                                                             |                      |       |       |         |                               | Sequence        |                                     |                  |
| 12 cont.   | EAN85055.1                                                  | histone H4, putative | 11177 | 104   | 3       | 1.1E-01                       | R.ISGHIYDEV.R.G | 7                                   |                  |
|            |                                                             |                      |       |       |         |                               | 1.6E-04         |                                     | R.DATAYTEYSR.K   |
|            |                                                             |                      |       |       |         |                               | 3.7E-05         |                                     | K.TVTAVDVVNALR.K |
| EAN82747.1 | Gim5A protein, putative                                     | 27268                | 98    | 3     | 2.4E-01 | K.LHLSDTV.R.G                 | 2               |                                     |                  |
|            |                                                             |                      |       |       |         | 4.3E-02                       |                 | K.ALLPEDAEK.K                       |                  |
|            |                                                             |                      |       |       |         | 7.0E-08                       |                 | R.LSLLLNALSSK.T                     |                  |
| EAN87824.1 | hypothetical protein, conserved                             | 29236                | 96    | 2     | 2.0E-05 | R.FVFTA.VLPR.F                | 1               |                                     |                  |
|            |                                                             |                      |       |       |         | 8.5E-05                       |                 | K.IINLSAEEIR.A                      |                  |
| EAN93034.1 | thiol-dependent reductase 1, putative                       | 51153                | 94    | 3     | 4.4E-03 | K.AYFGL.VR.D                  | 0               |                                     |                  |
|            |                                                             |                      |       |       |         | 3.4E-05                       |                 | K.DADGSYHVR.F                       |                  |
|            |                                                             |                      |       |       |         | 7.8E-03                       |                 | R.ETVPTLLTPR.G                      |                  |
| EAN80947.1 | tryparedoxin peroxidase, putative                           | 22886                | 90    | 3     | 4.0E-03 | K.AFQFVEK.H                   | 3               |                                     |                  |
|            |                                                             |                      |       |       |         | 4.2E-04                       |                 | R.GLFIIDPK.Q                        |                  |
|            |                                                             |                      |       |       |         | 1.0E-03                       |                 | R.QITVNDLPVGR.D                     |                  |
| EAN87340.1 | RNA-binding protein, putative                               | 50174                | 89    | 4     | 2.5E-01 | R.ENVLPTK.V                   | 0               |                                     |                  |
|            |                                                             |                      |       |       |         | 3.1E-01                       |                 | R.EFVDRR.D                          |                  |
|            |                                                             |                      |       |       |         | 9.4E-02                       |                 | K.GMPPNTNEDDLR.A + Oxidation (M)    |                  |
|            |                                                             |                      |       |       |         | 3.5E-06                       |                 | R.NIAENTTEQQLR.E                    |                  |
| EAN84761.1 | mitochondrial processing peptidase, beta subunit, putative  | 15529                | 84    | 3     | 1.2E+00 | K.IPPTNISTVGK.G               | 0               |                                     |                  |
|            |                                                             |                      |       |       |         |                               |                 |                                     |                  |
| EAN85113.1 | elongation factor 1-gamma (EF-1-gamma), putative            | 47053                | 79    | 3     | 1.9E-03 | R.EYSNTDTR.T                  | 0               |                                     |                  |
|            |                                                             |                      |       |       |         | 3.6E-02                       |                 | R.SQGATFGPVK.A                      |                  |
|            |                                                             |                      |       |       |         | 3.0E-03                       |                 | R.LYNTVMQQPK.T + Oxidation (M)      |                  |
| EAN92822.1 | ribosomal protein L3, putative                              | 48865                | 78    | 3     | 3.4E-01 | R.RPMAPQTSR.K                 | 1               |                                     |                  |
|            |                                                             |                      |       |       |         | 2.6E-06                       |                 | K.SITPMGGFVGYGTVR.N + Oxidation (M) |                  |
|            |                                                             |                      |       |       |         | 3.0E-01                       |                 | K.TIGTVWAHHTSVEFR.R                 |                  |
| EAN94343.1 | eukaryotic peptide chain release factor subunit 1, putative | 51251                | 77    | 3     | 1.1E-02 | K.EQVSGMVTK.L + Oxidation (M) | 0               |                                     |                  |
|            |                                                             |                      |       |       |         | 4.3E-03                       |                 | R.SQEGTQFVR.G                       |                  |
|            |                                                             |                      |       |       |         | 1.0E-02                       |                 | K.LGSFTVELPK.K                      |                  |
| EAN87063.1 | hypothetical protein, conserved                             | 44364                | 75    | 2     | 5.0E-02 | K.ALTEEWILGR.K                | 0               |                                     |                  |
|            |                                                             |                      |       |       |         | 7.8E-06                       |                 | K.ANESLDVLNLGQYTR.E                 |                  |
| EAN82629.1 | heat shock protein 85, putative                             | 81244                | 72    | 2     | 1.6E+00 | K.DVLGDKVEK.V                 | 3               |                                     |                  |
|            |                                                             |                      |       |       |         | 7.4E-07                       |                 | R.GVVDSIDLPLNISR.E                  |                  |
| EAN87979.1 | paraflagellar rod protein 3, putative                       | 69189                | 70    | 3     | 7.4E-01 | R.LIDLIQDK.F                  | 0               |                                     |                  |
|            |                                                             |                      |       |       |         | 4.4E-06                       |                 | R.SQLDATQLAQVPTR.T                  |                  |
|            |                                                             |                      |       |       |         | 6.2E-01                       |                 | R.VVSFTQMIDNAIAK.M + Oxidation (M)  |                  |
| EAN84157.1 | hypothetical protein, conserved                             | 55204                | 67    | 2     | 5.9E-04 | R.VVSASDDATLR.I               | 1               |                                     |                  |
|            |                                                             |                      |       |       |         | 2.7E-03                       |                 | K.SGGSGGGLSVPEAVLR.D                |                  |
| EAN83495.1 | 40S ribosomal protein S3a, putative                         | 28554                | 67    | 1     | 5.0E-07 | K.VNINEAVTLLTR.N              | 4               |                                     |                  |



| Band no.   | Accession no.                                                | Protein Identity                                                                 | Mr    | SCORE | # PEPT.                                  | E-value                                                                           | Mascot                                | Additional copies |
|------------|--------------------------------------------------------------|----------------------------------------------------------------------------------|-------|-------|------------------------------------------|-----------------------------------------------------------------------------------|---------------------------------------|-------------------|
|            |                                                              |                                                                                  |       |       |                                          |                                                                                   | Sequence                              |                   |
| 12 cont.   | EAN85172.1                                                   | eukaryotic translation initiation factor 3 (eIF-3) interacting protein, putative | 56637 | 66    | 2                                        | 9.6E-05<br>1.8E-02                                                                | R.TAEQLYSFLR.L<br>R.GFFGVYQTTTTELVK.T | 1                 |
|            | EAN84370.1                                                   | heat shock 70 kDa protein, mitochondrial precursor, putative                     | 71585 | 64    | 2                                        | 2.5E-02<br>2.1E-04                                                                | R.SKFEFLAEK.L<br>K.STGIDLSNER.M       | 0                 |
| EAN85330.1 | histone H2A, putative                                        | 14385                                                                            | 61    | 2     | 1.3E-03<br>1.8E-03                       | K.AGLIFPVGR.V<br>R.HDDDLGMMLK.D + Oxidation (M)                                   | 10                                    |                   |
| EAO00256.1 | elongation initiation factor 2 alpha subunit, putative       | 48311                                                                            | 57    | 1     | 8.9E-07                                  | K.LLLATLEHTVR.N                                                                   | 0                                     |                   |
| EAN90081.1 | ATP-dependent RNA helicase, putative                         | 69157                                                                            | 56    | 1     | 1.2E-05                                  | R.VGSTTENITQDVR.W                                                                 | 1                                     |                   |
| EAN82311.1 | eukaryotic translation initiation factor 2 subunit, putative | 53257                                                                            | 56    | 2     | 1.2E-01<br>1.1E-04                       | R.LIGWGHIR.R<br>R.LANLVILQNK.I                                                    | 1                                     |                   |
| EAN83533.1 | histone H2B, putative                                        | 12353                                                                            | 55    | 1     | 9.7E-06                                  | K.IVNSFVNDLFR.I                                                                   | 1                                     |                   |
| EAN85586.1 | axoneme central apparatus protein, putative                  | 56894                                                                            | 55    | 2     | 6.4E-03<br>5.4E-03                       | K.AAAAWSLQGQIGR.H<br>K.IENYHVQQVQQS.-                                             | 0                                     |                   |
| EAN81839.1 | hypothetical protein, conserved                              | 57315                                                                            | 53    | 2     | 4.9E-02<br>5.3E-04                       | K.YAVEYVARE<br>R.TTSYGVGQIK.Y                                                     | 1                                     |                   |
| EAN85727.1 | peptidylprolyl isomerase-like, putative                      | 52323                                                                            | 51    | 1     | 1.4E-05                                  | K.VLLQQLQEK.R                                                                     | 1                                     |                   |
| EAN90288.1 | hypothetical protein, conserved                              | 44654                                                                            | 50    | 3     | 6.0E-02<br>6.4E-01<br>3.2E-03            | K.AHVETGIEK.S<br>K.GVAAFDSAWK.H<br>R.ALFLAAYK.H                                   | 0                                     |                   |
| EAN81944.1 | lysosomal/endosomal membrane protein p67, putative           | 73065                                                                            | 50    | 2     | 6.3E-01<br>1.0E-03                       | K.TVSEFLR.V<br>K.NYGPLYEYLGR.R                                                    | 0                                     |                   |
| EAN84604.1 | histone H3, putative                                         | 21714                                                                            | 48    | 1     | 6.1E-05                                  | R.STDLLLQK.A                                                                      | 7                                     |                   |
| EAN90035.1 | proteasome regulatory non-ATPase subunit 5, putative         | 55341                                                                            | 48    | 4     | 9.4E-02<br>1.8E+00<br>1.6E+00<br>4.7E-04 | R.FTSIELIR.E<br>R.NAAIQGITK.L<br>R.MLHNISAAR.A + Oxidation (M)<br>K.INATTIPVLLR.S | 0                                     |                   |
| EAN94547.1 | RuvB-like DNA helicase, putative                             | 52952                                                                            | 48    | 2     | 1.5E-04<br>9.9E-01                       | R.GLGLDDALEAR.M<br>R.MVIVTTKPYSEELSK.I + Oxidation (M)                            | 0                                     |                   |
| EAN87966.1 | glucose-regulated protein 78, putative                       | 71414                                                                            | 45    | 1     | 7.1E-05                                  | R.LSEEEIER.M                                                                      | 0                                     |                   |
| EAN92377.1 | calcium-translocating P-type ATPase, putative                | 110858                                                                           | 45    | 1     | 1.3E-04                                  | R.TGAFTEIGSIER.D                                                                  | 0                                     |                   |
| EAN85669.1 | hypothetical protein, conserved                              | 50997                                                                            | 44    | 1     | 1.2E-04                                  | K.QIENAIAR.R                                                                      | 0                                     |                   |
| EAN86005.1 | chaperonin alpha subunit, putative                           | 59639                                                                            | 43    | 1     | 1.7E-04                                  | R.ALNDALWAVAR.T                                                                   | 1                                     |                   |
| EAN81197.1 | hypothetical protein, conserved                              | 30269                                                                            | 41    | 1     | 2.9E-04                                  | K.LFVNPMTSDGK.F + Oxidation (M)                                                   | 5                                     |                   |
| EAN95506.1 | translation initiation factor, putative                      | 79951                                                                            | 38    | 1     | 4.5E-04                                  | R.VLQAASSTTPK.S                                                                   | 0                                     |                   |

| Band no. | Accession no. | Protein Identity                      | Mr     | SCORE | # PEPT. | E-value | Mascot                           | Additional copies |
|----------|---------------|---------------------------------------|--------|-------|---------|---------|----------------------------------|-------------------|
|          |               |                                       |        |       |         |         | Sequence                         |                   |
| 12 cont. | EAN87391.1    | acid phosphatase, putative            | 52707  | 38    | 2       | 5.9E-02 | K.KLNDFVDTR.Q                    | 1                 |
|          |               |                                       |        |       |         |         | R.NELPVASTLIVER.L                |                   |
|          | EAN86492.1    | squalene monooxygenase, putative      | 64665  | 38    | 1       | 1.7E-04 | K.YGTVFLAK.T                     | 1                 |
|          | EAO00085.1    | alanine aminotransferase, putative    | 55168  | 32    | 1       | 3.1E-03 | R.VVAAEYAVR.G                    | 3                 |
|          | EAN82317.1    | glutamamyl carboxypeptidase, putative | 44248  | 31    | 2       | 9.9E-01 | R.SYVETQLLPAMK.A + Oxidation (M) | 5                 |
|          |               |                                       |        |       |         | 7.0E-03 | K.ANLWATLPGDGGVTK.G              |                   |
|          | EAN80692.1    | farnesyl synthetase, putative         | 32609  | 25    | 1       | 8.3E-03 | R.AVLAGDFLLAR.A                  | 1                 |
|          | EAN95652.1    | hypothetical protein, conserved       | 182938 | 22    | 1       | 1.1E-02 | R.LAEELEQK.A                     | 2                 |
|          | EAN83816.1    | 60S ribosomal protein L5, putative    | 34902  | 21    | 1       | 9.8E-03 | R.DIIAQVVQAK.V                   | 2                 |
|          | EAN83893.1    | hypothetical protein, conserved       | 107055 | 21    | 1       | 2.7E-02 | K.LSSAVNLLR.L                    | 1                 |
|          | EAN81577.1    | trichohyalin, putative                | 54815  | 21    | 1       | 1.4E-02 | R.QLEQELK.A                      | 1                 |
|          | EAN89707.1    | hypothetical protein, conserved       | 57431  | 19    | 1       | 1.8E-02 | R.IALFDAFR.H                     | 0                 |
|          | EAO00028.1    | citrate synthase, putative            | 53081  | 19    | 1       | 2.5E-02 | R.TPYLAAAIYNR.L                  | 1                 |

**TABLE S4 (BAND 13): COMPLETE PEPTIDE LIST**

| Band no. | Accession no. | Protein Identity                      | Mr     | SCORE | # PEPT. | E-value | Mascot Sequence                  | Additional gene copies under same match |
|----------|---------------|---------------------------------------|--------|-------|---------|---------|----------------------------------|-----------------------------------------|
| Band 13  | EAN99374.1    | pyruvate phosphate dikinase, putative | 101851 | 2013  | 64      | 8.2E-03 | K.LQSPDLK.G                      | 0                                       |
|          |               |                                       |        |       |         | 2.1E-03 | R.VAIDMVR.E                      |                                         |
|          |               |                                       |        |       |         | 9.6E-04 | K.QFTLSGR.V                      |                                         |
|          |               |                                       |        |       |         | 9.6E-03 | R.VAIDMVR.E + Oxidation (M)      |                                         |
|          |               |                                       |        |       |         | 1.6E-02 | K.EELTFTK.Q                      |                                         |
|          |               |                                       |        |       |         | 2.0E-03 | R.DDAGSFLR.H                     |                                         |
|          |               |                                       |        |       |         | 1.1E-04 | R.SATGVAFSR.S                    |                                         |
|          |               |                                       |        |       |         | 4.8E-03 | K.FDSDLTAK.D                     |                                         |
|          |               |                                       |        |       |         | 1.8E-04 | K.ATAEAWIR.R                     |                                         |
|          |               |                                       |        |       |         | 1.9E-03 | R.GDFLGIFR.T                     |                                         |
|          |               |                                       |        |       |         | 5.1E-02 | R.FVYDSYR.R                      |                                         |
|          |               |                                       |        |       |         | 8.5E-04 | K.GLIYAGQLK.L                    |                                         |
|          |               |                                       |        |       |         | 1.4E-02 | R.DMKELLGGK.G                    |                                         |
|          |               |                                       |        |       |         | 7.2E-04 | K.GKQFTLSGR.V                    |                                         |
|          |               |                                       |        |       |         | 1.8E-01 | K.KEELTFTK.Q                     |                                         |
|          |               |                                       |        |       |         | 1.3E-01 | R.DMKELLGGK.G + Oxidation (M)    |                                         |
|          |               |                                       |        |       |         | 7.6E-04 | R.ANADTPNDAAK.A                  |                                         |
|          |               |                                       |        |       |         | 1.1E+00 | R.FVYDSYRR.F                     |                                         |
|          |               |                                       |        |       |         | 5.0E-01 | K.FVYYFGGQK.A                    |                                         |
|          |               |                                       |        |       |         | 3.2E-08 | R.GGMTSHAAVVAR.G                 |                                         |
|          |               |                                       |        |       |         | 1.4E-05 | R.SFGAEGVGLCR.T                  |                                         |
|          |               |                                       |        |       |         | 3.0E-06 | R.GGMTSHAAVVAR.G + Oxidation (M) |                                         |
|          |               |                                       |        |       |         | 1.3E-04 | R.GTKFDSDLTAK.D                  |                                         |
|          |               |                                       |        |       |         | 2.1E-01 | R.EGDYITLDGSK.G                  |                                         |
|          |               |                                       |        |       |         | 1.3E-07 | K.TAEETLAAAGQR.V                 |                                         |
|          |               |                                       |        |       |         | 3.8E-04 | K.GLPQEVVEQVK.A                  |                                         |
|          |               |                                       |        |       |         | 1.5E-03 | K.KFVYYFGGQK.A                   |                                         |
|          |               |                                       |        |       |         | 2.0E-03 | R.TEHMFFEGSR.I                   |                                         |
|          |               |                                       |        |       |         | 2.2E-05 | R.EMILADTLEGR.K                  |                                         |
|          |               |                                       |        |       |         | 6.3E-05 | R.EMILADTLEGR.K + Oxidation (M)  |                                         |
|          |               |                                       |        |       |         | 2.0E-03 | K.VIPEIMPLVGK.K                  |                                         |
|          |               |                                       |        |       |         | 5.9E-08 | R.VPVATVAAHAALK.E                |                                         |
|          |               |                                       |        |       |         | 3.8E-05 | K.VIPEIMPLVGK.K + Oxidation (M)  |                                         |
|          |               |                                       |        |       |         | 5.6E-05 | R.TPQQIGQSLSLR.W                 |                                         |
|          |               |                                       |        |       |         | 2.0E-05 | R.EGLITKEEAVLR.I                 |                                         |

| Band no.   | Accession no.                                 | Protein Identity | Mr     | SCORE | # PEPT. | E-value | Mascot<br>Sequence                         | Additional gene copies |
|------------|-----------------------------------------------|------------------|--------|-------|---------|---------|--------------------------------------------|------------------------|
|            | EAN99374.1                                    | cont.            |        |       |         | 3.1E-06 | R.EMILADTLEGRK.A                           |                        |
|            |                                               |                  |        |       |         | 1.8E-03 | R.EMILADTLEGRK.A + Oxidation (M)           |                        |
|            |                                               |                  |        |       |         | 1.9E-02 | K.SLHEMNPMLGHR.G                           |                        |
|            |                                               |                  |        |       |         | 1.5E-02 | K.VIPEIMIPLVGKK.E                          |                        |
|            |                                               |                  |        |       |         | 2.6E-02 | K.SLHEMNPMLGHR.G + 2 Oxidation (M)         |                        |
|            |                                               |                  |        |       |         | 2.6E-05 | K.TKGLPQEVVEQVK.A                          |                        |
|            |                                               |                  |        |       |         | 1.6E-05 | R.VDYIVGTMIEVPR.A                          |                        |
|            |                                               |                  |        |       |         | 4.4E-05 | R.VDYIVGTMIEVPR.A + Oxidation (M)          |                        |
|            |                                               |                  |        |       |         | 1.2E-03 | K.ELTEEYLVLFQR.K                           |                        |
|            |                                               |                  |        |       |         | 1.2E-08 | R.DMQDIEFTVQDGR.L                          |                        |
|            |                                               |                  |        |       |         | 2.2E-09 | R.LETSPEDLAGMDAAR.G                        |                        |
|            |                                               |                  |        |       |         | 1.1E-06 | R.LETSPEDLAGMDAAR.G + Oxidation (M)        |                        |
|            |                                               |                  |        |       |         | 7.1E-02 | R.VFREGDYITLDGSK.G                         |                        |
|            |                                               |                  |        |       |         | 1.8E-04 | R.FITMYADIVMQVGR.E + Oxidation (M)         |                        |
|            |                                               |                  |        |       |         | 8.6E-06 | R.YPSMEETMPENYR.L + 2 Oxidation (M)        |                        |
|            |                                               |                  |        |       |         | 2.1E-07 | K.DPFESIDQEGVGELMR.I                       |                        |
|            |                                               |                  |        |       |         | 7.4E-03 | R.IDAIREMILADTLEGR.K + Oxidation (M)       |                        |
|            |                                               |                  |        |       |         | 2.6E-03 | R.HRYPSMEETMPENYR.L                        |                        |
|            |                                               |                  |        |       |         | 1.5E-08 | K.GLAASPGAAVGQIVFDADSAK.E                  |                        |
|            |                                               |                  |        |       |         | 2.2E-04 | R.HRYPSMEETMPENYR.L + Oxidation (M)        |                        |
|            |                                               |                  |        |       |         | 6.3E-04 | R.HRYPSMEETMPENYR.L + 2 Oxidation (M)      |                        |
|            |                                               |                  |        |       |         | 1.1E-05 | R.SGAAASMPGMMDTVNLGMNK.A + 3 Oxidation (M) |                        |
|            |                                               |                  |        |       |         |         | R.SGAAASMPGMMDTVNLGMNK.A + 4 Oxidation (M) |                        |
|            |                                               |                  |        |       |         | 4.6E-06 | (M)                                        |                        |
|            |                                               |                  |        |       |         | 2.1E-03 | R.IDPLQVDHLMHPNIEPGAAS.S                   |                        |
|            |                                               |                  |        |       |         | 2.2E-02 | R.IDPLQVDHLMHPNIEPGAAS.S + Oxidation (M)   |                        |
|            |                                               |                  |        |       |         | 8.4E-03 | R.LLDPPLHEFVPHEAQAELAK.K                   |                        |
|            |                                               |                  |        |       |         | 6.7E-06 | R.RVEADMGTNFGDVENPLLFSVR.S                 |                        |
|            |                                               |                  |        |       |         |         | R.RVEADMGTNFGDVENPLLFSVR.S + Oxidation (M) |                        |
|            |                                               |                  |        |       |         | 2.5E-05 | (M)                                        |                        |
|            |                                               |                  |        |       |         | 1.2E-03 | K.GLAASPGAAVGQIVFDADSAKEWSAR.G             |                        |
| EAN98352.1 | pyruvate phosphate dikinase, putative         |                  | 101833 | 2011  | 59      | 1.6E-03 | K.VVPEIMIPLVGK.K                           | 0                      |
|            |                                               |                  |        |       |         | 1.6E-05 | K.VVPEIMIPLVGK.K + Oxidation               |                        |
|            |                                               |                  |        |       |         | 6.1E-08 | K.DPFESIDQEGVGELVR.I                       |                        |
| EAN92377.1 | calcium-translocating P-type ATPase, putative |                  | 110858 | 611   | 21      | 1.1E+00 | R.AIFNNTK.Q                                | 0                      |
|            |                                               |                  |        |       |         | 8.5E-02 | K.LNSLFVK.G                                |                        |
|            |                                               |                  |        |       |         | 1.5E-03 | R.AESAIEALK.S                              |                        |

| Band no.   | Accession no.                    | Protein Identity | Mr    | SCORE | # PEPT. | Mascot     |                                      | Additional gene copies |
|------------|----------------------------------|------------------|-------|-------|---------|------------|--------------------------------------|------------------------|
|            |                                  |                  |       |       |         | E-value    | Sequence                             |                        |
| EAN92377.1 | cont.                            |                  |       |       |         | 1.6E-02    | K.NTTLEFTR.Q                         |                        |
|            |                                  |                  |       |       |         | 1.8E-01    | K.GAPEEVLRR.S                        |                        |
|            |                                  |                  |       |       |         | 6.5E-04    | R.DLPSVETLGR.C                       |                        |
|            |                                  |                  |       |       |         | 9.8E-07    | K.AVMSAVLFSR.T + Oxidation (M)       |                        |
|            |                                  |                  |       |       |         | 2.1E-04    | R.GLSADEVEER.R                       |                        |
|            |                                  |                  |       |       |         | 3.8E-04    | K.LDEFGMLLSK.V                       |                        |
|            |                                  |                  |       |       |         | 1.2E-03    | K.LDEFGMLLSK.V + Oxidation (M)       |                        |
|            |                                  |                  |       |       |         | 3.8E-04    | R.TGAFTEIGSIER.D                     |                        |
|            |                                  |                  |       |       |         | 3.5E-06    | K.IDAMSGSEHALR.C + Oxidation (M)     |                        |
|            |                                  |                  |       |       |         | 2.9E-02    | K.MVLADDNFATVVK.A                    |                        |
|            |                                  |                  |       |       |         | 2.2E-04    | K.ADIGIAMGSGTQVAK.A + Oxidation (M)  |                        |
|            |                                  |                  |       |       |         | 3.1E-07    | K.MVLADDNFATVVK.A + Oxidation (M)    |                        |
|            |                                  |                  |       |       |         | 9.8E-03    | R.EQEEVKTPLQIK.L                     |                        |
|            |                                  |                  |       |       |         | 5.4E-03    | K.KADIGIAMGSGTQVAK.A                 |                        |
|            |                                  |                  |       |       |         | 1.2E-07    | K.IGEATEAALLVMSEK.L                  |                        |
|            |                                  |                  |       |       |         | 3.9E-03    | K.KADIGIAMGSGTQVAK.A + Oxidation (M) |                        |
|            |                                  |                  |       |       |         | 6.9E-08    | K.IGEATEAALLVMSEK.L + Oxidation      |                        |
|            |                                  |                  |       |       |         | EAN87190.1 | elongation factor 2, putative        |                        |
| 1.6E-02    | K.YSVSPVVR.V                     |                  |       |       |         |            |                                      |                        |
| 1.7E-02    | R.GGGQIIPTAR.R                   |                  |       |       |         |            |                                      |                        |
| 8.6E-04    | K.VSEPVSFR.E                     |                  |       |       |         |            |                                      |                        |
| 6.4E-05    | R.GPNVVVDVTK.G                   |                  |       |       |         |            |                                      |                        |
| 6.7E-04    | M.VNFTVDEV.R.A                   |                  |       |       |         |            |                                      |                        |
| 1.0E-02    | R.IRPVVFINK.V                    |                  |       |       |         |            |                                      |                        |
| 3.6E-03    | R.IMGNNYVFGK.K + Oxidation (M)   |                  |       |       |         |            |                                      |                        |
| 2.7E-05    | K.SQANTLTLSVR.Q                  |                  |       |       |         |            |                                      |                        |
| 7.9E-02    | R.ALMDYPEQIR.N                   |                  |       |       |         |            |                                      |                        |
| 9.6E-03    | R.ALMDYPEQIR.N + Oxidation (M)   |                  |       |       |         |            |                                      |                        |
| 1.0E-01    | R.NMSVIAHVDHGK.S                 |                  |       |       |         |            |                                      |                        |
| 4.3E-02    | R.NMSVIAHVDHGK.S + Oxidation (M) |                  |       |       |         |            |                                      |                        |
| 7.2E-07    | K.STLSDSLVGAAGIHK.M              |                  |       |       |         |            |                                      |                        |
| 2.3E-04    | K.KQDLYEDKPVQR.T                 |                  |       |       |         |            |                                      |                        |
| 3.1E-07    | K.SATITDDGESPHPLR.D              |                  |       |       |         |            |                                      |                        |
| 6.3E-02    | R.FLADKFDWDVAEAR.K               |                  |       |       |         |            |                                      |                        |
| 2.9E-04    | R.GVIIGEENRPGTPIYNVR.A           |                  |       |       |         |            |                                      |                        |
| EAN94839.1 | beta tubulin, putative           |                  | 50520 | 519   | 20      | 2.8E-03    | K.NMMQAADPR.H                        | 0                      |
|            |                                  |                  |       |       |         | 4.2E-01    | R.YLTASALFR.G                        |                        |
|            |                                  |                  |       |       |         | 3.2E-03    | K.NMMQAADPR.H + Oxidation (M)        |                        |
|            |                                  |                  |       |       |         | 7.3E-03    | K.NMMQAADPR.H + 2 Oxidation (M)      |                        |
|            |                                  |                  |       |       |         | 7.6E-03    | K.LREEYPDR.I                         |                        |
|            |                                  |                  |       |       |         | 3.7E-05    | K.LAVNLVPFPR.L                       |                        |

| Band no.   | Accession no. | Protein Identity                        | Mr    | SCORE | # PEPT. | E-value | Mascot<br>Sequence                  | Additional gene copies |
|------------|---------------|-----------------------------------------|-------|-------|---------|---------|-------------------------------------|------------------------|
| EAN94839.1 | cont.         |                                         |       |       |         | 8.0E-06 | R.VGEQFTAMFR.R                      |                        |
|            |               |                                         |       |       |         | 1.9E-06 | R.VGEQFTAMFR.R + Oxidation (M)      |                        |
|            |               |                                         |       |       |         | 9.2E-06 | R.KLAVNLVPFPR.L                     |                        |
|            |               |                                         |       |       |         | 3.8E-01 | R.FPGQLNSDLRK.L                     |                        |
|            |               |                                         |       |       |         | 9.5E-08 | R.INVYFDEATGGR.Y                    |                        |
|            |               |                                         |       |       |         | 1.7E-05 | R.IMMTFSIIPSPK.V + Oxidation (M)    |                        |
|            |               |                                         |       |       |         | 7.1E-04 | R.IMMTFSIIPSPK.V + 2 Oxidation (M)  |                        |
|            |               |                                         |       |       |         | 8.9E-04 | K.EVDEQMLNVQNK.N                    |                        |
|            |               |                                         |       |       |         | 1.3E-05 | K.EVDEQMLNVQNK.N + Oxidation (M)    |                        |
|            |               |                                         |       |       |         | 7.6E-05 | R.AVLIDLEPGTMDSVR.A                 |                        |
|            |               |                                         |       |       |         | 1.3E-03 | R.AVLIDLEPGTMDSVR.A + Oxidation (M) |                        |
|            |               |                                         |       |       |         | 4.4E-05 | R.GLSVPELTQQMFDAK.N                 |                        |
|            |               |                                         |       |       |         | 1.6E-04 | R.GLSVPELTQQMFDAK.N + Oxidation (M) |                        |
|            |               |                                         |       |       |         | 6.6E-03 | R.LHFFMMGFAPLTSR.G + 2 Oxidation    |                        |
| EAN82002.1 | putative      | cytoskeleton-associated protein CAP5.5, | 82008 | 506   | 13      | 1.0E-01 | K.LDIQFTK.L                         | 0                      |
|            |               |                                         |       |       |         | 6.3E-02 | R.DFTGAPSYR.F                       |                        |
|            |               |                                         |       |       |         | 1.6E-03 | K.GYGGVNELLGK.L                     |                        |
|            |               |                                         |       |       |         | 6.9E-02 | R.HSPLMISVSR.A                      |                        |
|            |               |                                         |       |       |         | 4.4E-04 | R.ATVPEEVLER.L                      |                        |
|            |               |                                         |       |       |         | 1.2E-03 | R.FDEAWVNATK.G                      |                        |
|            |               |                                         |       |       |         | 5.5E-07 | K.LSATNPALHNR.V                     |                        |
|            |               |                                         |       |       |         | 3.6E-04 | K.MPGEAAVTSAGSK.L + Oxidation (M)   |                        |
|            |               |                                         |       |       |         | 3.0E-03 | R.QFQNFGITMLK.I + Oxidation (M)     |                        |
|            |               |                                         |       |       |         | 4.2E-07 | R.SDVFAQALSEEYR.Q                   |                        |
|            |               |                                         |       |       |         | 1.4E-03 | K.FSPDSSVIPLGSSIK.K                 |                        |
|            |               |                                         |       |       |         | 4.9E-08 | R.YLEAGNIVLLNTPAGK.S                |                        |
|            |               |                                         |       |       |         | 2.1E-04 | R.VIELADGSVDEEGILSK.C               |                        |
| EAN96800.1 | putative      | lipophosphoglycan biosynthetic protein, | 86969 | 491   | 13      | 1.0E-01 | R.LKEGLEK.E                         | 0                      |
|            |               |                                         |       |       |         | 1.7E-02 | R.VLELNHR.H                         |                        |
|            |               |                                         |       |       |         | 8.6E-03 | K.FWAQFGK.H                         |                        |
|            |               |                                         |       |       |         | 1.8E-02 | R.MLYLTAPK.E + Oxidation (M)        |                        |
|            |               |                                         |       |       |         | 1.4E-04 | R.LGILEDANNR.G                      |                        |
|            |               |                                         |       |       |         | 1.5E-02 | R.RIFITDEFR.Q                       |                        |
|            |               |                                         |       |       |         | 2.2E-03 | K.HIYFLTGDSVK.K                     |                        |
|            |               |                                         |       |       |         | 3.5E-05 | R.KPSEVTEEEYHK.F                    |                        |
|            |               |                                         |       |       |         | 1.4E-06 | R.GIVDSNDLPLNVSRE                   |                        |
|            |               |                                         |       |       |         | 4.5E-06 | K.MLDILINSLYTNR.A + Oxidation (M)   |                        |
|            |               |                                         |       |       |         | 3.0E-08 | K.AELEEHLGSLGTSGTK.R                |                        |
|            |               |                                         |       |       |         | 2.8E-03 | K.AELEEHLGSLGTSGTKR.F               |                        |

| Band no. | Accession no. | Protein Identity                                    | Mr     | SCORE | # PEPT. | E-value | Mascot                                   | Additional gene copies |
|----------|---------------|-----------------------------------------------------|--------|-------|---------|---------|------------------------------------------|------------------------|
|          |               |                                                     |        |       |         |         | Sequence                                 |                        |
|          | EAN96800.1    | cont.                                               |        |       |         | 1.7E-03 | R.MVNVMNQQAISLHTMR.Y + 3 Oxidation       |                        |
|          | EAN92788.1    | cytoskeleton-associated protein CAP5.5,<br>putative | 89960  | 436   | 11      | 1.1E-04 | K.NSSGDPEPSDAFTFVVAR.E                   | 0                      |
|          | EAN95481.1    | retrotransposon hot spot (RHS) protein,<br>putative | 108368 | 398   | 11      | 4.1E-02 | K.ELQGGVTR.I                             | 0                      |
|          |               |                                                     |        |       |         | 3.2E-03 | R.VLIGTPGIGK.S                           |                        |
|          |               |                                                     |        |       |         | 5.9E-03 | K.SVLGGLWQR.G                            |                        |
|          |               |                                                     |        |       |         | 2.2E-02 | K.GYIYDVAK.K                             |                        |
|          |               |                                                     |        |       |         | 2.0E-03 | K.DILLEGSTLR.T                           |                        |
|          |               |                                                     |        |       |         | 1.7E-03 | R.NGNVIMEAFVR.R                          |                        |
|          |               |                                                     |        |       |         | 3.4E-06 | R.SNLGEEWVVER.N                          |                        |
|          |               |                                                     |        |       |         | 3.0E-05 | R.VWQIVLDDLTK.W                          |                        |
|          |               |                                                     |        |       |         | 1.1E-08 | R.TLLGWSTATAEIR.A                        |                        |
|          |               |                                                     |        |       |         | 7.9E-04 | R.IPMEYGVLYIPK.V                         |                        |
|          |               |                                                     |        |       |         | 1.8E-03 | R.IPMEYGVLYIPK.V + Oxidation             |                        |
|          | EAN82857.1    | elongation factor 1-alpha (EF-1-alpha),<br>putative | 48884  | 374   | 12      | 4.7E-03 | K.VGYNVEK.V                              | 4                      |
|          |               |                                                     |        |       |         | 4.5E-04 | K.FAEIESK.I                              |                        |
|          |               |                                                     |        |       |         | 1.5E-02 | K.YAWVLDK.L                              |                        |
|          |               |                                                     |        |       |         | 7.3E-02 | R.TIEKFEK.E                              |                        |
|          |               |                                                     |        |       |         | 1.8E-03 | R.QTVAVGIK.A                             |                        |
|          |               |                                                     |        |       |         | 1.3E-03 | K.SVNFAQER.Y                             |                        |
|          |               |                                                     |        |       |         | 4.9E-05 | K.IGGIGTVPVGR.V                          |                        |
|          |               |                                                     |        |       |         | 5.0E-01 | K.SENMPWYK.G + Oxidation (M)             |                        |
|          |               |                                                     |        |       |         | 7.7E-03 | K.STATGHLYK.C                            |                        |
|          |               |                                                     |        |       |         | 9.0E-04 | R.GITIDIALWK.F                           |                        |
|          |               |                                                     |        |       |         | 1.3E-05 | R.FIPISGWQGDNMIDK.S + Oxidation (M)      |                        |
|          |               |                                                     |        |       |         | 1.4E-03 | R.VETGTMKPGDVVTFAPANVTTEVK.S + Oxidation |                        |
|          | EAN81053.1    | alpha tubulin, putative                             | 50549  | 349   | 9       | 8.6E-03 | R.LSVDYGKK.S                             | 0                      |
|          |               |                                                     |        |       |         | 8.3E-06 | K.DVNAAVATIK.T                           |                        |
|          |               |                                                     |        |       |         | 9.3E-04 | K.EDAANNYAR.G                            |                        |
|          |               |                                                     |        |       |         | 2.7E-02 | R.IDHKFDLMYSK.R + Oxidation (M)          |                        |
|          |               |                                                     |        |       |         | 7.9E-07 | R.AVFLDLEPTVVDEIR.T                      |                        |
|          |               |                                                     |        |       |         | 3.1E-04 | R.NLDIERPTYTNLNR.L                       |                        |
|          |               |                                                     |        |       |         | 1.1E-05 | R.IHFVLTSYAPVISA EK.A                    |                        |
|          |               |                                                     |        |       |         | 4.1E-01 | R.RNLDIERPTYTNLNR.L                      |                        |
|          |               |                                                     |        |       |         |         | K.AYHEQLSVSEISNAVFEPA SMMTK.C + 2        |                        |
|          |               |                                                     |        |       |         | 1.1E-05 | Oxidation (M)                            |                        |

| Band no.   | Accession no.                                                  | Protein Identity | Mr  | SCORE | # PEPT. | E-value     | Mascot   | Additional gene copies                           |
|------------|----------------------------------------------------------------|------------------|-----|-------|---------|-------------|----------|--------------------------------------------------|
|            |                                                                |                  |     |       |         |             | Sequence |                                                  |
| EAN91609.1 | vacuolar-type proton translocating pyrophosphatase 1, putative | 86135            | 344 | 11    | 1.3E+00 | K.AFQTAFR.G | 1        |                                                  |
|            |                                                                |                  |     |       |         | 4.8E-02     |          | R.NVYVISR.R                                      |
|            |                                                                |                  |     |       |         | 2.0E-01     |          | R.NIPEDDAR.N                                     |
|            |                                                                |                  |     |       |         | 1.4E-03     |          | R.NAYLTDEVMR.N                                   |
|            |                                                                |                  |     |       |         | 3.8E-04     |          | R.NAYLTDEVMR.N + Oxidation (M)                   |
|            |                                                                |                  |     |       |         | 7.4E-03     |          | K.AADVGADLVGKVER.N                               |
|            |                                                                |                  |     |       |         | 9.6E-05     |          | K.SVGLAAMDVMNEIR.R + 2 Oxidation (M)             |
|            |                                                                |                  |     |       |         | 1.6E-09     |          | R.EITDALDAAGNTTAAIGK.G                           |
|            |                                                                |                  |     |       |         | 1.1E-01     |          | K.GSPQHAAAVIGDVTGDPLK.D                          |
|            |                                                                |                  |     |       |         | 3.0E-10     |          | R.TAVMATEGSEEGDQSLGFAK.A                         |
|            |                                                                |                  |     |       |         | 9.8E-10     |          | R.TAVMATEGSEEGDQSLGFAK.A + Oxidation             |
| EAN84826.1 | retrotransposon hot spot (RHS) protein, putative               | 104023           | 342 | 13    | 2.1E+00 | K.DILLEGR.T | 0        |                                                  |
|            |                                                                |                  |     |       |         | 8.5E-03     |          | R.ASAVPQGDR.Q                                    |
|            |                                                                |                  |     |       |         | 9.7E-03     |          | K.IVAFWDGK.V                                     |
|            |                                                                |                  |     |       |         | 1.9E-02     |          | R.DFFSDPTR.Y                                     |
|            |                                                                |                  |     |       |         | 3.8E-01     |          | R.ILTTSAAMK.M                                    |
|            |                                                                |                  |     |       |         | 2.2E-02     |          | <i>K.GYIIDVAK.K not unique</i>                   |
|            |                                                                |                  |     |       |         | 2.4E-01     |          | K.LNHQGYPTR.T                                    |
|            |                                                                |                  |     |       |         | 5.1E-01     |          | K.DILLLILGSR.G                                   |
|            |                                                                |                  |     |       |         | 2.2E-02     |          | K.LTNYDEWEK.Q                                    |
|            |                                                                |                  |     |       |         | 4.0E-05     |          | K.NSLDTAFEVAR.I                                  |
|            |                                                                |                  |     |       |         | 5.1E-04     |          | R.HIFDEDKYIIR.L                                  |
|            |                                                                |                  |     |       |         | 2.4E-07     |          | K.LNDFLTLEMEGR.G + Oxidation (M)                 |
|            |                                                                |                  |     |       |         | 1.4E-04     |          | R.ARPESEDVTDQPAATQIR.V                           |
|            |                                                                |                  |     |       |         | EAN81408.1  |          | retrotransposon hot spot (RHS) protein, putative |
| 7.9E-02    | R.STVEDILLK.G                                                  |                  |     |       |         |             |          |                                                  |
| 1.0E+00    | R.LGAVNAALVAIK.D                                               |                  |     |       |         |             |          |                                                  |
| 4.1E-05    | K.NSLDAAFEVAR.I                                                |                  |     |       |         |             |          |                                                  |
| 4.6E-03    | R.SEFEGDTDQPAATHIR.V                                           |                  |     |       |         |             |          |                                                  |
|            |                                                                |                  |     |       |         |             |          |                                                  |
| EAN82412.1 | retrotransposon hot spot (RHS) protein, putative               | 109652           | 311 | 10    | 1.4E-01 | R.VWQFVK.G  | 0        |                                                  |
|            |                                                                |                  |     |       |         | 4.9E-03     |          | K.AGVHDITK.Q                                     |
|            |                                                                |                  |     |       |         | 4.6E-02     |          | R.LMVLTSBK.G + Oxidation (M)                     |
|            |                                                                |                  |     |       |         | 3.2E-03     |          | <i>R.VLIGTPGIGK.S not unique</i>                 |
|            |                                                                |                  |     |       |         | 9.3E-06     |          | K.LNDFLTLR.F                                     |
|            |                                                                |                  |     |       |         | 2.5E-01     |          | R.MEDLGPLLR.Y + Oxidation (M)                    |
|            |                                                                |                  |     |       |         | 4.5E-01     |          | R.NDTLTPLASGK.L                                  |
|            |                                                                |                  |     |       |         | 1.2E-04     |          | K.QTLDAALEEVR.N                                  |



| Band no.   | Accession no.                                    | Protein Identity | Mr  | SCORE | # PEPT. | Mascot                                  |                   | Additional gene copies |
|------------|--------------------------------------------------|------------------|-----|-------|---------|-----------------------------------------|-------------------|------------------------|
|            |                                                  |                  |     |       |         | E-value                                 | Sequence          |                        |
| EAN82412.1 | cont.                                            |                  |     |       |         | 4.6E-05                                 | R.YIGDEGVLNEIK.T  |                        |
|            |                                                  |                  |     |       |         | 1.5E-05                                 | R.IINLPAYQALEER.K |                        |
| EAN94997.1 | retrotransposon hot spot (RHS) protein, putative | 126164           | 288 | 8     | 4.3E-03 | R.LLIGTPGIGK.S                          |                   | 0                      |
|            |                                                  |                  |     |       | 3.9E-04 | K.IVLGDLWQR.G                           |                   |                        |
|            |                                                  |                  |     |       | 1.2E-04 | <i>K.QLDAALEEVN not unique</i>          |                   |                        |
|            |                                                  |                  |     |       | 1.7E-05 | R.SNLGDEWVVER.N                         |                   |                        |
|            |                                                  |                  |     |       | 3.0E-05 | <i>R.VWQIVLDDLTK.W not unique</i>       |                   |                        |
|            |                                                  |                  |     |       | 5.7E-02 | K.LEGLYESVYNAR.W                        |                   |                        |
|            |                                                  |                  |     |       | 9.9E-01 | K.LNDFLTMELDGR.G                        |                   |                        |
|            |                                                  |                  |     |       | 4.2E-06 | K.LNDFLTMELDGR.G + Oxidation (M)        |                   |                        |
| EAN83522.1 | retrotransposon hot spot (RHS) protein, putative | 76947            | 252 | 8     | 6.7E-09 | R.LGAVDVALLAIK.D                        |                   | 0                      |
| EAN97655.1 | chaperonin HSP60, mitochondrial precursor        | 59991            | 198 | 4     | 1.5E-04 | R.AVSAVATTLGPK.G                        |                   | 1                      |
|            |                                                  |                  |     |       | 2.6E-06 | K.VGGGSEVEVNEK.K                        |                   |                        |
|            |                                                  |                  |     |       | 3.9E-07 | R.AVGVILQSVAEQSR.K                      |                   |                        |
|            |                                                  |                  |     |       | 2.4E-04 | R.AAVQEGIVPGGGVALLR.A                   |                   |                        |
| EAN84956.1 | retrotransposon hot spot (RHS) protein, putative | 115032           | 197 | 8     | 2.3E-02 | K.ILEAITK.L                             |                   | 0                      |
|            |                                                  |                  |     |       | 8.4E-01 | K.EFFKDPTK.Y                            |                   |                        |
|            |                                                  |                  |     |       | 1.0E-02 | K.GYIIYDVAR.K                           |                   |                        |
| EAN97710.1 | retrotransposon hot spot (RHS) protein, putative | 108700           | 192 | 6     | 4.3E-03 | R.VQTSTSVVK.S                           |                   | 0                      |
|            |                                                  |                  |     |       | 2.3E-02 | R.MEEVGPIR.Y + Oxidation (M) not unique |                   |                        |
|            |                                                  |                  |     |       | 3.3E-03 | K.GVVSLEQWR.N                           |                   |                        |
|            |                                                  |                  |     |       | 1.4E-05 | R.LLLIGTPGIGK.S                         |                   |                        |
|            |                                                  |                  |     |       | 1.7E-01 | R.NYEGKDTVSPK.G                         |                   |                        |
|            |                                                  |                  |     |       | 4.3E-06 | K.LNDFLLEMEGK.G                         |                   |                        |
| EAN95887.1 | heat shock protein 70 (HSP70), putative          | 73607            | 189 | 6     | 9.2E-03 | R.GTLQPVER.V                            |                   | 0                      |
|            |                                                  |                  |     |       | 9.4E-02 | K.NTVNEPNVAGK.I                         |                   |                        |
|            |                                                  |                  |     |       | 1.1E-03 | K.DAGTIAGMEVLR.I                        |                   |                        |
|            |                                                  |                  |     |       | 5.2E-02 | R.AVHDVVLVGGSTR.I                       |                   |                        |
|            |                                                  |                  |     |       | 3.8E-04 | K.VMQLVSDFFGGK.E + Oxidation (M)        |                   |                        |
|            |                                                  |                  |     |       | 2.2E-06 | R.TTPSYVAFTDTER.L                       |                   |                        |
| EAN87824.1 | hypothetical protein, conserved                  | 29236            | 171 | 3     | 2.4E-06 | R.FVFTAVLPR.F                           |                   | 1                      |
|            |                                                  |                  |     |       | 3.0E-06 | K.IINLSAEEIR.A                          |                   |                        |
|            |                                                  |                  |     |       | 1.4E-05 | K.SEEPSGLELVDLR.D                       |                   |                        |
| EAN85054.1 | retrotransposon hot spot (RHS) protein, putative | 139992           | 168 | 5     | 9.7E-02 | R.VLTQLLR.E                             |                   | 0                      |

| Band no.   | Accession no.                                                                 | Protein Identity | Mr  | SCORE | # PEPT. | Mascot                     |          | Additional gene copies |
|------------|-------------------------------------------------------------------------------|------------------|-----|-------|---------|----------------------------|----------|------------------------|
|            |                                                                               |                  |     |       |         | E-value                    | Sequence |                        |
| EAN83533.1 | histone H2B, putative                                                         | 12353            | 161 | 4     | 3.8E-02 | R.ELQTAVR.L                | 1        |                        |
|            |                                                                               |                  |     |       | 9.5E-03 | R.LVLPADLAK.H              |          |                        |
|            |                                                                               |                  |     |       | 2.1E-06 | R.IASEAATVVR.V             |          |                        |
|            |                                                                               |                  |     |       | 1.2E-06 | K.IVNSFVNDLFR.I            |          |                        |
| EAN81877.1 | ATP-dependent Clp protease subunit, heat shock protein 100 (HSP100), putative | 67834            | 157 | 4     | 7.8E-02 | K.YRGEFEER.L               | 0        |                        |
|            |                                                                               |                  |     |       | 9.5E-03 | R.GDVPDTLSSSR.I            |          |                        |
|            |                                                                               |                  |     |       | 8.8E-06 | K.VTEVEVAAVVAR.W           |          |                        |
|            |                                                                               |                  |     |       | 8.9E-07 | K.TSIVEGIAQQIVR.G          |          |                        |
| EAN81660.1 | retrotransposon hot spot (RHS) protein, putative                              | 62254            | 149 | 5     | 2.3E-02 | R.VLTQVLR.E                | 0        |                        |
|            |                                                                               |                  |     |       | 3.4E-01 | R.VLTQVLRER.R              |          |                        |
| EAN82470.1 | retrotransposon hot spot (RHS) protein, putative                              | 114542           | 142 | 6     | 3.3E-03 | K.WSEAAAQVKA               | 1        |                        |
|            |                                                                               |                  |     |       | 2.9E-04 | K.LNAVLTQVLTEEK.R          |          |                        |
| EAN80947.1 | tryparedoxin peroxidase, putative                                             | 22886            | 136 | 4     | 6.2E-03 | K.AFQFVEK.H                | 3        |                        |
|            |                                                                               |                  |     |       | 1.1E-03 | R.GLFIDPK.Q                |          |                        |
|            |                                                                               |                  |     |       | 4.4E-04 | R.QITVNDLPVGR.D            |          |                        |
|            |                                                                               |                  |     |       | 6.1E-04 | K.SYGVKKEEDGVAYR.G         |          |                        |
| EAN94699.1 | hypothetical protein, conserved                                               | 87437            | 133 | 4     | 2.2E-02 | R.IVYPDGSR.Y               | 1        |                        |
|            |                                                                               |                  |     |       | 7.1E-05 | K.DAPVGAGVFLHR.L           |          |                        |
|            |                                                                               |                  |     |       | 1.7E-01 | K.AVNFPVQRWIK.S            |          |                        |
|            |                                                                               |                  |     |       | 3.6E-06 | R.FINDVDDDEELER.M          |          |                        |
| EAN81423.1 | calcium-translocating P-type ATPase, putative                                 | 19723            | 132 | 3     | 4.7E-06 | K.LVLAQFEDTLVR.I           | 0        |                        |
| EAN99306.1 | retrotransposon hot spot (RHS) protein, putative                              | 109235           | 127 | 5     | 4.8E-01 | R.AQISTSVVK.S              | 0        |                        |
|            |                                                                               |                  |     |       | 1.6E-04 | R.GGVLSLEQWR.D             |          |                        |
|            |                                                                               |                  |     |       | 1.2E-04 | R.NDSVQQSGEAR.L            |          |                        |
| EAN95492.1 | vacuolar-type Ca <sup>2+</sup> -ATPase, putative                              | 123386           | 122 | 3     | 3.6E-04 | R.LDELAGLIGR.F             | 1        |                        |
|            |                                                                               |                  |     |       | 4.2E-02 | K.TDNALLDFVDR.V            |          |                        |
|            |                                                                               |                  |     |       | 1.4E-06 | K.SSDIVLLDDNFR.S           |          |                        |
| EAN82723.1 | glutamate dehydrogenase, putative                                             | 43888            | 108 | 3     | 9.8E-02 | K.WQPFVNPQPK.L             | 1        |                        |
|            |                                                                               |                  |     |       | 6.1E-04 | K.GSVGPVFTLVDGK.D          |          |                        |
|            |                                                                               |                  |     |       | 4.2E-06 | R.GYTDDGTTSVYAK.W          |          |                        |
| EAN85113.1 | elongation factor 1-gamma (EF-1-gamma), putative                              | 47053            | 104 | 3     | 1.0E-04 | R.ALEAWLETR.T              | 0        |                        |
|            |                                                                               |                  |     |       | 6.0E-03 | R.LNGAEGEALTK.K            |          |                        |
|            |                                                                               |                  |     |       | 8.1E-03 | R.LYNTVMQQPK.T + Oxidation |          |                        |

| Band no.   | Accession no.                                                           | Protein Identity | Mr  | SCORE | # PEPT.                       | Mascot                                                                  |          | Additional gene copies |
|------------|-------------------------------------------------------------------------|------------------|-----|-------|-------------------------------|-------------------------------------------------------------------------|----------|------------------------|
|            |                                                                         |                  |     |       |                               | E-value                                                                 | Sequence |                        |
| EAN97907.1 | lanosterol synthase, putative                                           | 103755           | 102 | 3     | 7.0E-01<br>5.7E-04<br>1.9E-06 | R.HNPFSVSR.I<br>R.RAEINAAIR.E<br>R.IRDAVDEILSLR.N                       | 1        |                        |
| EAN81429.1 | hypothetical protein, conserved                                         | 69263            | 90  | 1     | 1.5E-09                       | K.TLLTVLNGVGSAAAGR.L                                                    | 7        |                        |
| EAN84271.1 | glutamate dehydrogenase, putative                                       | 24319            | 89  | 3     | 1.6E-03<br>3.8E-01<br>4.2E-05 | R.ANILASDVFK.N<br>K.TLISDTLSEK.N<br>K.TLLEVVVPVDELMNR.V + Oxidation     | 0        |                        |
| EAN81982.1 | plasma-membrane proton-efflux P-type<br>ATPase, putative                | 54076            | 84  | 2     | 2.2E-07<br>6.5E-03            | R.SVLVLAALAAK.W<br>K.NSLKPVATVHR.D                                      | 1        |                        |
| EAN85055.1 | histone H4, putative                                                    | 11177            | 82  | 2     | 1.1E-02<br>2.1E-05            | R.ISGIYDEVR.G<br>K.TVTAVDVVNALR.K                                       | 7        |                        |
| EAN81197.1 | hypothetical protein, conserved                                         | 30269            | 77  | 3     | 1.2E-01<br>1.8E-04<br>6.0E-03 | K.NLKPGVLLTHS.-<br>K.LFVNPMATSDGK.F + Oxidation (M)<br>R.SYTTSFVTPIPK.C | 2        |                        |
| EAN80692.1 | farnesyl synthetase, putative                                           | 32609            | 70  | 1     | 3.0E-07                       | R.AVLAGDFLLAR.A                                                         | 1        |                        |
| EAN91538.1 | hypothetical protein, conserved                                         | 97545            | 69  | 2     | 2.7E-03<br>3.3E-04            | R.LADELEQK.A<br>R.LAAEELEQK.A                                           | 2        |                        |
| EAN92997.1 | carbonic anhydrase-like protein, putative                               | 59297            | 69  | 3     | 7.9E-03<br>3.7E-01<br>2.0E-03 | R.LVEAFQR.S<br>K.DMGPLVFSR.G<br>R.NSTAGENETESLFR.S                      | 0        |                        |
| EAN85276.1 | hypothetical protein                                                    | 52756            | 65  | 2     | 2.7E-01<br>1.6E-05            | R.HIDASLLSR.L<br>R.FADANEENVPAQVNR.V                                    | 1        |                        |
| EAN95173.1 | ATP-dependent RNA helicase, putative                                    | 90610            | 65  | 2     | 6.4E-02<br>4.4E-05            | K.FLVLDEADR.M<br>K.LFEVIYQOK.Q                                          | 1        |                        |
| EAN85214.1 | hypothetical protein, conserved                                         | 21287            | 65  | 2     | 6.9E-02<br>9.5E-05            | K.HALSSFLK.D<br>K.SVGLTAALSPR.Q                                         | 0        |                        |
| EAN90413.1 | ADP,ATP carrier protein 1,<br>mitochondrial precursor, putative         | 35303            | 60  | 2     | 3.1E-01<br>3.2E-05            | K.TVAAPIER.V<br>K.LLVQNQGEMIK.Q + Oxidation                             | 1        |                        |
| EAN92899.1 | coatomer gamma subunit, putative                                        | 84629            | 58  | 1     | 8.0E-06                       | R.SAVLNTVAEDIGR.Q                                                       | 1        |                        |
| EAN81193.1 | ATP-dependent Clp protease subunit,<br>heat shock protein 100, putative | 28801            | 58  | 1     | 6.8E-06                       | R.LDDIVLFR.R                                                            | 0        |                        |
| EAN82317.1 | glutamamyl carboxypeptidase, putative                                   | 44248            | 57  | 2     | 9.9E-03<br>1.8E-03            | K.LVAFDTSR.N<br>K.ANLWATLPGDGGVTK.G                                     | 5        |                        |
| EAN90819.1 | DNA topoisomerase IA, putative                                          | 92252            | 54  | 1     | 5.8E-06                       | R.IFGFLGSSVVR.A                                                         | 1        |                        |
| EAO00045.1 | aconitase, putative                                                     | 99497            | 52  | 2     | 2.8E-01<br>1.3E-04            | R.YVTPELFK.S<br>K.VVIAESFER.I                                           | 0        |                        |

| Band no.   | Accession no. | Protein Identity                                                                   | Mr     | SCORE | # PEPT. | E-value                       | Mascot                                        | Additional gene copies |
|------------|---------------|------------------------------------------------------------------------------------|--------|-------|---------|-------------------------------|-----------------------------------------------|------------------------|
|            |               |                                                                                    |        |       |         |                               | Sequence                                      |                        |
| EAN90081.1 |               | ATP-dependent RNA helicase, putative                                               | 69517  | 51    | 2       | 5.2E-02<br>1.6E-03            | R.AISFFNEK.N<br>R.GYVTFSSIR.F                 | 1                      |
| EAN97573.1 |               | vacuolar protein sorting-associated protein 35, putative                           | 102329 | 50    | 1       | 8.2E-05                       | K.AVEAQSQVQR.K                                | 0                      |
| EAN82045.1 |               | hypothetical protein, conserved                                                    | 101365 | 48    | 1       | 7.9E-05                       | K.ATTTATEELR.V                                | 0                      |
| EAN90017.1 |               | hypothetical protein, conserved                                                    | 110588 | 46    | 3       | 2.1E-02<br>3.8E-01<br>5.6E-02 | R.LFIESIPR.V<br>R.HVGQYGTPK.D<br>K.LFVEFSPR.I | 1                      |
| EAN88964.1 |               | glycosomal phosphoenolpyruvate carboxykinase, putative                             | 59404  | 45    | 1       | 5.8E-05                       | R.VWLLNTGYAGGR.A                              | 1                      |
| EAN88665.1 |               | 60S ribosomal protein L10, putative                                                | 25170  | 45    | 1       | 1.0E-04                       | R.ELEQISSEALEAAR.I                            | 3                      |
| EAN87063.1 |               | hypothetical protein, conserved                                                    | 44364  | 41    | 2       | 1.9E-02<br>6.7E-02            | K.ALTEEWILGR.K<br>K.ANESLDVNLNGQYTR.E         | 0                      |
| EAN82747.1 |               | Gim5A protein, putative                                                            | 27268  | 39    | 1       | 8.9E-05                       | R.LSLLLNALSSK.T                               | 2                      |
| EAN99050.1 |               | phosphoglycerate kinase, putative                                                  | 100682 | 38    | 1       | 7.6E-04                       | R.AFATILAQER.K                                | 0                      |
| EAN92121.1 |               | fatty acid elongase, putative                                                      | 32936  | 37    | 1       | 6.1E-04                       | R.DGATSVAPAR.Q                                | 1                      |
| EAN83495.1 |               | 40S ribosomal protein S3a, putative                                                | 28554  | 37    | 1       | 8.2E-04                       | K.FVVQEVQGR.N                                 | 4                      |
| EAN81916.1 |               | ATP synthase, alpha chain, mitochondrial precursor, putative PAS-domain containing | 25912  | 35    | 1       | 6.8E-04                       | R.SPVNYNLLTGFK.A                              | 0                      |
| EAN91697.1 |               | phosphoglycerate kinase, putative                                                  | 58534  | 33    | 1       | 7.4E-04                       | R.ILGAGVTGYLIDR.E                             | 1                      |
| EAN89775.1 |               | NUP-1 protein, putative                                                            | 88038  | 32    | 1       | 4.0E-03                       | R.VAELTAAVAR.L                                | 0                      |
| EAN81577.1 |               | trichohyalin, putative                                                             | 54815  | 31    | 1       | 1.3E-03                       | R.QLEQELK.A                                   | 1                      |
| EAN83138.1 |               | calpain cysteine peptidase, putative mitochondrial malate dehydrogenase, putative  | 146488 | 29    | 1       | 1.2E-03                       | R.AFLDQKPEGVPLR.E                             | 1                      |
| EAN87359.1 |               | putative                                                                           | 31921  | 28    | 1       | 2.9E-03                       | R.LFGVTTLDLVR.A                               | 1                      |
| EAN83327.1 |               | hypothetical protein, conserved                                                    | 80349  | 27    | 1       | 8.4E-03                       | K.LTDEQLVEVR.W                                | 0                      |
| EAN82549.1 |               | ribosomal protein L21E (60S), putative                                             | 18285  | 27    | 1       | 7.4E-03                       | R.TGIVWNVTPR.G                                | 1                      |
| EAN85088.1 |               | RNA-binding protein, putative mitochondrial DNA polymerase beta, putative          | 18816  | 24    | 1       | 1.1E-02                       | K.SAQQLVDFFR.Q                                | 1                      |
| EAN91887.1 |               | putative                                                                           | 45752  | 23    | 1       | 1.1E-02                       | R.SVPTALLTFTGSK.N                             | 1                      |
| EAN97986.1 |               | RNA helicase, putative                                                             | 98795  | 20    | 1       | 3.4E-02                       | R.VLVATDIASR.G                                | 0                      |
| EAN88441.1 |               | hypothetical protein, conserved                                                    | 47220  | 18    | 1       | 5.1E-02                       | R.ALLSLSPIR.I                                 | 1                      |
| EAN83893.1 |               | hypothetical protein, conserved                                                    | 107055 | 17    | 1       | 6.9E-02                       | K.LSSAVNLLR.I                                 | 1                      |

**TABLE S5 (SPOTS 1-29): COMPLETE PEPTIDE LIST**

| Spot no.   | Accession no.                                      | Protein Identity                                  | Mr    | SCORE | # PEPT. | E-value                            | Mascot Sequence                            | Additional gene copies under same match |
|------------|----------------------------------------------------|---------------------------------------------------|-------|-------|---------|------------------------------------|--------------------------------------------|-----------------------------------------|
| Spot 1     | EAN83392.1                                         | calmodulin, putative                              | 16814 | 261   | 6       | 5.1E-03                            | K.ELGTVMR.S + Oxidation (M)                | 3                                       |
|            |                                                    |                                                   |       |       |         | 1.7E-03                            | R.HVMTNLGEK.L + Oxidation (M)              |                                         |
|            |                                                    |                                                   |       |       |         | 1.5E-05                            | K.LTDEEVDEMIR.E + Oxidation (M)            |                                         |
|            |                                                    |                                                   |       |       |         | 3.3E-08                            | R.VFDKDGNGFISAAELR.H                       |                                         |
|            |                                                    |                                                   |       |       |         | 1.5E-03                            | K.MQSDSDEEIKEAFR.V + Oxidation (M)         |                                         |
|            |                                                    |                                                   |       |       |         | 5.7E-04                            | K.EAFSLFDKGDGTITTK.E                       |                                         |
| EAN97655.1 | chaperonin HSP60, mitochondrial precursor          | 59991                                             | 168   | 3     | 6.9E-06 | R.YVNMFEAGIIDPAR.V + Oxidation (M) | 2                                          |                                         |
|            |                                                    |                                                   |       |       | 2.3E-07 | K.VLENNDVTVGYDAQR.D                |                                            |                                         |
|            |                                                    |                                                   |       |       | 2.6E-04 | K.VLENNDVTVGYDAQRDR.Y              |                                            |                                         |
| EAN94839.1 | beta tubulin, putative                             | 50520                                             | 79    | 1     | 1.4E-08 | R.INVYFDEATGGR.Y                   | 0                                          |                                         |
| EAN89727.1 | calmodulin, putative                               | 17154                                             | 58    | 1     | 4.0E-06 | K.TGFINTDLK.F                      | 1                                          |                                         |
| EAN88441.1 | hypothetical protein, conserved                    | 47220                                             | 19    | 1     | 3.5E-02 | R.ALLSLSPR.I                       | 1                                          |                                         |
| 2          | EAN98394.1                                         | p22 protein precursor, putative                   | 26158 | 363   | 9       | 4.5E-04                            | K.LDELDER.L                                | 0                                       |
|            |                                                    |                                                   |       |       |         | 3.3E-03                            | K.HEDEEIVIR.C                              |                                         |
|            |                                                    |                                                   |       |       |         | 2.7E-04                            | K.GPKLDELDER.L                             |                                         |
|            |                                                    |                                                   |       |       |         | 2.0E-05                            | R.HELEEEQQR.S                              |                                         |
|            |                                                    |                                                   |       |       |         | 4.0E-03                            | R.KPGQMLFTMR.K + 2 Oxidation (M)           |                                         |
|            |                                                    |                                                   |       |       |         | 8.7E-07                            | K.LALDDSVENQK.R                            |                                         |
|            |                                                    |                                                   |       |       |         | 2.2E-04                            | R.LVDSLTSYLKDR.G                           |                                         |
|            |                                                    |                                                   |       |       |         | 6.5E-07                            | K.LALDDSVENQK.R.Q                          |                                         |
|            |                                                    |                                                   |       |       |         | 8.9E-01                            | R.MSFESEEVIMGQVSFLDDAK.L + 2 Oxidation (M) |                                         |
|            |                                                    |                                                   |       |       |         | 9.8E-06                            | K.HEDEEIIIR.C                              |                                         |
| 3.2E-07    | K.LALDDSVENR.K                                     |                                                   |       |       |         |                                    |                                            |                                         |
| EAN84508.1 | IgE-dependent histamine-releasing factor, putative | 19717                                             | 82    | 2     | 1.4E-04 | R.VVDVHNNR.Y                       | 1                                          |                                         |
|            |                                                    |                                                   |       |       | 2.1E-04 | K.FQANAAAFVK.K                     |                                            |                                         |
| EAN81053.1 | alpha tubulin, putative                            | 50549                                             | 31    | 1     | 3.2E-03 | K.DVNAAVATIK.T                     | 1                                          |                                         |
| EAN88441.1 | hypothetical protein, conserved                    | 47220                                             | 19    | 1     | 3.5E-02 | R.ALLSLSPR.I                       | 1                                          |                                         |
| 3          | EAN83132.1                                         | hypothetical protein, conserved                   | 26313 | 44    | 2       | 1.6E-03                            | R.LYWQEPAK.V                               | 1                                       |
|            |                                                    |                                                   |       |       |         | 3.4E-01                            | K.LMDQSLPVYDDVVTGSGR.L + Oxidation (M)     |                                         |
| 4          | EAN84330.1                                         | mucin-associated surface protein (MASP), putative | 44673 | 21    | 1       | 2.8E-02                            | K.VAISLPSR.M                               | 1                                       |

**Note:** The table shows the list of hits extracted from the Mascot html output results for the 2DGE spots. Mr indicates the theoretical molecular weight of the protein; Score refers to the Mascot protein score; # Pept refers to the number of peptides matched to each hit with the respective peptide e-value. Only unique peptides to each hit are indicated, not the ones shared with the previous hit. Additional gene copies column, indicates how many other annotated proteins are matched to the same set of peptides; meaning copies of the same gene product. This table is not filtered, meaning several proteins appear in more than one band; either due to proteolysis or carry over during the mass spectrometry analysis from one sample to the other one.

| Spot no.   | Accession no.                    | Protein Identity                             | Mr    | SCORE | # PEPT. | Mascot         |                                        | Additional gene copies |
|------------|----------------------------------|----------------------------------------------|-------|-------|---------|----------------|----------------------------------------|------------------------|
|            |                                  |                                              |       |       |         | E-value        | Sequence                               |                        |
| 5          | EAN83132.1                       | hypothetical protein, conserved              | 26313 | 144   | 2       | 2.7E-03        | R.LYWQEPK.V                            | 1                      |
|            |                                  |                                              |       |       |         | 2.8E-11        | K.LMDQSLPVYDDVVTGSGR.L + Oxidation (M) |                        |
|            | EAN84888.1                       | tryparedoxin peroxidase, putative            | 25774 | 62    | 2       | 1.1E-02        | R.NVEEVLR.V                            | 0                      |
|            |                                  |                                              |       |       |         | 9.7E-04        | R.HITVNDLPVGR.N                        |                        |
|            | EAN83371.1                       | hypothetical protein, conserved              | 30261 | 54    | 1       | 1.0E-05        | R.TLNQSLSPVGR.D                        | 1                      |
|            |                                  | 25 kDa translation elongation factor 1-      |       |       |         |                |                                        |                        |
|            | EAN82455.1                       | beta                                         | 24437 | 28    | 1       | 6.9E-04        | K.LVPVAFGVK.K                          | 2                      |
|            | mucin-associated surface protein |                                              |       |       |         |                |                                        |                        |
| EAN84330.1 | (MASP), putative                 | 44673                                        | 18    | 1     | 5.8E-02 | K.VAISLPSR.M   | 1                                      |                        |
| EAN91318.1 | I/6 autoantigen, putative        | 23495                                        | 18    | 1     | 2.8E-02 | K.ESVPAAAAPK.K | 1                                      |                        |
| 6          | EAN84888.1                       | tryparedoxin peroxidase, putative            | 25774 | 239   | 6       | 6.7E-03        | R.NVEEVLR.V                            | 0                      |
|            |                                  |                                              |       |       |         | 7.2E-05        | K.ANEYFEK.N                            |                        |
|            |                                  |                                              |       |       |         | 8.9E-05        | R.EAAPEWAGK.A                          |                        |
|            |                                  |                                              |       |       |         | 9.2E-06        | R.VVQAFQYVDK.N                         |                        |
|            |                                  |                                              |       |       |         | 2.8E-03        | R.HITVNDLPVGR.N                        |                        |
|            |                                  |                                              |       |       |         | 9.1E-05        | R.GLFIIDDKGILR.H                       |                        |
|            | EAN83132.1                       | hypothetical protein, conserved              | 26313 | 124   | 2       | 8.4E-04        | R.LYWQEPK.V                            | 1                      |
|            |                                  | translation elongation factor 1-beta,        |       |       |         |                |                                        |                        |
|            | EAN96820.1                       | putative                                     | 21996 | 93    | 3       | 2.1E-03        | K.LVPVAFGVK.K                          | 0                      |
|            |                                  |                                              |       |       |         | 3.7E-05        | R.MASYQAER.E + Oxidation (M)           |                        |
|            |                                  |                                              |       |       |         | 8.2E-03        | R.MASYQAEREQILK.G + Oxidation (M)      |                        |
|            | EAN91318.1                       | I/6 autoantigen, putative                    | 23495 | 46    | 1       | 6.5E-05        | R.EAAAAAAAAAAPK.E                      | 0                      |
|            | EAN83371.1                       | hypothetical protein, conserved              | 30261 | 39    | 1       | 3.2E-04        | R.TLNQSLSPVGR.D                        | 1                      |
|            | mucin-associated surface protein |                                              |       |       |         |                |                                        |                        |
| EAN84330.1 | (MASP), putative                 | 44673                                        | 20    | 1     | 3.8E-02 | K.VAISLPSR.M   | 1                                      |                        |
| EAN82747.1 | Gim5A protein, putative          | 27268                                        | 17    | 1     | 8.4E-02 | R.GVLNSGLTR.F  | 3                                      |                        |
| 7          | <b>Sample lost</b>               |                                              |       |       |         |                |                                        |                        |
| 8          | EAO00075.1                       | cytochrome C oxidase subunit IV,<br>putative | 39137 | 724   | 23      | 1.5E-03        | R.EYADEAK.S                            | 0                      |
|            |                                  |                                              |       |       |         | 3.2E-04        | R.ILDIYAR.A                            |                        |
|            |                                  |                                              |       |       |         | 5.7E-03        | R.HITPEAIK.A                           |                        |
|            |                                  |                                              |       |       |         | 3.4E-04        | R.LENTMIAR.I                           |                        |
|            |                                  |                                              |       |       |         | 3.8E-04        | R.LTAWLPEK.Y                           |                        |
|            |                                  |                                              |       |       |         | 2.9E-05        | R.LENTMIAR.I + Oxidation (M)           |                        |
|            |                                  |                                              |       |       |         | 2.9E-03        | R.TEEETAFK.S                           |                        |
|            |                                  |                                              |       |       |         | 2.6E-03        | K.EFGNEVTFR.L                          |                        |
|            |                                  |                                              |       |       |         | 9.6E-07        | R.VVHEYNGDDR.I                         |                        |
|            |                                  |                                              |       |       |         | 4.1E-02        | K.FTGEPSPWMR.Q + Oxidation (M)         |                        |
|            |                                  |                                              |       |       |         | 5.5E-06        | R.KEFGNEVTFR.L                         |                        |

| Spot no.   | Accession no.                                                                  | Protein Identity                          | Mr    | SCORE | # PEPT. | E-value                             | Mascot<br>Sequence                 | Additional gene copies |
|------------|--------------------------------------------------------------------------------|-------------------------------------------|-------|-------|---------|-------------------------------------|------------------------------------|------------------------|
| 8 cont.    | EAO00075.1                                                                     | cont.                                     |       |       |         | 1.8E-02                             | R.ERTEEETAFK.S                     |                        |
|            |                                                                                |                                           |       |       |         | 1.8E-05                             | R.EMLNIVQNVER.E                    |                        |
|            |                                                                                |                                           |       |       |         | 4.2E-05                             | R.EMLNIVQNVER.E + Oxidation (M)    |                        |
|            |                                                                                |                                           |       |       |         | 6.5E-04                             | R.WNVNTEHPADR.A                    |                        |
|            |                                                                                |                                           |       |       |         | 1.6E-03                             | K.EFGNEVTFRLEK.Q                   |                        |
|            |                                                                                |                                           |       |       |         | 9.1E-08                             | R.IFDEEHVQAEMK.Y                   |                        |
|            |                                                                                |                                           |       |       |         | 1.8E-04                             | R.IFDEEHVQAEMK.Y + Oxidation (M)   |                        |
|            |                                                                                |                                           |       |       |         | 1.1E-02                             | R.REMLNIVQNVER.E + Oxidation (M)   |                        |
|            |                                                                                |                                           |       |       |         | 1.7E-02                             | K.SSSDERLENTMIAR.I                 |                        |
|            |                                                                                |                                           |       |       |         | 9.1E-04                             | K.SSSDERLENTMIAR.I + Oxidation (M) |                        |
|            |                                                                                |                                           |       |       |         | 1.3E-03                             | R.WYGHAELELDHNYK.F                 |                        |
|            |                                                                                |                                           |       |       |         | 3.3E-04                             | R.ANELAEDNRLDILPGGSPNSLR.E         |                        |
| EAN82710.1 | glutamamyl carboxypeptidase, putative                                          | 44359                                     | 123   | 3     | 1.3E-03 | R.ALPNETVSK.M                       | 0                                  |                        |
|            |                                                                                |                                           |       |       | 1.7E-04 | K.LVAFDTTSR.N                       |                                    |                        |
|            |                                                                                |                                           |       |       | 4.4E-05 | R.DETPSFEGSEEAPITK.L                |                                    |                        |
| EAN94839.1 | beta tubulin, putative                                                         | 50520                                     | 99    | 2     | 1.9E-06 | R.INVYFDEATGGR.Y                    | 0                                  |                        |
|            |                                                                                |                                           |       |       | 2.8E-04 | R.AVLIDLEPGTMDSVR.A + Oxidation (M) |                                    |                        |
| EAN97655.1 | chaperonin HSP60, mitochondrial precursor                                      | 59991                                     | 96    | 2     | 9.6E-02 | R.LIGQAMEK.V + Oxidation (M)        | 1                                  |                        |
|            |                                                                                |                                           |       |       | 4.5E-08 | K.VGGGSEVEVNEK.K                    |                                    |                        |
| EAN84370.1 | heat shock 70 kDa protein, mitochondrial precursor, putative                   | 71585                                     | 50    | 1     | 4.3E-05 | K.EISEVVLVGGMTR.M + Oxidation (M)   | 0                                  |                        |
| EAN90241.1 | 2-oxoisovalerate dehydrogenase beta subunit, mitochondrial precursor, putative | 40776                                     | 46    | 2     | 6.5E-01 | R.VIVTHEAPK.T                       | 1                                  |                        |
|            |                                                                                |                                           |       |       | 2.5E-04 | K.IVMPSTPSDAK.G + Oxidation (M)     |                                    |                        |
| EAN81195.1 | succinyl-CoA ligase [GDP-forming] beta-chain, putative                         | 35009                                     | 32    | 1     | 2.6E-03 | R.ASENAAEQVK.A                      | 0                                  |                        |
| EAN84330.1 | mucin-associated surface protein (MASP), putative                              | 44673                                     | 18    | 1     | 6.0E-02 | K.VAISLPSR.M                        | 1                                  |                        |
| 9          | EAN99021.1                                                                     | cytochrome C oxidase subunit IV, putative | 39097 | 1038  | 30      | 5.9E-03                             | R.LNGHLNR.K                        | 0                      |
|            |                                                                                |                                           |       |       | 1.5E-03 | R.EYADEAK.S                         |                                    |                        |
|            |                                                                                |                                           |       |       | 3.2E-04 | R.ILDIYAR.A                         |                                    |                        |
|            |                                                                                |                                           |       |       | 1.4E-03 | R.HITSEAIK.A                        |                                    |                        |
|            |                                                                                |                                           |       |       | 9.0E-04 | R.LTAWLPEK.Y                        |                                    |                        |
|            |                                                                                |                                           |       |       | 5.0E-06 | R.LENTMIAR.I + Oxidation (M)        |                                    |                        |
|            |                                                                                |                                           |       |       | 2.1E-04 | K.NADHQALVK.N                       |                                    |                        |
|            |                                                                                |                                           |       |       | 1.8E-03 | R.TEEETAFK.S                        |                                    |                        |

| Spot no. | Accession no. | Protein Identity                             | Mr    | SCORE | # PEPT. | E-value | Mascot<br>Sequence                 | Additional gene copies |
|----------|---------------|----------------------------------------------|-------|-------|---------|---------|------------------------------------|------------------------|
| 9 cont.  | EAN99021.1    | cont.                                        |       |       |         | 1.2E-05 | R.ANELAEDNRL                       |                        |
|          |               |                                              |       |       |         | 4.7E-05 | K.EFGNEVTFR.L                      |                        |
|          |               |                                              |       |       |         | 3.1E-03 | R.VVHEYNGDDR.I                     |                        |
|          |               |                                              |       |       |         | 8.5E-04 | K.FTGEPSPWMR.Q                     |                        |
|          |               |                                              |       |       |         | 1.3E-02 | K.FTGEPSPWMR.Q + Oxidation (M)     |                        |
|          |               |                                              |       |       |         | 5.2E-03 | R.KEFGNEVTFR.L                     |                        |
|          |               |                                              |       |       |         | 4.6E-06 | R.ERTEEETAFK.S                     |                        |
|          |               |                                              |       |       |         | 7.0E-06 | R.EMLNIVQNVER.E                    |                        |
|          |               |                                              |       |       |         | 2.5E-05 | R.EMLNIVQNVER.E + Oxidation (M)    |                        |
|          |               |                                              |       |       |         | 1.2E-04 | R.WNVNTELHPADR.A                   |                        |
|          |               |                                              |       |       |         | 3.3E-02 | K.EFGNEVTFRLEK.Q                   |                        |
|          |               |                                              |       |       |         | 7.5E-04 | K.EFGNEVTFRLEK.Q                   |                        |
|          |               |                                              |       |       |         | 2.4E-06 | R.IFDEEHVQAEMK.Y                   |                        |
|          |               |                                              |       |       |         | 4.2E-03 | R.IFDEEHVQAEMK.Y + Oxidation (M)   |                        |
|          |               |                                              |       |       |         | 1.2E-02 | R.REMLNIVQNVER.E + Oxidation (M)   |                        |
|          |               |                                              |       |       |         | 3.4E-05 | K.EVVNELLDVDPDR.H                  |                        |
|          |               |                                              |       |       |         | 2.3E-02 | K.SSSDERLENTMIAR.I                 |                        |
|          |               |                                              |       |       |         | 3.4E-04 | K.SSSDERLENTMIAR.I + Oxidation (M) |                        |
|          |               |                                              |       |       |         | 1.9E-06 | K.ACTDLNQLLEWSR.V                  |                        |
|          |               |                                              |       |       |         | 7.2E-04 | R.WYGHAELELDHSHNYK.F               |                        |
|          |               |                                              |       |       |         | 1.3E+00 | R.VVHEYNGDDRILDIYAR.A              |                        |
|          |               |                                              |       |       |         | 1.6E-04 | K.YHIVYFDDFQTVAAANDPSAR.R          |                        |
|          |               |                                              |       |       |         | 1.6E-06 | R.ANELAEDNRLDILPGGSPNSLR.E         |                        |
|          | EAO00075.1    | cytochrome C oxidase subunit IV,<br>putative | 39137 | 1032  | 29      | 9.1E-03 | R.HITPEAIK.A                       | 0                      |
|          | EAN82710.1    | glutamamyl carboxypeptidase, putative        | 44359 | 262   | 7       | 3.3E-02 | R.ALPNETVSK.M                      | 0                      |
|          |               |                                              |       |       |         | 6.7E-05 | K.LVAFDTTSR.N                      |                        |
|          |               |                                              |       |       |         | 3.1E-02 | R.EIAEEYRR.N                       |                        |
|          |               |                                              |       |       |         | 4.4E-04 | R.SYVETQLLPAMK.A + Oxidation (M)   |                        |
|          |               |                                              |       |       |         | 7.8E-05 | K.AEFEDAIVITPR.D                   |                        |
|          |               |                                              |       |       |         | 2.5E-06 | R.DETPSFEGSEEAPITK.L               |                        |
|          |               |                                              |       |       |         | 3.9E-03 | K.GGIILSGHTDVVPVDGQK.W             |                        |
|          | EAN97655.1    | chaperonin HSP60, mitochondrial<br>precursor | 59991 | 138   | 2       | 7.3E-06 | K.VGGGSEVEVNEK.K                   | 1                      |
|          |               |                                              |       |       |         | 8.3E-09 | R.AVGVILQSVAEQSR.K                 |                        |



| Spot no.   | Accession no.                                                                  | Protein Identity                                                 | Mr    | SCORE | # PEPT. | E-value                         | Mascot<br>Sequence                  | Additional gene copies |
|------------|--------------------------------------------------------------------------------|------------------------------------------------------------------|-------|-------|---------|---------------------------------|-------------------------------------|------------------------|
| 9 cont.    | EAN81195.1                                                                     | succinyl-CoA ligase [GDP-forming] beta-chain, putative           | 35009 | 132   | 3       | 1.8E-03                         | R.ASENAAEQVK.A                      | 0                      |
|            |                                                                                |                                                                  |       |       |         | 1.1E-06                         | K.LSFDDNAEFR.Q                      |                        |
|            |                                                                                |                                                                  |       |       |         | 1.9E-04                         | R.ILQESGLPLHPAR.N                   |                        |
| EAN90241.1 | 2-oxoisovalerate dehydrogenase beta subunit, mitochondrial precursor, putative | 40776                                                            | 67    | 2     | 1.2E-04 | R.VIVTHEAPK.T                   | 1                                   |                        |
|            |                                                                                |                                                                  |       |       | 1.3E-02 | K.IVMPSTPSDAK.G + Oxidation (M) |                                     |                        |
| EAN85543.1 | calpain-like cysteine peptidase, putative                                      | 32320                                                            | 62    | 3     | 1.3E-02 | K.GDAVLVIR.H                    | 1                                   |                        |
|            |                                                                                |                                                                  |       |       | 1.0E-01 | R.ETQLILAK.V                    |                                     |                        |
|            |                                                                                |                                                                  |       |       | 2.0E-02 | R.HNHTNVPLASTK.A                |                                     |                        |
| EAN82883.1 | 3,2-trans-enoyl-CoA isomerase, mitochondrial precursor, putative               | 39837                                                            | 53    | 1     | 2.7E-05 | K.GITTVQLSR.G                   | 1                                   |                        |
| EAN94839.1 | beta tubulin, putative                                                         | 50520                                                            | 49    | 2     | 9.4E-02 | K.LREEYPDR.I                    | 0                                   |                        |
|            |                                                                                |                                                                  |       |       | 7.7E-04 | R.INVYFDEATGGR.Y                |                                     |                        |
| 10         | EAN82883.1                                                                     | 3,2-trans-enoyl-CoA isomerase, mitochondrial precursor, putative | 39837 | 311   | 7       | 3.8E-04                         | K.GLGAYLAR.L                        | 0                      |
|            |                                                                                |                                                                  |       |       |         | 3.6E-04                         | K.GITTVQLSR.G                       |                        |
|            |                                                                                |                                                                  |       |       |         | 3.0E-03                         | R.FMAIPQQR.W + Oxidation (M)        |                        |
|            |                                                                                |                                                                  |       |       |         | 1.7E-04                         | R.QGVPSGVPPELR.A                    |                        |
|            |                                                                                |                                                                  |       |       |         | 1.4E-02                         | R.EAERFMAIPQQR.W + Oxidation (M)    |                        |
|            |                                                                                |                                                                  |       |       |         | 2.5E-06                         | R.MLQLGETPTADEALR.I + Oxidation (M) |                        |
|            |                                                                                |                                                                  |       |       |         | 2.3E-07                         | K.IDTNEKGITTVQLSR.G                 |                        |
| EAN83656.1 | 3,2-trans-enoyl-CoA isomerase, mitochondrial precursor, putative               | 45479                                                            | 298   | 7     | 6.2E-03 | R.QGAPTGVPELR.A                 | 0                                   |                        |
| EAN82710.1 | glutamamyl carboxypeptidase, putative                                          | 44359                                                            | 129   | 4     | 3.2E-03 | R.ALPNETVSK.M                   | 0                                   |                        |
|            |                                                                                |                                                                  |       |       | 1.1E-03 | K.LVAFDTTSR.N                   |                                     |                        |
|            |                                                                                |                                                                  |       |       | 6.0E-03 | R.EIAEEYRR.N                    |                                     |                        |
|            |                                                                                |                                                                  |       |       | 5.2E-04 | R.DETPSFEGSEEAPITK.L            |                                     |                        |
|            |                                                                                |                                                                  |       |       | 1.9E-03 | K.DVCAATNPR.Q                   |                                     |                        |
| 11         | EAO00025.1                                                                     | alcohol dehydrogenase, putative                                  | 42442 | 596   | 14      | 2.3E-02                         | K.IYRESM.- + Oxidation (M)          | 0                      |
|            |                                                                                |                                                                  |       |       |         | 3.0E-02                         | K.DGKNLVAR.E                        |                        |
|            |                                                                                |                                                                  |       |       |         | 3.6E-03                         | R.FAVITDEK.R                        |                        |
|            |                                                                                |                                                                  |       |       |         | 1.9E-03                         | K.DVCAATNPR.Q                       |                        |
|            |                                                                                |                                                                  |       |       |         | 8.7E-09                         | K.NAAAAAIDAIR.A                     |                        |
|            |                                                                                |                                                                  |       |       |         | 4.9E-06                         | R.FAVITDEKR.H                       |                        |
|            |                                                                                |                                                                  |       |       |         | 3.2E-02                         | K.DIPALAESALK.D                     |                        |
|            |                                                                                |                                                                  |       |       |         | 3.0E-05                         | K.AGILETVMDVLK.K + Oxidation (M)    |                        |
| 2.2E-05    | K.EKDIPALAESALK.D                                                              |                                                                  |       |       |         |                                 |                                     |                        |

| Spot no.   | Accession no.                         | Protein Identity | Mr    | SCORE | # PEPT. | E-value | Mascot<br>Sequence                   | Additional gene copies |
|------------|---------------------------------------|------------------|-------|-------|---------|---------|--------------------------------------|------------------------|
| 11 cont.   | EAO00025.1                            | cont.            |       |       |         | 5.7E-06 | K.KPLLVCDTGIEK.A                     |                        |
|            |                                       |                  |       |       |         | 1.5E-06 | K.VSYLGVGALDSATSK.M                  |                        |
|            |                                       |                  |       |       |         | 1.6E-06 | K.ANGGTIYDYEGLDK.A                   |                        |
|            |                                       |                  |       |       |         | 2.3E-05 | K.EVQIPSGFEQLGMK.E + Oxidation (M)   |                        |
|            |                                       |                  |       |       |         | 2.3E+00 | K.EVQIPSGFEQLGMKEK.D + Oxidation (M) |                        |
| EAN97413.1 | alcohol dehydrogenase, putative       |                  | 42479 | 581   | 14      | 1.3E-03 | K.EVQIPPGFEQLGMK.E + Oxidation (M)   | 0                      |
|            |                                       |                  |       |       |         | 1.6E+00 | K.EVQIPPGFEQLGMKEK.D + Oxidation (M) |                        |
| EAN99752.1 | prostaglandin F2alpha synthase        |                  | 42496 | 424   | 10      | 9.1E-04 | K.VDAVAFGAK.F                        | 0                      |
|            |                                       |                  |       |       |         | 6.0E-03 | R.IIMAPLTR.C + Oxidation (M)         |                        |
|            |                                       |                  |       |       |         | 2.3E-05 | K.SDQDPLAGR.L                        |                        |
|            |                                       |                  |       |       |         | 4.3E-04 | R.IPAYFAASGEK.E                      |                        |
|            |                                       |                  |       |       |         | 1.0E-03 | R.CQLIYDVTK.S                        |                        |
|            |                                       |                  |       |       |         | 4.2E-04 | K.FIANPDLVER.A                       |                        |
|            |                                       |                  |       |       |         | 1.0E-04 | R.QSGPYAGTTIDTR.C                    |                        |
|            |                                       |                  |       |       |         | 4.3E-07 | R.YDFEADQQIR.E                       |                        |
|            |                                       |                  |       |       |         | 1.0E-03 | R.LLAPSAIPIKDHR.I                    |                        |
|            |                                       |                  |       |       |         | 1.1E-06 | R.TAVGYNDYPTYNK.-                    |                        |
| EAN85497.1 | glutamamyl carboxypeptidase, putative |                  | 44390 | 366   | 9       | 4.3E-03 | R.ALPNETVSK.M                        | 0                      |
|            |                                       |                  |       |       |         | 8.9E-06 | K.LVAFDTSR.N                         |                        |
|            |                                       |                  |       |       |         | 4.9E-03 | R.EIAEEYRR.N                         |                        |
|            |                                       |                  |       |       |         | 3.5E-03 | R.SMDHTQWLAK.L + Oxidation (M)       |                        |
|            |                                       |                  |       |       |         | 1.4E-03 | R.SYVETQLLPAMK.A + Oxidation (M)     |                        |
|            |                                       |                  |       |       |         | 1.9E-05 | K.AEFEDAEIVITPR.D                    |                        |
|            |                                       |                  |       |       |         | 3.3E-02 | K.ANLWATLPGDGGVTK.G                  |                        |
|            |                                       |                  |       |       |         | 2.1E-07 | R.DETPSFEGSEEAPFTK.L                 |                        |
|            |                                       |                  |       |       |         | 1.8E-05 | K.GGILSGHTDVVPVDGQK.W                |                        |
| EAN85498.1 | glutamamyl carboxypeptidase, putative |                  | 44258 | 347   | 9       | 2.7E-05 | R.NETPSFEGSEEAPFTK.L                 | 0                      |
| EAN82710.1 | glutamamyl carboxypeptidase, putative |                  | 44359 | 345   | 9       | 4.9E-05 | R.DETPSFEGSEEAPITK.L                 | 0                      |
|            | aspartate aminotransferase,           |                  |       |       |         |         |                                      |                        |
| EAN86462.1 | mitochondrial, putative               |                  | 46511 | 302   | 7       | 3.6E-01 | K.EQVEMLK.K + Oxidation (M)          | 0                      |
|            |                                       |                  |       |       |         | 1.1E-03 | K.NFGLYGLR.C                         |                        |
|            |                                       |                  |       |       |         | 8.9E-03 | K.SLEAMPER.S + Oxidation (M)         |                        |
|            |                                       |                  |       |       |         | 3.8E-05 | K.VNLAVGVYR.D                        |                        |
|            |                                       |                  |       |       |         | 3.1E-07 | R.VLSQYALLIR.T                       |                        |
|            |                                       |                  |       |       |         | 3.1E-05 | R.TMYSNPPITGAR.I + Oxidation (M)     |                        |
|            |                                       |                  |       |       |         | 9.2E-07 | R.AAISGLNSTNVSYVAK.A                 |                        |

| Spot no.   | Accession no.                                                                   | Protein Identity                                               | Mr    | SCORE | # PEPT. | E-value                          | Mascot<br>Sequence                         | Additional gene copies |
|------------|---------------------------------------------------------------------------------|----------------------------------------------------------------|-------|-------|---------|----------------------------------|--------------------------------------------|------------------------|
| 11 cont.   | EAN92220.1                                                                      | pyruvate dehydrogenase E1 component<br>alpha subunit, putative | 43381 | 136   | 5       | 8.2E-03                          | R.TTQGTVYAKP.-                             | 0                      |
|            |                                                                                 |                                                                |       |       |         |                                  | 7.7E-01 R.AAYQPEMYR.R + Oxidation (M)      |                        |
|            |                                                                                 |                                                                |       |       |         |                                  | 2.8E-05 K.GPIVLEFDSYR.Y                    |                        |
|            |                                                                                 |                                                                |       |       |         |                                  | 2.9E-04 R.GGTPGEVFAEMFGK.E + Oxidation (M) |                        |
|            |                                                                                 |                                                                |       |       |         |                                  | 3.9E-03 R.YVGHSMSPDSQYR.K + Oxidation (M)  |                        |
| EAN84370.1 | heat shock 70 kDa protein,<br>mitochondrial precursor, putative                 | 71585                                                          | 108   | 4     | 1.8E-01 | R.SKVESLAEK.L                    | 0                                          |                        |
|            |                                                                                 |                                                                |       |       |         | 6.1E-05 R.VLENTEGFR.T            |                                            |                        |
|            |                                                                                 |                                                                |       |       |         | 1.7E-03 K.DAGTIAGLNVIR.V         |                                            |                        |
|            |                                                                                 |                                                                |       |       |         | 1.4E-01 R.VVNEPTAAALAYGLDK.T     |                                            |                        |
| EAN86096.1 | fructose-bisphosphate aldolase,<br>glycosomal, putative                         | 23483                                                          | 98    | 3     | 3.8E-03 | R.ALQSSALK.A                     | 3                                          |                        |
|            |                                                                                 |                                                                |       |       |         | 3.0E-01 R.FNAETLAR.Y             |                                            |                        |
|            |                                                                                 |                                                                |       |       |         | 7.1E-06 K.IQNGTVSEAAVR.F         |                                            |                        |
| EAN84558.1 | arginine kinase, putative                                                       | 40528                                                          | 59    | 1     | 2.3E-06 | R.LVTAVGVIEEK.V                  | 0                                          |                        |
| EAN91548.1 | 2- aminoethylphosphonate:<br>pyruvateaminotransferase-like protein,<br>putative | 44677                                                          | 46    | 1     | 4.2E-05 | R.EAQLDDYGSR.D                   | 1                                          |                        |
| EAN96060.1 | glutamamyl carboxypeptidase, putative                                           | 44531                                                          | 42    | 1     | 1.6E-04 | K.LVSFDTTSR.N                    | 0                                          |                        |
| EAN90286.1 | glyceraldehyde 3-phosphate<br>dehydrogenase, putative                           | 39292                                                          | 29    | 1     | 4.6E-03 | K.AVGMVIPSTQGK.L + Oxidation (M) | 3                                          |                        |
| EAN84330.1 | mucin-associated surface protein<br>(MASP), putative                            | 44673                                                          | 21    | 1     | 3.1E-02 | K.VAISLPSR.M                     | 1                                          |                        |
| EAN96732.1 | succinyl-CoA ligase [GDP-forming] beta-<br>chain, putative                      | 46089                                                          | 21    | 1     | 3.8E-02 | R.AAENAAEQVK.A                   | 0                                          |                        |
| EAN93479.1 | acyl-CoA dehydrogenase, putative                                                | 44561                                                          | 19    | 1     | 2.1E-02 | R.SNTYYASSAK.L                   | 1                                          |                        |
| EAN87527.1 | protein phosphatase 2A catalytic<br>subunit, putative                           | 35426                                                          | 18    | 1     | 6.8E-02 | R.TFLETNR.L                      | 1                                          |                        |
| 12         | EAO00025.1                                                                      | alcohol dehydrogenase, putative                                | 42442 | 636   | 13      | 5.7E-02                          | K.IYRESM.- + Oxidation (M)                 | 0                      |
|            |                                                                                 |                                                                |       |       |         |                                  | 7.2E-03 R.FAVITDEK.R                       |                        |
|            |                                                                                 |                                                                |       |       |         |                                  | 1.1E-03 K.DVCAATNPR.Q                      |                        |
|            |                                                                                 |                                                                |       |       |         |                                  | 3.8E-07 K.NAAAAAIDAIR.A                    |                        |
|            |                                                                                 |                                                                |       |       |         |                                  | 2.4E-05 R.FAVITDEKR.H                      |                        |
|            |                                                                                 |                                                                |       |       |         |                                  | 4.1E-05 K.DIPALAESALK.D                    |                        |
|            |                                                                                 |                                                                |       |       |         |                                  | 4.4E-06 K.AGILETVMDVLK.K + Oxidation (M)   |                        |
|            |                                                                                 |                                                                |       |       |         |                                  | 1.1E-04 K.EKDIPALAESALK.D                  |                        |
|            |                                                                                 |                                                                |       |       |         |                                  | 2.7E-05 K.KPLLVCDTGIEK.A                   |                        |
|            |                                                                                 |                                                                |       |       |         |                                  | 6.5E-07 K.ANGGTIYDYEGLDK.A                 |                        |

| Spot no. | Accession no. | Protein Identity                      | Mr    | SCORE | # PEPT. | E-value | Mascot<br>Sequence                   | Additional gene copies |
|----------|---------------|---------------------------------------|-------|-------|---------|---------|--------------------------------------|------------------------|
| 12 cont. | EAO00025.1    | cont.                                 |       |       |         | 1.2E-05 | K.EVQIPSGFEQLGMK.E + Oxidation (M)   |                        |
|          |               |                                       |       |       |         | 2.6E-06 | K.NACDSIIAIGGGSPQDCAK.G              |                        |
|          |               |                                       |       |       |         | 5.8E-07 | K.DVHPNPTAHNVETGLELLNK.N             |                        |
|          | EAN97413.1    | alcohol dehydrogenase, putative       | 42479 | 616   | 14      | 4.4E-03 | K.EVQIPPGFQELGMK.E + Oxidation (M)   | 0                      |
|          |               |                                       |       |       |         | 1.2E+00 | K.EVQIPPGFQELGMKEK.D + Oxidation (M) |                        |
|          | EAN99752.1    | prostaglandin F2alpha synthase        | 42496 | 569   | 15      | 1.4E-03 | K.VDAVAFGAK.F                        | 0                      |
|          |               |                                       |       |       |         | 6.3E-03 | R.IIMAPLTR.C + Oxidation (M)         |                        |
|          |               |                                       |       |       |         | 2.5E-05 | K.SDQDPLAGR.L                        |                        |
|          |               |                                       |       |       |         | 3.8E-04 | R.LLAPSAIPIK.D                       |                        |
|          |               |                                       |       |       |         | 1.8E-03 | K.SVCDAVGSDR.V                       |                        |
|          |               |                                       |       |       |         | 7.9E-04 | R.IPAYFAASGEK.E                      |                        |
|          |               |                                       |       |       |         | 1.3E-03 | R.CQLIYDVTK.S                        |                        |
|          |               |                                       |       |       |         | 4.2E-03 | K.FIANPDLVER.A                       |                        |
|          |               |                                       |       |       |         | 2.2E-03 | R.EGKVDAVAFGAK.F                     |                        |
|          |               |                                       |       |       |         | 3.1E-01 | R.DGIIPLFVEGAK.N                     |                        |
|          |               |                                       |       |       |         | 6.3E-06 | R.QSGPYAGTTIDTR.C                    |                        |
|          |               |                                       |       |       |         | 1.8E-07 | R.YDFEADQQR.E                        |                        |
|          |               |                                       |       |       |         | 1.0E-03 | R.LLAPSAIPIKDHR.I                    |                        |
|          |               |                                       |       |       |         | 3.1E-06 | R.TAVGYNDYPTYNK.-                    |                        |
|          |               |                                       |       |       |         | 4.2E-05 | K.ETYGVPEELTDDEVR.D                  |                        |
|          | EAN85497.1    | glutamamyl carboxypeptidase, putative | 44390 | 332   | 8       | 5.1E-04 | R.ALPNETVSK.M                        | 0                      |
|          |               |                                       |       |       |         | 1.1E-06 | K.LVAFDTTSR.N                        |                        |
|          |               |                                       |       |       |         | 2.5E-03 | R.EIAEEYRR.N                         |                        |
|          |               |                                       |       |       |         | 1.4E-02 | K.WSDPFTLTER.D                       |                        |
|          |               |                                       |       |       |         | 7.1E-05 | R.SYVETQLLPAMK.A + Oxidation (M)     |                        |
|          |               |                                       |       |       |         | 5.0E-04 | K.AEFEDAEIVITPR.D                    |                        |
|          |               |                                       |       |       |         | 5.1E-07 | R.DETPSFEGSEEAPFTK.L                 |                        |
|          |               |                                       |       |       |         | 6.0E-03 | K.GGIILSGHTDVVPVDGQK.W               |                        |
|          | EAN85498.1    | glutamamyl carboxypeptidase, putative | 44258 | 326   | 8       | 2.8E-06 | R.NETPSFEGSEEAPFTK.L                 | 0                      |
|          | EAN82710.1    | glutamamyl carboxypeptidase, putative | 44359 | 304   | 8       | 5.7E-04 | R.DETPSFEGSEEAPITK.L                 | 0                      |
|          |               | aspartate aminotransferase,           |       |       |         |         |                                      |                        |
|          | EAN86462.1    | mitochondrial, putative               | 46511 | 299   | 7       | 1.6E-03 | K.NFGLYGLR.C                         | 0                      |
|          |               |                                       |       |       |         | 6.9E-03 | K.SLEAMPER.S + Oxidation (M)         |                        |
|          |               |                                       |       |       |         | 3.6E-02 | K.GIDLPGMLK.S + Oxidation (M)        |                        |
|          |               |                                       |       |       |         | 1.0E-04 | K.VNLAVGVYR.D                        |                        |
|          |               |                                       |       |       |         | 9.7E-06 | R.TMYSNPPITGAR.I + Oxidation (M)     |                        |
|          |               |                                       |       |       |         | 1.4E-03 | R.QIGMMSYTGLTK.E + 2 Oxidation (M)   |                        |

| Spot no. | Accession no. | Protein Identity                                               | Mr    | SCORE | # PEPT. | Mascot  |                                   | Additional gene copies |
|----------|---------------|----------------------------------------------------------------|-------|-------|---------|---------|-----------------------------------|------------------------|
|          |               |                                                                |       |       |         | E-value | Sequence                          |                        |
| 12 cont. | EAN86462.1    | cont.                                                          |       |       |         | 3.5E-08 | R.AAISGLNSTNVSYVAK.A              |                        |
|          | EAN92220.1    | pyruvate dehydrogenase E1 component<br>alpha subunit, putative | 43381 | 130   | 4       | 8.1E-05 | K.SDIQDVR.K                       | 0                      |
|          |               |                                                                |       |       |         | 5.3E-03 | R.TTQGTVYAKP.-                    |                        |
|          |               |                                                                |       |       |         | 4.8E-02 | R.AAYQPEMYR.R + Oxidation (M)     |                        |
|          |               |                                                                |       |       |         | 1.2E-03 | K.EVDQQLQPAEK.Q                   |                        |
|          | EAN84558.1    | arginine kinase, putative                                      | 40528 | 123   | 3       | 2.0E-03 | K.EVFDQLK.G                       | 0                      |
|          |               |                                                                |       |       |         | 1.5E-06 | R.LVTAVGVIEEK.V                   |                        |
|          |               |                                                                |       |       |         | 5.5E-03 | R.VKGQLESMSGELR.G + Oxidation (M) |                        |
|          | EAN85848.1    | protein disulfide isomerase, putative                          | 29802 | 21    | 1       | 5.6E-02 | K.VGVNDELSK.V                     | 1                      |
| 13       | EAN88322.1    | hslvu complex proteolytic subunit-like,<br>putative            | 23080 | 215   | 4       | 4.0E-03 | R.QVTLGER.I                       | 1                      |
|          |               |                                                                |       |       |         | 3.0E-06 | R.KGDTVVLIGDR.Q                   |                        |
|          |               |                                                                |       |       |         | 3.3E-06 | K.VGEFPQQLTR.A                    |                        |
|          |               |                                                                |       |       |         | 5.4E-06 | K.LENKVGEFPQQLTR.A                |                        |
|          | EAN91467.1    | hypothetical protein, conserved                                | 28555 | 72    | 2       | 9.4E-02 | K.EVPREFAEK.A                     | 1                      |
|          |               |                                                                |       |       |         | 1.0E-05 | K.AIGELETELSSVR.H                 |                        |
|          | EAN86560.1    | cytochrome c oxidase subunit V, putative                       | 22450 | 59    | 2       | 8.2E-02 | R.DADVLRR.L                       | 1                      |
|          |               |                                                                |       |       |         | 8.8E-05 | R.SQYASTMDPR.D + Oxidation (M)    |                        |
|          | EAN84330.1    | mucin-associated surface protein<br>(MASP), putative           | 44673 | 27    | 1       | 7.3E-03 | K.VAISLPSR.M                      | 1                      |
|          | EAN82710.1    | glutamamyl carboxypeptidase, putative                          | 44359 | 27    | 1       | 6.8E-03 | R.ALPNETVSK.M                     | 4                      |
|          | EAN80947.1    | tryparedoxin peroxidase, putative                              | 22886 | 27    | 1       | 3.4E-03 | R.GLFIIDPK.Q                      | 5                      |
| 14       | EAN88322.1    | hslvu complex proteolytic subunit-like,<br>putative            | 23080 | 257   | 6       | 6.4E-03 | R.QVTLGER.I                       | 1                      |
|          |               |                                                                |       |       |         | 1.9E-02 | K.GDTVVLIGDR.Q                    |                        |
|          |               |                                                                |       |       |         | 6.8E-04 | R.AAVELAKDWR.T                    |                        |
|          |               |                                                                |       |       |         | 3.5E-06 | K.VGEFPQQLTR.A                    |                        |
|          |               |                                                                |       |       |         | 6.8E-05 | R.ALIDVDGYDAEK.I                  |                        |
|          |               |                                                                |       |       |         | 1.0E-05 | R.KPAKPADAPSEEK.K                 |                        |
|          | EAN86560.1    | cytochrome c oxidase subunit V, putative                       | 22450 | 153   | 4       | 2.3E-01 | R.DADVLRR.L                       | 1                      |
|          |               |                                                                |       |       |         | 1.1E-03 | R.IDEFKDGNK.V                     |                        |
|          |               |                                                                |       |       |         | 4.3E-06 | R.SQYASTMDPR.D + Oxidation (M)    |                        |
|          |               |                                                                |       |       |         | 3.0E-05 | R.GAASLLESLYR.G                   |                        |
|          | EAN91467.1    | hypothetical protein, conserved                                | 28555 | 91    | 2       | 6.7E-02 | K.EVPREFAEK.A                     | 1                      |
|          |               |                                                                |       |       |         | 2.4E-07 | K.AIGELETELSSVR.H                 |                        |

| Spot no. | Accession no. | Protein Identity                         | Mr     | SCORE | # PEPT. | Mascot                                 |                                  | Additional gene copies            |
|----------|---------------|------------------------------------------|--------|-------|---------|----------------------------------------|----------------------------------|-----------------------------------|
|          |               |                                          |        |       |         | E-value                                | Sequence                         |                                   |
| 14 cont. | EAN80947.1    | tryparedoxin peroxidase, putative        | 22886  | 69    | 2       | 4.6E-04                                | K.AFQFVEK.H                      | 3                                 |
|          |               |                                          |        |       |         | 2.5E-04                                | R.GLFIIDPK.Q                     |                                   |
|          | EAN98352.1    | pyruvate phosphate dikinase, putative    | 101833 | 51    | 3       | 1.9E-03                                | R.GTKFDTDLTAK.D                  | 1                                 |
|          |               |                                          |        |       |         | 2.7E-02                                | K.GLPQEVVEQVK.A                  |                                   |
|          |               |                                          |        |       | 2.7E+00 | R.IDPLQVDHLMHPNIEPGAAS + Oxidation (M) |                                  |                                   |
|          | EAN95114.1    | hypothetical protein, conserved          | 23669  | 50    | 1       | 1.7E-05                                | R.AGDSGISPLTTNVL.R               | 0                                 |
|          | EAN87271.1    | glycosomal membrane protein, putative    | 24137  | 27    | 1       | 9.8E-03                                | K.SVSSSITDGR.S                   | 1                                 |
| 15       | EAN86560.1    | cytochrome c oxidase subunit V, putative | 22450  | 392   | 12      | 7.1E-03                                | K.SLLETMK.W + Oxidation (M)      | 1                                 |
|          |               |                                          |        |       |         | 9.4E-03                                | R.DADVLRR.L                      |                                   |
|          |               |                                          |        |       |         | 4.5E-02                                | K.ENKTFIR.V                      |                                   |
|          |               |                                          |        |       |         | 3.1E-05                                | R.LGEVAKENK.T                    |                                   |
|          |               |                                          |        |       |         | 1.1E-02                                | R.IDEFKDGNK.V                    |                                   |
|          |               |                                          |        |       |         | 6.0E-03                                | R.SQYASTMDPR.D                   |                                   |
|          |               |                                          |        |       |         | 2.9E-05                                | R.SQYASTMDPR.D + Oxidation (M)   |                                   |
|          |               |                                          |        |       |         | 7.7E-08                                | R.GAASLLESYR.G                   |                                   |
|          |               |                                          |        |       |         | 4.5E-03                                | R.VFLPPLGDPHR.L                  |                                   |
|          |               |                                          |        |       |         | 7.0E-03                                | R.VRSQYASTMDPR.D + Oxidation (M) |                                   |
|          |               |                                          |        |       |         | 2.7E-04                                | K.VVIPHIELVEYLAK.S               |                                   |
|          |               |                                          |        |       |         | 2.0E-04                                | R.GADIPDHVFQTPAVIER.I            |                                   |
|          |               |                                          |        |       |         |                                        | EAN80947.1                       | tryparedoxin peroxidase, putative |
|          |               |                                          |        |       |         | 6.0E-03                                | K.AFQFVEK.H                      |                                   |
|          |               |                                          |        |       |         | 2.8E-04                                | R.GLFIIDPK.Q                     |                                   |
|          |               |                                          |        |       |         | 3.0E-04                                | R.QITVNDLPVGR.D                  |                                   |
|          | EAN98352.1    | pyruvate phosphate dikinase, putative    | 101833 | 59    | 2       | 3.3E-04                                | K.ATAEAWIR.R                     | 1                                 |
|          |               |                                          |        |       |         | 7.9E-02                                | R.FVYDSYRR.F                     |                                   |
|          | EAN81815.1    | co-chaperone GrpE, putative              | 24421  | 28    | 2       | 9.9E-02                                | R.IGRDDVEK.A                     | 0                                 |
|          |               |                                          |        |       |         | 4.3E-01                                | K.VSTEEIESNK.N                   |                                   |
|          | EAN82710.1    | glutamamyl carboxypeptidase, putative    | 44359  | 25    | 1       | 1.2E-02                                | R.ALPNETVSK.M                    | 4                                 |
| 16       | EAN82242.1    | co-chaperone GrpE, putative              | 24363  | 650   | 16      | 5.6E-04                                | K.LLLNNLAK.H                     | 0                                 |
|          |               |                                          |        |       |         | 1.9E-02                                | R.IGRDDVEK.A                     |                                   |
|          |               |                                          |        |       |         | 3.7E-02                                | R.SYGISSFGK.D                    |                                   |
|          |               |                                          |        |       |         | 1.7E-02                                | R.ENISELKK.E                     |                                   |
|          |               |                                          |        |       |         | 1.5E-03                                | R.APQVGVAGEGE.-                  |                                   |
|          |               |                                          |        |       |         | 6.1E-03                                | K.HGIEKLDVK.V                    |                                   |
|          |               |                                          |        |       |         | 2.0E-04                                | K.NLSSIHTGVK.L                   |                                   |
|          |               |                                          |        |       | 2.9E-06 | K.VSAEEIESNK.N                         |                                  |                                   |

| Spot no. | Accession no. | Protein Identity                         | Mr    | SCORE | # PEPT. | E-value | Mascot<br>Sequence                       | Additional gene copies |
|----------|---------------|------------------------------------------|-------|-------|---------|---------|------------------------------------------|------------------------|
| 16 cont. | EAN82242.1    | cont.                                    |       |       |         | 3.7E-05 | K.FDPNIHEALIK.T                          |                        |
|          |               |                                          |       |       |         | 4.1E-03 | K.DMLEVVDTLEK.G + Oxidation (M)          |                        |
|          |               |                                          |       |       |         | 1.9E-05 | R.ILRAPQVGVAGEGE.-                       |                        |
|          |               |                                          |       |       |         | 1.3E-08 | K.ATEGSQLKEETFAK.L                       |                        |
|          |               |                                          |       |       |         | 4.3E-04 | K.VGSKFDPNIHEALIK.T                      |                        |
|          |               |                                          |       |       |         | 2.7E-04 | K.TPASSEFPSGHISIVLK.V                    |                        |
|          |               |                                          |       |       |         | 4.2E-05 | K.VSAEEIESNKNLSSIHTGVK.L                 |                        |
|          |               |                                          |       |       |         | 5.5E-06 | R.SYGISSFGKDMLEVVDTLEK.G + Oxidation (M) |                        |
|          | EAN81815.1    | co-chaperone GrpE, putative              | 24421 | 624   | 16      | 1.8E-05 | K.VSTEEIESNK.N                           | 0                      |
|          |               |                                          |       |       |         | 2.0E-03 | K.VSTEEIESNKNLSSIHTGVK.L                 |                        |
|          | EAN80947.1    | tryparedoxin peroxidase, putative        | 22886 | 59    | 3       | 1.7E-02 | R.DVDEALR.L                              | 5                      |
|          |               |                                          |       |       |         | 3.9E-04 | R.GLFIIDPK.Q                             |                        |
|          |               |                                          |       |       |         | 1.4E+00 | R.QITVNDLPVGR.D                          |                        |
|          | EAN86560.1    | cytochrome c oxidase subunit V, putative | 22450 | 35    | 1       | 2.6E-04 | R.SQYASTMDPR.D + Oxidation               | 1                      |
| 17       | EAN81815.1    | co-chaperone GrpE, putative              | 24421 | 777   | 21      | 1.1E-01 | K.KEVLYR.A                               | 0                      |
|          |               |                                          |       |       |         | 2.2E-02 | K.LLLNNLAK.H                             |                        |
|          |               |                                          |       |       |         | 9.4E-03 | R.IGRDDVEK.A                             |                        |
|          |               |                                          |       |       |         | 3.8E-02 | R.SYGISSFGK.D                            |                        |
|          |               |                                          |       |       |         | 1.8E-02 | R.ENISELKK.E                             |                        |
|          |               |                                          |       |       |         | 3.9E-06 | R.APQVGVAGEGE.-                          |                        |
|          |               |                                          |       |       |         | 2.0E-03 | K.HGIEKLDVK.V                            |                        |
|          |               |                                          |       |       |         | 1.9E-04 | K.NLSSIHTGVK.L                           |                        |
|          |               |                                          |       |       |         | 1.8E-04 | K.LERELESAR.E                            |                        |
|          |               |                                          |       |       |         | 5.8E-03 | K.EETFAKLER.E                            |                        |
|          |               |                                          |       |       |         | 1.1E-06 | K.VSTEEIESNK.N                           |                        |
|          |               |                                          |       |       |         | 1.2E-05 | K.DMLEVVDTLEK.G                          |                        |
|          |               |                                          |       |       |         | 4.6E-02 | K.FDPNIHEALIK.T                          |                        |
|          |               |                                          |       |       |         | 3.2E-05 | K.DMLEVVDTLEK.G + Oxidation (M)          |                        |
|          |               |                                          |       |       |         | 2.2E-07 | R.ILRAPQVGVAGEGE.-                       |                        |
|          |               |                                          |       |       |         | 3.2E-03 | R.ELESARENISELK.K                        |                        |
|          |               |                                          |       |       |         | 1.9E-06 | K.ATEGSQLKEETFAK.L                       |                        |
|          |               |                                          |       |       |         | 2.2E-04 | K.VGSKFDPNIHEALIK.T                      |                        |
|          |               |                                          |       |       |         | 3.5E-05 | K.TPASSEFPSGHISIVLK.V                    |                        |
|          |               |                                          |       |       |         | 1.2E-04 | K.VSTEEIESNKNLSSIHTGVK.L                 |                        |
|          |               |                                          |       |       |         | 4.5E-04 | R.SYGISSFGKDMLEVVDTLEK.G + Oxidation     |                        |
|          | EAN82242.1    | co-chaperone GrpE, putative              | 24363 | 742   | 20      | 2.6E-07 | K.VSAEEIESNK.N                           | 0                      |
|          | EAN82317.1    | glutamamyl carboxypeptidase, putative    | 44248 | 46    | 1       | 6.8E-05 | K.LVAFDTSR.N                             | 5                      |

| Spot no.   | Accession no.                                                              | Protein Identity                                            | Mr     | SCORE | # PEPT. | E-value                            | Mascot                                      | Additional gene copies |
|------------|----------------------------------------------------------------------------|-------------------------------------------------------------|--------|-------|---------|------------------------------------|---------------------------------------------|------------------------|
|            |                                                                            |                                                             |        |       |         |                                    | Sequence                                    |                        |
| 17 cont.   | EAN94516.1                                                                 | hypothetical protein, conserved                             | 250837 | 17    | 1       | 8.1E-02                            | R.RQLTVDNNK.I                               | 0                      |
|            | EAN80947.1                                                                 | tryparedoxin peroxidase, putative                           | 22886  | 32    | 1       | 3.4E-04                            | R.GLFIDPK.Q                                 | 5                      |
|            | EAN86366.1                                                                 | trans-sialidase, putative                                   | 94015  | 23    | 1       | 3.6E-02                            | K.KENGNEK.G                                 | 1                      |
| 18         | EAN98352.1                                                                 | pyruvate phosphate dikinase, putative                       | 101833 | 438   | 11      | 4.4E-04                            | K.FDTDLTAK.D                                | 1                      |
|            |                                                                            |                                                             |        |       |         | 9.8E-05                            | K.ATAEAWIR.R                                |                        |
|            |                                                                            |                                                             |        |       |         | 5.6E-02                            | R.DMKELLGK.G + Oxidation (M)                |                        |
|            |                                                                            |                                                             |        |       |         | 7.8E-02                            | R.FVYDSYRR.F                                |                        |
|            |                                                                            |                                                             |        |       |         | 1.8E-05                            | R.GTKFDTDLTAK.D                             |                        |
|            |                                                                            |                                                             |        |       |         | 4.9E-04                            | K.TAEETLAAAGQR.V                            |                        |
|            |                                                                            |                                                             |        |       |         | 5.5E-06                            | K.GLPQEVVEQVK.A                             |                        |
|            |                                                                            |                                                             |        |       |         | 4.1E-04                            | K.KFVYFYGQK.A                               |                        |
|            |                                                                            |                                                             |        |       |         | 2.5E-05                            | R.TKGLPQEVVEQVK.A                           |                        |
|            |                                                                            |                                                             |        |       |         | 7.2E-05                            | R.SGAAASMPGMMDTVLNLGMNK.A + 4 Oxidation (M) |                        |
|            |                                                                            |                                                             |        |       |         | 6.4E-05                            | R.RVEADMGTNFGDVENPLLSVR.S + Oxidat          |                        |
| EAN85813.1 | dynein light chain, putative<br>mucin-associated surface protein           | 29682                                                       | 54     | 1     | 1.3E-05 | R.VVAAEEPR.V                       | 2                                           |                        |
|            |                                                                            |                                                             |        |       |         |                                    |                                             |                        |
| EAN87362.1 | (MASP), putative                                                           | 43226                                                       | 22     | 1     | 3.9E-02 | R.VTTVGEEAK.T                      | 0                                           |                        |
| EAN88441.1 | hypothetical protein, conserved<br>mucin-associated surface protein        | 47220                                                       | 19     | 1     | 3.9E-02 | R.ALLSLSPR.I                       | 1                                           |                        |
|            |                                                                            |                                                             |        |       |         |                                    |                                             |                        |
| EAN84330.1 | (MASP), putative                                                           | 44673                                                       | 18     | 1     | 6.1E-02 | K.VAISLPSR.M                       | 1                                           |                        |
| 19         | EAN97136.1                                                                 | ATP synthase, epsilon chain, putative                       | 20447  | 248   | 5       | 2.9E-03                            | K.AKAVIEIR.I                                | 0                      |
|            |                                                                            |                                                             |        |       |         | 2.1E-07                            | K.ALAAQQASLGSAK.D                           |                        |
|            |                                                                            |                                                             |        |       |         | 6.7E-09                            | K.ALAAQQASLGSAKDEK.A                        |                        |
|            |                                                                            |                                                             |        |       |         | 6.2E-04                            | K.VVDKDIHATHENLETLR.F                       |                        |
|            |                                                                            |                                                             |        |       |         | 5.2E-03                            | K.IVQLVPAPLTVFTDGTGTTK.Y                    |                        |
|            |                                                                            |                                                             |        |       |         |                                    |                                             |                        |
| EAN84330.1 | mucin-associated surface protein<br>(MASP), putative                       | 44673                                                       | 20     | 1     | 4.3E-02 | K.VAISLPSR.M                       | 1                                           |                        |
| 20         | EAN85671.1                                                                 | ribonucleoprotein p18, mitochondrial<br>precursor, putative | 27768  | 169   | 6       | 1.1E-03                            | R.IYEAPSK.Q                                 | 0                      |
|            |                                                                            |                                                             |        |       |         | 3.0E-03                            | K.VMEAEFK.S + Oxidation (M)                 |                        |
|            |                                                                            |                                                             |        |       |         | 5.9E-02                            | R.LGYCIQK.V                                 |                        |
|            |                                                                            |                                                             |        |       |         | 1.8E-01                            | K.SCPADLVK.Q                                |                        |
|            |                                                                            |                                                             |        |       |         | 1.5E-04                            | K.QAQPVENESK.F                              |                        |
|            |                                                                            |                                                             |        |       |         | 4.9E-04                            | R.IYEAPSKQAQPVENESK.F                       |                        |
|            |                                                                            |                                                             |        |       |         |                                    |                                             |                        |
| EAN86067.1 | succinyl-coA:3-ketoacid-coenzyme A<br>transferase, mitochondrial precursor | 53415                                                       | 137    | 2     | 5.5E-09 | K.GPGGAMDLVASGTR.V + Oxidation (M) | 1                                           |                        |
|            |                                                                            |                                                             |        |       | 6.0E-05 | K.EVAEGVTVEQVK.I                   |                                             |                        |
| EAN81053.1 | alpha tubulin, putative                                                    | 50549                                                       | 62     | 2     | 1.1E-02 | R.LSVDYGKK.S                       | 0                                           |                        |
|            |                                                                            |                                                             |        |       | 3.5E-04 | R.AVFLDLEPTVDEIR.T                 |                                             |                        |



| Spot no. | Accession no. | Protein Identity                                  | Mr    | SCORE | # PEPT. | E-value | Mascot Sequence                           | Additional gene copies |
|----------|---------------|---------------------------------------------------|-------|-------|---------|---------|-------------------------------------------|------------------------|
| 20 cont. | EAN86560.1    | cytochrome c oxidase subunit V, putative          | 22450 | 23    | 1       | 3.8E-03 | R.SQYASTMDPR.D + Oxidation                | 1                      |
|          | EAN82317.1    | glutamamyl carboxypeptidase, putative             | 44248 | 22    | 1       | 1.8E-02 | K.LVAFDTSR.N                              | 5                      |
|          | EAN84330.1    | mucin-associated surface protein (MASP), putative | 44673 | 20    | 1       | 3.6E-02 | K.VAISLPSR.M                              | 1                      |
| 21       | EAN85850.1    | 10 kDa heat shock protein, putative               | 10694 | 236   | 5       | 3.0E-02 | K.LQLPLGQR.V                              | 4                      |
|          |               |                                                   |       |       |         | 1.2E-03 | K.KLQLPLGQR.V                             |                        |
|          |               |                                                   |       |       |         | 2.8E-05 | K.AGVLIPEQVAGK.V                          |                        |
|          |               |                                                   |       |       |         | 2.1E-10 | K.VNEGTVVAVAAATK.D                        |                        |
|          |               |                                                   |       |       |         | 3.4E-04 | K.VDDTVLLPEFGSSVK.V                       |                        |
|          | EAN85055.1    | histone H4, putative                              | 11177 | 188   | 4       | 1.6E-02 | K.SFVEGVVR.D                              | 7                      |
|          |               |                                                   |       |       |         | 5.5E-06 | R.ISGHYDEVR.G                             |                        |
|          |               |                                                   |       |       |         | 5.5E-04 | R.DATAYTEYSR.K                            |                        |
|          |               |                                                   |       |       |         | 5.8E-07 | K.TVTAVDVVNALR.K                          |                        |
|          | EAN81533.1    | histone H4, putative                              | 11163 | 186   | 4       | 7.3E-06 | R.ISGVIYDEVR.G                            | 10                     |
|          | EAN87418.1    | heat shock protein-like protein, putative         | 36225 | 49    | 1       | 6.9E-06 | R.GIYDMYGEEGVR.H + Oxidation              | 1                      |
|          | EAO00025.1    | alcohol dehydrogenase, putative                   | 42442 | 37    | 1       | 4.9E-04 | K.VSYLGVGALDSATSK.M                       | 1                      |
|          | EAN84330.1    | mucin-associated surface protein (MASP), putative | 44673 | 18    | 1       | 6.7E-02 | K.VAISLPSR.M                              | 1                      |
| 22       | EAN82097.1    | hypothetical protein, conserved                   | 14352 | 247   | 6       | 2.9E-04 | K.LVSSTALR.T                              | 0                      |
|          |               |                                                   |       |       |         | 1.2E-02 | R.IMGPVKEQTIDK.L + Oxidation (M)          |                        |
|          |               |                                                   |       |       |         | 7.6E-05 | K.LNEVIPNATSTAR.S                         |                        |
|          |               |                                                   |       |       |         | 1.2E-04 | K.DYTETHVLFMKNK.L + Oxidation (M)         |                        |
|          |               |                                                   |       |       |         | 2.1E-07 | M.VQNLVINLLFNSPEIR.I                      |                        |
|          |               |                                                   |       |       |         | 4.5E-03 | R.TPVGQSSKDYTETHVLFMKNK.L + Oxidation (M) |                        |
|          | EAN97997.1    | hypothetical protein, conserved                   | 14334 | 242   | 6       | 1.4E-02 | R.TPAGQSSKDYTETHVLFMKNK.L + Oxidation     | 0                      |
|          | EAN85850.1    | 10 kDa heat shock protein, putative               | 10694 | 125   | 2       | 6.7E-04 | K.AGVLIPEQVAGK.V                          | 5                      |
|          |               |                                                   |       |       |         | 8.3E-10 | K.VNEGTVVAVAAATK.E                        |                        |
| 23       | EAN93009.1    | hypothetical protein, conserved                   | 13620 | 136   | 6       | 2.5E-02 | K.SIINKMR.N + Oxidation (M)               | 1                      |
|          |               |                                                   |       |       |         | 1.5E-02 | K.IRTPEER.Y                               |                        |
|          |               |                                                   |       |       |         | 1.5E-02 | K.AQMASLEEK.L + Oxidation (M)             |                        |
|          |               |                                                   |       |       |         | 2.8E-02 | K.HNEKIDAIK.A                             |                        |
|          |               |                                                   |       |       |         | 4.3E-02 | R.ELMKSIINK.M + Oxidation (M)             |                        |
|          |               |                                                   |       |       |         | 8.1E-03 | R.NEHDEKLGAAVAK.H                         |                        |
|          | EAN85850.1    | 10 kDa heat shock protein, putative               | 10694 | 34    | 1       | 2.9E-04 | K.AGVLIPEQVAGK.V                          | 5                      |
| 24       | EAN93009.1    | hypothetical protein, conserved                   | 13620 | 114   | 4       | 1.4E-02 | K.IRTPEER.Y                               | 1                      |
|          |               |                                                   |       |       |         | 2.2E-03 | K.AQMASLEEK.L + Oxidation (M)             |                        |
|          |               |                                                   |       |       |         | 9.2E-05 | K.HNEKIDAIK.A                             |                        |

| Spot no.   | Accession no.                   | Protein Identity                                  | Mr    | SCORE | # PEPT. | Mascot              |                                   | Additional gene copies |
|------------|---------------------------------|---------------------------------------------------|-------|-------|---------|---------------------|-----------------------------------|------------------------|
|            |                                 |                                                   |       |       |         | E-value             | Sequence                          |                        |
| 24 cont.   | EAN93009.1                      | cont.                                             |       |       |         | 1.5E-01             | R.ELMKSIINK.M + Oxidation (M)     |                        |
|            | EAN81211.1                      | cytochrome c oxidase subunit 10, putative         | 13942 | 38    | 1       | 5.6E-04             | R.INNNPTVGQFR.T                   | 3                      |
|            | EAN85850.1                      | 10 kDa heat shock protein, putative               | 10694 | 20    | 1       | 6.7E-03             | K.AGVLPEQVAGK.V                   | 5                      |
| 25         | EAN81211.1                      | cytochrome c oxidase subunit 10, putative         | 13942 | 158   | 5       | 5.7E-03             | R.NLFWGSDR.Q                      | 3                      |
|            |                                 |                                                   |       |       |         | 1.1E-04             | R.RNLFWGSDR.Q                     |                        |
|            |                                 |                                                   |       |       |         | 2.6E-05             | R.INNNPTVGQFR.T                   |                        |
|            |                                 |                                                   |       |       |         | 1.4E-02             | R.KWGFDDMSYMR.E + 2 Oxidation (M) |                        |
|            |                                 |                                                   |       |       |         | 2.4E-02             | R.NLFWGSDRQDFFR.H                 |                        |
|            | EAN89189.1                      | hypothetical protein, conserved                   | 11216 | 53    | 2       | 4.4E-02             | R.HFEVMK.L + Oxidation (M)        | 1                      |
|            | EAN84330.1                      | mucin-associated surface protein (MASP), putative | 44673 | 21    | 1       | 3.3E-02             | K.VAISLPSR.M                      | 1                      |
|            | EAN90963.1                      | hypothetical protein, conserved                   | 81004 | 18    | 1       | 4.5E-02             | K.TAEHSALRPASVAEADVMLR.V + Oxidat | 0                      |
| EAN98338.1 | hypothetical protein, conserved | 156352                                            | 17    | 1     | 9.3E-02 | R.AEVRNTDLK.S       | 0                                 |                        |
| 26         | EAN85850.1                      | 10 kDa heat shock protein, putative               | 10694 | 290   | 6       | 1.5E-02             | K.LQPLGQR.V                       | 4                      |
|            |                                 |                                                   |       |       |         | 5.9E-03             | K.DWTPTVK.V                       |                        |
|            |                                 |                                                   |       |       |         | 4.6E-04             | K.KLQPLGQR.V                      |                        |
|            |                                 |                                                   |       |       |         | 4.6E-06             | K.AGVLPEQVAGK.V                   |                        |
|            |                                 |                                                   |       |       |         | 4.4E-11             | K.VNEGTVVAVAAATK.D                |                        |
|            |                                 |                                                   |       |       |         | 8.0E-05             | K.VDDTVLLPEFGGSSVK.V              |                        |
|            | EAN85055.1                      | histone H4, putative                              | 11177 | 213   | 5       | 5.7E-03             | K.SFVEGVVR.D                      | 6                      |
|            |                                 |                                                   |       |       |         | 8.5E-03             | K.ILRENV.R.G                      |                        |
|            |                                 |                                                   |       |       |         | 5.6E-06             | R.ISGHIYDEVR.G                    |                        |
|            |                                 |                                                   |       |       |         | 4.0E-05             | R.DATAYTEYSR.K                    |                        |
|            | EAN81533.1                      | histone H4, putative                              | 11163 | 207   | 5       | 2.8E-05             | R.ISGVIYDEVR.G                    | 10                     |
|            | EAN81211.1                      | cytochrome c oxidase subunit 10, putative         | 13942 | 48    | 1       | 4.3E-05             | R.INNNPTVGQFR.T                   | 3                      |
|            |                                 |                                                   |       |       |         |                     |                                   |                        |
| EAN82295.1 | hypothetical protein, conserved | 13703                                             | 22    | 1     | 8.4E-03 | R.TTDSHESDNGKDITR.L | 1                                 |                        |
| EAN88441.1 | hypothetical protein, conserved | 47220                                             | 19    | 1     | 3.6E-02 | R.ALLSLSPR.I        | 1                                 |                        |
| 27         | EAN85850.1                      | 10 kDa heat shock protein, putative               | 10694 | 170   | 3       | 1.8E-05             | K.AGVLPEQVAGK.V                   | 4                      |
|            |                                 |                                                   |       |       |         | 4.4E-09             | K.VNEGTVVAVAAATK.D                |                        |
|            |                                 |                                                   |       |       |         | 9.0E-04             | K.VDDTVLLPEFGGSSVK.V              |                        |

| Spot no. | Accession no. | Protein Identity                             | Mr    | SCORE | # PEPT. | E-value    | Mascot<br>Sequence                                              | Additional gene copies |       |     |   |         |                                     |   |
|----------|---------------|----------------------------------------------|-------|-------|---------|------------|-----------------------------------------------------------------|------------------------|-------|-----|---|---------|-------------------------------------|---|
| 27 cont. | EAN89655.1    | cytochrome C oxidase subunit VI,<br>putative | 19230 | 139   | 4       | 7.0E-03    | R.FSYTANK.Q                                                     | 0                      |       |     |   |         |                                     |   |
|          |               |                                              |       |       |         | 6.8E-05    | R.FSYTANKQK.N                                                   |                        |       |     |   |         |                                     |   |
|          |               |                                              |       |       |         | 2.2E-06    | K.APILHDVVFVNGK.K                                               |                        |       |     |   |         |                                     |   |
|          |               |                                              |       |       |         | 4.2E-02    | R.EEMPAVPHFSDFDSDPR.F + Oxidation                               |                        |       |     |   |         |                                     |   |
|          | EAN85330.1    | histone H2A, putative                        | 14385 | 33    | 2       | 1.0E-01    | R.GGVMPSLNK.A + Oxidation                                       | 13                     |       |     |   |         |                                     |   |
|          |               |                                              |       |       |         | 4.5E-02    | K.AGLIFPVGR.V                                                   |                        |       |     |   |         |                                     |   |
| 28       | EAN89116.1    | heat shock protein 20, putative              | 16000 | 269   | 7       | 7.0E-05    | R.SGISVKIN.-                                                    | 0                      |       |     |   |         |                                     |   |
|          |               |                                              |       |       |         | 1.6E-02    | K.NVVMAER.G + Oxidation (M)                                     |                        |       |     |   |         |                                     |   |
|          |               |                                              |       |       |         | 1.3E-04    | K.ILADLPGMNR.N + Oxidation (M)                                  |                        |       |     |   |         |                                     |   |
|          |               |                                              |       |       |         | 1.3E-02    | R.DSVLLVEVKK.V                                                  |                        |       |     |   |         |                                     |   |
|          |               |                                              |       |       |         | 1.0E-04    | R.LPSPLEEGSVK.A                                                 |                        |       |     |   |         |                                     |   |
|          |               |                                              |       |       |         | 3.3E-07    | R.MQSVTGTSFLSTSAR.G + Oxidation (M)                             |                        |       |     |   |         |                                     |   |
|          |               |                                              |       |       |         | 2.3E-02    | K.SMLSEEEHKNVVMAER.G + 2 Oxidation                              |                        |       |     |   |         |                                     |   |
|          |               |                                              |       |       |         | EAO00223.1 | heat shock protein 20, putative                                 |                        | 15973 | 266 | 7 | 3.5E-04 | K.ILADLPGMSR.N + Oxidation          | 0 |
|          |               |                                              |       |       |         | EAN85850.1 | 10 kDa heat shock protein, putative                             |                        | 10694 | 75  | 2 | 9.2E-05 | K.AGVLIPEQVAGK.V                    | 5 |
|          |               |                                              |       |       |         |            |                                                                 |                        |       |     |   | 5.8E-04 | K.VNEGTVVAVAAATK.D                  |   |
|          | EAN81492.1    | 40S ribosomal protein S14, putative          | 15771 | 55    | 1       | 5.0E-06    | R.SPGPGAQAALR.A                                                 | 2                      |       |     |   |         |                                     |   |
|          | EAN83533.1    | histone H2B, putative                        | 12353 | 29    | 1       | 6.0E-03    | R.IASEAATVVR.V                                                  | 1                      |       |     |   |         |                                     |   |
| 29       | EAN85850.1    | 10 kDa heat shock protein, putative          | 10694 | 84    | 3       | 8.5E-03    | K.LQPLGQR.V                                                     | 5                      |       |     |   |         |                                     |   |
|          |               |                                              |       |       |         | 3.9E-04    | K.AGVLIPEQVAGK.V                                                |                        |       |     |   |         |                                     |   |
|          |               |                                              |       |       |         | 3.1E-03    | K.VNEGTVVAVAAATK.D                                              |                        |       |     |   |         |                                     |   |
|          |               |                                              |       |       |         | EAN81916.1 | ATP synthase, alpha chain,<br>mitochondrial precursor, putative |                        | 25912 | 30  | 1 | 5.4E-04 | K.VMATGQLLHIPVGAGVLGK.V + Oxidation | 0 |
|          |               |                                              |       |       |         | EAN84330.1 | mucin-associated surface protein<br>(MASP), putative            |                        | 44673 | 23  | 1 | 1.8E-02 | K.VAISLPSR.M                        | 1 |

**TABLE S5 (SPOTS 30-34): COMPLETE PEPTIDE LIST**

|            |                                                            |                                              |       |       |         |                                | Mascot                     | Additional gene<br>copies under same<br>match |                                  |
|------------|------------------------------------------------------------|----------------------------------------------|-------|-------|---------|--------------------------------|----------------------------|-----------------------------------------------|----------------------------------|
| Spot no.   | Accession no.                                              | Protein Identity                             | Mr    | SCORE | # PEPT. | E-value                        | Sequence                   |                                               |                                  |
| Spot 30    | EAN85498.1                                                 | gamma-glutamyl carboxypeptidase,<br>putative | 44258 | 714   | 20      | 3.5E-03                        | K.MMQQVR.S + Oxidation (M) | 0                                             |                                  |
|            |                                                            |                                              |       |       |         |                                | 6.6E-03                    |                                               | R.EIAEEYR.R                      |
|            |                                                            |                                              |       |       |         |                                | 3.2E-03                    |                                               | K.GGSHFWVR.V                     |
|            |                                                            |                                              |       |       |         |                                | 9.4E-04                    |                                               | R.ALPNETVSK.M                    |
|            |                                                            |                                              |       |       |         |                                | 3.5E-03                    |                                               | K.DYLEGLGVK.C                    |
|            |                                                            |                                              |       |       |         |                                | 2.2E-05                    |                                               | K.LVAFDTTSR.N                    |
|            |                                                            |                                              |       |       |         |                                | 4.6E-03                    |                                               | R.EIAEEYRR.N                     |
|            |                                                            |                                              |       |       |         |                                | 2.6E-04                    |                                               | K.LREIAEEYR.R                    |
|            |                                                            |                                              |       |       |         |                                | 1.1E-03                    |                                               | R.SMDHTQWLAK.L                   |
|            |                                                            |                                              |       |       |         |                                | 1.6E-03                    |                                               | R.SMDHTQWLAK.L + Oxidation (M)   |
|            |                                                            |                                              |       |       |         |                                | 1.7E-05                    |                                               | K.WSDPFLTER.D                    |
|            |                                                            |                                              |       |       |         |                                | 3.0E-05                    |                                               | R.SYVETQLLPAMK.A                 |
|            |                                                            |                                              |       |       |         |                                | 1.9E-04                    |                                               | R.SYVETQLLPAMK.A + Oxidation (M) |
|            |                                                            |                                              |       |       |         |                                | 2.8E-04                    |                                               | K.AEFEDAEIVITPR.N                |
|            |                                                            |                                              |       |       |         |                                | 2.2E-05                    |                                               | K.ANLWATLPGDGGVTK.G              |
| 2.0E-02    | R.NKANLWATLPGDGGVTK.G                                      |                                              |       |       |         |                                |                            |                                               |                                  |
| 7.6E-08    | R.NETPSFEGSEEAPFTK.L                                       |                                              |       |       |         |                                |                            |                                               |                                  |
| 3.7E-06    | K.GGIILSGHTDVVPVDGQK.W                                     |                                              |       |       |         |                                |                            |                                               |                                  |
| 1.7E-02    | K.AAHSSLALTGESCNAIDYATK.L                                  |                                              |       |       |         |                                |                            |                                               |                                  |
| 3.1E-04    | R.SYVETQLLPAMKAEFEDAEIVITPR.N + Oxidation (M)              |                                              |       |       |         |                                |                            |                                               |                                  |
| EAN85497.1 | gamma-glutamyl carboxypeptidase,<br>putative               | 44390                                        | 707   | 20    | 2.3E-04 | K.GTSHFWVR.V                   | 0                          |                                               |                                  |
|            |                                                            |                                              |       |       | 4.3E-06 | R.DETPSFEGSEEAPFTK.L           |                            |                                               |                                  |
| EAN82710.1 | gamma-glutamyl carboxypeptidase,<br>putative               | 44359                                        | 701   | 20    | 5.2E-05 | R.DETPSFEGSEEAPITK.L           | 0                          |                                               |                                  |
| EAN82318.1 | gamma-glutamyl carboxypeptidase,<br>putative               | 44366                                        | 645   | 18    | 8.7E-06 | R.NETPSFEGSEEAPLTK.L           | 0                          |                                               |                                  |
| EAN96732.1 | succinyl-CoA ligase [GDP-forming] beta-<br>chain, putative | 46089                                        | 441   | 9     | 3.8E-02 | K.SQILAGGR.G                   | 0                          |                                               |                                  |
|            |                                                            |                                              |       |       | 8.7E-07 | R.AAENAAEQVK.A                 |                            |                                               |                                  |
|            |                                                            |                                              |       |       | 1.2E-03 | R.GMGTFEDGFK.G + Oxidation (M) |                            |                                               |                                  |
|            |                                                            |                                              |       |       | 1.3E-05 | R.TLEEVEAALGK.I                |                            |                                               |                                  |
|            |                                                            |                                              |       |       | 1.7E-06 | K.LSFDDNAEFR.Q                 |                            |                                               |                                  |
|            |                                                            |                                              |       |       | 4.7E-06 | R.ILQESGLPLHPAR.N              |                            |                                               |                                  |

| Spot no. | Accession no. | Protein Identity                          | Mr    | SCORE | # PEPT. | E-value | Mascot<br>Sequence                   | Additional copies |
|----------|---------------|-------------------------------------------|-------|-------|---------|---------|--------------------------------------|-------------------|
| 30 cont. | EAN96732.1    | cont.                                     |       |       |         | 8.9E-08 | R.VNLLYVTEAVTGIK.R                   |                   |
|          |               |                                           |       |       |         | 2.9E-02 | K.DIFSLADDTQIDPK.E                   |                   |
|          |               |                                           |       |       |         | 1.9E-06 | K.EQIVAAFQITGDEK.V                   |                   |
|          | EAN97657.1    | chaperonin HSP60, mitochondrial precursor | 59413 | 398   | 6       | 8.0E-05 | R.AVSAVATTLGPK.G                     | 0                 |
|          |               |                                           |       |       |         | 9.0E-08 | K.VGGGSEVEVNEK.K                     |                   |
|          |               |                                           |       |       |         | 1.1E-06 | R.NVIIEQSYGAPK.I                     |                   |
|          |               |                                           |       |       |         | 2.5E-07 | K.AELEDAFVLVSAK.K                    |                   |
|          |               |                                           |       |       |         | 3.7E-08 | R.AVGVILQSVAEQSR.K                   |                   |
|          |               |                                           |       |       |         | 8.4E-07 | K.TAMMQDIAIFAGAR.L + 2 Oxidation (M) |                   |
|          | EAN81053.1    | alpha tubulin, putative                   | 50549 | 389   | 7       | 7.1E-03 | R.LSVDYGKK.S                         | 0                 |
|          |               |                                           |       |       |         | 2.1E-05 | K.DVNAAVATIK.T                       |                   |
|          |               |                                           |       |       |         | 1.5E-08 | R.LIGQVVSALTASLR.F                   |                   |
|          |               |                                           |       |       |         | 4.6E-06 | R.TIQFVDWSPTGFK.C                    |                   |
|          |               |                                           |       |       |         | 1.6E-08 | R.AVFLDLEPTVVDEIR.T                  |                   |
|          |               |                                           |       |       |         | 3.8E-03 | R.NLDIERPTYTNLNR.L                   |                   |
|          |               |                                           |       |       |         | 5.4E-07 | R.IHFVLTSYAPVISAEL.A                 |                   |
|          | EAN98272.1    | eukaryotic initiation factor 4a, putative | 49984 | 369   | 7       | 1.5E-03 | R.ESLTLEGIK.Q                        | 1                 |
|          |               |                                           |       |       |         | 2.0E-03 | K.GVAINFVTQK.D                       |                   |
|          |               |                                           |       |       |         | 2.6E-05 | R.VLVTTDLVAR.G                       |                   |
|          |               |                                           |       |       |         | 3.1E-06 | K.TGAFSIGLLQR.L                      |                   |
|          |               |                                           |       |       |         | 7.0E-08 | R.GGDIIAQAQSGTGK.T                   |                   |
|          |               |                                           |       |       |         | 2.0E-05 | K.LQAGSIVAVGTPGR.V                   |                   |
|          |               |                                           |       |       |         | 1.6E-07 | R.ELALQTAEVITRI                      |                   |
|          | EAN94839.1    | beta tubulin, putative                    | 50520 | 352   | 10      | 2.3E-01 | R.YLTASALFR.G                        | 0                 |
|          |               |                                           |       |       |         | 5.4E-05 | K.LAVNLVPPFR.L                       |                   |
|          |               |                                           |       |       |         | 2.9E-06 | R.VGEQFTAMFR.R + Oxidation (M)       |                   |
|          |               |                                           |       |       |         | 2.6E-07 | R.INVYFDEATGGR.Y                     |                   |
|          |               |                                           |       |       |         | 1.3E-01 | R.IMMTFSIIPSPK.V + 2 Oxidation (M)   |                   |
|          |               |                                           |       |       |         | 5.4E-06 | K.EVDEQMLNVQNK.N                     |                   |
|          |               |                                           |       |       |         | 1.1E-05 | K.EVDEQMLNVQNK.N + Oxidation (M)     |                   |
|          |               |                                           |       |       |         | 3.6E-04 | R.AVLIDLEPGTMDSVR.A + Oxidation (M)  |                   |
|          |               |                                           |       |       |         | 2.6E-04 | R.GLSVPELTQQMFDK.N + Oxidation (M)   |                   |
|          |               |                                           |       |       |         | 3.6E-02 | K.NSSYFIEWIPNNIK.S                   |                   |
|          | EAN95952.1    | hypothetical protein, conserved           | 43691 | 331   | 6       | 1.6E-05 | K.VIANLLNR.-                         | 0                 |
|          |               |                                           |       |       |         | 1.3E-06 | R.FVFTAVLPR.F                        |                   |
|          |               |                                           |       |       |         | 6.8E-03 | R.LIFLYPMSK.L + Oxidation (M)        |                   |
|          |               |                                           |       |       |         | 1.4E-06 | K.IINLSAEEIR.A                       |                   |
|          |               |                                           |       |       |         | 2.9E-06 | R.VIYLNLNNEEPR.T                     |                   |

| Spot no. | Accession no. | Protein Identity                                            | Mr     | SCORE | # PEPT. | E-value | Mascot<br>Sequence                 | Additional copies |
|----------|---------------|-------------------------------------------------------------|--------|-------|---------|---------|------------------------------------|-------------------|
| 30 cont. | EAN95952.1    | cont.                                                       |        |       |         | 2.0E-07 | K.SEEPSGLELVDLR.D                  |                   |
|          | EAN86150.1    | hypothetical protein, conserved                             | 47419  | 231   | 8       | 1.7E-02 | R.QLNYGPK.D                        | 0                 |
|          |               |                                                             |        |       |         | 1.1E-02 | R.FLAPYDK.N                        |                   |
|          |               |                                                             |        |       |         | 1.1E-03 | R.AWDDLFEK.N                       |                   |
|          |               |                                                             |        |       |         | 1.8E-03 | K.EVSQEEIAK.L                      |                   |
|          |               |                                                             |        |       |         | 1.8E-04 | R.SIPSYLTDTK.W                     |                   |
|          |               |                                                             |        |       |         | 2.8E-02 | R.NFFPGLALFAK.Q                    |                   |
|          |               |                                                             |        |       |         | 2.7E-01 | R.HAADMYDGFIFK.F + Oxidation (M)   |                   |
|          |               |                                                             |        |       |         | 2.6E-05 | K.QTQEAVDIWLR.I                    |                   |
|          | EAN96060.1    | gamma-glutamyl carboxypeptidase, putative                   | 44531  | 210   | 5       | 3.5E-03 | K.DYLEGLGVK.C not unique           | 0                 |
|          |               |                                                             |        |       |         | 1.1E-04 | K.LVSFDTTSR.N                      |                   |
|          |               |                                                             |        |       |         | 5.1E-03 | K.INEIAENIK.F                      |                   |
|          |               |                                                             |        |       |         | 1.4E-05 | K.AYVNDTLLPSMK.K + Oxidation (M)   |                   |
|          |               |                                                             |        |       |         | 1.3E-05 | R.YLPEAEAEKFEER.I                  |                   |
|          | EAN98352.1    | pyruvate phosphate dikinase, putative                       | 101833 | 196   | 4       | 1.1E-05 | K.TAEETLAAAGQR.V                   | 1                 |
|          |               |                                                             |        |       |         | 1.0E-04 | K.GLPQEVVEQVK.A                    |                   |
|          |               |                                                             |        |       |         | 2.0E-04 | R.EMILADTLEGR.K + Oxidation (M)    |                   |
|          |               |                                                             |        |       |         | 6.9E-06 | R.TPQQIGQSLSLR.W                   |                   |
|          | EAN92220.1    | pyruvate dehydrogenase E1 component alpha subunit, putative | 43381  | 147   | 4       | 1.1E-04 | K.SDIQDVR.K                        | 0                 |
|          |               |                                                             |        |       |         | 1.6E-02 | R.AAYQPEMYR.R + Oxidation (M)      |                   |
|          |               |                                                             |        |       |         | 3.0E-05 | K.GPIVLEFDSYR.Y                    |                   |
|          |               |                                                             |        |       |         | 4.1E-03 | R.GGTPGEVFAEMFGK.E + Oxidation (M) |                   |
|          | EAN83160.1    | phosphomannose isomerase, putative                          | 46214  | 141   | 4       | 1.9E-02 | K.VAAESFVAK.M                      | 0                 |
|          |               |                                                             |        |       |         | 3.1E-03 | R.FTEFSLYR.M                       |                   |
|          |               |                                                             |        |       |         | 2.8E-05 | K.TLLGNVAVVSAK.E                   |                   |
|          |               |                                                             |        |       |         | 2.9E-04 | R.AAEGEAWEVQR.Y                    |                   |
|          | EAN98440.1    | actin-like protein, putative                                | 47418  | 136   | 3       | 1.4E-04 | K.EVQTPLLLTEK.M                    | 0                 |
|          |               |                                                             |        |       |         | 5.8E-05 | R.QAAIVDIGSYTTR.I                  |                   |
|          |               |                                                             |        |       |         | 6.1E-05 | K.LDYEESGPSAVLR.R                  |                   |
|          | EAN85395.1    | 3-ketoacyl-CoA thiolase, putative                           | 46802  | 130   | 2       | 3.3E-05 | K.MGISPNDSLVK.S + Oxidation (M)    | 1                 |
|          |               |                                                             |        |       |         | 2.9E-08 | K.SLAAASGNLYEDPPDTR.M              |                   |
|          | EAN86097.1    | fructose-bisphosphate aldolase, glycosomal, putative        | 41279  | 103   | 2       | 9.1E-07 | R.VEVLQTQLPAYNR.L                  | 2                 |
|          |               |                                                             |        |       |         | 3.6E-04 | R.ATPGQVAQYTVSTLAR.V               |                   |
|          | EAN81757.1    | mitochondrial processing peptidase, beta subunit, putative  | 31341  | 87    | 1       | 6.3E-09 | R.AAASNFGDLVAASK.S                 | 1                 |
|          | EAN92798.1    | phosphomannose isomerase, putative                          | 46092  | 87    | 3       | 1.9E-02 | K.VAAESFVAK.M not unique           | 0                 |
|          |               |                                                             |        |       |         | 3.1E-03 | R.FTEFSLYR.L not unique            |                   |

| Spot no. | Accession no. | Protein Identity                                          | Mr    | SCORE | # PEPT. | E-value                                                                                                                                                                                                       | Mascot<br>Sequence                                                                                                                                                                                                                                                                                                                                                                                                     | Additional copies |
|----------|---------------|-----------------------------------------------------------|-------|-------|---------|---------------------------------------------------------------------------------------------------------------------------------------------------------------------------------------------------------------|------------------------------------------------------------------------------------------------------------------------------------------------------------------------------------------------------------------------------------------------------------------------------------------------------------------------------------------------------------------------------------------------------------------------|-------------------|
| 30 cont. | EAN92798.1    | cont.                                                     |       |       |         | 8.3E-04                                                                                                                                                                                                       | K.TLLGNTAVVSAK.E                                                                                                                                                                                                                                                                                                                                                                                                       |                   |
|          | EAN82857.1    | elongation factor 1-alpha (EF-1-alpha),<br>putative       | 48884 | 86    | 2       | 2.8E-03<br>8.0E-06                                                                                                                                                                                            | K.SVNFAQER.Y<br>K.IGGIGTVPVGR.V                                                                                                                                                                                                                                                                                                                                                                                        | 5                 |
|          | EAN88964.1    | glycosomal phosphoenolpyruvate<br>carboxykinase, putative | 59404 | 74    | 2       | 1.8E-03<br>1.9E-04                                                                                                                                                                                            | K.TTLSADPHR.N<br>K.TEKDIYDAVR.F                                                                                                                                                                                                                                                                                                                                                                                        | 1                 |
|          | EAN85276.1    | hypothetical protein                                      | 52756 | 60    | 1       | 1.7E-06                                                                                                                                                                                                       | R.FADANEENVPAQVNR.V                                                                                                                                                                                                                                                                                                                                                                                                    | 1                 |
|          | EAN87042.1    | SPFH domain / Band 7 family protein,<br>putative          | 44380 | 54    | 1       | 1.3E-05                                                                                                                                                                                                       | R.AEAEAEATGVMAAAISK.S + Oxidation                                                                                                                                                                                                                                                                                                                                                                                      | 1                 |
|          | EAN92318.1    | 69 kDa paraflagellar rod protein, putative                | 70087 | 53    | 1       | 1.2E-05                                                                                                                                                                                                       | R.TVSFTGTIDNAIAK.L                                                                                                                                                                                                                                                                                                                                                                                                     | 0                 |
|          | EAO00025.1    | alcohol dehydrogenase, putative                           | 42442 | 53    | 1       | 1.3E-05                                                                                                                                                                                                       | K.VSYLGVGALDSATSK.M                                                                                                                                                                                                                                                                                                                                                                                                    | 1                 |
|          | EAO00026.1    | elongation factor TU, putative                            | 52462 | 40    | 1       | 2.5E-04                                                                                                                                                                                                       | K.IVGSGETVNLSEK.E                                                                                                                                                                                                                                                                                                                                                                                                      | 1                 |
|          | EAN87141.1    | hexokinase, putative                                      | 52750 | 29    | 1       | 5.1E-03                                                                                                                                                                                                       | R.ATVAIDGSVFEK.T                                                                                                                                                                                                                                                                                                                                                                                                       | 1                 |
|          | EAN83852.1    | heat shock 70 kDa protein, putative                       | 41044 | 28    | 1       | 5.7E-03                                                                                                                                                                                                       | R.VEIIANDQGNR.T                                                                                                                                                                                                                                                                                                                                                                                                        | 1                 |
|          | EAN95757.1    | prostaglandin F2alpha synthase                            | 14719 | 26    | 1       | 1.2E-02                                                                                                                                                                                                       | K.FIANPDLVER.A                                                                                                                                                                                                                                                                                                                                                                                                         | 1                 |
|          | EAN86294.1    | phosphoglycerate kinase, putative                         | 44867 | 19    | 1       | 3.2E-02                                                                                                                                                                                                       | K.TLPGVAVLDDKE.-                                                                                                                                                                                                                                                                                                                                                                                                       | 3                 |
|          | EAN85233.1    | axoneme central apparatus protein,<br>putative            | 34377 | 19    | 1       | 5.2E-02                                                                                                                                                                                                       | R.TAASTLSDIK.H                                                                                                                                                                                                                                                                                                                                                                                                         | 1                 |
| Spot 31  | EAN85497.1    | gamma-glutamyl carboxypeptidase,<br>putative              | 44390 | 778   | 21      | 2.7E-02<br>3.7E-03<br>7.7E-04<br>8.4E-04<br>2.6E-03<br>7.1E-05<br>4.6E-03<br>1.8E-04<br>1.8E-04<br>2.1E-03<br>1.5E-05<br>1.5E-06<br>1.4E-02<br>2.6E-04<br>1.4E-04<br>1.1E-02<br>1.7E-06<br>4.0E-08<br>4.1E-05 | K.MMQQVR.S + Oxidation (M)<br>R.EIAEEYR.R<br>R.ALPNETVSK.M<br>K.GTSHFWVR.V<br>K.DYLEGLGVK.C<br>K.LVAFDTSR.N<br>R.EIAEEYRR.N<br>K.LREIAEEYR.R<br>R.SMDHTQWLAK.L<br>R.SMDHTQWLAK.L + Oxidation (M)<br>K.WSDPFTLTER.D<br>R.SYVETQLLPAMK.A<br>R.SYVETQLLPAMK.A + Oxidation (M)<br>K.AEFEDAEIVITPR.D<br>K.ANLWATLPGDGGVTK.G<br>K.WSDPFTLTERDGK.L<br>R.NKANLWATLPGDGGVTK.G<br>R.DETPSFEGSEEAPFTK.L<br>K.GGIILSGHTDVVPVDGQK.W | 0                 |

| Spot no. | Accession no. | Protein Identity                                          | Mr     | SCORE | # PEPT. | E-value | Mascot<br>Sequence                     | Additional copies |
|----------|---------------|-----------------------------------------------------------|--------|-------|---------|---------|----------------------------------------|-------------------|
| 31 cont. | EAN85497.1    | cont.                                                     |        |       |         | 7.7E-03 | K.AAHSSLALTGESCNAIDYATK.L              |                   |
|          |               |                                                           |        |       |         | 2.8E-03 | R.SYVETQLLPAMKAEFEDAEIVITPR.D + Oxidat |                   |
|          | EAN82710.1    | gamma-glutamyl carboxypeptidase,<br>putative              | 44359  | 750   | 21      | 5.3E-05 | R.DETPSFEGSEEAPITK.L                   | 0                 |
|          | EAN85498.1    | gamma-glutamyl carboxypeptidase,<br>putative              | 44258  | 748   | 21      | 3.1E-03 | K.GGSHFWVR.V                           | 0                 |
|          |               |                                                           |        |       |         | 1.1E-05 | R.NETPSFEGSEEAPFTK.L                   |                   |
|          | EAN82318.1    | gamma-glutamyl carboxypeptidase,<br>putative              | 44366  | 701   | 19      | 7.8E-06 | R.NETPSFEGSEEAPLTK.L                   | 0                 |
|          | EAN98272.1    | eukaryotic initiation factor 4a, putative                 | 49984  | 374   | 7       | 5.4E-04 | R.ESLTLEGIK.Q                          | 1                 |
|          |               |                                                           |        |       |         | 3.8E-05 | R.VLVTTDLVAR.G                         |                   |
|          |               |                                                           |        |       |         | 1.2E-06 | K.TGAFSIGLLQR.L                        |                   |
|          |               |                                                           |        |       |         | 4.7E-04 | R.KGVAINFVTQK.D                        |                   |
|          |               |                                                           |        |       |         | 2.1E-06 | R.GGDIIAQAQSGTGK.T                     |                   |
|          |               |                                                           |        |       |         | 2.2E-06 | K.LQAGSIVAVGTPGR.V                     |                   |
|          |               |                                                           |        |       |         | 1.5E-07 | R.ELALQTAEVITR.I                       |                   |
|          | EAN96060.1    | gamma-glutamyl carboxypeptidase,<br>putative              | 44531  | 248   | 6       | 2.6E-03 | K.DYLEGLGVK.C not unique               | 0                 |
|          |               |                                                           |        |       |         | 2.2E-05 | K.LVSFDTTSR.N                          |                   |
|          |               |                                                           |        |       |         | 4.3E-03 | K.INEIAENIK.F                          |                   |
|          |               |                                                           |        |       |         | 1.5E-04 | K.AYVNDTLLPSMK.K                       |                   |
|          |               |                                                           |        |       |         | 1.4E-05 | K.AYVNDTLLPSMK.K + Oxidation (M)       |                   |
|          |               |                                                           |        |       |         | 1.9E-02 | K.AYVNDTLLPSMKK.A + Oxidation (M)      |                   |
|          |               |                                                           |        |       |         | 2.3E-06 | R.YLPEAEAEKFEER.I                      |                   |
|          | EAN98352.1    | pyruvate phosphate dikinase, putative                     | 101833 | 247   | 5       | 1.5E-04 | R.SATGVAFSR.S                          | 1                 |
|          |               |                                                           |        |       |         | 6.7E-06 | K.TAEETLAAAGQR.V                       |                   |
|          |               |                                                           |        |       |         | 4.8E-03 | K.GLPQEVVEQVK.A                        |                   |
|          |               |                                                           |        |       |         | 4.6E-05 | R.EMILADTLEGR.K                        |                   |
|          |               |                                                           |        |       |         | 7.5E-06 | R.EMILADTLEGR.K + Oxidation (M)        |                   |
|          |               |                                                           |        |       |         | 5.2E-07 | R.TPQQIGQSLSLR.W                       |                   |
|          | EAN88964.1    | glycosomal phosphoenolpyruvate<br>carboxykinase, putative | 59404  | 197   | 4       | 1.5E-04 | K.LSEESFAR.V                           | 1                 |
|          |               |                                                           |        |       |         | 6.4E-05 | K.TTLSADPHR.N                          |                   |
|          |               |                                                           |        |       |         | 2.3E-04 | K.TEKDIYDAVR.F                         |                   |
|          |               |                                                           |        |       |         | 1.5E-06 | R.HATFYGEQLAEK.M                       |                   |
|          | EAN95952.1    | hypothetical protein, conserved                           | 43691  | 196   | 4       | 4.0E-05 | K.VIANLLNR.-                           | 0                 |
|          |               |                                                           |        |       |         | 2.3E-04 | R.FVFTA VLP R.F                        |                   |
|          |               |                                                           |        |       |         | 2.0E-05 | K.IINLSAEEIR.A                         |                   |
|          |               |                                                           |        |       |         | 3.1E-06 | R.VIYLNLNNEEPR.T                       |                   |



| Spot no. | Accession no. | Protein Identity                                                                           | Mr    | SCORE | # PEPT. | E-value                       | Mascot<br>Sequence                                                                                  | Additional copies |
|----------|---------------|--------------------------------------------------------------------------------------------|-------|-------|---------|-------------------------------|-----------------------------------------------------------------------------------------------------|-------------------|
| 31 cont. | EAN94510.1    | mitochondrial processing peptidase, beta subunit, putative                                 | 55057 | 190   | 3       | 3.6E-07<br>1.1E-03<br>3.4E-09 | R.AVGLLADVVR.N<br>R.LADEDIQAQK.Q<br>R.VVVVVGSGAVDHTALER.A                                           | 0                 |
|          | EAN96732.1    | succinyl-CoA ligase [GDP-forming] beta-chain, putative                                     | 46089 | 178   | 3       | 2.6E-05<br>1.1E-05<br>2.4E-07 | R.AAENAAEQVK.A<br>R.TLEEVAAALGK.I<br>K.LSFDDNAEFR.Q                                                 | 0                 |
|          | EAN86097.1    | fructose-bisphosphate aldolase, glycosomal, putative                                       | 41279 | 174   | 3       | 8.7E-06<br>2.1E-06<br>2.3E-06 | K.IQNGTVSEAAVR.F<br>K.ASTGETFVQLLQR.K<br>R.VEVLQTLQPAYNR.L                                          | 2                 |
|          | EAN81757.1    | mitochondrial processing peptidase, beta subunit, putative                                 | 31341 | 162   | 2       | 1.2E-07<br>3.4E-09            | R.AAASNFGDLVAASTK.S<br>.VVVVVGSGAVDHTALER.A <i>not unique</i>                                       | 0                 |
|          | EAN94839.1    | beta tubulin, putative                                                                     | 50520 | 161   | 3       | 1.4E-07<br>1.5E-05<br>4.2E-04 | R.INVYFDEATGGR.Y<br>K.EVDEQMLNVQNK.N + Oxidation (M)<br>R.AVLIDLEPGTMDSVR.A + Oxidation             | 0                 |
|          | EAN85395.1    | 3-ketoacyl-CoA thiolase, putative                                                          | 46802 | 161   | 3       | 6.8E-06<br>4.9E-03<br>3.5E-08 | K.MGISPNDSSLVEIK.S + Oxidation (M)<br>K.AIQESQHFTMEDTAR.V + Oxidation (M)<br>K.SLAAASGNLYEDPPDATR.M | 1                 |
|          | EAN82857.1    | elongation factor 1-alpha (EF-1-alpha), putative                                           | 48884 | 118   | 3       | 4.7E-03<br>2.8E-04<br>2.5E-05 | K.SVNFAQER.Y<br>R.LPLQDVYK.I<br>K.IGGIGTVPVGR.V                                                     | 5                 |
|          | EAN81053.1    | alpha tubulin, putative                                                                    | 50549 | 106   | 2       | 1.4E-05<br>2.1E-05            | K.DVNAAVATIK.T<br>R.AVFLDLEPTVVDEIR.T                                                               | 0                 |
|          | EAN80998.1    | hypothetical protein, conserved                                                            | 39206 | 99    | 2       | 2.7E-06<br>2.3E-03            | K.ATADAEILSLR.Q<br>R.SSQIGGVGGTTTR.Q                                                                | 1                 |
|          | EAN92220.1    | pyruvate dehydrogenase E1 component alpha subunit, putative                                | 43381 | 94    | 1       | 3.9E-04<br>1.0E-05            | K.EVDQQLQPAEK.Q<br>K.GPIVLEFDSYR.Y                                                                  | 0                 |
|          | EAN93231.1    | pyruvate dehydrogenase E1 component alpha subunit, putative                                | 22293 | 88    | 2       | 1.6E-03<br>1.0E-05            | K.EVDQQLQPAEK.Q<br>K.GPIVLEFDSYR.Y <i>not unique</i>                                                | 0                 |
|          | EAN81897.1    | 2-oxoglutarate dehydrogenase, E2 component, dihydrolipoamide succinyltransferase, putative | 42903 | 58    | 1       | 3.0E-06                       | R.LIDGSDAVTFLVK.V                                                                                   | 1                 |
|          | EAN87141.1    | hexokinase, putative                                                                       | 52750 | 58    | 1       | 2.4E-01<br>7.7E-05            | R.MLPSYVYK.T + Oxidation (M)<br>R.ATVAIDGSVFEK.T                                                    | 1                 |

| Spot no. | Accession no.                         | Protein Identity                                   | Mr    | SCORE | # PEPT. | Mascot  |                                 | Additional copies |
|----------|---------------------------------------|----------------------------------------------------|-------|-------|---------|---------|---------------------------------|-------------------|
|          |                                       |                                                    |       |       |         | E-value | Sequence                        |                   |
| 31 cont. | EAN83022.1                            | hypothetical protein, conserved                    | 37536 | 57    | 1       | 9.5E-06 | R.QGLGSEVAEVK.A                 | 3                 |
|          | EAN81715.1                            | hypothetical protein, conserved                    | 41759 | 55    | 1       | 2.1E-05 | K.GVIAELDLSGR.L                 | 1                 |
|          | EAN82747.1                            | Gim5A protein, putative                            | 27268 | 44    | 1       | 2.9E-05 | R.LSLLLNALSSK.T                 | 2                 |
|          | EAN88684.1                            | heat shock protein DnaJ, putative                  | 45029 | 41    | 1       | 3.4E-04 | R.GEGDQIPGVR.L                  | 0                 |
|          | EAN87378.1                            | 3-hydroxy-3-methylglutaryl-CoA reductase, putative | 46865 | 36    | 1       | 8.4E-04 | K.ESPGTNAQLLSR.V                | 1                 |
|          | EAN87724.1                            | glutamate dehydrogenase, putative                  | 45525 | 33    | 1       | 1.5E-03 | R.VQFNSSIGPYK.G                 | 0                 |
|          | EAO00026.1                            | elongation factor TU, putative                     | 52462 | 28    | 2       | 9.4E-03 | K.IVGSGETVNLSK.E                | 1                 |
|          |                                       |                                                    |       |       |         | 7.9E-01 | R.AQVYVLTKEEGGR.H               |                   |
|          | EAN90286.1                            | glyceraldehyde 3-phosphate dehydrogenase, putative | 39292 | 22    | 1       | 9.6E-03 | R.AAAVNIPSTTGAAK.A              | 3                 |
|          | EAN99859.1                            | hypothetical protein, conserved                    | 13236 | 18    | 1       | 6.1E-02 | R.YYAMNSLTAIASVK.V              | 0                 |
| 32       | EAN92318.1                            | 69 kDa paraflagellar rod protein, putative         | 70087 | 1273  | 31      | 8.0E-03 | K.TVQQITQ.-                     | 0                 |
|          |                                       |                                                    |       |       |         | 1.2E-03 | K.AQLAAIEK.A                    |                   |
|          |                                       |                                                    |       |       |         | 1.6E-04 | K.TLGQLVYK.K                    |                   |
|          |                                       |                                                    |       |       |         | 5.7E-03 | K.RLEEIDR.N                     |                   |
|          |                                       |                                                    |       |       |         | 5.9E-04 | R.RIQELER.V                     |                   |
|          |                                       |                                                    |       |       |         | 5.0E-05 | R.GKTVQQITQ.-                   |                   |
|          |                                       |                                                    |       |       |         | 3.7E-04 | K.SFQETSAIK.D                   |                   |
|          |                                       |                                                    |       |       |         | 3.4E-04 | K.TLQSQQYR.G                    |                   |
|          |                                       |                                                    |       |       |         | 7.2E-03 | K.FIQENLDR.Q                    |                   |
|          |                                       |                                                    |       |       |         | 8.7E-04 | K.TLGQLVYKK.E                   |                   |
|          |                                       |                                                    |       |       |         | 5.8E-06 | K.TNEELADLR.L                   |                   |
|          |                                       |                                                    |       |       |         | 1.6E-02 | K.KSFQETSAIK.D                  |                   |
|          |                                       |                                                    |       |       |         | 8.6E-02 | R.LEEIDRNIR.T                   |                   |
|          |                                       |                                                    |       |       |         | 1.6E-02 | R.LGTERFEEVK.R                  |                   |
|          |                                       |                                                    |       |       |         | 9.4E-05 | R.SKTLQSQQYR.G                  |                   |
|          |                                       |                                                    |       |       |         | 9.5E-06 | K.WNLTEAYDIK.K                  |                   |
|          |                                       |                                                    |       |       |         | 3.5E-07 | K.AQELLSSVEGGTK.W               |                   |
|          |                                       |                                                    |       |       |         | 3.6E-06 | K.SFQETSAIKDAK.R                |                   |
|          |                                       |                                                    |       |       |         | 2.8E-03 | R.AQVEEELEMLK.D + Oxidation (M) |                   |
|          |                                       |                                                    |       |       |         | 7.5E-03 | K.WNLTEAYDIKK.L                 |                   |
| 2.1E-06  | R.TVSFTGTIDNAIAK.L                    |                                                    |       |       |         |         |                                 |                   |
| 4.2E-05  | R.LQVHQEYLEAFR.R                      |                                                    |       |       |         |         |                                 |                   |
| 1.5E-04  | R.AQVEEELEMLKDK.M + Oxidation (M)     |                                                    |       |       |         |         |                                 |                   |
| 3.1E-06  | R.IIGQTEDENKPFGR.I                    |                                                    |       |       |         |         |                                 |                   |
| 8.4E-07  | R.SQLDASEMAQVPVAVLK.N                 |                                                    |       |       |         |         |                                 |                   |
| 4.4E-07  | R.SQLDASEMAQVPVAVLK.N + Oxidation (M) |                                                    |       |       |         |         |                                 |                   |
| 2.5E-03  | R.TVSFTGTIDNAIAKLEK.I                 |                                                    |       |       |         |         |                                 |                   |

| Spot no. | Accession no. | Protein Identity                                 | Mr     | SCORE | # PEPT. | E-value | Mascot<br>Sequence                       | Additional copies |
|----------|---------------|--------------------------------------------------|--------|-------|---------|---------|------------------------------------------|-------------------|
| 32 cont. | EAN92318.1    | cont.                                            |        |       |         | 9.6E-04 | K.FIQENLDRQDEAWR.R                       |                   |
|          |               |                                                  |        |       |         | 2.2E-03 | R.TTHIQLEFAIETFDPAK.K                    |                   |
|          |               |                                                  |        |       |         | 1.4E-08 | R.NVAIADGEMAI AEEQYYIK.A + Oxidation (M) |                   |
|          |               |                                                  |        |       |         | 9.0E-04 | K.EASGAVGPADQQQPAVPEVTDVTLEAAR.K         |                   |
|          | EAN81200.1    | paraxonemal rod protein PAR2, putative           | 31620  | 554   | 15      | 1.4E-04 | K.TNEELGDLR.L                            | 0                 |
|          | EAN87979.1    | paraflagellar rod protein 3, putative            | 69189  | 493   | 12      | 1.0E+00 | K.VEEELRR.S                              | 0                 |
|          |               |                                                  |        |       |         | 3.9E-02 | K.TQLAQLEK.T                             |                   |
|          |               |                                                  |        |       |         | 5.1E-05 | R.LIDLIDQDK.F                            |                   |
|          |               |                                                  |        |       |         | 4.4E-05 | K.TSQDLAALR.L                            |                   |
|          |               |                                                  |        |       |         | 1.3E-04 | K.AQFMDIIGVK.K + Oxidation (M)           |                   |
|          |               |                                                  |        |       |         | 2.3E-03 | R.IEEVDREEK.R                            |                   |
|          |               |                                                  |        |       |         | 1.6E-02 | <i>K.LGTERFEEVK.R not unique</i>         |                   |
|          |               |                                                  |        |       |         | 5.6E-06 | R.LIDLIDQDKFR.L                          |                   |
|          |               |                                                  |        |       |         | 2.7E-05 | R.QGVEEELAMLK.E + Oxidation (M)          |                   |
|          |               |                                                  |        |       |         | 3.5E-03 | K.ADLEDAEAMKR.H + Oxidation (M)          |                   |
|          |               |                                                  |        |       |         | 4.3E-06 | R.SQLDATQLAQVPTR.T                       |                   |
|          |               |                                                  |        |       |         | 8.9E-08 | R.VVSFTQMIDNAIAK.M + Oxidation (M)       |                   |
|          | EAN96800.1    | lipophosphoglycan biosynthetic protein, putative | 86969  | 107   | 2       | 2.6E-02 | R.EVLQESR.I                              | 0                 |
|          |               |                                                  |        |       |         | 1.5E-08 | R.GIVDSNDLPLNVSRE                        |                   |
|          | EAN94839.1    | beta tubulin, putative                           | 50520  | 92    | 2       | 1.1E-05 | K.EVDEQMLNVQNK.N + Oxidation (M)         | 0                 |
|          |               |                                                  |        |       |         | 4.2E-04 | R.AVLIDLEPGTMDSVR.A + Oxidation (M)      |                   |
|          | EAN96878.1    | dynein, putative                                 | 69173  | 60    | 1       | 5.1E-06 | K.AAIGQMLNQSIR.D + Oxidation (M)         | 0                 |
|          | EAN81053.1    | alpha tubulin, putative                          | 50549  | 53    | 1       | 2.0E-05 | K.DVNAAVATIK.T                           | 0                 |
|          | EAN98352.1    | pyruvate phosphate dikinase, putative            | 101833 | 49    | 1       | 4.6E-05 | K.TAEETLAAAGQR.V                         | 1                 |
|          | EAN82747.1    | Gim5A protein, putative                          | 27268  | 40    | 1       | 7.5E-05 | R.LSLLLNALSSK.T                          | 2                 |
|          | EAN87573.1    | succinate dehydrogenase flavoprotein, putative   | 67998  | 21    | 1       | 1.5E-02 | R.AITLEVLAGR.G                           | 0                 |
| Spot 33  | EAN92318.1    | 69 kDa paraflagellar rod protein, putative       | 70087  | 1430  | 36      | 2.9E-05 | R.QDEAWR.R                               | 0                 |
|          |               |                                                  |        |       |         | 2.8E-03 | K.TVQQITQ.-                              |                   |
|          |               |                                                  |        |       |         | 7.9E-05 | K.AQLAAIEK.A                             |                   |
|          |               |                                                  |        |       |         | 3.1E-03 | K.TLGQLVYK.K                             |                   |
|          |               |                                                  |        |       |         | 3.8E-03 | K.RLEEIDR.N                              |                   |
|          |               |                                                  |        |       |         | 1.0E-03 | K.NLHDAIQK.A                             |                   |
|          |               |                                                  |        |       |         | 3.1E-03 | R.RIQELER.V                              |                   |
|          |               |                                                  |        |       |         | 1.1E-01 | R.QDEAWRR.I                              |                   |
|          |               |                                                  |        |       |         | 4.5E-04 | K.SFQETSAIK.D                            |                   |
|          |               |                                                  |        |       |         | 1.0E-02 | K.FIQENLDR.Q                             |                   |

| Spot no.   | Accession no.                         | Protein Identity | Mr    | SCORE | # PEPT. | E-value | Mascot<br>Sequence                       | Additional copies |
|------------|---------------------------------------|------------------|-------|-------|---------|---------|------------------------------------------|-------------------|
| 33 cont.   | EAN92318.1                            | cont.            |       |       |         | 7.9E-04 | K.TLGQLVYKK.E                            |                   |
|            |                                       |                  |       |       |         | 5.5E-03 | K.IAAEREELK.R                            |                   |
|            |                                       |                  |       |       |         | 1.1E-06 | K.TNEELADLR.L                            |                   |
|            |                                       |                  |       |       |         | 9.5E-03 | K.KSFQETSAIK.D                           |                   |
|            |                                       |                  |       |       |         | 2.0E-03 | R.LGTERFEEVK.R                           |                   |
|            |                                       |                  |       |       |         | 4.4E-04 | R.SKTLQSQYR.G                            |                   |
|            |                                       |                  |       |       |         | 1.2E-04 | K.WNLTEAYDIK.K                           |                   |
|            |                                       |                  |       |       |         | 7.0E-03 | K.ADMEDAEAMKR.F + Oxidation (M)          |                   |
|            |                                       |                  |       |       |         | 1.7E-05 | K.AQELLSSVEGGTK.W                        |                   |
|            |                                       |                  |       |       |         | 1.5E-06 | K.SFQETSAIKDAK.R                         |                   |
|            |                                       |                  |       |       |         | 2.3E-04 | R.AQVEEELEMLK.D + Oxidation (M)          |                   |
|            |                                       |                  |       |       |         | 4.1E-05 | K.WNLTEAYDIKK.L                          |                   |
|            |                                       |                  |       |       |         | 6.6E-08 | R.TVSFTGTIDNAIAK.L                       |                   |
|            |                                       |                  |       |       |         | 2.1E-05 | R.LQVHQEYLEAFR.R                         |                   |
|            |                                       |                  |       |       |         | 5.4E-04 | R.AQVEEELEMLKDK.M                        |                   |
|            |                                       |                  |       |       |         | 6.7E-06 | R.AQVEEELEMLKDK.M + Oxidation (M)        |                   |
|            |                                       |                  |       |       |         | 1.2E-07 | R.IIGQTEDENKPFGR.I                       |                   |
|            |                                       |                  |       |       |         | 3.1E-03 | R.LQVHQEYLEAFRR.L                        |                   |
|            |                                       |                  |       |       |         | 2.7E-08 | R.SQLDASEMAQVPVAVLK.N                    |                   |
|            |                                       |                  |       |       |         | 5.0E-07 | R.SQLDASEMAQVPVAVLK.N + Oxidation (M)    |                   |
|            |                                       |                  |       |       |         | 3.2E-03 | K.FIQENLDRQDEAWR.R                       |                   |
|            |                                       |                  |       |       |         | 2.7E-03 | R.TTHIQLEFAIETFDPNK.K                    |                   |
|            |                                       |                  |       |       |         | 1.6E-09 | R.NVAIADGEMAI AEEQYYIK.A                 |                   |
|            |                                       |                  |       |       |         | 6.5E-08 | R.NVAIADGEMAI AEEQYYIK.A + Oxidation (M) |                   |
|            |                                       |                  |       |       |         | 8.8E-04 | R.TTHIQLEFAIETFDPNK.H                    |                   |
|            |                                       |                  |       |       |         | 1.1E-04 | K.EASGAVGPADQQQPAVPEVTDVTLAAR.K          |                   |
| EAN87979.1 | paraflagellar rod protein 3, putative |                  | 69189 | 1135  | 31      | 2.0E-01 | R.QEEAWNK.I                              | 0                 |
|            |                                       |                  |       |       |         | 1.2E-01 | K.VEEELRR.S                              |                   |
|            |                                       |                  |       |       |         | 2.1E-03 | K.TQLAQLEK.T                             |                   |
|            |                                       |                  |       |       |         | 1.6E-05 | R.LIDLQDK.F                              |                   |
|            |                                       |                  |       |       |         | 3.3E-07 | K.TSQDLAALR.L                            |                   |
|            |                                       |                  |       |       |         | 2.5E-02 | K.EHLEYFR.M                              |                   |
|            |                                       |                  |       |       |         | 5.5E-03 | <i>K.IAAEREEIK.R not unique</i>          |                   |
|            |                                       |                  |       |       |         | 1.0E-03 | K.AQFMDIIGVK.K                           |                   |
|            |                                       |                  |       |       |         | 2.0E-04 | K.AQFMDIIGVK.K + Oxidation (M)           |                   |
|            |                                       |                  |       |       |         | 1.8E-03 | R.IEEVDREEK.R                            |                   |
|            |                                       |                  |       |       |         | 9.1E-06 | R.IGNNTAPARLE.-                          |                   |
|            |                                       |                  |       |       |         | 1.2E-03 | K.MEKVEEELR.R + Oxidation (M)            |                   |
|            |                                       |                  |       |       |         | 2.0E-03 | <i>K.LGTERFEEVK.R not unique</i>         |                   |

| Spot no.   | Accession no.                                    | Protein Identity | Mr  | SCORE | # PEPT. | E-value                             | Mascot<br>Sequence                   | Additional copies |
|------------|--------------------------------------------------|------------------|-----|-------|---------|-------------------------------------|--------------------------------------|-------------------|
| 33 cont.   | EAN87979.1                                       | cont.            |     |       |         | 2.3E-05                             | K.ADLEDAEAMKR.H                      |                   |
|            |                                                  |                  |     |       |         | 1.7E-05                             | R.LIDLIQDKFR.L                       |                   |
|            |                                                  |                  |     |       |         | 1.4E-05                             | R.QGVVEELAMLK.E + Oxidation (M)      |                   |
|            |                                                  |                  |     |       |         | 1.2E-03                             | K.ADLEDAEAMKR.H + Oxidation (M)      |                   |
|            |                                                  |                  |     |       |         | 2.7E-03                             | K.AQFMDIIGVKK.V + Oxidation (M)      |                   |
|            |                                                  |                  |     |       |         | 4.3E-05                             | K.AEELVASVDVGTK.W                    |                   |
|            |                                                  |                  |     |       |         | 2.1E-05                             | K.WNLTEAYDLAK.L                      |                   |
|            |                                                  |                  |     |       |         | 1.6E-06                             | R.MLYLTGSLIYK.K + Oxidation (M)      |                   |
|            |                                                  |                  |     |       |         | 2.3E-06                             | R.SQLDATQLAQVPTR.T                   |                   |
|            |                                                  |                  |     |       |         | 2.4E-02                             | K.LRQGVVEELAMLK.E + Oxidation (M)    |                   |
|            |                                                  |                  |     |       |         | 4.4E-05                             | R.VVSFTQMIDNAIAK.M                   |                   |
|            |                                                  |                  |     |       |         | 7.5E-09                             | R.VVSFTQMIDNAIAK.M + Oxidation (M)   |                   |
|            |                                                  |                  |     |       |         | 5.1E-02                             | R.ENEERQEEAWNK.I                     |                   |
|            |                                                  |                  |     |       |         | 2.0E-02                             | R.VEYSQFLEVASQHK.K                   |                   |
|            |                                                  |                  |     |       |         | 5.0E-05                             | R.RSQLDATQLAQVPTR.T                  |                   |
|            |                                                  |                  |     |       |         | 1.3E-01                             | R.VEYSQFLEVASQHK.L                   |                   |
|            |                                                  |                  |     |       |         | 1.3E-05                             | R.GAHLKAEELVASVDVGTK.W               |                   |
|            |                                                  |                  |     |       |         | 1.3E-04                             | K.QIEDIMNATQIQNALASTDDQIK.T + Oxidat |                   |
| EAN81200.1 | paraxonemal rod protein PAR2, putative           | 31620            | 652 | 19    | 8.1E-05 | K.TNEELGDLR.L                       |                                      | 0                 |
|            |                                                  |                  |     |       | 1.5E-03 | R.HDKTNEELGDLR.L                    |                                      |                   |
| EAN96800.1 | lipophosphoglycan biosynthetic protein, putative | 86969            | 382 | 9     | 2.6E-03 | R.MLYLTAPK.E + Oxidation (M)        |                                      | 0                 |
|            |                                                  |                  |     |       | 4.0E-02 | R.VIIDNERK.T                        |                                      |                   |
|            |                                                  |                  |     |       | 5.7E-05 | R.LGILEDANNR.G                      |                                      |                   |
|            |                                                  |                  |     |       | 6.7E-05 | K.ALSMISEIAEK.D + Oxidation (M)     |                                      |                   |
|            |                                                  |                  |     |       | 3.9E-05 | K.HIYFLTGDSVK.K                     |                                      |                   |
|            |                                                  |                  |     |       | 7.0E-02 | K.GRPISFQAEVSK.M                    |                                      |                   |
|            |                                                  |                  |     |       | 1.0E-09 | R.GIVDSNDLPLNVSRE                   |                                      |                   |
|            |                                                  |                  |     |       | 3.2E-05 | K.MLDILINSLYTNR.A + Oxidation (M)   |                                      |                   |
|            |                                                  |                  |     |       | 9.7E-03 | K.AELEEHLSLGTSGTK.R                 |                                      |                   |
| EAN94839.1 | beta tubulin, putative                           | 50520            | 333 | 7     | 1.1E-06 | K.LAVNLVFPFR.L                      |                                      | 0                 |
|            |                                                  |                  |     |       | 3.5E-05 | R.VGEQFTAMFR.R + Oxidation (M)      |                                      |                   |
|            |                                                  |                  |     |       | 1.6E-07 | R.INVYFDEATGGR.Y                    |                                      |                   |
|            |                                                  |                  |     |       | 6.6E-03 | R.IMMTFSIIPSPK.V + 2 Oxidation (M)  |                                      |                   |
|            |                                                  |                  |     |       | 4.6E-04 | K.EVDEQMLNVQNK.N + Oxidation (M)    |                                      |                   |
|            |                                                  |                  |     |       | 1.2E-05 | R.AVLIDLEPGTMDSVR.A + Oxidation (M) |                                      |                   |
|            |                                                  |                  |     |       | 8.9E-04 | R.GLSVPELTQQMFDK.N + Oxidation (M)  |                                      |                   |

| Spot no. | Accession no. | Protein Identity                                                | Mr     | SCORE | # PEPT. | E-value                                                        | Mascot<br>Sequence                                                                                                             | Additional copies |
|----------|---------------|-----------------------------------------------------------------|--------|-------|---------|----------------------------------------------------------------|--------------------------------------------------------------------------------------------------------------------------------|-------------------|
| 33 cont. | EAN87573.1    | succinate dehydrogenase flavoprotein,<br>putative               | 67998  | 286   | 6       | 5.3E-03<br>1.0E-04<br>5.0E-05<br>9.0E-06<br>3.8E-05<br>3.7E-07 | R.AITLEVLAGR.G<br>R.TKDGFIYQR.A<br>K.YTILATGGYGR.C<br>R.AFGGQSIHFGGK.Q<br>R.GEGGYLVNSEGER.F<br>R.LGANSLLDIVVFGK.S              | 0                 |
|          | EAN95887.1    | heat shock protein 70 (HSP70), putative                         | 73607  | 204   | 5       | 3.7E-03<br>3.4E-04<br>1.0E-02<br>4.3E-04<br>8.8E-08            | R.GTLQPVER.V<br>K.NTVNEPNVAGK.I<br>K.VMQLVSDFFGGK.E + Oxidation (M)<br>R.TTPSYVAFTDTER.L<br>K.NQVAMNPTNTVFDK.R + Oxidation (M) | 0                 |
|          | EAN95886.1    | heat shock protein 70 (HSP70), putative                         | 71171  | 202   | 5       | 7.1E-03                                                        | R.VEIIANDQGNR.T                                                                                                                | 0                 |
|          | EAN96878.1    | dynein, putative                                                | 69173  | 175   | 3       | 2.5E-06<br>1.3E-05<br>1.8E-06                                  | R.LQEELEVQR.R<br>K.LPEDSLTLLPK.S<br>K.AAIGQMLENQSIR.D + Oxidation                                                              | 0                 |
|          | EAN82857.1    | elongation factor 1-alpha (EF-1-alpha),<br>putative             | 48884  | 119   | 3       | 3.1E-03<br>1.2E-06<br>1.0E-02                                  | K.SVNFAQER.Y<br>K.IGGIGTVPVGR.V<br>R.VETGMTKPGDVVTFAPANVTTEVK.S + Oxidation (M)                                                | 5                 |
|          | EAN84370.1    | heat shock 70 kDa protein, mitochondrial<br>precursor, putative | 71585  | 104   | 2       | 7.3E-05<br>9.4E-06                                             | K.STGIDLSNER.M<br>K.DAGTIAGLNVIR.V                                                                                             | 0                 |
|          | EAN97980.1    | mitochondrial intermediate peptidase,<br>putative               | 77969  | 103   | 3       | 1.2E-02<br>7.3E-05<br>1.5E-03                                  | K.HAAYAFQK.G<br>K.ELVQEVMR.H + Oxidation (M)<br>R.TLGDSSDYGR.G                                                                 | 0                 |
|          | EAN98352.1    | pyruvate phosphate dikinase, putative                           | 101833 | 96    | 3       | 2.1E-05<br>2.8E-04<br>3.2E+00                                  | K.TAEETLAAAGQR.V<br>R.EMILADTLEGR.K + Oxidation (M)<br>R.VKSLHEMNPMGLGHR.G + Oxidation (M)                                     | 1                 |
|          | EAN81053.1    | alpha tubulin, putative                                         | 50549  | 86    | 2       | 2.4E-03<br>3.8E-06                                             | K.EDAANNYAR.G<br>R.AVFLDLEPTVVDEIR.T                                                                                           | 0                 |
|          | EAN82747.1    | Gim5A protein, putative                                         | 27268  | 63    | 1       | 3.7E-07                                                        | R.LSLLLNALSSK.T                                                                                                                | 2                 |
|          | EAN80947.1    | tryparedoxin peroxidase, putative                               | 22886  | 30    | 1       | 2.2E-03                                                        | R.QITVNDLPVGR.D                                                                                                                | 5                 |
| Spot 34  | EAN87979.1    | paraflagellar rod protein 3, putative                           | 69189  | 1246  | 39      | 8.0E-02<br>9.0E-04<br>2.5E-06                                  | R.QEEAWNK.I<br>K.KIYEVQK.Q<br>R.IGNNTAPAR.L                                                                                    | 0                 |

| Spot no.   | Accession no.                              | Protein Identity | Mr    | SCORE | # PEPT. | E-value | Sequence                             | Additional copies |
|------------|--------------------------------------------|------------------|-------|-------|---------|---------|--------------------------------------|-------------------|
| 34 cont.   | EAN87979.1                                 | cont.            |       |       |         | 1.8E-01 | K.VEEELRR.S                          |                   |
|            |                                            |                  |       |       |         | 1.0E-02 | K.TQLAQLEK.T                         |                   |
|            |                                            |                  |       |       |         | 6.6E-03 | R.EKSDGFVR.E                         |                   |
|            |                                            |                  |       |       |         | 1.7E-02 | K.RMEEIDR.N                          |                   |
|            |                                            |                  |       |       |         | 3.1E-05 | R.LIDLIQDK.F                         |                   |
|            |                                            |                  |       |       |         | 3.8E-06 | K.TSQDLAALR.L                        |                   |
|            |                                            |                  |       |       |         | 2.0E-01 | K.EHLEYFR.M                          |                   |
|            |                                            |                  |       |       |         | 3.2E-02 | R.ELYRPEDK.A                         |                   |
|            |                                            |                  |       |       |         | 8.8E-03 | K.IAAEREEIK.R                        |                   |
|            |                                            |                  |       |       |         | 9.0E-06 | K.ADLEDAEAMK.R + Oxidation (M)       |                   |
|            |                                            |                  |       |       |         | 2.5E-04 | K.AQFMDIIGVK.K                       |                   |
|            |                                            |                  |       |       |         | 2.1E-04 | K.AQFMDIIGVK.K + Oxidation (M)       |                   |
|            |                                            |                  |       |       |         | 3.0E-03 | R.IEEVDREEK.R                        |                   |
|            |                                            |                  |       |       |         | 4.9E-04 | R.IGNNTAPARLE.-                      |                   |
|            |                                            |                  |       |       |         | 1.6E-03 | K.MEKVEEELR.R + Oxidation (M)        |                   |
|            |                                            |                  |       |       |         | 1.1E-02 | K.LGTERFEEVK.R                       |                   |
|            |                                            |                  |       |       |         | 2.5E-04 | R.QGVEEELAMLK.E                      |                   |
|            |                                            |                  |       |       |         | 3.6E-05 | K.ADLEDAEAMKR.H                      |                   |
|            |                                            |                  |       |       |         | 3.2E-05 | R.LIDLIQDKFR.L                       |                   |
|            |                                            |                  |       |       |         | 2.0E-05 | R.QGVEEELAMLK.E + Oxidation (M)      |                   |
|            |                                            |                  |       |       |         | 2.2E-03 | K.ADLEDAEAMKR.H + Oxidation (M)      |                   |
|            |                                            |                  |       |       |         | 5.6E-03 | K.AQFMDIIGVKK.V + Oxidation (M)      |                   |
|            |                                            |                  |       |       |         | 1.4E-06 | K.WNLTEAYDLAK.L                      |                   |
|            |                                            |                  |       |       |         | 2.7E-07 | R.MLYLTLGSLIYK.K + Oxidation (M)     |                   |
|            |                                            |                  |       |       |         | 1.2E+00 | R.QGVEEELAMLKEK.Q + Oxidation (M)    |                   |
|            |                                            |                  |       |       |         | 4.6E-06 | R.SQLDATQLAQPTR.T                    |                   |
|            |                                            |                  |       |       |         | 1.6E-05 | K.LRQGVEEELAMLK.E + Oxidation (M)    |                   |
|            |                                            |                  |       |       |         | 7.3E-07 | R.VVSFTQMIDNAIAK.M                   |                   |
|            |                                            |                  |       |       |         | 1.7E-07 | R.VVSFTQMIDNAIAK.M + Oxidation (M)   |                   |
|            |                                            |                  |       |       |         | 1.0E-02 | R.ENEERQEEAWNK.I                     |                   |
|            |                                            |                  |       |       |         | 1.8E-05 | R.VEYSQFLEVASQHK.K                   |                   |
|            |                                            |                  |       |       |         | 2.2E-05 | R.RSQLDATQLAQPTR.T                   |                   |
|            |                                            |                  |       |       |         | 4.9E-02 | R.VEYSQFLEVASQHK.L                   |                   |
|            |                                            |                  |       |       |         | 4.6E-05 | R.RVEYSQFLEVASQHK.K                  |                   |
|            |                                            |                  |       |       |         | 8.6E-10 | R.GAHLKAEELVASVDVGTK.W               |                   |
|            |                                            |                  |       |       |         | 9.2E-06 | K.QIEDIMNATQIQNALASTDDQIK.T + Oxidat |                   |
| EAN92318.1 | 69 kDa paraflagellar rod protein, putative |                  | 70087 | 955   | 23      | 7.7E-03 | K.TVQQITQ.-                          | 0                 |
|            |                                            |                  |       |       |         | 1.1E-03 | K.AQLAAIEK.A                         |                   |
|            |                                            |                  |       |       |         | 2.6E-03 | K.TLGQLVYK.K                         |                   |

| Spot no.   | Accession no.                                     | Protein Identity | Mr  | SCORE | # PEPT. | E-value          | Sequence                                 | Additional copies |
|------------|---------------------------------------------------|------------------|-----|-------|---------|------------------|------------------------------------------|-------------------|
| 34 cont.   | EAN92318.1                                        | cont.            |     |       |         | 1.6E-02          | K.RLEEIDR.N                              |                   |
|            |                                                   |                  |     |       |         | 9.3E-03          | K.NLHDAIQK.A                             |                   |
|            |                                                   |                  |     |       |         | 1.6E-03          | R.RIQELER.V                              |                   |
|            |                                                   |                  |     |       |         | 4.4E-04          | K.SFQETSAIK.D                            |                   |
|            |                                                   |                  |     |       |         | 3.3E-04          | K.TLQSQQYR.G                             |                   |
|            |                                                   |                  |     |       |         | 1.2E-02          | K.FIQENLDR.Q                             |                   |
|            |                                                   |                  |     |       |         | 8.8E-03          | <i>K.IAAEREELK.R not unique</i>          |                   |
|            |                                                   |                  |     |       |         | 3.5E-07          | K.TNEELADLR.L                            |                   |
|            |                                                   |                  |     |       |         | 1.1E-02          | K.KSFQETSAIK.D                           |                   |
|            |                                                   |                  |     |       |         | 1.1E-02          | <i>R.LGTERFEEVK.R not unique</i>         |                   |
|            |                                                   |                  |     |       |         | 7.2E-05          | K.WNLTEAYDIK.K                           |                   |
|            |                                                   |                  |     |       |         | 2.7E-06          | K.AQELLSSVEGGTK.W                        |                   |
|            |                                                   |                  |     |       |         | 8.5E-06          | K.SFQETSAIKDAK.R                         |                   |
|            |                                                   |                  |     |       |         | 1.2E-02          | R.AQVEEELEMLK.D + Oxidation (M)          |                   |
|            |                                                   |                  |     |       |         | 8.4E-08          | R.TVSFTGTIDNAIAK.L                       |                   |
|            |                                                   |                  |     |       |         | 6.2E-06          | R.AQVEEELEMLKDK.M + Oxidation (M)        |                   |
|            |                                                   |                  |     |       |         | 7.7E-05          | R.IIGQTEDENKPFGR.I                       |                   |
|            |                                                   |                  |     |       |         | 7.9E-07          | R.SQLDASEMAQVPVAVLK.N + Oxidation (M)    |                   |
|            |                                                   |                  |     |       |         | 1.4E-04          | R.NVAIADGEMAIABEEQYYIK.A + Oxidation (M) |                   |
|            |                                                   |                  |     |       |         | 2.7E-04          | K.EASGAVGPADQQQPAVPEVTDVTLAAR.K          |                   |
| EAN81200.1 | paraxonemal rod protein PAR2, putative            | 31620            | 350 | 10    | 7.7E-05 | K.TNEELGDLR.L    |                                          | 0                 |
| EAN94839.1 | beta tubulin, putative                            | 50520            | 218 | 4     | 3.4E-05 | K.LAVNLVPPFR.L   |                                          | 0                 |
|            |                                                   |                  |     |       |         | 5.2E-07          | R.INVYFDEATGGR.Y                         |                   |
|            |                                                   |                  |     |       |         | 3.9E-06          | K.EVDEQMLNVQNK.N + Oxidation (M)         |                   |
|            |                                                   |                  |     |       |         | 3.1E-05          | R.AVLIDLEPGTMDSVR.A + Oxidation          |                   |
| EAN98352.1 | pyruvate phosphate dikinase, putative             | 101833           | 193 | 4     | 5.3E-05 | K.TAEETLAAAGQR.V |                                          | 1                 |
|            |                                                   |                  |     |       |         | 8.6E-07          | R.TPQQIGQSLSLR.W                         |                   |
|            |                                                   |                  |     |       |         | 3.7E-08          | R.LETSPEDLAGMDAAR.G + Oxidation (M)      |                   |
|            |                                                   |                  |     |       |         | 2.2E+00          | R.VKSLHEMNPMLGHR.G + Oxidation (M)       |                   |
| EAN87573.1 | succinate dehydrogenase flavoprotein, putative    | 67998            | 55  | 2     | 6.6E-02 | R.AITLEVLAGR.G   |                                          | 0                 |
|            |                                                   |                  |     |       |         | 2.0E-04          | R.GEGGYLVNSEGER.F                        |                   |
| EAN82747.1 | Gim5A protein, putative                           | 27268            | 52  | 1     | 4.0E-06 | R.LSLLLNALSSK.T  |                                          | 2                 |
| EAN81053.1 | alpha tubulin, putative                           | 50549            | 51  | 1     | 3.3E-05 | K.DVNAAVATIK.T   |                                          | 0                 |
| EAN87966.1 | glucose-regulated protein 78, putative            | 71414            | 48  | 1     | 4.7E-05 | R.NSLESVAYSLR.N  |                                          | 0                 |
| EAN96060.1 | glutamamyl carboxypeptidase, putative             | 44531            | 32  | 1     | 1.8E-03 | K.LVSFDTTSR.N    |                                          | 0                 |
| EAN82857.1 | elongation factor 1-alpha (EF-1-alpha), putative  | 48884            | 29  | 1     | 6.5E-03 | K.SVNFAQER.Y     |                                          | 6                 |
| EAN84330.1 | mucin-associated surface protein (MASP), putative | 44673            | 21  | 1     | 2.9E-02 | K.VAISLPSR.M     |                                          | 1                 |



**TABLE S5 (SPOTS 35-39): COMPLETE PEPTIDE LIST**

| Spot no. | Accession no. | Protein Identity                      | Mr    | SCORE | # PEPT. | E-value | Mascot Sequence                             | Additional gene copies under same match |
|----------|---------------|---------------------------------------|-------|-------|---------|---------|---------------------------------------------|-----------------------------------------|
| Spot 35  | EAN87979.1    | paraflagellar rod protein 3, putative | 69189 | 1219  | 34      | 5.3E-02 | R.QEEAWNK.I                                 | 0                                       |
|          |               |                                       |       |       |         | 1.0E-03 | K.KIYEVQK.Q                                 |                                         |
|          |               |                                       |       |       |         | 1.4E-06 | R.IGNNTAPAR.L                               |                                         |
|          |               |                                       |       |       |         | 1.1E-01 | K.VEEELRR.S                                 |                                         |
|          |               |                                       |       |       |         | 4.0E-02 | K.TQLAQLEK.T                                |                                         |
|          |               |                                       |       |       |         | 1.5E-05 | R.LIDLIQDK.F                                |                                         |
|          |               |                                       |       |       |         | 2.3E-02 | K.EHLEYFR.M                                 |                                         |
|          |               |                                       |       |       |         | 5.1E-03 | K.IAAEREEIK.R                               |                                         |
|          |               |                                       |       |       |         | 2.9E-06 | K.ADLEDAEAMK.R + Oxidation (M)              |                                         |
|          |               |                                       |       |       |         | 3.9E-04 | K.AQFMDIIGVK.K                              |                                         |
|          |               |                                       |       |       |         | 1.3E-04 | K.AQFMDIIGVK.K + Oxidation (M)              |                                         |
|          |               |                                       |       |       |         | 4.6E-03 | R.IEEVDREEK.R                               |                                         |
|          |               |                                       |       |       |         | 1.2E-03 | R.IGNNTAPARLE.-                             |                                         |
|          |               |                                       |       |       |         | 8.6E-03 | K.MEKVEEELR.R + Oxidation (M)               |                                         |
|          |               |                                       |       |       |         | 4.0E-01 | K.LGTERFEEVK.R                              |                                         |
|          |               |                                       |       |       |         | 1.3E-06 | R.QGVEEELAMLK.E                             |                                         |
|          |               |                                       |       |       |         | 4.7E-05 | K.ADLEDAEAMKR.H                             |                                         |
|          |               |                                       |       |       |         | 4.5E-04 | R.LIDLIQDKFR.L                              |                                         |
|          |               |                                       |       |       |         | 2.3E-05 | R.QGVEEELAMLK.E + Oxidation (M)             |                                         |
|          |               |                                       |       |       |         | 6.9E-04 | K.ADLEDAEAMKR.H + Oxidation (M)             |                                         |
|          |               |                                       |       |       |         | 3.4E-05 | K.WNLTEAYDLAK.L                             |                                         |
|          |               |                                       |       |       |         | 7.4E-07 | R.MLYLTLGSLIYK.K + Oxidation (M)            |                                         |
|          |               |                                       |       |       |         | 4.6E-06 | R.SQLDATQLAQVPTR.T                          |                                         |
|          |               |                                       |       |       |         | 4.7E-04 | K.LRQGVVEEELAMLK.E + Oxidation (M)          |                                         |
|          |               |                                       |       |       |         | 2.1E-06 | R.VVSFTQMIDNAIAK.M                          |                                         |
|          |               |                                       |       |       |         | 7.0E-09 | R.VVSFTQMIDNAIAK.M + Oxidation (M)          |                                         |
|          |               |                                       |       |       |         | 7.2E-02 | R.ENEERQEEAWNK.I                            |                                         |
|          |               |                                       |       |       |         | 1.6E-05 | R.VEYSQFLEVASQHK.K                          |                                         |
|          |               |                                       |       |       |         | 2.1E-06 | R.RSQLDATQLAQVPTR.T                         |                                         |
|          |               |                                       |       |       |         | 3.4E-01 | R.VEYSQFLEVASQHKK.L                         |                                         |
|          |               |                                       |       |       |         | 1.4E-04 | R.RVEYSQFLEVASQHK.K                         |                                         |
|          |               |                                       |       |       |         | 1.6E-04 | R.GAHLKAEELVASVDVGK.W                       |                                         |
|          |               |                                       |       |       |         |         | K.QIEDIMNATQIQNALASTDDQIK.T + Oxidation (M) |                                         |
|          |               |                                       |       |       |         | 1.2E-06 |                                             |                                         |

| Spot no.   | Accession no.                          | Protein Identity                           | Mr    | SCORE | # PEPT. | E-value                             | Mascot Sequence                                                                   | Additional copies |
|------------|----------------------------------------|--------------------------------------------|-------|-------|---------|-------------------------------------|-----------------------------------------------------------------------------------|-------------------|
| 35 cont.   | EAN87979.1                             | cont.                                      |       |       |         | 8.0E-06                             | K.TNEIQNVAMHDGEMQVAEEQMWTK.V + 3<br>Oxidation (M)                                 |                   |
|            | EAN92318.1                             | 69 kDa paraflagellar rod protein, putative | 70087 | 953   | 21      | 1.6E-02                             | K.TVQQITQ.-                                                                       | 0                 |
|            |                                        |                                            |       |       |         | 1.4E-04                             | K.AQLAAIEK.A                                                                      |                   |
|            |                                        |                                            |       |       |         | 2.6E-04                             | K.TLGQLVYK.K                                                                      |                   |
|            |                                        |                                            |       |       |         | 3.5E-03                             | K.RLEEIDR.N                                                                       |                   |
|            |                                        |                                            |       |       |         | 2.2E-03                             | R.RIQELER.V                                                                       |                   |
|            |                                        |                                            |       |       |         | 4.9E-04                             | K.SFQETSAIK.D                                                                     |                   |
|            |                                        |                                            |       |       |         | 5.0E-03                             | K.FIQENLDR.Q                                                                      |                   |
|            |                                        |                                            |       |       |         | 5.1E-03                             | <i>K.IAAEREELK.R not unique</i>                                                   |                   |
|            |                                        |                                            |       |       |         | 8.5E-08                             | K.TNEELADLR.L                                                                     |                   |
|            |                                        |                                            |       |       |         | 1.4E-03                             | K.KSFQETSAIK.D                                                                    |                   |
|            |                                        |                                            |       |       |         | 4.0E-01                             | <i>R.LGTERFEEVK.R not unique</i>                                                  |                   |
|            |                                        |                                            |       |       |         | 7.2E-05                             | K.WNLTEAYDIK.K                                                                    |                   |
|            |                                        |                                            |       |       |         | 9.1E-07                             | K.AQELSSVEGGTK.W                                                                  |                   |
|            |                                        |                                            |       |       |         | 6.0E-05                             | K.SFQETSAIKDAK.R                                                                  |                   |
|            |                                        |                                            |       |       |         | 3.0E-03                             | R.AQVEEELEMLK.D + Oxidation (M)                                                   |                   |
|            |                                        |                                            |       |       |         | 9.4E-07                             | R.TVSFTGTIDNAIAK.L                                                                |                   |
|            |                                        |                                            |       |       |         | 1.4E-04                             | R.AQVEEELEMLKDK.M + Oxidation (M)                                                 |                   |
|            |                                        |                                            |       |       |         | 1.9E-08                             | R.IIGQTE DENKPFGR.I                                                               |                   |
|            |                                        |                                            |       |       |         | 8.9E-07                             | R.SQLDASEMAQVPVAVLK.N + Oxidation (M)<br>R.NVAIADGEMAI AEEQYYIK.A + Oxidation (M) |                   |
|            |                                        |                                            |       |       | 1.2E-05 | (M)                                 |                                                                                   |                   |
|            |                                        |                                            |       |       | 9.0E-06 | K.EASGAVGPADQQQPAVPEVTDVTLEAAR.K    |                                                                                   |                   |
| EAN81200.1 | paraxonemal rod protein PAR2, putative | 31620                                      | 297   | 9     | 2.0E-04 | K.TNEELGDLR.L only unique           | 0                                                                                 |                   |
| EAN94839.1 | beta tubulin, putative                 | 50520                                      | 279   | 6     | 2.8E-05 | K.LAVNLVPPFR.L                      | 0                                                                                 |                   |
|            |                                        |                                            |       |       | 4.3E-05 | R.VGEQFTAMFR.R + Oxidation (M)      |                                                                                   |                   |
|            |                                        |                                            |       |       | 4.2E-06 | R.INVYFDEATGGR.Y                    |                                                                                   |                   |
|            |                                        |                                            |       |       | 1.2E-02 | R.IMMTFSIIPSPK.V + 2 Oxidation (M)  |                                                                                   |                   |
|            |                                        |                                            |       |       | 1.2E-05 | K.EVDEQMLNVQNK.N + Oxidation (M)    |                                                                                   |                   |
|            |                                        |                                            |       |       | 2.5E-05 | R.AVLIDLEPGTMDSVR.A + Oxidation (M) |                                                                                   |                   |
| EAN81053.1 | alpha tubulin, putative                | 50549                                      | 155   | 3     | 3.1E-05 | K.DVNAAVATIK.T                      | 0                                                                                 |                   |
|            |                                        |                                            |       |       | 5.6E-04 | K.EDAANNYAR.G                       |                                                                                   |                   |
|            |                                        |                                            |       |       | 2.5E-07 | R.AVFLDLEPTVVDEIR.T                 |                                                                                   |                   |
| EAN96878.1 | dynein, putative                       | 69173                                      | 83    | 2     | 1.3E-03 | R.LQEELEVQR.R                       | 0                                                                                 |                   |
|            |                                        |                                            |       |       | 5.1E-05 | K.AAIGQMLENQSIR.D + Oxidation (M)   |                                                                                   |                   |

| Spot no.   | Accession no.                       | Protein Identity                                 | Mr     | SCORE | # PEPT. | E-value        | Mascot Sequence                    | Additional copies |
|------------|-------------------------------------|--------------------------------------------------|--------|-------|---------|----------------|------------------------------------|-------------------|
| 35 cont.   | EAN82857.1                          | elongation factor 1-alpha (EF-1-alpha), putative | 48884  | 81    | 2       | 2.0E-06        | K.IGGIGTVPVGR.V                    | 5                 |
|            |                                     |                                                  |        |       |         | 3.0E-02        | K.STATGHLIYK.C                     |                   |
|            | EAN98352.1                          | pyruvate phosphate dikinase, putative            | 101833 | 66    | 2       | 9.4E-07        | R.TPQQIGQSLSLR.W                   | 1                 |
|            |                                     |                                                  |        |       |         | 3.2E+00        | R.VKSLHEMNPMLGHR.G + Oxidation (M) |                   |
|            | EAN98272.1                          | eukaryotic initiation factor 4a, putative        | 49984  | 66    | 1       | 7.6E-07        | R.ELALQTAEVITR.I                   | 1                 |
|            | EAN87966.1                          | glucose-regulated protein 78, putative           | 71414  | 65    | 2       | 1.2E-04        | R.NSLESVAYSLR.N                    | 0                 |
|            |                                     |                                                  |        |       |         | 1.3E-02        | K.LQSVTNPIIQK.V                    |                   |
|            | EAN82747.1                          | Gim5A protein, putative                          | 27268  | 61    | 1       | 5.7E-07        | R.LSLLLNALSSK.T                    | 2                 |
|            | EAN96800.1                          | lipophosphoglycan biosynthetic protein, putative | 86969  | 61    | 1       | 1.8E-06        | R.GIVDSNDLPLNVS.R                  | 0                 |
|            |                                     |                                                  |        |       |         |                | R.GIVDSNDLPLNVS.R                  |                   |
|            | EAN87573.1                          | succinate dehydrogenase flavoprotein, putative   | 67998  | 50    | 1       | 2.6E-05        | R.GEGGYLVNSEGER.F                  | 0                 |
|            | EAN83852.1                          | heat shock 70 kDa protein, putative              | 41044  | 50    | 1       | 4.1E-05        | K.NQVAMNPTNTVFDK.R + Oxidation (M) | 4                 |
|            | EAN80947.1                          | tryparedoxin peroxidase, putative                | 22886  | 43    | 1       | 1.2E-04        | R.QITVNDLPVGR.D                    | 5                 |
|            | EAN95112.1                          | hypothetical protein, conserved                  | 90858  | 40    | 1       | 2.3E-04        | R.EALSSIEQTLR.L                    | 0                 |
| EAN87401.1 | dynein intermediate chain, putative | 75900                                            | 35     | 2     | 2.6E-01 | R.AVTSISLNNR.Y | 1                                  |                   |
|            |                                     |                                                  |        |       | 1.6E-02 | R.HFSQDGSTVR.K |                                    |                   |
| EAN85221.1 | hypothetical protein, conserved     | 84600                                            | 21     | 1     | 4.8E-02 | R.STVAALEER.L  | 0                                  |                   |
| EAN81833.1 | prostaglandin F2alpha synthase      | 28479                                            | 17     | 1     | 4.6E-02 | R.CQLIYDVTK.S  | 1                                  |                   |
| Spot 36    | EAN94839.1                          | beta tubulin, putative                           | 50520  | 912   | 27      | 2.1E-01        | R.BEYPDR.I                         | 0                 |
|            |                                     |                                                  |        |       |         | 1.4E-01        | K.SSICDIPK.G                       |                   |
|            |                                     |                                                  |        |       |         | 1.8E-05        | K.NMMQAADPR.H                      |                   |
|            |                                     |                                                  |        |       |         | 6.8E-05        | R.YLTASALFR.G                      |                   |
|            |                                     |                                                  |        |       |         | 7.4E-05        | K.NMMQAADPR.H + Oxidation (M)      |                   |
|            |                                     |                                                  |        |       |         | 6.9E-06        | K.NMMQAADPR.H + 2 Oxidation (M)    |                   |
|            |                                     |                                                  |        |       |         | 3.3E-03        | K.LREEYPDR.I                       |                   |
|            |                                     |                                                  |        |       |         | 1.5E-06        | K.LAVNLVPFPR.L                     |                   |
|            |                                     |                                                  |        |       |         | 3.0E-05        | R.FPGQLNSDLR.K                     |                   |
|            |                                     |                                                  |        |       |         | 7.1E-07        | R.VGEQFTAMFR.R                     |                   |
|            |                                     |                                                  |        |       |         | 9.2E-07        | R.VGEQFTAMFR.R + Oxidation (M)     |                   |
|            |                                     |                                                  |        |       |         | 7.4E-03        | R.KLAVNLVPFPR.L                    |                   |
|            |                                     |                                                  |        |       |         | 1.6E-03        | R.FPGQLNSDLR.L                     |                   |
|            |                                     |                                                  |        |       |         | 3.8E-08        | R.INVYFDEATGGR.Y                   |                   |
|            |                                     |                                                  |        |       |         | 1.2E-03        | R.RVGEQFTAMFR.R                    |                   |
|            |                                     |                                                  |        |       |         | 1.8E-07        | R.IMMTFSIIPSPK.V                   |                   |
| 1.4E-05    | K.EVDEQMLNVQNK.N                    |                                                  |        |       |         |                |                                    |                   |
| 2.4E-05    | K.EVDEQMLNVQNK.N + Oxidation (M)    |                                                  |        |       |         |                |                                    |                   |
| 1.2E-06    | R.AVLIDLEPGTMDSVR.A                 |                                                  |        |       |         |                |                                    |                   |
| 2.9E-06    | R.AVLIDLEPGTMDSVR.A + Oxidation (M) |                                                  |        |       |         |                |                                    |                   |

| Spot no.   | Accession no.                             | Protein Identity | Mr    | SCORE | # PEPT. | E-value    | Mascot Sequence                       | Additional copies |
|------------|-------------------------------------------|------------------|-------|-------|---------|------------|---------------------------------------|-------------------|
| 36 cont.   | EAN94839.1                                | cont.            |       |       |         | 1.5E-06    | R.LHFFMMMGFAPLTSR.G                   |                   |
|            |                                           |                  |       |       |         | 5.3E-04    | R.LHFFMMMGFAPLTSR.G + Oxidation (M)   |                   |
|            |                                           |                  |       |       |         | 1.2E-05    | R.GLSVPELTQQMFDK.N + Oxidation (M)    |                   |
|            |                                           |                  |       |       |         | 6.8E-06    | R.LHFFMMMGFAPLTSR.G + 2 Oxidation (M) |                   |
|            |                                           |                  |       |       |         | 1.2E-04    | K.NSSYFIEWIPNNIK.S                    |                   |
|            |                                           |                  |       |       |         | 1.6E+00    | K.MAVTFVGNNTCIQEMFR.R + Oxidation (M) |                   |
|            |                                           |                  |       |       |         | 9.4E-08    | K.FWEVISDEHGVDPTGTQGDSDLQLER.I        |                   |
| EAN81053.1 | alpha tubulin, putative                   |                  | 50549 | 632   | 13      | 3.4E-04    | R.EDLAALEK.D                          | 0                 |
|            |                                           |                  |       |       |         | 7.6E-03    | R.LSVDYGGK.S                          |                   |
|            |                                           |                  |       |       |         | 3.3E-05    | K.DVNAAVATIK.T                        |                   |
|            |                                           |                  |       |       |         | 8.0E-04    | K.EDAANNYAR.G                         |                   |
|            |                                           |                  |       |       |         | 1.7E-01    | R.IDHKFDLMYSK.R                       |                   |
|            |                                           |                  |       |       |         | 1.3E-02    | R.QLFHPEQLISGK.E                      |                   |
|            |                                           |                  |       |       |         | 4.1E-03    | R.IDHKFDLMYSK.R + Oxidation (M)       |                   |
|            |                                           |                  |       |       |         | 1.9E-09    | R.LIGQVVSALTASLR.F                    |                   |
|            |                                           |                  |       |       |         | 1.9E-05    | R.TIQFVDWSPTGFK.C                     |                   |
|            |                                           |                  |       |       |         | 6.6E-07    | R.AVFLDLEPTVVDEIR.T                   |                   |
|            |                                           |                  |       |       |         | 1.5E-03    | R.NLDIERPTYTNLNR.L                    |                   |
|            |                                           |                  |       |       |         | 3.4E-08    | R.IHFVLTSYAPVISAEL.A                  |                   |
|            |                                           |                  |       |       |         | 6.3E-12    | R.FDGALNVDLTFQTNLVPYPR.I              |                   |
|            |                                           |                  |       |       |         | EAN95983.1 | ATPase beta subunit, putative         |                   |
| 8.1E-04    | K.MAEAAELEK.L + Oxidation (M)             |                  |       |       |         |            |                                       |                   |
| 2.5E-03    | K.VVSSGGNISVPVGR.E                        |                  |       |       |         |            |                                       |                   |
| 2.4E-06    | K.TVIIMELINNVAK.G + Oxidation (M)         |                  |       |       |         |            |                                       |                   |
| 3.2E-06    | R.VAQSALTMAEYFR.D + Oxidation (M)         |                  |       |       |         |            |                                       |                   |
| 1.7E-08    | K.LADQAAEDTILTTGIK.V                      |                  |       |       |         |            |                                       |                   |
| EAN97655.1 | chaperonin HSP60, mitochondrial precursor |                  | 59991 | 262   | 4       | 8.4E-08    | K.VGGGSEVEVNEK.K                      | 1                 |
|            |                                           |                  |       |       |         | 9.2E-09    | R.AVGVILQSVAEQSR.K                    |                   |
|            |                                           |                  |       |       |         | 1.5E-04    | R.AAVQEGIVPGGGVALLR.A                 |                   |
|            |                                           |                  |       |       |         | 2.3E-07    | K.ALDSSLGDSSLTADQR.T                  |                   |
| EAN87966.1 | glucose-regulated protein 78, putative    |                  | 71414 | 166   | 5       | 1.4E-02    | K.GTLVPVQR.V                          | 0                 |
|            |                                           |                  |       |       |         | 6.6E-03    | K.KEEITITNDK.G                        |                   |
|            |                                           |                  |       |       |         | 1.8E-05    | R.EAAEFEDR.K                          |                   |
|            |                                           |                  |       |       |         | 6.6E-05    | R.NSLESVAYSLR.N                       |                   |
|            |                                           |                  |       |       |         | 1.9E-03    | K.LQSVTNPIIQK.V                       |                   |
| EAN82340.1 | calreticulin, putative                    |                  | 46419 | 160   | 5       | 7.4E-04    | K.FYADAEK.S                           | 0                 |
|            |                                           |                  |       |       |         | 6.6E-02    | R.IRFPEDK.L                           |                   |
|            |                                           |                  |       |       |         | 1.5E-01    | R.QIPNPAYK.G                          |                   |

| Spot no.   | Accession no.                                | Protein Identity                          | Mr    | SCORE | # PEPT. | E-value             | Mascot Sequence                 | Additional copies |
|------------|----------------------------------------------|-------------------------------------------|-------|-------|---------|---------------------|---------------------------------|-------------------|
| 36 cont.   | EAN82340.1                                   | cont.                                     |       |       |         | 5.5E-04             | K.SMEHWTTSK.H                   |                   |
|            |                                              |                                           |       |       |         | 3.3E-06             | K.GQLEEDWSLLLPR.E               |                   |
|            | EAN90720.1                                   | calreticulin, putative                    | 46396 | 139   | 5       | 3.1E-04             | R.FYALSTAFPITNEK.K              | 0                 |
|            | EAN98377.1                                   | importin alpha, putative                  | 58727 | 67    | 1       | 3.9E-07             | R.VQAVVDAGVVPR.M                | 0                 |
|            | EAN99322.1                                   | protein disulfide isomerase, putative     | 54011 | 47    | 2       | 3.8E-02             | K.FIIEYSEK.K                    | 0                 |
|            |                                              |                                           |       |       |         | 4.7E-04             | K.GFPTILFR.D                    |                   |
|            | EAN81110.1                                   | calpain-like cysteine peptidase, putative | 72116 | 33    | 1       | 1.4E-03             | R.EIAALEESMNAR.A                | 2                 |
|            | EAO00045.1                                   | aconitase, putative                       | 99497 | 28    | 1       | 1.3E-02             | R.SVEQLER.I                     | 0                 |
| EAN83235.1 | hypothetical protein, conserved              | 124306                                    | 18    | 1     | 4.4E-02 | K.NLQADPHDPTSILVR.C | 1                               |                   |
| EAN91861.1 | pyrroline-5-carboxylate reductase, putative  | 29137                                     | 18    | 1     | 7.4E-02 | K.IRDAVTEDK.I       | 0                               |                   |
| Spot 37    | EAN81053.1                                   | alpha tubulin, putative                   |       |       |         | 3.9E-04             | R.EDLAALEK.D                    | 0                 |
|            |                                              |                                           |       |       |         | 3.5E-04             | K.FDLMYSK.R                     |                   |
|            |                                              |                                           |       |       |         | 1.9E-03             | R.LSVDYGKK.S                    |                   |
|            |                                              |                                           |       |       |         | 2.2E-04             | K.FDLMYSK.R + Oxidation (M)     |                   |
|            |                                              |                                           |       |       |         | 1.7E-06             | K.DVNAAVATIK.T                  |                   |
|            |                                              |                                           |       |       |         | 6.3E-04             | K.EDAANNYAR.G                   |                   |
|            |                                              |                                           |       |       |         | 4.3E-01             | K.EIVDLCLDR.I                   |                   |
|            |                                              |                                           |       |       |         | 1.8E-05             | K.DVNAAVATIKTK.R                |                   |
|            |                                              |                                           |       |       |         | 8.4E-05             | R.IDHKFDLMYSK.R                 |                   |
|            |                                              |                                           |       |       |         | 4.8E-05             | R.QLFHPEQLISGK.E                |                   |
|            |                                              |                                           |       |       |         | 1.3E-02             | R.IDHKFDLMYSK.R + Oxidation (M) |                   |
|            |                                              |                                           |       |       |         | 8.7E-11             | R.LIGQVVSALTASLR.F              |                   |
|            |                                              |                                           |       |       |         | 4.8E-06             | R.TIQFVDWSPTGFK.C               |                   |
|            |                                              |                                           |       |       |         | 1.1E-03             | R.GDVVPKDVNAAVATIK.T            |                   |
|            |                                              |                                           |       |       |         | 5.8E-04             | K.RTIQFVDWSPTGFK.C              |                   |
|            |                                              |                                           |       |       |         | 6.7E-07             | R.AVFLDLEPTVVDEIR.T             |                   |
|            |                                              |                                           |       |       |         | 4.5E-04             | R.NLDIERPTYTNLNR.L              |                   |
|            |                                              |                                           |       |       |         | 1.1E-08             | R.IHFVLTSYAPVISAEEK.A           |                   |
|            |                                              |                                           |       |       |         | 1.8E-01             | R.RNLDIERPTYTNLNR.L             |                   |
|            |                                              |                                           |       |       |         | 1.2E-08             | K.TIGVEDDAFNTEFFSETGAGK.H       |                   |
| 3.0E-05    | R.AFVHWYVVGEGMEEGEFSEAR.E                    |                                           |       |       |         |                     |                                 |                   |
| 8.6E-06    | R.AFVHWYVVGEGMEEGEFSEAR.E + Oxidation (M)    |                                           |       |       |         |                     |                                 |                   |
| 4.8E-05    | R.QLFHPEQLISGKEDAANNYAR.G                    |                                           |       |       |         |                     |                                 |                   |
| 2.1E-11    | R.FDGALNVDLTEFQTNLVPYPR.I                    |                                           |       |       |         |                     |                                 |                   |
| 3.6E-05    | K.AYHEQLSVSEISNAVFEPASMMTK.C                 |                                           |       |       |         |                     |                                 |                   |
| 1.5E-05    | K.AYHEQLSVSEISNAVFEPASMMTK.C + Oxidation (M) |                                           |       |       |         |                     |                                 |                   |
| EAN95983.1 | ATPase beta subunit, putative                | 55980                                     | 1073  | 23    | 1.7E-03 | K.VIDLKGDSC.K       | 0                               |                   |
|            |                                              |                                           |       |       | 8.0E-04 | K.IGLFGGAGVGK.T     |                                 |                   |

| Spot no.   | Accession no.          | Protein Identity | Mr    | SCORE | # PEPT. | E-value | Mascot Sequence                              | Additional copies |
|------------|------------------------|------------------|-------|-------|---------|---------|----------------------------------------------|-------------------|
| 37 cont.   | EAN95983.1             | cont.            |       |       |         | 7.1E-04 | R.MPIHAVAPK.L + Oxidation (M)                |                   |
|            |                        |                  |       |       |         | 1.0E-06 | K.MAEEAAELEK.L                               |                   |
|            |                        |                  |       |       |         | 3.2E-04 | K.MAEEAAELEK.L + Oxidation (M)               |                   |
|            |                        |                  |       |       |         | 1.1E-04 | K.KMAEEAAELEK.L + Oxidation (M)              |                   |
|            |                        |                  |       |       |         | 7.6E-07 | K.VVSSGGNISVPVGR.E                           |                   |
|            |                        |                  |       |       |         | 6.4E-06 | R.IFNVLGDAIDQR.G                             |                   |
|            |                        |                  |       |       |         | 4.7E-05 | K.GHGGFSVFAGVGER.T                           |                   |
|            |                        |                  |       |       |         | 7.6E-09 | K.TVIIMELINNVAK.G                            |                   |
|            |                        |                  |       |       |         | 3.3E-08 | K.TVIIMELINNVAK.G + Oxidation (M)            |                   |
|            |                        |                  |       |       |         | 4.6E-08 | R.VAQSALTMAEYFR.D                            |                   |
|            |                        |                  |       |       |         | 2.9E-11 | R.FTQANSEVSALLGR.I                           |                   |
|            |                        |                  |       |       |         | 3.7E-06 | R.VAQSALTMAEYFR.D + Oxidation (M)            |                   |
|            |                        |                  |       |       |         | 7.9E-05 | K.SKVVSSGGNISVPVGR.E                         |                   |
|            |                        |                  |       |       |         | 4.7E-04 | R.EGTDLYLEMMQSK.V + Oxidation (M)            |                   |
|            |                        |                  |       |       |         | 4.1E-09 | K.LADQAAEDTILTTGIK.V                         |                   |
|            |                        |                  |       |       |         | 2.6E-03 | R.TREGTDLYLEMMQSK.V + 2 Oxidation (M)        |                   |
|            |                        |                  |       |       |         | 3.1E-04 | R.DEPLTLEIVQHDAHTGR.C                        |                   |
|            |                        |                  |       |       |         | 5.8E-09 | R.IPAAVGYQPTLAEDLGQLQER.I                    |                   |
|            |                        |                  |       |       |         | 4.4E-05 | K.ELQDIIAVLGIDELSEEDKLIVDR.A                 |                   |
|            |                        |                  |       |       |         | 3.7E-02 | R.IMDPDVISVDHYNVAQDVVQMLTK.Y                 |                   |
|            |                        |                  |       |       |         | 4.1E-06 | R.IMDPDVISVDHYNVAQDVVQMLTK.Y + Oxidation (M) |                   |
| EAN94839.1 | beta tubulin, putative |                  | 50520 | 844   | 25      | 4.9E-01 | R.EEYPDR.I                                   | 0                 |
|            |                        |                  |       |       |         | 1.5E-05 | K.NMMQAADPR.H                                |                   |
|            |                        |                  |       |       |         | 1.0E-03 | R.YLTASALFR.G                                |                   |
|            |                        |                  |       |       |         | 2.1E-03 | K.NMMQAADPR.H + 2 Oxidation (M)              |                   |
|            |                        |                  |       |       |         | 5.7E-07 | K.LAVNLVPFPR.L                               |                   |
|            |                        |                  |       |       |         | 1.1E-04 | R.FPGQLNSDLR.K                               |                   |
|            |                        |                  |       |       |         | 1.2E-06 | R.VGEQFTAMFR.R                               |                   |
|            |                        |                  |       |       |         | 2.8E-06 | R.VGEQFTAMFR.R + Oxidation (M)               |                   |
|            |                        |                  |       |       |         | 2.4E-06 | R.KLAVNLVPFPR.L                              |                   |
|            |                        |                  |       |       |         | 3.5E-04 | R.FPGQLNSDLRK.L                              |                   |
|            |                        |                  |       |       |         | 1.3E-07 | R.INVYFDEATGGR.Y                             |                   |
|            |                        |                  |       |       |         | 4.7E-04 | R.RVGEQFTAMFR.R                              |                   |
|            |                        |                  |       |       |         | 1.8E-03 | R.RVGEQFTAMFR.R + Oxidation (M)              |                   |
|            |                        |                  |       |       |         | 3.0E-04 | R.IMMTFSIIPSPK.V                             |                   |
|            |                        |                  |       |       |         | 1.5E-05 | R.IMMTFSIIPSPK.V + Oxidation (M)             |                   |
|            |                        |                  |       |       |         | 6.6E-05 | K.EVDEQMLNVQNK.N                             |                   |
|            |                        |                  |       |       |         | 1.1E-05 | K.EVDEQMLNVQNK.N + Oxidation (M)             |                   |
|            |                        |                  |       |       |         | 9.2E-05 | R.AVLIDLEPGTMDSVR.A                          |                   |

| Spot no.   | Accession no.                                                | Protein Identity | Mr    | SCORE | # PEPT. | E-value | Mascot Sequence                        | Additional copies |
|------------|--------------------------------------------------------------|------------------|-------|-------|---------|---------|----------------------------------------|-------------------|
| 37 cont.   | EAN94839.1                                                   | cont.            |       |       |         | 1.1E-06 | R.AVLIDLEPGTMDSVR.A + Oxidation (M)    |                   |
|            |                                                              |                  |       |       |         | 3.4E-04 | R.GLSVPELTQQMFDAK.N                    |                   |
|            |                                                              |                  |       |       |         | 5.5E-04 | R.LHFFMMGFAPLTSR.G + Oxidation (M)     |                   |
|            |                                                              |                  |       |       |         | 2.0E-05 | R.GLSVPELTQQMFDAK.N + Oxidation (M)    |                   |
|            |                                                              |                  |       |       |         | 1.6E-05 | R.LHFFMMGFAPLTSR.G + 2 Oxidation (M)   |                   |
|            |                                                              |                  |       |       |         | 5.4E-04 | K.NSSYFIEWIPNNIK.S                     |                   |
|            |                                                              |                  |       |       |         | 2.5E-07 | K.FWEVISDEHGVDPGTGYQGSDQLER.I          |                   |
| EAN97657.1 | chaperonin HSP60, mitochondrial precursor                    |                  | 59413 | 787   | 14      | 9.9E-04 | K.APGFGDNK.T                           | 0                 |
|            |                                                              |                  |       |       |         | 1.4E-03 | K.EGAVVVEK.V                           |                   |
|            |                                                              |                  |       |       |         | 1.4E-05 | K.LSGGVAVIK.V                          |                   |
|            |                                                              |                  |       |       |         | 5.2E-03 | R.LIGQAMEK.V + Oxidation (M)           |                   |
|            |                                                              |                  |       |       |         | 7.8E-04 | K.DGVITTQDGK.T                         |                   |
|            |                                                              |                  |       |       |         | 8.2E-08 | K.VGGGSEVEVNEK.K                       |                   |
|            |                                                              |                  |       |       |         | 3.9E-07 | R.GLIDGETSDYNR.E                       |                   |
|            |                                                              |                  |       |       |         | 1.3E-05 | R.GYISPYFVTDK.A                        |                   |
|            |                                                              |                  |       |       |         | 1.4E-07 | K.AELEDAFVLVSAK.K                      |                   |
|            |                                                              |                  |       |       |         | 3.6E-08 | R.AVGVILQSVAEQSR.K                     |                   |
|            |                                                              |                  |       |       |         | 4.8E-06 | R.AAVQEGIVPGGGVALLR.A                  |                   |
|            |                                                              |                  |       |       |         | 1.3E-08 | K.ALDSLLGDSSLTADQR.T                   |                   |
|            |                                                              |                  |       |       |         | 6.1E-07 | K.VLENNDVTVG YDAQR.D                   |                   |
|            |                                                              |                  |       |       |         | 6.3E-06 | K.VSSIHTILPALNHVVR.T                   |                   |
| EAN84370.1 | heat shock 70 kDa protein, mitochondrial precursor, putative |                  | 71585 | 566   | 12      | 1.0E-01 | R.TLLAELR.K                            | 0                 |
|            |                                                              |                  |       |       |         | 6.3E-03 | R.SKFEFLAEK.L                          |                   |
|            |                                                              |                  |       |       |         | 2.8E-05 | K.DAGTIAGLNVIR.V                       |                   |
|            |                                                              |                  |       |       |         | 1.5E-05 | K.YVSDAEKENVR.T                        |                   |
|            |                                                              |                  |       |       |         | 5.9E-06 | R.NNAETQANTAER.Q                       |                   |
|            |                                                              |                  |       |       |         | 2.5E-06 | K.EISEVVLVGGMTR.M                      |                   |
|            |                                                              |                  |       |       |         | 1.3E-06 | K.TQNITITASGGLSK.E                     |                   |
|            |                                                              |                  |       |       |         | 2.1E-05 | K.EISEVVLVGGMTR.M + Oxidation (M)      |                   |
|            |                                                              |                  |       |       |         | 9.6E-08 | K.SQTFSTAADNQTQVGK.V                   |                   |
|            |                                                              |                  |       |       |         | 1.8E-10 | R.GVNPDEAVALGAATLGGVLR.G               |                   |
|            |                                                              |                  |       |       |         | 4.1E-03 | K.KSQTFSTAADNQTQVGK.V                  |                   |
|            |                                                              |                  |       |       |         | 5.3E-04 | K.SMENPNVTKDELSAATDK.L + Oxidation (M) |                   |
| EAN94132.1 | hypothetical protein, conserved                              |                  | 44487 | 300   | 9       | 7.3E-04 | K.WTLLYER.Y                            | 0                 |
|            |                                                              |                  |       |       |         | 6.3E-04 | R.YFVAEVPDVR.V                         |                   |
|            |                                                              |                  |       |       |         | 2.2E-04 | R.FDLLTNSFVYK.W                        |                   |
|            |                                                              |                  |       |       |         | 2.6E-04 | R.VEGPQVPTQYMR.N                       |                   |
|            |                                                              |                  |       |       |         | 2.8E-01 | R.EMRPPDIPISLK.L + Oxidation (M)       |                   |

| Spot no.   | Accession no.                                        | Protein Identity                       | Mr    | SCORE | # PEPT. | E-value                              | Mascot Sequence                    | Additional copies |
|------------|------------------------------------------------------|----------------------------------------|-------|-------|---------|--------------------------------------|------------------------------------|-------------------|
| 37 cont.   | EAN94132.1                                           | cont.                                  |       |       |         | 5.3E-02                              | R.VEGQVVPVPTQYMR.N + Oxidation (M) |                   |
|            |                                                      |                                        |       |       |         | 6.9E-07                              | R.SGDSSAFLSDDEALR.G                |                   |
|            |                                                      |                                        |       |       |         | 4.5E-07                              | K.LMETAIQQDPVYVR.L                 |                   |
|            |                                                      |                                        |       |       |         | 1.6E-06                              | K.LMETAIQQDPVYVR.L + Oxidation (M) |                   |
| EAN99322.1 | protein disulfide isomerase, putative                | 54011                                  | 178   | 6     | 9.1E-05 | K.SSDIVNYVK.A                        |                                    | 0                 |
|            |                                                      |                                        |       |       | 1.8E-02 | K.FIIEYSEK.K                         |                                    |                   |
|            |                                                      |                                        |       |       | 1.0E-04 | K.GFPTILFR.D                         |                                    |                   |
|            |                                                      |                                        |       |       | 3.5E-01 | K.DVPIPEEVKR.E                       |                                    |                   |
|            |                                                      |                                        |       |       | 5.5E-06 | K.EVFDGAMETADLK.S + Oxidation (M)    |                                    |                   |
|            |                                                      |                                        |       |       | 4.0E-02 | K.ANLGTAVVHVETAEELEK.L               |                                    |                   |
| EAN89640.1 | Hsc70-interacting protein (Hip), putative            | 48275                                  | 149   | 3     | 5.7E-04 | R.ALDLNPENVR.A                       |                                    | 1                 |
|            |                                                      |                                        |       |       | 2.4E-07 | R.VLSGVELEAVNR.V                     |                                    |                   |
|            |                                                      |                                        |       |       | 6.8E-05 | R.SNPMAALQMMGDPK.V + 3 Oxidation (M) |                                    |                   |
| EAN90182.1 | intraflagellar transport protein component, putative | 72460                                  | 73    | 2     | 9.0E-03 | R.ALLDYVFR.Q                         |                                    | 1                 |
|            |                                                      |                                        |       |       | 1.2E-05 | R.VAVEQQEELPR.D                      |                                    |                   |
| EAN87966.1 | glucose-regulated protein 78, putative               | 71414                                  | 63    | 2     | 1.4E-02 | K.KEEITITNDK.G                       |                                    | 0                 |
|            |                                                      |                                        |       |       | 1.9E-04 | K.LQSVTNPIIQK.V                      |                                    |                   |
| EAN83974.1 | paraflagellar rod component Par4, putative           | 68470                                  | 58    | 2     | 4.0E-02 | R.TIISLQQK.L                         |                                    | 0                 |
|            |                                                      |                                        |       |       | 2.5E-04 | K.AIQETEATQTAK.I                     |                                    |                   |
| EAN88605.1 | acetylornithine deacetylase-like, putative           | 44189                                  | 43    | 1     | 1.9E-04 | R.ALAQLTGS AVGSRL                    |                                    | 0                 |
| EAN88008.1 | hypothetical protein, conserved                      | 110934                                 | 40    | 1     | 2.9E-04 | K.QEKILLER.V                         |                                    | 0                 |
| EAN81557.1 | serine carboxypeptidase (CBP1), putative             | 60759                                  | 27    | 1     | 8.2E-03 | R.EDVQSSLGAK.R                       |                                    | 2                 |
| EAN89795.1 | pyruvate dehydrogenase E1 beta subunit, putative     | 38411                                  | 26    | 1     | 7.0E-03 | K.EGIEAEVINLR.S                      |                                    | 1                 |
| EAN84330.1 | mucin-associated surface protein (MASP), putative    | 44673                                  | 23    | 1     | 1.8E-02 | K.VAISLPSR.M                         |                                    | 1                 |
| EAN83367.1 | hypothetical protein, conserved                      | 119453                                 | 22    | 1     | 2.1E-02 | K.TLQVYDAVAR.V                       |                                    | 1                 |
| EAN89431.1 | hypothetical protein, conserved                      | 92676                                  | 17    | 1     | 3.6E-02 | K.SEGADAAPMQAPPSVK.D + Oxidation (M) |                                    | 0                 |
| Spot 38    | EAN87966.1                                           | glucose-regulated protein 78, putative | 71414 | 2323  | 55      | 7.4E-03                              | R.NTQIPTK.K                        | 0                 |
|            |                                                      |                                        |       |       | 4.8E-03 | K.VQVEVGGK.K                         |                                    |                   |
|            |                                                      |                                        |       |       | 7.7E-04 | K.GTLVPVQR.V                         |                                    |                   |
|            |                                                      |                                        |       |       | 6.0E-04 | R.YFVDMLK.K                          |                                    |                   |
|            |                                                      |                                        |       |       | 1.5E-03 | R.YFVDMLK.K + Oxidation (M)          |                                    |                   |
|            |                                                      |                                        |       |       | 1.6E-06 | R.LSEEEIER.M                         |                                    |                   |
|            |                                                      |                                        |       |       | 3.0E-02 | R.YFVDMLKK.K                         |                                    |                   |
|            |                                                      |                                        |       |       | 2.6E-02 | R.YFVDMLKK.K + Oxidation (M)         |                                    |                   |
|            |                                                      |                                        |       |       | 5.6E-03 | K.EEITITNDK.G                        |                                    |                   |



| Spot no. | Accession no. | Protein Identity | Mr | SCORE | # PEPT. | E-value | Mascot Sequence                     | Additional copies |
|----------|---------------|------------------|----|-------|---------|---------|-------------------------------------|-------------------|
| 38 cont. | EAN87966.1    | cont.            |    |       |         | 7.2E-07 | K.YSDATVQTDK.K                      |                   |
|          |               |                  |    |       |         | 7.2E-07 | K.LLSYEVVADK.D                      |                   |
|          |               |                  |    |       |         | 7.3E-05 | K.EIAETYLGEK.V                      |                   |
|          |               |                  |    |       |         | 8.4E-05 | R.DFFGGKEPNR.G                      |                   |
|          |               |                  |    |       |         | 1.2E-05 | K.FELSGIPPAPR.G                     |                   |
|          |               |                  |    |       |         | 1.2E-05 | K.DAGTIAGLNVVR.I                    |                   |
|          |               |                  |    |       |         | 9.4E-05 | K.KEEITITNDK.G                      |                   |
|          |               |                  |    |       |         | 2.8E-08 | R.EAAEFEDEDK.K                      |                   |
|          |               |                  |    |       |         | 3.4E-05 | R.NSLESVAYSLR.N                     |                   |
|          |               |                  |    |       |         | 2.9E-04 | K.LQSVTNPIIQK.V                     |                   |
|          |               |                  |    |       |         | 3.9E-05 | K.YSDATVQTDKK.L                     |                   |
|          |               |                  |    |       |         | 2.6E-07 | K.KLLSYEVVADK.D                     |                   |
|          |               |                  |    |       |         | 3.6E-05 | K.EEITITNDKGR.L                     |                   |
|          |               |                  |    |       |         | 2.5E-06 | K.FEELNMELFK.G                      |                   |
|          |               |                  |    |       |         | 9.0E-06 | K.FEELNMELFK.G + Oxidation (M)      |                   |
|          |               |                  |    |       |         | 1.7E-05 | R.EAAEFEDEDK.V                      |                   |
|          |               |                  |    |       |         | 1.1E-07 | K.LSADDKSAVEAAVK.E                  |                   |
|          |               |                  |    |       |         | 3.3E-05 | K.MKEIAETYLGEK.V                    |                   |
|          |               |                  |    |       |         | 1.5E-05 | K.MKEIAETYLGEK.V + Oxidation (M)    |                   |
|          |               |                  |    |       |         | 6.1E-04 | K.GDVHIIPNDMGNR.I                   |                   |
|          |               |                  |    |       |         | 3.9E-08 | R.ITPSVVAFTETER.L                   |                   |
|          |               |                  |    |       |         | 1.6E-03 | K.GDVHIIPNDMGNR.I + Oxidation (M)   |                   |
|          |               |                  |    |       |         | 3.1E-05 | K.SDIHEIVLVGGSTR.V                  |                   |
|          |               |                  |    |       |         | 5.6E-05 | R.DKLQSVTNPIIQK.V                   |                   |
|          |               |                  |    |       |         | 5.3E-07 | R.AKFEELNMELFK.G                    |                   |
|          |               |                  |    |       |         | 5.4E-04 | R.AKFEELNMELFK.G                    |                   |
|          |               |                  |    |       |         | 4.4E-04 | R.AKFEELNMELFK.G + Oxidation (M)    |                   |
|          |               |                  |    |       |         | 1.7E-06 | K.QFTPEEVSAMVLQK.M                  |                   |
|          |               |                  |    |       |         | 2.3E-07 | K.KSDIHEIVLVGGSTR.V                 |                   |
|          |               |                  |    |       |         | 2.4E-04 | K.QFTPEEVSAMVLQK.M + Oxidation (M)  |                   |
|          |               |                  |    |       |         | 1.2E-08 | R.IINEPTAAAIA YGLNK.A               |                   |
|          |               |                  |    |       |         | 2.6E-07 | K.LLSYEVVADKDGKPK.V                 |                   |
|          |               |                  |    |       |         | 1.1E-07 | K.NAVVTVPAYFNDAQR.Q                 |                   |
|          |               |                  |    |       |         | 3.3E-08 | R.VEVDSLTEGDFSEK.I                  |                   |
|          |               |                  |    |       |         | 6.0E-05 | K.KQFTPEEVSAMVLQK.M                 |                   |
|          |               |                  |    |       |         | 4.3E-05 | K.KQFTPEEVSAMVLQK.M + Oxidation (M) |                   |
|          |               |                  |    |       |         | 2.8E-04 | K.NQLPQNPHNTIYAIK.R                 |                   |
|          |               |                  |    |       |         | 8.1E-07 | K.VYQSGGGADGDERPEPMDDL.-            |                   |

| Spot no.   | Accession no.                           | Protein Identity | Mr    | SCORE | # PEPT. | E-value | Mascot Sequence                            | Additional copies |
|------------|-----------------------------------------|------------------|-------|-------|---------|---------|--------------------------------------------|-------------------|
| 38 cont.   | EAN87966.1                              | cont.            |       |       |         | 2.5E-05 | K.VYQSGGGADGDERPEPMDDL.- + Oxidation (M)   |                   |
|            |                                         |                  |       |       |         | 2.7E-10 | R.VVLVDVIPLSLGIETVGGVMTK.L                 |                   |
|            |                                         |                  |       |       |         | 6.9E-11 | R.VVLVDVIPLSLGIETVGGVMTK.L + Oxidation (M) |                   |
|            |                                         |                  |       |       |         | 2.5E-04 | K.EAMQFLDDNPNADKEEYDEAR.D                  |                   |
|            |                                         |                  |       |       |         | 8.4E-05 | K.EAMQFLDDNPNADKEEYDEAR.D + Oxidation (M)  |                   |
|            |                                         |                  |       |       |         | 1.1E-06 | K.SQVFSTYQDNQPGVLIQVYEGER.Q                |                   |
|            |                                         |                  |       |       |         | 1.9E-06 | R.GINPDEAVAYGAAVQAAVLTGESEVGG.R.V          |                   |
|            |                                         |                  |       |       |         | 4.3E-04 | K.KSQVFSTYQDNQPGVLIQVYEGER.Q               |                   |
| EAN95887.1 | heat shock protein 70 (HSP70), putative |                  | 73607 | 1070  | 31      | 4.0E-01 | K.DLTTSQR.A                                | 1                 |
|            |                                         |                  |       |       |         | 1.7E-03 | R.GTLQPVER.V                               |                   |
|            |                                         |                  |       |       |         | 1.8E-03 | K.EIAESYLKQ                                |                   |
|            |                                         |                  |       |       |         | 6.0E-03 | R.NQIVITNDK.G                              |                   |
|            |                                         |                  |       |       |         | 7.6E-04 | K.NTVNEPNVAGK.I                            |                   |
|            |                                         |                  |       |       |         | 1.3E-02 | K.RNQIVITNDK.G                             |                   |
|            |                                         |                  |       |       |         | 8.2E-04 | R.LVSHFTDEFK.R                             |                   |
|            |                                         |                  |       |       |         | 1.1E-06 | K.DAGTIAGMEVLR.I                           |                   |
|            |                                         |                  |       |       |         | 7.6E-05 | K.DAGTIAGMEVLR.I + Oxidation (M)           |                   |
|            |                                         |                  |       |       |         | 1.3E-05 | K.FSDPVVQSDMK.H                            |                   |
|            |                                         |                  |       |       |         | 6.1E-05 | R.NQIVITNDKGR.L                            |                   |
|            |                                         |                  |       |       |         | 6.1E-06 | K.FSDPVVQSDMK.H + Oxidation (M)            |                   |
|            |                                         |                  |       |       |         | 1.2E-04 | K.MKEIAESYLKQ                              |                   |
|            |                                         |                  |       |       |         | 4.2E-05 | K.MKEIAESYLKQ + Oxidation (M)              |                   |
|            |                                         |                  |       |       |         | 8.3E-06 | K.NGLENYAFSMK.N + Oxidation (M)            |                   |
|            |                                         |                  |       |       |         | 1.3E-05 | R.AVHDVVLVGGSTR.I                          |                   |
|            |                                         |                  |       |       |         | 4.3E-07 | K.VMQLVSDFFGGK.E                           |                   |
|            |                                         |                  |       |       |         | 3.0E-04 | K.VMQLVSDFFGGK.E + Oxidation (M)           |                   |
|            |                                         |                  |       |       |         | 1.1E-04 | R.KFSDPVVQSDMK.H                           |                   |
|            |                                         |                  |       |       |         | 3.4E-04 | K.GDDKPVIQVQFR.G                           |                   |
|            |                                         |                  |       |       |         | 3.5E-05 | R.TPSYVAFTDTER.L                           |                   |
|            |                                         |                  |       |       |         | 3.7E-02 | K.AVVTVPAYFNDSQR.Q                         |                   |
|            |                                         |                  |       |       |         | 7.3E-07 | K.TFNPEEVSSMVLK.M                          |                   |
|            |                                         |                  |       |       |         | 1.6E-05 | K.TFNPEEVSSMVLK.M + Oxidation (M)          |                   |
|            |                                         |                  |       |       |         | 3.1E-06 | K.NQVAMNPTNTVFDAK.R                        |                   |
|            |                                         |                  |       |       |         | 3.3E-04 | R.IINEPTAAAIAYGLDK.V                       |                   |
|            |                                         |                  |       |       |         | 6.0E-09 | K.NQVAMNPTNTVFDAK.R + Oxidation (M)        |                   |

| Spot no. | Accession no. | Protein Identity                           | Mr    | SCORE | # PEPT. | E-value | Mascot Sequence                       | Additional copies |
|----------|---------------|--------------------------------------------|-------|-------|---------|---------|---------------------------------------|-------------------|
| 38 cont. | EAN95887.1    | cont.                                      |       |       |         | 1.5E-04 | K.KAVVTVPAYFNDSQR.Q                   |                   |
|          |               |                                            |       |       |         | 4.3E-05 | K.ATNGDTHLGGEDFDNR.L                  |                   |
|          |               |                                            |       |       |         | 3.2E-02 | R.IINEPTAAAIAAYGLDKVEDGK.E            |                   |
|          |               |                                            |       |       |         | 3.7E-03 | K.SQIFSTYADNQPVGVIHQVFEGER.A          |                   |
|          | EAN95886.1    | heat shock protein 70 (HSP70), putative    | 71171 | 1053  | 30      | 3.4E-05 | R.VEIIANDQGNR.T                       | 0                 |
|          | EAN99876.1    | paraflagellar rod component, putative      | 69022 | 788   | 18      | 1.2E-03 | R.DATDSISR.F                          | 0                 |
|          |               |                                            |       |       |         | 2.6E-04 | R.IPQQNLR.Q                           |                   |
|          |               |                                            |       |       |         | 4.4E-07 | R.GSELLAASK.E                         |                   |
|          |               |                                            |       |       |         | 7.4E-04 | K.EMVEAQVR.A                          |                   |
|          |               |                                            |       |       |         | 1.8E-02 | K.EMVEAQVR.A + Oxidation (M)          |                   |
|          |               |                                            |       |       |         | 6.7E-05 | R.SYVDEMVT.R.I                        |                   |
|          |               |                                            |       |       |         | 1.3E-03 | R.SYVDEMVT.R.I + Oxidation (M)        |                   |
|          |               |                                            |       |       |         | 3.8E-06 | R.AELSELDGER.D                        |                   |
|          |               |                                            |       |       |         | 2.5E-04 | K.LKDAIHL.YER.A                       |                   |
|          |               |                                            |       |       |         | 5.7E-06 | R.AELSELDGERDK.V                      |                   |
|          |               |                                            |       |       |         | 4.2E-05 | R.LELDDIIEQMK.G + Oxidation (M)       |                   |
|          |               |                                            |       |       |         | 3.6E-06 | R.ETAAQIGQIVEQK.K                     |                   |
|          |               |                                            |       |       |         | 1.5E-10 | R.QAVEEDEAATESAIR.N                   |                   |
|          |               |                                            |       |       |         | 7.2E-03 | R.SGTPFVHPLQEYGIK.S                   |                   |
|          |               |                                            |       |       |         | 1.2E-07 | R.DSAMESLDPNMSNYR.L + 2 Oxidation (M) |                   |
|          |               |                                            |       |       |         | 3.6E-07 | R.VTAYNEFVNMEEQQK.H                   |                   |
|          |               |                                            |       |       |         | 2.5E-05 | R.VTAYNEFVNMEEQQK.H + Oxidation (M)   |                   |
|          |               |                                            |       |       |         | 1.3E-04 | K.GVSGVINALNATQDAGEQLFQSVEK.G         |                   |
|          | EAN83974.1    | paraflagellar rod component Par4, putative | 68470 | 770   | 15      | 2.3E-04 | R.TIISQLQOK.L                         | 0                 |
|          |               |                                            |       |       |         | 9.1E-05 | R.SLQEVVETR.E                         |                   |
|          |               |                                            |       |       |         | 1.3E-02 | K.EEVLQLET.K.C                        |                   |
|          |               |                                            |       |       |         | 2.6E-06 | R.SDSAYLAAELR.A                       |                   |
|          |               |                                            |       |       |         | 4.1E-04 | R.DSLLNEVSLLR.V                       |                   |
|          |               |                                            |       |       |         | 2.0E-07 | K.AIQETEATQTAK.I                      |                   |
|          |               |                                            |       |       |         | 4.9E-05 | R.EAQLLSEVAVLK.A                      |                   |
|          |               |                                            |       |       |         | 8.2E-04 | R.EYQQQIEQVR.S                        |                   |
|          |               |                                            |       |       |         | 2.7E-06 | K.ITFLNAQVSNNR.T                      |                   |
|          |               |                                            |       |       |         | 8.4E-07 | R.IANQEEVIEALR.E                      |                   |
|          |               |                                            |       |       |         | 1.1E-05 | R.EQLALENETQLK.A                      |                   |
|          |               |                                            |       |       |         | 2.6E-06 | K.VEQLTTSLHDER.V                      |                   |
|          |               |                                            |       |       |         | 1.2E-05 | R.VASEAQVEQLVLMR.D + Oxidation (M)    |                   |
|          |               |                                            |       |       |         | 2.3E-06 | K.QLYALESEAEELQK.R                    |                   |

| Spot no. | Accession no. | Protein Identity                                             | Mr    | SCORE | # PEPT. | E-value | Mascot Sequence                         | Additional copies |
|----------|---------------|--------------------------------------------------------------|-------|-------|---------|---------|-----------------------------------------|-------------------|
| 38 cont. | EAN83974.1    | cont.                                                        |       |       |         | 6.8E-05 | K.ATTFHVQATALQDTQR.N                    |                   |
|          | EAN81053.1    | alpha tubulin, putative                                      | 50549 | 606   | 13      | 5.6E-05 | K.DVNAAVATIK.T                          | 0                 |
|          |               |                                                              |       |       |         | 1.1E-04 | K.EDAANNYAR.G                           |                   |
|          |               |                                                              |       |       |         | 6.4E-05 | R.IDHKFDLMYSK.R                         |                   |
|          |               |                                                              |       |       |         | 1.3E-03 | R.QLFHPEQLISGK.E                        |                   |
|          |               |                                                              |       |       |         | 6.1E-02 | R.IDHKFDLMYSK.R + Oxidation (M)         |                   |
|          |               |                                                              |       |       |         | 6.3E-09 | R.LIGQVVSALTASLR.F                      |                   |
|          |               |                                                              |       |       |         | 2.8E-07 | R.TIQFVDWSPTGFK.C                       |                   |
|          |               |                                                              |       |       |         | 8.6E-06 | R.AVFLDLEPTVVDEIR.T                     |                   |
|          |               |                                                              |       |       |         | 7.6E-03 | R.NLDIERPTYTNLNR.L                      |                   |
|          |               |                                                              |       |       |         | 4.1E-07 | R.IHFVLTSYAPVISA EK.A                   |                   |
|          |               |                                                              |       |       |         | 1.5E-07 | K.TIGVEDDAFNTEFFSETGAGK.H               |                   |
|          |               |                                                              |       |       |         | 8.5E-02 | R.FDGALNVDLTEFQTNLVPYPR.I               |                   |
|          |               |                                                              |       |       |         | 1.0E-05 | K.AYHEQLSVSEISNAVFEPASMMTK.C + 2 Oxidat |                   |
|          | EAN84370.1    | heat shock 70 kDa protein, mitochondrial precursor, putative | 71585 | 594   | 13      | 9.5E-04 | R.TLLAELR.K                             | 0                 |
|          |               |                                                              |       |       |         | 1.6E+00 | R.TTPSVVAFK.G                           |                   |
|          |               |                                                              |       |       |         | 5.8E-02 | R.SKFE SLAEK.L                          |                   |
|          |               |                                                              |       |       |         | 6.7E-06 | R.VLENTEGFR.T                           |                   |
|          |               |                                                              |       |       |         | 5.9E-05 | K.STGIDLSNER.M                          |                   |
|          |               |                                                              |       |       |         | 5.3E-05 | K.DAGTIAGLNVIR.V                        |                   |
|          |               |                                                              |       |       |         | 3.0E-04 | K.YVSDAEKENVR.T                         |                   |
|          |               |                                                              |       |       |         | 3.7E-06 | R.NNAETQANTAER.Q                        |                   |
|          |               |                                                              |       |       |         | 9.7E-07 | K.TQNITITASGGLSK.E                      |                   |
|          |               |                                                              |       |       |         | 4.3E-06 | K.EISEVVLVGGMTR.M + Oxidation (M)       |                   |
|          |               |                                                              |       |       |         | 3.1E-06 | R.QAITNPQSTFFAVK.R                      |                   |
|          |               |                                                              |       |       |         | 2.2E-06 | K.SQTFSTAADNQTQVGIK.V                   |                   |
|          |               |                                                              |       |       |         | 2.0E-04 | R.GVNPDEAVALGAATLGGVLR.G                |                   |
|          | EAN94839.1    | beta tubulin, putative                                       | 50520 | 483   | 15      | 2.0E-02 | R.YLTASALFR.G                           | 0                 |
|          |               |                                                              |       |       |         | 1.6E-02 | K.NMMQAADPR.H + Oxidation (M)           |                   |
|          |               |                                                              |       |       |         | 2.0E-01 | K.LREEYPDR.I                            |                   |
|          |               |                                                              |       |       |         | 2.8E-05 | K.LAVNLVPFPR.L                          |                   |
|          |               |                                                              |       |       |         | 6.4E-03 | R.FPQQLNSDLR.K                          |                   |
|          |               |                                                              |       |       |         | 2.8E-06 | R.VGEQFTAMFR.R + Oxidation (M)          |                   |
|          |               |                                                              |       |       |         | 1.1E-07 | R.INVYFDEATGGR.Y                        |                   |
|          |               |                                                              |       |       |         | 7.7E-04 | R.IMMTFSIIPSPK.V + 2 Oxidation (M)      |                   |
|          |               |                                                              |       |       |         | 7.5E-05 | K.EVDEQMLNVQNK.N                        |                   |
|          |               |                                                              |       |       |         | 5.6E-05 | K.EVDEQMLNVQNK.N + Oxidation (M)        |                   |
|          |               |                                                              |       |       |         | 3.0E-06 | R.AVLIDLEPGTMDSVR.A                     |                   |

| Spot no.   | Accession no. | Protein Identity                                                       | Mr    | SCORE | # PEPT. | E-value | Mascot Sequence                     | Additional copies |
|------------|---------------|------------------------------------------------------------------------|-------|-------|---------|---------|-------------------------------------|-------------------|
| 38 cont.   | EAN94839.1    | cont.                                                                  |       |       |         | 1.2E-04 | R.AVLIDLEPGTMDSVR.A + Oxidation (M) |                   |
|            |               |                                                                        |       |       |         | 5.1E-02 | R.GLSVPELTQQMFDK.N                  |                   |
|            |               |                                                                        |       |       |         | 2.1E-04 | R.GLSVPELTQQMFDK.N + Oxidation (M)  |                   |
|            |               |                                                                        |       |       |         | 1.2E-04 | K.NSSYFIEWIPNNIK.S                  |                   |
| EAN97655.1 |               | chaperonin HSP60, mitochondrial precursor, putative                    | 59991 | 454   | 9       | 1.3E-01 | K.EGAVVVEK.V                        | 1                 |
|            |               |                                                                        |       |       |         | 4.1E-03 | R.LIGQAMEK.V + Oxidation (M)        |                   |
|            |               |                                                                        |       |       |         | 2.0E-10 | K.VGGGSEVEVNEK.K                    |                   |
|            |               |                                                                        |       |       |         | 2.9E-02 | R.LPAHTIVLNAGK.E                    |                   |
|            |               |                                                                        |       |       |         | 2.1E-06 | R.NVIIEQSYGAPK.I                    |                   |
|            |               |                                                                        |       |       |         | 1.3E-05 | R.GLIDGETSDYNR.E                    |                   |
|            |               |                                                                        |       |       |         | 1.9E-06 | K.AELEDQFVLSAK.K                    |                   |
|            |               |                                                                        |       |       |         | 3.7E-08 | R.AVGVILQSVAEQSR.K                  |                   |
|            |               |                                                                        |       |       |         | 3.8E-05 | R.AAVQEGIVPGGGVALLR.A               |                   |
| EAN95983.1 |               | ATPase beta subunit, putative                                          | 55980 | 396   | 7       | 6.9E-05 | K.VVSSGGNISVPVGR.E                  | 0                 |
|            |               |                                                                        |       |       |         | 1.1E-07 | R.IFNVLGDAIDQR.G                    |                   |
|            |               |                                                                        |       |       |         | 3.1E-04 | K.TVIIMELINNVAK.G + Oxidation (M)   |                   |
|            |               |                                                                        |       |       |         | 1.6E-03 | R.VAQSAITMAEYFR.D                   |                   |
|            |               |                                                                        |       |       |         | 1.2E-09 | R.FTQANSEVSALLGR.I                  |                   |
|            |               |                                                                        |       |       |         | 9.7E-07 | R.VAQSAITMAEYFR.D + Oxidation (M)   |                   |
|            |               |                                                                        |       |       |         | 2.2E-08 | K.LADQAAEDTILTTGIK.V                |                   |
| EAN83529.1 |               | hypothetical protein, conserved                                        | 93603 | 266   | 7       | 1.2E-02 | R.QQNFTER.L                         | 1                 |
|            |               |                                                                        |       |       |         | 9.3E-07 | K.IVAELGVFR.R                       |                   |
|            |               |                                                                        |       |       |         | 3.0E-05 | R.SSVLVVFGAK.K                      |                   |
|            |               |                                                                        |       |       |         | 1.2E-04 | K.LQEMATDTGK.L                      |                   |
|            |               |                                                                        |       |       |         | 1.8E-05 | K.LQEMATDTGK.L + Oxidation (M)      |                   |
|            |               |                                                                        |       |       |         | 1.7E-05 | R.AVMLALQEDR.V                      |                   |
|            |               |                                                                        |       |       |         | 3.6E-03 | R.EEEEMQELK.T                       |                   |
| EAN84609.1 |               | heat shock 70 kDa protein, putative vacuolar-type proton translocating | 24348 | 205   | 5       | 2.2E-05 | R.TTPSYVAFTETER.L                   | 1                 |
| EAN91609.1 |               | pyrophosphatase 1, putative                                            | 86135 | 143   | 4       | 2.0E-02 | R.NAYLTDEVMR.N                      | 1                 |
|            |               |                                                                        |       |       |         | 9.6E-03 | R.NAYLTDEVMR.N + Oxidation (M)      |                   |
|            |               |                                                                        |       |       |         | 2.2E-05 | K.SVGLAAMDVNEIR.R + 2 Oxidation (M) |                   |
|            |               |                                                                        |       |       |         | 3.8E-07 | R.EITDALDAAGNTTAAIGK.G              |                   |
| EAN89518.1 |               | hypothetical protein, conserved                                        | 68407 | 114   | 3       | 2.2E-03 | K.LFLASIEQR.L                       | 1                 |
|            |               |                                                                        |       |       |         | 1.9E-05 | R.GAGITLVESLR.R                     |                   |
|            |               |                                                                        |       |       |         | 2.8E-03 | R.LAEMAGESLPIER.Y + Oxidation       |                   |
| EAN95112.1 |               | hypothetical protein, conserved                                        | 90858 | 101   | 2       | 1.5E-05 | R.EALSSIEQTLR.L                     | 0                 |
|            |               |                                                                        |       |       |         | 4.4E-05 | K.YLQQVDSANK.N                      |                   |

| Spot no.   | Accession no.                                     | Protein Identity                                     | Mr    | SCORE | # PEPT. | E-value      | Mascot Sequence               | Additional copies |
|------------|---------------------------------------------------|------------------------------------------------------|-------|-------|---------|--------------|-------------------------------|-------------------|
| 38 cont.   | EAN92318.1                                        | 69 kDa paraflagellar rod protein, putative           | 70087 | 69    | 2       | 1.3E+00      | K.SFQETSAIK.D                 | 0                 |
|            |                                                   |                                                      |       |       |         | 5.8E-07      | R.TVSFTGTIDNAIAK.L            |                   |
|            | EAN82629.1                                        | heat shock protein 85, putative                      | 81244 | 64    | 1       | 1.5E-06      | R.GVVVSEDLPLNISR.E            | 1                 |
|            | EAN90182.1                                        | intraflagellar transport protein component, putative | 72460 | 63    | 1       | 8.6E-07      | R.VAVEQQEELPR.D               | 3                 |
|            | EAN82710.1                                        | gamma-glutamyl carboxypeptidase, putative            | 44359 | 55    | 1       | 7.9E-06      | R.DETPSFEGSEEAPITK.L          | 0                 |
|            | EAN87979.1                                        | paraflagellar rod protein 3, putative                | 69189 | 45    | 1       | 8.3E-05      | R.SQLDATQLAQVPTR.T            | 0                 |
|            | EAN85497.1                                        | glutamyl carboxypeptidase, putative                  | 44390 | 37    | 1       | 1.8E-04      | R.DETPSFEGSEEAPFTK.L          | 1                 |
|            | EAN84397.1                                        | hypothetical protein, conserved                      | 69890 | 33    | 1       | 7.2E-04      | R.SVLQPEPLPR.R                | 1                 |
|            | EAN81302.1                                        | hypothetical protein, conserved                      | 20849 | 31    | 1       | 1.8E-03      | K.DLVTSPVTELFVFR.D            | 1                 |
|            | EAN84897.1                                        | hypothetical protein, conserved                      | 62372 | 25    | 1       | 2.9E-02      | R.EERALAR.E                   | 0                 |
| EAN84330.1 | mucin-associated surface protein (MASP), putative | 44673                                                | 21    | 1     | 3.1E-02 | K.VAISLPSR.M | 1                             |                   |
| Spot 39    | EAN90720.1                                        | calreticulin, putative                               | 46396 | 906   | 27      | 1.6E-03      | K.FYADAEK.S                   | 0                 |
|            |                                                   |                                                      |       |       |         | 5.1E-03      | K.GDGDKEDL.-                  |                   |
|            |                                                   |                                                      |       |       |         | 5.2E-04      | K.VMEDMEK.E                   |                   |
|            |                                                   |                                                      |       |       |         | 1.6E-02      | R.IRFPEDK.L                   |                   |
|            |                                                   |                                                      |       |       |         | 3.9E-02      | R.QIPNPAYK.G                  |                   |
|            |                                                   |                                                      |       |       |         | 2.3E-02      | R.EIVDETDK.K                  |                   |
|            |                                                   |                                                      |       |       |         | 1.1E-02      | K.EVLELVEK.T                  |                   |
|            |                                                   |                                                      |       |       |         | 8.9E-04      | K.SLVVSFSVK.H                 |                   |
|            |                                                   |                                                      |       |       |         | 9.4E-02      | K.LLPSMDPEK.F                 |                   |
|            |                                                   |                                                      |       |       |         | 1.9E-03      | K.DIMIGDDLK.E + Oxidation (M) |                   |
|            |                                                   |                                                      |       |       |         | 7.4E-04      | K.LLPSMDPEK.F + Oxidation (M) |                   |
|            |                                                   |                                                      |       |       |         | 7.8E-05      | K.KSLVVSFSVK.H                |                   |
|            |                                                   |                                                      |       |       |         | 2.4E-04      | K.SMEHWTTSK.H                 |                   |
|            |                                                   |                                                      |       |       |         | 3.0E-06      | K.SMEHWTTSK.H + Oxidation (M) |                   |
|            |                                                   |                                                      |       |       |         | 1.5E-04      | K.VMEDMEKEK.R                 |                   |
|            |                                                   |                                                      |       |       |         | 2.1E-03      | K.YWLMFGPDR.C + Oxidation (M) |                   |
|            |                                                   |                                                      |       |       |         | 2.4E-07      | R.DDFGKVEISAGK.F              |                   |
|            |                                                   |                                                      |       |       |         | 1.4E-02      | R.VHIILHYNGENR.E              |                   |
|            |                                                   |                                                      |       |       |         | 1.3E-06      | K.GQLDGDWTLPPR.E              |                   |
|            |                                                   |                                                      |       |       |         | 8.9E-06      | K.AEEEEKDEEELEEK.G            |                   |
| 7.4E-04    | K.IPNPDFVEDSELHK.V                                |                                                      |       |       |         |              |                               |                   |
| 2.4E-01    | K.LLPSMDPEKFHGETK.Y + Oxidation (M)               |                                                      |       |       |         |              |                               |                   |
| 7.9E-05    | R.FYALSTAFPTPITNEK.K                              |                                                      |       |       |         |              |                               |                   |
| 9.5E-05    | R.FYALSTAFPTPITNEK.K                              |                                                      |       |       |         |              |                               |                   |
|            | K.KPEDWDNEPAMIPDADAK.K + Oxidation (M)            |                                                      |       |       |         |              |                               |                   |
| 8.0E-04    | (M)                                               |                                                      |       |       |         |              |                               |                   |

| Spot no. | Accession no. | Protein Identity                                    | Mr    | SCORE | # PEPT. | E-value | Mascot Sequence                                                              | Additional copies |
|----------|---------------|-----------------------------------------------------|-------|-------|---------|---------|------------------------------------------------------------------------------|-------------------|
| 39 cont. | EAN90720.1    | cont.                                               |       |       |         | 2.4E-06 | K.VPEPLTHVIGIDVWQVESGSIFK.D<br>K.KPDDWDDAEDGPWEAPMIPNPK.S +<br>Oxidation (M) |                   |
|          | EAN82340.1    | calreticulin, putative                              | 46419 | 894   | 27      | 3.0E-02 | K.EVLDLVEK.T                                                                 | 0                 |
|          |               |                                                     |       |       |         | 7.7E-03 | K.DIVIGDDLK.E                                                                |                   |
|          |               |                                                     |       |       |         | 5.3E-06 | K.GQLEEDWSLLLPR.E                                                            |                   |
|          |               |                                                     |       |       |         | 3.8E-06 | R.FYALSTAFPTPINNEK.K                                                         |                   |
|          |               |                                                     |       |       |         | 6.7E-04 | R.FYALSTAFPTPINNEK.S                                                         |                   |
|          | EAN87966.1    | glucose-regulated protein 78, putative              | 71414 | 760   | 16      | 1.3E-03 | K.GTLVPVQR.V                                                                 | 0                 |
|          |               |                                                     |       |       |         | 1.7E-05 | R.LSEEEIER.M                                                                 |                   |
|          |               |                                                     |       |       |         | 7.9E-05 | R.DFFGGKEPNR.G                                                               |                   |
|          |               |                                                     |       |       |         | 4.3E-04 | K.FELSGIPPAPR.G                                                              |                   |
|          |               |                                                     |       |       |         | 7.1E-07 | K.DAGTIAGLNVVR.I                                                             |                   |
|          |               |                                                     |       |       |         | 4.2E-04 | K.KEEITITNDK.G                                                               |                   |
|          |               |                                                     |       |       |         | 1.5E-06 | R.EAAEFEDEDR.K                                                               |                   |
|          |               |                                                     |       |       |         | 2.2E-06 | R.NSLESVAYSLR.N                                                              |                   |
|          |               |                                                     |       |       |         | 5.0E-04 | K.LQSVTNPIQK.V                                                               |                   |
|          |               |                                                     |       |       |         | 2.1E-05 | K.LSADDKSAVEAAVK.E                                                           |                   |
|          |               |                                                     |       |       |         | 5.0E-06 | R.ITPSVVAFTETER.L                                                            |                   |
|          |               |                                                     |       |       |         | 6.8E-05 | K.SDIHEIVLVGGSTR.V                                                           |                   |
|          |               |                                                     |       |       |         | 4.9E-08 | R.IINEPTAAAIA YGLNK.A                                                        |                   |
|          |               |                                                     |       |       |         | 2.9E+00 | K.NAVVTVPAYFNDAQR.Q                                                          |                   |
|          |               |                                                     |       |       |         | 5.3E-09 | R.VEVDLSTEGFDFSEK.I                                                          |                   |
|          |               |                                                     |       |       |         | 3.3E-02 | K.NQLPQNPHNTIYAIK.R                                                          |                   |
|          | EAN97657.1    | chaperonin HSP60, mitochondrial precursor, putative | 59413 | 641   | 12      | 3.8E-03 | K.EGAVVVEK.V                                                                 | 0                 |
|          |               |                                                     |       |       |         | 1.4E-04 | K.LSGGVAVIK.V                                                                |                   |
|          |               |                                                     |       |       |         | 7.6E-04 | R.LIGQAMEK.V + Oxidation (M)                                                 |                   |
|          |               |                                                     |       |       |         | 7.4E-04 | K.DGVITTQDGK.T                                                               |                   |
|          |               |                                                     |       |       |         | 8.0E-08 | K.VGGGSEVEVNEK.K                                                             |                   |
|          |               |                                                     |       |       |         | 4.3E-06 | R.LPAHTIVLNAGK.E                                                             |                   |
|          |               |                                                     |       |       |         | 2.3E-05 | R.GLIDGETSDYNR.E                                                             |                   |
|          |               |                                                     |       |       |         | 1.9E-04 | R.GYISPYFVTDK.A                                                              |                   |
|          |               |                                                     |       |       |         | 1.0E-07 | K.AELEDAFVLVSAK.K                                                            |                   |
|          |               |                                                     |       |       |         | 6.6E-06 | K.TAMMQDIAIFAGAR.L + 2 Oxidation (M)                                         |                   |
|          |               |                                                     |       |       |         | 9.8E-07 | R.AAVQEGIVPGGGVALLR.A                                                        |                   |
|          |               |                                                     |       |       |         | 9.0E-09 | K.VLENNDVTGVYDAQR.D                                                          |                   |
|          | EAN94839.1    | beta tubulin, putative                              | 50520 | 562   | 16      | 4.5E-05 | K.NMMQAADPR.H                                                                | 0                 |
|          |               |                                                     |       |       |         | 3.0E-02 | R.YLTASALFR.G                                                                |                   |

| Spot no.   | Accession no.                                      | Protein Identity | Mr    | SCORE | # PEPT. | E-value | Mascot Sequence                     | Additional copies |
|------------|----------------------------------------------------|------------------|-------|-------|---------|---------|-------------------------------------|-------------------|
| 39 cont.   | EAN94839.1                                         | cont.            |       |       |         | 7.9E-05 | K.NMMQAADPR.H + Oxidation (M)       |                   |
|            |                                                    |                  |       |       |         | 7.4E-05 | K.LAVNLVFPFR.L                      |                   |
|            |                                                    |                  |       |       |         | 3.0E-05 | R.FPGQLNSDLR.K                      |                   |
|            |                                                    |                  |       |       |         | 3.2E-05 | R.VGEQFTAMFR.R                      |                   |
|            |                                                    |                  |       |       |         | 1.0E-06 | R.VGEQFTAMFR.R + Oxidation (M)      |                   |
|            |                                                    |                  |       |       |         | 1.0E-01 | R.FPGQLNSDLR.L                      |                   |
|            |                                                    |                  |       |       |         | 9.4E-08 | R.INVYFDEATGGR.Y                    |                   |
|            |                                                    |                  |       |       |         | 8.6E-04 | R.IMMTFSIIPSPK.V + 2 Oxidation (M)  |                   |
|            |                                                    |                  |       |       |         | 4.6E-06 | K.EVDEQMLNVQNK.N                    |                   |
|            |                                                    |                  |       |       |         | 6.1E-05 | K.EVDEQMLNVQNK.N + Oxidation (M)    |                   |
|            |                                                    |                  |       |       |         | 4.9E-07 | R.AVLIDLEPGTMDSVR.A                 |                   |
|            |                                                    |                  |       |       |         | 4.4E-05 | R.AVLIDLEPGTMDSVR.A + Oxidation (M) |                   |
|            |                                                    |                  |       |       |         | 4.8E-05 | R.GLSVPELTQQMFDK.N + Oxidation (M)  |                   |
|            |                                                    |                  |       |       |         | 2.9E-04 | K.NSSYFIEWIPNNIK.S                  |                   |
| EAN81053.1 | alpha tubulin, putative                            |                  | 50549 | 269   | 6       | 3.9E-05 | K.DVNAAVATIK.T                      | 0                 |
|            |                                                    |                  |       |       |         | 4.2E-04 | K.EDAANNYAR.G                       |                   |
|            |                                                    |                  |       |       |         | 4.6E-06 | R.TIQFVDWSPGFK.C                    |                   |
|            |                                                    |                  |       |       |         | 9.2E-08 | R.AVFLDLEPTVVDEIR.T                 |                   |
|            |                                                    |                  |       |       |         | 1.4E-02 | R.NLDIERPTYTNLNR.L                  |                   |
|            |                                                    |                  |       |       |         | 4.9E-03 | R.IHFVLTSYAPVISAEEK.A               |                   |
| EAN88187.1 | hypothetical protein, conserved                    |                  | 43723 | 227   | 5       | 2.4E-04 | R.VAAEASSLK.H                       | 1                 |
|            |                                                    |                  |       |       |         | 6.1E-06 | R.GGAVVAELLR.A                      |                   |
|            |                                                    |                  |       |       |         | 8.2E-05 | R.IGPIGAEIAK.G                      |                   |
|            |                                                    |                  |       |       |         | 2.7E-03 | K.EGLLMNNTIK.R + Oxidation (M)      |                   |
|            |                                                    |                  |       |       |         | 8.4E-06 | R.TVTLLDFGQNK.L                     |                   |
| EAN95983.1 | ATPase beta subunit, putative                      |                  | 55980 | 181   | 3       | 8.6E-06 | R.IFNVLGDAIDQR.G                    | 0                 |
|            |                                                    |                  |       |       |         | 1.5E-05 | R.VAQSALTMAEYFR.D + Oxidation (M)   |                   |
|            |                                                    |                  |       |       |         | 1.1E-07 | K.LADQAAEDTILTTGIK.V                |                   |
| EAN85497.1 | glutamyl carboxypeptidase, putative                |                  | 44390 | 64    | 1       | 3.4E-07 | R.DETPSFEGSEEAPFTK.L                | 1                 |
| EAN81110.1 | calpain-like cysteine peptidase, putative          |                  | 72116 | 55    | 1       | 9.8E-06 | R.EIAALEESMNAR.A + Oxidation        | 2                 |
| EAN82710.1 | gamma-glutamyl carboxypeptidase, putative          |                  | 44359 | 47    | 1       | 4.9E-05 | R.DETPSFEGSEEAPITK.L                | 0                 |
| EAN83379.1 | proteasome regulatory non-ATPase subunit, putative |                  | 37481 | 37    | 1       | 2.3E-04 | R.MSLEEEQQR.Q + Oxidation (M)       | 1                 |
| EAN84330.1 | mucin-associated surface protein (MASP), putative  |                  | 44673 | 21    | 1       | 3.1E-02 | K.VAISLPSR.M                        | 1                 |



| <b>TABLE S6: PROTEIN ISOFORMS</b> |                      |                                              |               |              |                             |                                                                                                                            |                                                                                                                                    |
|-----------------------------------|----------------------|----------------------------------------------|---------------|--------------|-----------------------------|----------------------------------------------------------------------------------------------------------------------------|------------------------------------------------------------------------------------------------------------------------------------|
|                                   |                      |                                              | <b>Mascot</b> |              |                             | <b>Additional gene copies under same match (#)</b>                                                                         |                                                                                                                                    |
| <b>Band / Spot No.</b>            | <b>Accession no.</b> | <b>Protein Identity</b>                      | <b>Mr</b>     | <b>SCORE</b> | <b># PEPT. Sequence (*)</b> |                                                                                                                            |                                                                                                                                    |
| Band 2                            | EAN81533.1           | histone H4, putative                         | 11163         | 609          | 15                          | <b>R.GKILYGYA.-</b><br><b>K.SFVEGVVR.D</b><br><b>R.ISGVIYDEVR.G</b><br><b>K.RISGVIYDEVR.G</b><br><b>R.ISGVIYDEVRGVIK.S</b> | EAN81534.1; EAN81535.1;<br>EAN81536.1; EAN81537.1;<br>EAN88987.1; EAN89000.1;<br>EAN89001.1; EAN90974.1;<br>EAN90975.1; EAN90976.1 |
|                                   | EAN85055.1           | histone H4, putative                         | 11177         | 608          | 15                          | <b>R.ISGHIYDEVR.G</b><br><b>K.RISGHIYDEVR.G</b><br><b>R.ISGHIYDEVRGVIK.S</b>                                               | EAN85056.1<br>EAN85057.1<br>EAN85058.1<br>EAN90629.1<br>EAN90630.1<br>EAN90631.1                                                   |
|                                   | EAN81454.1           | histone H4, putative                         | 11280         | 429          | 18                          | <b>K.FVEGVVR.D</b><br><b>R.GKILYGYE.-</b><br>R.ISGVMYDEVR.G + Oxidation<br><b>R.ISGVMYDEVR.G</b>                           | EAN94076.1                                                                                                                         |
| Band 4                            | EAN85330.1           | histone H2A, putative                        | 14385         | 283          | 10                          | <b>R.HDDDLGMLLK.D</b><br><b>R.HDDDLGMLLKDVTLR.G</b>                                                                        | EAN91807.1; EAN91809.1;<br>EAN91855.1; EAN91869.1;<br>EAN97510.1; EAN97511.1;<br>EAN97526.1; EAN97527.1;<br>EAN97528.1             |
|                                   | EAN88264.1           | histone H2A, putative                        | 14345         | 238          | 6                           | <b>R.HDDDLGTLK.D</b><br><b>R.HDDDLGTLKDVTLR.G</b>                                                                          | EAN88265.1<br>EAN88266.1<br>EAN88267.1                                                                                             |
| Band 4                            | EAN85210.1           | kinetoplast DNA-associated protein, putative | 14529         | 53           | 1                           | <b>K.NNPALSGLPVAK.R</b>                                                                                                    | EAN87062.1                                                                                                                         |
|                                   | EAN85212.1           | kinetoplast DNA-associated protein, putative | 14224         | 36           | 1                           | <b>K.NNPALSGLPISER.G</b>                                                                                                   | EAN87060.1                                                                                                                         |
| Band 5                            | EAN87059.1           | hypothetical protein, conserved              | 21263         | 77           | 3                           | <b>K.KAAALYVR.F</b><br><b>R.FYHALKK.S</b><br><b>K.SVGLTAALSPK.Q</b>                                                        |                                                                                                                                    |
|                                   | EAN85214.1           | hypothetical protein, conserved              | 21287         | 68           | 3                           | <b>R.FYALKK.S</b><br><b>K.SVGLTAALSPR.Q</b>                                                                                |                                                                                                                                    |
| Band 5                            | EAN99158.1           | hypothetical protein, conserved              | 17771         | 67           | 2                           | <b>R.LGIGFDDR.R</b><br>R.NALDLGDDRR.D                                                                                      |                                                                                                                                    |
|                                   | EAN95668.1           | hypothetical protein, conserved              | 17874         | 49           | 2                           | R.LGLDFDDR.G                                                                                                               |                                                                                                                                    |

(\*) In **bold** are shown the peptides shared between the isoforms, that carry the sequence difference. In *italics* are the peptides present in one isoform but it does not match to the others. (#) In additional gene copies, we list the other genomic versions that match to the specific isoform. It shows how represented it is each protein group in the genome.

| <b>Band / Spot No.</b> | <b>Accession no.</b> | <b>Protein Identity</b>                                      | <b>Mr</b> | <b>SCORE</b> | <b># PEPT.</b> | <b>Sequence (*)</b>                                                         | <b>Additional gene copies (#)</b>   |
|------------------------|----------------------|--------------------------------------------------------------|-----------|--------------|----------------|-----------------------------------------------------------------------------|-------------------------------------|
| Band 7                 | EAN83261.1           | hypothetical protein, conserved                              | 30260     | 524          | 16             | <b>K.SYSDAQKWK.L</b><br><b>R.YAHAGYALAVR.T</b>                              | Localized by us to the Mitochondria |
|                        | EAN81197.1           | hypothetical protein, conserved                              | 30269     | 497          | 15             | <b>K.SYSDAHKWK.L</b>                                                        |                                     |
|                        | EAN95832.1           | hypothetical protein, conserved                              | 30333     | 496          | 14             | <b>R.YAYAGYALAVR.T</b>                                                      | EAN99221.1                          |
| Band 7                 | EAN97607.1           | ADP,ATP carrier protein 1, mitochondrial precursor, putative | 35287     | 294          | 8              | <b>R.GIAGAGVLSGVDALKPIYVR.W</b>                                             |                                     |
|                        | EAN90413.1           | ADP,ATP carrier protein 1, mitochondrial precursor, putative | 35303     | 271          | 7              | <b>R.GIAGAGVLSGVDALKPMYVR.W</b><br>R.GIAGAGVLSGVDALKPMYVR.W + Oxidation (M) |                                     |
| Band 7                 | EAN86006.1           | glucosamine-6-phosphate isomerase, putative                  | 31635     | 278          | 8              | <b>K.SLNDETIASNAR.F</b>                                                     |                                     |
|                        | EAN90437.1           | glucosamine-6-phosphate isomerase, putative                  | 31635     | 228          | 7              | <b>K.SLNDETVASNAR.F</b>                                                     |                                     |
| Band 8-9               | EAN91944.1           | glyceraldehyde 3-phosphate dehydrogenase, putative           | 39277     | 779          | 22             | <b>K.FKYNVTTK.S</b>                                                         | EAN91945.1                          |
|                        | EAN90286.1           | glyceraldehyde 3-phosphate dehydrogenase, putative           | 39292     | 740          | 21             | <b>K.FKYTVTTK.S</b>                                                         | EAN90287.1                          |
| Band 8                 | EAN82497.1           | casein kinase, putative                                      | 38355     | 328          | 11             | <b>K.TRHPQLAFEAR.F</b>                                                      | EAN83293.1                          |
|                        | EAN82496.1           | casein kinase, putative                                      | 38351     | 273          | 9              | <b>K.TRHPQLAFEV.R</b>                                                       |                                     |
| Band 8                 | EAN89795.1           | pyruvate dehydrogenase E1 beta subunit, putative             | 38411     | 320          | 8              | <b>K.DLEVASQPQVSDVLAVAR.R</b>                                               |                                     |
|                        | EAN97324.1           | pyruvate dehydrogenase E1 beta subunit, putative             | 38393     | 266          | 8              | <b>K.DLELASQPQVSDVLAVAH.R</b>                                               |                                     |
| Band 8                 | EAN87428.1           | hypothetical protein, conserved                              | 37186     | 134          | 5              | <b>R.VSFPATEEK.A</b>                                                        |                                     |
|                        | EAN87575.1           | hypothetical protein, conserved                              | 37110     | 100          | 4              | <b>R.VSFPATEK.A</b>                                                         |                                     |
| Band 9                 | EAN92220.1           | pyruvate dehydrogenase E1 component alpha subunit, putative  | 43381     | 222          | 7              | <b>K.EVDQQLQPAEK.Q</b>                                                      |                                     |
|                        | EAN93231.1           | pyruvate dehydrogenase E1 component alpha subunit, putative  | 22293     | 183          | 6              | <b>K.EVDQQLLPAEK.Q</b>                                                      |                                     |
| Band 10                | EAN85190.1           | hypothetical protein, conserved                              | 43072     | 572          | 18             | <b>R.VSAYAPTR.K</b><br><b>K.AYISSLVESNK.E</b>                               |                                     |
|                        | EAN88063.1           | hypothetical protein, conserved                              | 43064     | 562          | 18             | <b>R.VSAYAPTRR.E</b><br><b>K.AYVSSLVESNK.E</b><br>K.AYVSSLVESNKEQAR.K       |                                     |
| Band 10                | EAN88162.1           | hypothetical protein, conserved                              | 39057     | 187          | 6              | <b>R.MEEINTTSTR.D + Oxidation (M)</b>                                       |                                     |
|                        | EAN88387.1           | hypothetical protein, conserved                              | 39017     | 180          | 5              | <b>R.IEEINTTSTR.D</b>                                                       |                                     |

| Band / Spot No.                        | Accession no. | Protein Identity                      | Mr    | SCORE | # PEPT. | Sequence (*)                                                                                                                                                                                                                                                                                                                                                                                                                                                                                                                                                                                       | Additional gene copies (#) |
|----------------------------------------|---------------|---------------------------------------|-------|-------|---------|----------------------------------------------------------------------------------------------------------------------------------------------------------------------------------------------------------------------------------------------------------------------------------------------------------------------------------------------------------------------------------------------------------------------------------------------------------------------------------------------------------------------------------------------------------------------------------------------------|----------------------------|
| Band 10                                | EAN97592.1    | chaperone DnaJ protein, putative      | 47563 | 102   | 4       | <i>K.ILEVHIEK.G</i><br><i>K.ALGVTESFPR.V</i><br><i>R.VSLEDMYNGK.T + Oxidation (M)</i><br><i>R.GEGMPLPNTGGLDR.G + Oxidation (M)</i>                                                                                                                                                                                                                                                                                                                                                                                                                                                                 |                            |
|                                        | EAN88684.1    | heat shock protein DnaJ, putative     | 45029 | 99    | 4       | <i>R.YDQFGEK.G</i><br><i>K.IFEIFVEK.G</i><br><i>R.GEGDQIPGVR.L</i><br><i>R.EGMPIPNTGGVER.G + Oxidation</i>                                                                                                                                                                                                                                                                                                                                                                                                                                                                                         |                            |
|                                        | EAN88664.1    | chaperone DnaJ protein, putative      | 51044 | 20    | 1       | <i>K.VPVGTTQQGDK.L</i>                                                                                                                                                                                                                                                                                                                                                                                                                                                                                                                                                                             | EAN93511.1                 |
| Band 10                                | EAN82723.1    | glutamate dehydrogenase, putative     | 43888 | 27    | 1       | <i>R.GYTDDGTTTSVYAK.W</i>                                                                                                                                                                                                                                                                                                                                                                                                                                                                                                                                                                          |                            |
|                                        | EAN84271.1    | glutamate dehydrogenase, putative     | 24319 | 26    | 1       | <i>R.ANILASDVFK.N</i>                                                                                                                                                                                                                                                                                                                                                                                                                                                                                                                                                                              |                            |
| Band 10-11<br>Spot 11-12<br>Spot 30-31 | EAN85498.1    | glutamamyl carboxypeptidase, putative | 44258 | 635   | 19      | <i>R.EIAEEYR.R</i><br><i>K.GGSHFWVR.V</i><br><i>R.ALPNETVSK.M</i><br><i>K.DYLEGLGVK.C</i><br><i>K.LVAFDITSR.N</i><br><i>R.EIAEEYRR.N</i><br><i>K.CTLHNAER.N</i><br><i>K.LREIAEEYR.R</i><br><i>R.SMDHTQWLAK.L</i><br><i>R.SMDHTQWLAK.L + Oxidation (M)</i><br><i>K.WSDPFTLTER.D</i><br><i>R.SYVETQLLPAMK.A</i><br><i>R.SYVETQLLPAMK.A + Oxidation (M)</i><br><i>K.AEFEDAEIVITPR.N</i><br><i>K.ANLWATLPGDGGVTK.G</i><br><b><i>R.NE'PSFEGSEEAPFTK.L</i></b><br><i>K.GGIILSGHTDVVPVDGQK.W</i><br><i>R.AEGCIIGEPTGMTVVIHK.G + Oxidation (M)</i><br><i>R.SYVETQLLPAMKAEFEDAEIVITPR.N + Oxidation (M)</i> |                            |
|                                        | EAN82710.1    | glutamamyl carboxypeptidase, putative | 44359 | 625   | 18      | <b><i>R.DETPSFEGSEEAPITK.L</i></b>                                                                                                                                                                                                                                                                                                                                                                                                                                                                                                                                                                 |                            |
|                                        | EAN82317.1    | glutamamyl carboxypeptidase, putative | 44248 | 567   | 16      | <i>R.EIAEEYR.R</i><br><i>K.DYLEGLGVK.C</i><br><i>K.LVAFDITSR.N</i><br><i>R.EIAEEYRR.N</i><br><i>K.CTLIHNNAER.N</i><br><i>K.LREIAEEYR.R</i>                                                                                                                                                                                                                                                                                                                                                                                                                                                         | EAN82318.1                 |

| Band / Spot No. | Accession no.                            | Protein Identity                        | Mr    | SCORE | # PEPT.                                                                                                             | Sequence (*)                                                                                                                                                                                                                                                                                                                     | Additional gene copies (#) |
|-----------------|------------------------------------------|-----------------------------------------|-------|-------|---------------------------------------------------------------------------------------------------------------------|----------------------------------------------------------------------------------------------------------------------------------------------------------------------------------------------------------------------------------------------------------------------------------------------------------------------------------|----------------------------|
| cont.           | EAN82317.1                               | cont.                                   |       |       |                                                                                                                     | <i>R.SMDHTQWLAK.L</i>                                                                                                                                                                                                                                                                                                            |                            |
| Band 10-11      |                                          |                                         |       |       |                                                                                                                     | <i>R.SMDHTQWLAK.L + Oxidation (M)</i>                                                                                                                                                                                                                                                                                            |                            |
| Spot 11-12      |                                          |                                         |       |       |                                                                                                                     | <i>K.WSDPFLLTER.D</i>                                                                                                                                                                                                                                                                                                            |                            |
| Spot 30-31      |                                          |                                         |       |       |                                                                                                                     | <i>R.SYVETQLLPAMK.A</i>                                                                                                                                                                                                                                                                                                          |                            |
|                 |                                          |                                         |       |       |                                                                                                                     | <i>R.SYVETQLLPAMK.A + Oxidation (M)</i>                                                                                                                                                                                                                                                                                          |                            |
|                 |                                          |                                         |       |       |                                                                                                                     | <i>K.AEFEDAEIVITPR.N</i>                                                                                                                                                                                                                                                                                                         |                            |
|                 |                                          |                                         |       |       |                                                                                                                     | <i>K.ANLWATLPGDGGVTK.G</i>                                                                                                                                                                                                                                                                                                       |                            |
|                 |                                          |                                         |       |       |                                                                                                                     | <i>K.GGILSGHTDVVPVDGQK.W</i>                                                                                                                                                                                                                                                                                                     |                            |
|                 |                                          |                                         |       |       |                                                                                                                     | <i>R.AEGCIIGPTGMTVIVIAHK.G + Oxidation (M)</i>                                                                                                                                                                                                                                                                                   |                            |
|                 |                                          |                                         |       |       |                                                                                                                     | <i>R.SYVETQLLPAMKAEFEDAEIVITPR.N + Oxidation (M)</i>                                                                                                                                                                                                                                                                             |                            |
| EAN88605.1      | acetylmithine deacetylase-like, putative | 44189                                   | 187   | 4     | <b>R.LIAFDTTSR.N</b><br><b>M.PLDSVEWLR.R</b><br><b>R.IDDFVAATAQK.M</b><br><i>K.WSDPFLLTER.D</i>                     | Shares 1 peptide with glutamamyl carboxypeptidases                                                                                                                                                                                                                                                                               |                            |
| EAN96060.1      | glutamamyl carboxypeptidase, putative    | 44531                                   | 157   | 4     | <b>K.LVSFDTTSR.N</b><br><b>K.AYVNDTLLPSMK.K + Oxidation (M)</b><br><b>R.YLPEAEAEKFEER.I</b><br><i>K.DYLEGLGVK.C</i> | Shares this peptide with EAN82317.1                                                                                                                                                                                                                                                                                              |                            |
| Band 11-12      | EAN94612.1                               | hexokinase, putative                    | 52802 | 448   | 15                                                                                                                  | <b>K.DVVELLQK.A</b><br><b>K.GVDHGFLIK.W</b>                                                                                                                                                                                                                                                                                      |                            |
|                 | EAN87141.1                               | hexokinase, putative                    | 52750 | 425   | 15                                                                                                                  | <b>K.GVDNGFLIK.W</b><br><i>R.MIAHLAELR.C + Oxidation</i><br><b>K.DVVELLQNALKR.M</b>                                                                                                                                                                                                                                              |                            |
| Band 11         | EAN95886.1                               | heat shock protein 70 (HSP70), putative | 71171 | 330   | 10                                                                                                                  | <i>R.NQIVITNDK.G</i><br><i>K.NTVNEPNVAGK.I</i><br><i>R.VEIIANDQGNR.T</i><br><i>K.DAGTIAGMEVLR.I</i><br><i>R.AVHDVVLVGGSTR.I</i><br><i>K.VMQLVSDFFGGK.E + Oxidation (M)</i><br><i>R.TTPSYVAFTDTER.L</i><br><i>K.TFNPEEVSSMVLK.M + Oxidation (M)</i><br><i>R.IINEPTAAAIA YGLDK.V</i><br><i>K.NQVAMNPTNTVFDAK.R + Oxidation (M)</i> |                            |

| Band / Spot No.  | Accession no. | Protein Identity                                           | Mr    | SCORE | # PEPT. | Sequence (*)                                                                                                                                                                                                                                                                                                                                          | Additional gene copies (#)                                            |
|------------------|---------------|------------------------------------------------------------|-------|-------|---------|-------------------------------------------------------------------------------------------------------------------------------------------------------------------------------------------------------------------------------------------------------------------------------------------------------------------------------------------------------|-----------------------------------------------------------------------|
| cont.<br>Band 11 | EAN83852.1    | heat shock 70 kDa protein, putative                        | 41044 | 324   | 10      | <b>R.GTLQPVER.V</b><br><b>R.LVSHFTDEFK.R</b>                                                                                                                                                                                                                                                                                                          |                                                                       |
|                  | EAN95887.1    | heat shock protein 70 (HSP70), putative                    | 73607 | 319   | 11      | <b>R.GTLQPVER.V</b><br><b>R.NQIVITNDK.G</b><br><b>K.NTVNEPNVAGK.I</b><br><b>R.LVSHFTDEFK.R</b><br><b>K.DAGTIAGMEVLR.I</b><br><b>R.AVHDVVLVGGSTR.I</b><br><b>K.VMQLVSDFFGGK.E + Oxidation (M)</b><br><b>R.TTPSYVAFTDTER.L</b><br><b>K.TFNPEEVSSMVLK.M + Oxidation (M)</b><br><b>R.IINEPTAAAIAYGLDK.V</b><br><b>K.NQVAMNPTNTVFDAK.R + Oxidation (M)</b> | No unique peptides in sequences, shares different with previous both. |
| Band 11          | EAN90055.1    | galactokinase, putative                                    | 52393 | 246   | 5       | <b>R.SDAEGAQAVVR.K</b>                                                                                                                                                                                                                                                                                                                                |                                                                       |
|                  | EAN91288.1    | galactokinase, putative                                    | 52368 | 235   | 5       | <b>R.SDAEGAQAVVK.K</b>                                                                                                                                                                                                                                                                                                                                |                                                                       |
| Band 12          | EAN84978.1    | elongation factor 1-alpha (EF-1-alpha), putative           | 49652 | 862   | 24      | <b>K.SIEMHHEQLAEATPGDNVGFNVK.N + Oxidation (M)</b>                                                                                                                                                                                                                                                                                                    | EAN97588.1                                                            |
|                  | EAN82858.1    | elongation factor 1-alpha (EF-1-alpha), putative           | 49694 | 843   | 25      | <b>K.SIEMHHEQLVEATPGDNVGFNVK.N</b><br><b>K.SIEMHHEQLVEATPGDNVGFNVK.N + Oxidation (M)</b>                                                                                                                                                                                                                                                              | EAN97589.1                                                            |
| Band 12          | EAN89593.1    | hypothetical protein                                       | 52619 | 377   | 10      | <b>R.IIAKPSVVDIDYK.A</b>                                                                                                                                                                                                                                                                                                                              |                                                                       |
|                  | EAN85276.1    | hypothetical protein                                       | 52756 | 332   | 10      | <b>R.TDNETDFMK.I + Oxidation (M)</b><br><b>R.LSVLASQLGIK.L</b><br><b>R.IIARPSVVDIDYK.A</b>                                                                                                                                                                                                                                                            |                                                                       |
| Band 12          | EAN94510.1    | mitochondrial processing peptidase, beta subunit, putative | 55057 | 169   | 5       | <b>R.ARPASNHATTQALR.S</b>                                                                                                                                                                                                                                                                                                                             |                                                                       |
| Spot 31          | EAN81757.1    | mitochondrial processing peptidase, beta subunit, putative | 31341 | 141   | 3       | <b>R.AAASNFGDLVAASTK.S</b>                                                                                                                                                                                                                                                                                                                            | Shares 2 peptides to EAN94510.1                                       |
|                  | EAN84761.1    | mitochondrial processing peptidase, beta subunit, putative | 15529 | 84    | 3       | <b>K.IPPTNISTVGK.G</b>                                                                                                                                                                                                                                                                                                                                | Shares 1 peptide to EAN94510.1                                        |
| Band 12          | EAN94594.1    | hypothetical protein, conserved                            | 57998 | 193   | 4       | <b>R.SSPVPLLK.L</b><br><b>K.AIEAFALLR.E</b><br><b>K.LIEGDILER.R</b><br><b>K.SLDGQGPLLNSTNSHL.-</b>                                                                                                                                                                                                                                                    |                                                                       |
|                  | EAN94531.1    | hypothetical protein, conserved                            | 57858 | 140   | 4       | <b>R.RVSDSAFYR.F</b>                                                                                                                                                                                                                                                                                                                                  |                                                                       |

| <b>Band / Spot No.</b> | <b>Accession no.</b> | <b>Protein Identity</b>                             | <b>Mr</b> | <b>SCORE</b> | <b># PEPT.</b> | <b>Sequence (*)</b>                                                                                                                                                                                                                                                                           | <b>Additional gene copies (#)</b> |
|------------------------|----------------------|-----------------------------------------------------|-----------|--------------|----------------|-----------------------------------------------------------------------------------------------------------------------------------------------------------------------------------------------------------------------------------------------------------------------------------------------|-----------------------------------|
| Band 13                | EAN99374.1           | pyruvate phosphate dikinase, putative               | 101851    | 2013         | 64             | <b>K.VIPEIMIPLVGK.K</b><br><b>K.VIPEIMIPLVGK.K + Oxidation (M)</b><br><b>K.DPFESIDQEGVGELMR.I</b>                                                                                                                                                                                             |                                   |
|                        | EAN98352.1           | pyruvate phosphate dikinase, putative               | 101833    | 2011         | 59             | <b>K.VVPEIMIPLVGK.K</b><br><b>K.VVPEIMIPLVGK.K + Oxidation</b><br><b>K.DPFESIDQEGVGELVR.I</b>                                                                                                                                                                                                 |                                   |
| Band 13                | EAN82002.1           | cytoskeleton-associated protein<br>CAP5.5, putative | 82008     | 506          | 13             | K.LDIQFTK.L<br>R.DFTGAPSYR.F<br>K.GYGGVNELLGK.L<br>R.HSPLMISVSR.A<br>R.ATVPEEVLER.L<br>R.FDEAWVNATK.G<br>K.LSATNPALHNR.V<br>K.MPGEAAVTSAGSK.L + Oxidation (M)<br>R.QFQNFGITMLK.I + Oxidation (M)<br>R.SDVFAQALSEEYR.Q<br>K.FSPDSSVIPLGSSIK.K<br>R.YLEAGNIVLLNTPAGK.S<br>R.VIELADGSVDEEGILSK.C |                                   |
|                        | EAN92788.1           | cytoskeleton-associated protein<br>CAP5.5, putative | 89960     | 436          | 11             | <b>K.NSSGDPEPSDAFTFVVAR.E</b>                                                                                                                                                                                                                                                                 |                                   |
| Band 13                | EAN95481.1           | retrotransposon hot spot (RHS)<br>protein, putative | 108368    | 398          | 11             | <b>R.VLIGTPGIGK.S</b><br><b>K.GYIHYDVAK.K</b><br><b>R.VWQIVLDDLTK.W</b>                                                                                                                                                                                                                       |                                   |
|                        | EAN84826.1           | retrotransposon hot spot (RHS)<br>protein, putative | 104023    | 342          | 13             | <b>K.GYIHYDVAK.K</b><br><b>K.NSLDTAFEVAR.I</b>                                                                                                                                                                                                                                                |                                   |
|                        | EAN81408.1           | retrotransposon hot spot (RHS)<br>protein, putative | 103887    | 340          | 14             | <b>R.ALEQLGLR.A</b><br><b>R.STVEDILLK.G</b><br><b>R.LGAVNAALVAIK.D</b><br><b>K.NSLDAAFEVAR.I</b><br><b>R.SEFEGDTDQPAATHIR.V</b>                                                                                                                                                               |                                   |
|                        | EAN82412.1           | retrotransposon hot spot (RHS)<br>protein, putative | 109652    | 311          | 10             | <b>R.VLIGTPGIGK.S</b><br><b>R.MEDLGPLL.R.Y + Oxidation (M)</b><br><b>K.QLDAALEEV.R.N</b>                                                                                                                                                                                                      |                                   |

| Band / Spot No. | Accession no. | Protein Identity                                    | Mr     | SCORE | # PEPT. | Sequence (*)                                                                                                                                                       | Additional gene copies (#) |
|-----------------|---------------|-----------------------------------------------------|--------|-------|---------|--------------------------------------------------------------------------------------------------------------------------------------------------------------------|----------------------------|
| cont.           | EAN94997.1    | retrotransposon hot spot (RHS)<br>protein, putative | 126164 | 288   | 8       | <b>R.LLIGTPGIGK.S</b><br><b>K.QLDAALEEVN.N not unique</b><br><b>R.VWQIVLDDLTW.W not unique</b>                                                                     |                            |
|                 | EAN83522.1    | retrotransposon hot spot (RHS)<br>protein, putative | 76947  | 252   | 8       | <b>R.LGAVDVALLAIK.D</b>                                                                                                                                            |                            |
|                 | EAN84956.1    | retrotransposon hot spot (RHS)<br>protein, putative | 115032 | 197   | 8       | <b>K.ILLEAITK.L</b><br><b>K.EFFKDPTK.Y</b><br><b>K.GYHYDVAR.K</b>                                                                                                  |                            |
|                 | EAN97710.1    | retrotransposon hot spot (RHS)<br>protein, putative | 108700 | 192   | 6       | <b>R.VQTSTSVVK.S</b><br><b>R.MEEVGPILR.Y + Oxidation (M)</b><br><b>K.GVVSLEQWR.N</b><br><b>R.LLLIGTPGIGK.S</b><br><b>R.NYEGKDTVSPK.G</b><br><b>K.LNDFLLEMEGK.G</b> |                            |
|                 | EAN85054.1    | retrotransposon hot spot (RHS)<br>protein, putative | 139992 | 168   | 5       | <b>R.VLTQLLR.E</b>                                                                                                                                                 |                            |
|                 | EAN81660.1    | retrotransposon hot spot (RHS)<br>protein, putative | 62254  | 149   | 5       | <b>R.VLTQVLR.E</b><br><b>R.VLTQVLRER.R</b>                                                                                                                         |                            |
|                 | EAN82470.1    | retrotransposon hot spot (RHS)<br>protein, putative | 114542 | 142   | 6       | <b>K.WSEAAAEVKA</b><br><b>K.LNAVLTQVLTEEK.R</b>                                                                                                                    | EAN98283.1                 |
|                 | EAN99306.1    | retrotransposon hot spot (RHS)<br>protein, putative | 109235 | 127   | 5       | <b>R.AQISTSVVK.S</b><br><b>R.GVLSLEQWR.D</b><br><b>R.NDSVQSGEAR.L</b>                                                                                              |                            |

The following appear on the list but no unique peptides to them; all shared to previous reported above:

EAN84856.1;EAN87824.1;EAN86507.1;EAN90067.1;EAN90465.1;EAN88911.1;EAN94539.1;EAN98325.1;EAN86737.1;EAN83818.1;EAN93613.1;EAN91620.1;EAN94122.1;EAN97715.1;EAN86249.1;EAN99309.1;EAN86534.1;EAN83062.1;EAN96809.1;EAN85806.1;EAN94683.1;EAN93071.1;EAN91733.1;EAN96808.1;EAN84415.1;EAN88539.1;EAN81681.1;EAN82927.1;EAN94606.1;EAN85486.1;EAN93121.1

| Band / Spot No. | Accession no. | Protein Identity                              | Mr     | SCORE | # PEPT. | Sequence (*)                                                                                                                                                                                                                                                                                                                                                                                                                                                                                                           | Additional gene copies (#)             |
|-----------------|---------------|-----------------------------------------------|--------|-------|---------|------------------------------------------------------------------------------------------------------------------------------------------------------------------------------------------------------------------------------------------------------------------------------------------------------------------------------------------------------------------------------------------------------------------------------------------------------------------------------------------------------------------------|----------------------------------------|
| Band 13         | EAN92377.1    | calcium-translocating P-type ATPase, putative | 110858 | 611   | 21      | R.AIFNNTK.Q<br>K.LNSLFVK.G<br>R.AESAIEALK.S<br>K.NTTLEFTR.Q<br>K.GAPEEVLRR.S<br>R.DLPSVETLGR.C<br>K.AVMSAVLFSR.T + Oxidation (M)<br>R.GLSADEVVEER.R<br>K.LDEFGMLLSK.V<br>K.LDEFGMLLSK.V + Oxidation (M)<br>R.TGAFTEIGSIER.D<br>K.IDAMSGSEHALR.C + Oxidation (M)<br>K.MVLADDNFATVVK.A<br><br>K.ADIGIAMGSGTQVAK.A + Oxidation (M)<br>K.MVLADDNFATVVK.A + Oxidation (M)<br>R.EQEEVKTPLQIK.L<br>K.KADIGIAMGSGTQVAK.A<br>K.IGEATEAALLVMSEK.L<br><br>K.KADIGIAMGSGTQVAK.A + Oxidation (M)<br>K.IGEATEAALLVMSEK.L + Oxidation |                                        |
|                 | EAN81423.1    | calcium-translocating P-type ATPase, putative | 19723  | 132   | 3       | <b>K.LVLAQFEDTLVR.I</b>                                                                                                                                                                                                                                                                                                                                                                                                                                                                                                |                                        |
| Spot 1          | EAN83392.1    | calmodulin, putative                          | 16814  | 261   | 6       | K.ELGTVMR.S + Oxidation (M)<br>R.HVMTNLGEK.L + Oxidation (M)<br>K.LTDEEVDEMIR.E + Oxidation (M)<br>R.VFDKDGNGFISAAELR.H<br>K.MQSDSEEEIKEAFR.V + Oxidation (M)<br>K.EAFSLFDKGDGTITTK.E                                                                                                                                                                                                                                                                                                                                  | EAN83393.1<br>EAN86238.1<br>EAN86242.1 |
|                 | EAN89727.1    | calmodulin, putative                          | 17154  | 58    | 1       | <b>K.TGFINVTDLK.F</b>                                                                                                                                                                                                                                                                                                                                                                                                                                                                                                  | EAN93967.1                             |
| Spot 2          | EAN98394.1    | p22 protein precursor, putative               | 26158  | 363   | 9       | <b>K.HEDEEIVIR.C</b><br><b>K.LALDDSVEGNQK.R</b>                                                                                                                                                                                                                                                                                                                                                                                                                                                                        |                                        |
|                 | EAN91460.1    | p22 protein precursor, putative               | 26184  | 323   | 8       | <b>K.HEDEEIIIR.C</b><br><b>K.LALDDSVEGNR.K</b>                                                                                                                                                                                                                                                                                                                                                                                                                                                                         |                                        |
| Spot 8-9        | EAN99021.1    | cytochrome C oxidase subunit IV, putative     | 39097  | 1038  | 30      | <b>R.HITSEAIK.A</b>                                                                                                                                                                                                                                                                                                                                                                                                                                                                                                    |                                        |
|                 | EAO00075.1    | cytochrome C oxidase subunit IV, putative     | 39137  | 1032  | 29      | <b>R.HITPEAIK.A</b>                                                                                                                                                                                                                                                                                                                                                                                                                                                                                                    |                                        |



| Band / Spot No. | Accession no. | Protein Identity                                                 | Mr    | SCORE | # PEPT. | Sequence (*)                                                                                   | Additional gene copies (#)                     |
|-----------------|---------------|------------------------------------------------------------------|-------|-------|---------|------------------------------------------------------------------------------------------------|------------------------------------------------|
| Spot 10         | EAN82883.1    | 3,2-trans-enoyl-CoA isomerase, mitochondrial precursor, putative | 39837 | 311   | 7       | <b>R.QGVPSGVPPEL.R.A</b>                                                                       |                                                |
|                 | EAN83656.1    | 3,2-trans-enoyl-CoA isomerase, mitochondrial precursor, putative | 45479 | 298   | 7       | <b>R.QGAPTGVPPPEL.R.A</b>                                                                      |                                                |
| Spot 11-12      | EAO00025.1    | alcohol dehydrogenase, putative                                  | 42442 | 596   | 14      | <b>K.EVQIPSGFEQLGMK.E + Oxidation (M)</b><br><b>K.EVQIPSGFEQLGMKEK.D + Oxidation (M)</b>       |                                                |
|                 | EAN97413.1    | alcohol dehydrogenase, putative                                  | 42479 | 581   | 14      | <b>K.EVQIPPGFEQLGMK.E + Oxidation (M)</b><br><b>K.EVQIPPGFEQLGMKEK.D + Oxidation (M)</b>       |                                                |
| Spot 16-17      | EAN82242.1    | co-chaperone GrpE, putative                                      | 24363 | 650   | 16      | <b>K.VSAEEIESNK.N</b><br><b>K.VSAEEIESNKNLSSIHTGVK.L</b>                                       | In spot 17 first is EAN81815.1 then EAN82242.1 |
|                 | EAN81815.1    | co-chaperone GrpE, putative                                      | 24421 | 624   | 16      | <b>K.VSTEEIESNK.N</b><br><b>K.VSTEEIESNKNLSSIHTGVK.L</b>                                       |                                                |
| Spot 18         | EAN87362.1    | mucin-associated surface protein (MASP), putative                | 43226 | 22    | 1       | <b>R.VTTVGEEAK.T</b>                                                                           |                                                |
|                 | EAN84330.1    | mucin-associated surface protein (MASP), putative                | 44673 | 18    | 1       | <b>K.VAISLPSR.M</b>                                                                            | EAN86283.1                                     |
| Spot 22         | EAN82097.1    | hypothetical protein, conserved                                  | 14352 | 247   | 6       | <b>R.TPVGQSSKDYTETHVLFMNK.L + Oxidation (M)</b><br><b>R.TPAGQSSKDYTETHVLFMNK.L + Oxidation</b> |                                                |
|                 | EAN97997.1    | hypothetical protein, conserved                                  | 14334 | 242   | 6       | <b>R.TPAGQSSKDYTETHVLFMNK.L + Oxidation</b>                                                    |                                                |
| Spot 28         | EAN89116.1    | heat shock protein 20, putative                                  | 16000 | 269   | 7       | <b>K.ILADLPGMNR.N + Oxidation (M)</b>                                                          |                                                |
|                 | EAO00223.1    | heat shock protein 20, putative                                  | 15973 | 266   | 7       | <b>K.ILADLPGMSR.N + Oxidation</b>                                                              |                                                |
| Spot 30         | EAN83160.1    | phosphomannose isomerase, putative                               | 46214 | 141   | 4       | <b>K.VAAESFVAK.M</b><br><b>R.FTEFSLYR.M</b><br><b>K.TLLGNVAVVSAK.E</b>                         |                                                |
|                 | EAN92798.1    | phosphomannose isomerase, putative                               | 46092 | 87    | 3       | <b>K.VAAESFVAK.M not unique</b><br><b>R.FTEFSLYR.L not unique</b><br><b>K.TLLGNTAVVSAK.E</b>   |                                                |

| Band / Spot No.          | Accession no. | Protein Identity                              | Mr    | SCORE | # PEPT. | Sequence (*)                                                                                                                                                                                                                                                                                                                                                                                                                                                                                                                                                                                                                                                                                                              | Additional gene copies (#) |
|--------------------------|---------------|-----------------------------------------------|-------|-------|---------|---------------------------------------------------------------------------------------------------------------------------------------------------------------------------------------------------------------------------------------------------------------------------------------------------------------------------------------------------------------------------------------------------------------------------------------------------------------------------------------------------------------------------------------------------------------------------------------------------------------------------------------------------------------------------------------------------------------------------|----------------------------|
| Spot 32-33<br>Spot 34-35 | EAN92318.1    | 69 kDa paraflagellar rod protein,<br>putative | 70087 | 1273  | 31      | K.TVQQITQ.-<br>K.AQLAAIEK.A<br>K.TLGQLVYK.K<br>K.RLEEIDR.N<br>R.RIQELER.V<br>R.GKTVQQITQ.-<br>K.SFQETSAIK.D<br>K.TLQSQQYR.G<br>K.FIQENLDR.Q<br>K.TLGQLVYKK.E<br><b>K.TNEELADLR.L</b><br>K.KSFQETSAIK.D<br>R.LEEIDRNIR.T<br><b>R.LGTERFEEVK.R</b><br>R.SKTLQSQQYR.G<br>K.WNLTEAYDIK.K<br>K.AQELLSSVEGGTK.W<br>K.SFQETSAIKDAK.R<br>R.AQVEEELEMLK.D + Oxidation (M)<br>K.WNLTEAYDIKK.L<br>R.TVSFTGTIDNAIAK.L<br>R.LQVHQEYLEAFR.R<br>R.AQVEEELEMLKDK.M + Oxidation (M)<br>R.IIGQTEDENKPFGR.I<br>R.SQLDASEMAQVPVAVLK.N<br><br>R.SQLDASEMAQVPVAVLK.N + Oxidation (M)<br>R.TVSFTGTIDNAIAKLEK.I<br>K.FIQENLDRQDEAWR.R<br>R.TTHIQLEFAIETFDPNK.K<br>R.NVAIADGEMAI AEEQYYIK.A + Oxidation (M)<br>K.EASGAVGPADQQQPAVPEVTDVTLEAAR<br>K |                            |
|                          | EAN81200.1    | paraxonemal rod protein PAR2,<br>putative     | 31620 | 554   | 15      | <b>K.TNEELGDLR.L</b>                                                                                                                                                                                                                                                                                                                                                                                                                                                                                                                                                                                                                                                                                                      |                            |
|                          | EAN87979.1    | paraflagellar rod protein 3, putative         | 69189 | 493   | 12      | K.VEEELRR.S<br>K.TQLAQLEK.T<br>R.LIDLIQDK.F                                                                                                                                                                                                                                                                                                                                                                                                                                                                                                                                                                                                                                                                               |                            |

| Band / Spot |               |                                            |       |       |         |                                                                                                                                                                                                                                                               |  |                                                          |
|-------------|---------------|--------------------------------------------|-------|-------|---------|---------------------------------------------------------------------------------------------------------------------------------------------------------------------------------------------------------------------------------------------------------------|--|----------------------------------------------------------|
| No.         | Accession no. | Protein Identity                           | Mr    | SCORE | # PEPT. | Sequence (*)                                                                                                                                                                                                                                                  |  | Additional gene copies (#)                               |
| cont.       | EAN87979.1    | cont.                                      |       |       |         | K.TSQDLAALR.L<br>K.AQFMDIIGVK.K + Oxidation (M)<br>R.IEEVDREEK.R<br><b>K.LGTERFEEVK.R not unique</b><br>R.LIDLIDQDKFR.L<br><br>R.QGVVEELAMLK.E + Oxidation (M)<br>K.ADLEDAEAMKR.H + Oxidation (M)<br>R.SQLDATQLAQVPTR.T<br>R.VVSFTQMIDNAIAK.M + Oxidation (M) |  |                                                          |
| Spot 33     | EAN95887.1    | heat shock protein 70 (HSP70),<br>putative | 73607 | 204   | 5       | R.GTLQPVER.V<br>K.NTVNEPNVAGK.I<br>K.VMQLVSDFFGGK.E + Oxidation (M)<br>R.TTPSYVAFTDTER.L<br><br>K.NQVAMNPTNTVFDAK.R + Oxidation (M)                                                                                                                           |  | EAN83852.1 no unique peptides<br>but shares with both... |
|             | EAN95886.1    | heat shock protein 70 (HSP70),<br>putative | 71171 | 202   | 5       | <b>R.VEIIANDQGNR.T</b>                                                                                                                                                                                                                                        |  |                                                          |
| Spot 38     | EAN95887.1    | heat shock protein 70 (HSP70),<br>putative | 73607 | 1070  | 31      | <b>R.TTPSYVAFTDTER.L</b>                                                                                                                                                                                                                                      |  | EAN83852.1                                               |
|             | EAN95886.1    | heat shock protein 70 (HSP70),<br>putative | 71171 | 1053  | 30      | <b>R.VEIIANDQGNR.T</b>                                                                                                                                                                                                                                        |  |                                                          |
|             | EAN84609.1    | heat shock 70 kDa protein, putative        | 24348 | 205   | 5       | <b>R.TTPSYVAFTETER.L</b>                                                                                                                                                                                                                                      |  | EAN89698.1                                               |
| Spot 36-39  | EAN90720.1    | calreticulin, putative                     | 46396 | 906   | 27      | <b>K.EVLELVEK.T</b><br><b>K.DIMIGDDLK.E + Oxidation (M)</b><br><b>K.GQLDGDWTLLPPR.E</b><br><b>R.FYALSTAFPTPITNEK.K</b><br><b>R.FYALSTAFPTPITNEKK.S</b>                                                                                                        |  |                                                          |
|             | EAN82340.1    | calreticulin, putative                     | 46419 | 894   | 27      | <b>K.EVLDLVEK.T</b><br><b>K.DIVIGDDLK.E</b><br><b>K.GQLEEDWSLLLPR.E</b><br><b>R.FYALSTAFPTPINNEK.K</b><br><b>R.FYALSTAFPTPINNEKK.S</b>                                                                                                                        |  |                                                          |

**TABLE S7- PROTEINS FUNCTIONAL GROUPS - CELLULAR LOCATION - COMPARATIVE EXPRESSION DATA**

**Notes:** (\*) The assignment of the protein cellular location is based on: a. publications describing the location of the protein in *T. cruzi*; b. publications describing the location of conserved pathways in trypanosomatids or in other eukaryotes; c. gene ontology annotation found in GeneBank. d. in silico prediction based in targeting signals. When the location is unknown or uncertain, an X is displayed in the table. An asterisk indicates when the location of the protein in *T. cruzi* has been experimentally demonstrated.

**Numbers in brackets denote:** (1) No previous expression data in *T. cruzi* proteome (Atwood et al, 2005), (2) Not previously found in the epimastigote stage whole cell proteomic study but evidence available indicating the expression of the protein in the epimastigote stage.

**PubMed Reference:** The references correspond to work in which the gene, protein, or activity of the protein has been described either in *T. cruzi* or in other trypanosomatids. When no reference in trypanosomatids is available, the reference corresponds to the identification of the gene, protein or activity in other species. N/A : references not available in trypanosomatids

| ACC No.                                               | METABOLISM<br>AMINOACID MET.                                                 | Predicted Location           | PubMed REFERENCE                                                                                                                                                                                                                                                                                                                                                                                                                                                                                                                                                                                                       |
|-------------------------------------------------------|------------------------------------------------------------------------------|------------------------------|------------------------------------------------------------------------------------------------------------------------------------------------------------------------------------------------------------------------------------------------------------------------------------------------------------------------------------------------------------------------------------------------------------------------------------------------------------------------------------------------------------------------------------------------------------------------------------------------------------------------|
| <b>8</b>                                              |                                                                              |                              |                                                                                                                                                                                                                                                                                                                                                                                                                                                                                                                                                                                                                        |
| EAN98485.1                                            | histidine ammonia-lyase, putative                                            | X                            | Important for conversion of histidine to glutamate. The <i>Trypanosoma cruzi</i> proteome. Science. 2005 Jul 15;309(5733):473-6. Atwood JA 3rd, Weatherly DB, Minning TA, Bundy B, Cavola C, Opperdoes FR, Orlando R, Tarleton RL.                                                                                                                                                                                                                                                                                                                                                                                     |
| EAN87724.1                                            | glutamate dehydrogenase, putative                                            | cytoplasm/<br>mitochondrion* | The NADP+-linked glutamate dehydrogenase from <i>Trypanosoma cruzi</i> : sequence, genomic organization and expression. Biochem J. 1998 March 1; 330(Pt 2): 951-958. P Barderi, O Campetella, A C Frasch, J A Santomé, U Hellman, U Pettersson, and J J Cazzulo                                                                                                                                                                                                                                                                                                                                                        |
| EAN86114.1                                            | cysteine desulfurase, putative (1)                                           | mitochondrion                | Important for Fe-S cluster biogenesis (IscS). // Knock-downs of iron-sulfur cluster assembly proteins IscS and IscU down-regulate the active mitochondrion of procyclic <i>Trypanosoma brucei</i> . J Biol Chem. 2006 Sep 29;281(39):28679-86. Smid O, Horáková E, Vilimová V, Hrdy I, Cammack R, Horváth A, Lukes J, Tachezy J.                                                                                                                                                                                                                                                                                       |
| EAN88605.1                                            | acetylornithine deacetylase-like, putative                                   | X                            | N/A. In bacteria is important for synthesis of arginine. The sequence has similarities to those of metalloproteases // Mechanistic analysis of the argE-encoded N-acetylornithine deacetylase. Biochemistry, 39 (6), 1285 -1293, 2000. // Farah Javid-Majd and John S. Blanchard //Sequence analysis of the aminoacylase-1 family. A new proposed signature for metalloproteases. Comp Biochem Physiol B Biochem Mol Biol. 2001 Mar;128(3):469-81. Biagini A, Puigserver A.                                                                                                                                            |
| EAN83019.1                                            | cystathionine beta-synthase                                                  | X                            | Characterization of transsulfuration and cysteine biosynthetic pathways in the protozoan hemoflagellate, <i>Trypanosoma cruzi</i> . Isolation and molecular characterization of cystathionine beta-synthase and serine acetyltransferase from <i>Trypanosoma</i> . J Biol Chem. 2001 Mar 2;276(9):6516-23. Nozaki T, Shigeta Y, Saito-Nakano Y, Imada M, Kruger WD.                                                                                                                                                                                                                                                    |
| EAN91861.1                                            | pyrroline-5-carboxylate reductase, putative (1)                              | X                            | Important for oxidation of proline (proline oxidase) // Differentiation of <i>Trypanosoma brucei</i> bloodstream trypomastigotes from long slender to short stumpy-like forms in axenic culture. Mol Biochem Parasitol. 1990 Apr;40(1):13-22. Hamm B, Schindler A, Mecke D, Duszenko M.                                                                                                                                                                                                                                                                                                                                |
| EAN86462.1                                            | aspartate aminotransferase, mitochondrial, putative                          | mitochondrion/<br>cytoplasm* | Glutamate dehydrogenase and aspartate aminotransferase in <i>Trypanosoma cruzi</i> . Comp Biochem Physiol B. 1977;56(3):301-3. Cazzulo JJ, Juan SM, Segura EL.                                                                                                                                                                                                                                                                                                                                                                                                                                                         |
| EAO00085.1                                            | alanine aminotransferase, putative                                           | mitochondrion/<br>cytoplasm* | Subcellular localization of glutamate dehydrogenases and alanine aminotransferase in epimastigotes of <i>Trypanosoma cruzi</i> . FEMS Microbiol Lett. 1991 Oct 1;67(2):131-5. Duschak VG.                                                                                                                                                                                                                                                                                                                                                                                                                              |
| <b>NUCLEOSIDE, NUCLEOTIDE &amp; NUCLEIC ACID MET.</b> |                                                                              |                              |                                                                                                                                                                                                                                                                                                                                                                                                                                                                                                                                                                                                                        |
| <b>3</b>                                              |                                                                              |                              |                                                                                                                                                                                                                                                                                                                                                                                                                                                                                                                                                                                                                        |
| EAN88252.1                                            | ribonucleoside-diphosphate reductase small chain, putative                   | X                            | Cloning, sequencing and expression of ribonucleotide reductase R2 from <i>Trypanosoma brucei</i> . FEBS Lett. 1997 Sep 8;414(2):449-53. Dormeyer M, Schöneck R, Dittmar GA, Krauth-Siegel RL.                                                                                                                                                                                                                                                                                                                                                                                                                          |
| EAN92546.1                                            | adenosine 5'-monophosphoramidase, putative                                   | nucleus / cytoplasm          | N/A. Nucleoside monophosphoramidase hydrolase from rat liver: purification and characterization. Int J Biochem. 1994 Feb;26(2):235-45. Kuba M, Okizaki T, Ohmori H, Kumon A.                                                                                                                                                                                                                                                                                                                                                                                                                                           |
| EAN94685.1                                            | methylthioadenosine phosphorylase, putative                                  | X                            | <i>Trypanosoma cruzi</i> adenine nucleoside phosphorylase. Purification and substrate specificity. Biochem Pharmacol. 1987 Feb 15;36(4):553-60. Miller RL, Sabourin CL, Krenitsky TA.                                                                                                                                                                                                                                                                                                                                                                                                                                  |
| <b>CARBOHYDRATE MET.</b>                              |                                                                              |                              |                                                                                                                                                                                                                                                                                                                                                                                                                                                                                                                                                                                                                        |
| <b>9</b>                                              |                                                                              |                              |                                                                                                                                                                                                                                                                                                                                                                                                                                                                                                                                                                                                                        |
| EAN86006.1                                            | glucosamine-6-phosphate isomerase, putative                                  | glycosome                    | N/A. Molecular cloning and analysis of the NAG1 cDNA coding for glucosamine-6-phosphate deaminase from <i>Candida albicans</i> . J Biol Chem. 1993 May 5;268(13):9206-14. Natarajan K, Datta A. // In silico prediction of the glycosomal enzymes of <i>Leishmania major</i> and trypanosomes. Mol Biochem Parasitol. 2006 Jun;147(2):193-206. Opperdoes FR, Szikora JP.                                                                                                                                                                                                                                               |
| EAO00025.1                                            | alcohol dehydrogenase, putative                                              | X                            | Characterization by electrophoretic zymograms of 19 <i>Trypanosoma cruzi</i> clones derived from two chronic chagasic patients. Comp Biochem Physiol B. 1987;87(2):417-22. Montamat EE, Arauzo S, Cazzulo JJ, Subias E.                                                                                                                                                                                                                                                                                                                                                                                                |
| EAN85464.1                                            | N-acetylglucosamine-6-phosphate deacetylase-like protein, putative           | X                            | N/A. Identification and characterization of the genes for N-acetylglucosamine kinase and N-acetylglucosamine-phosphate deacetylase in the pathogenic fungus <i>Candida albicans</i> . Eur J Biochem. 2001 Apr;268(8):2498-505. Yamada-Okabe T, Sakamori Y, Mio T, Yamada-Okabe H.                                                                                                                                                                                                                                                                                                                                      |
| EAN90055.1                                            | galactokinase, putative                                                      | glycosome                    | Putative galactokinase genes exist in <i>T. cruzi</i> , even though this organism cannot take up galactose. It is possible that one or more of these enzymes may be involved in salvage pathways for other sugars in this organism. // Plant-like traits associated with metabolism of <i>Trypanosoma</i> parasites. Proc Natl Acad Sci U S A. 2003 Feb 4;100(3):1067-71. Hannaert V, Saavedra E, Duffieux F, Szikora JP, Rigden DJ, Michels PA, Opperdoes FR. // Sugar nucleotide pools of <i>Trypanosoma brucei</i> , <i>Trypanosoma cruzi</i> , and <i>Leishmania major</i> . Eukaryot Cell. 2007 Aug;6(8):1450-63. |
| EAN83988.1                                            | fructose-1,6-bisphosphatase, cytosolic, putative (2)                         | cytoplasm / glycosome        | Turnock DC, Ferguson MA. // In silico prediction of the glycosomal enzymes of <i>Leishmania major</i> and trypanosomes. Mol Biochem Parasitol. 2006 Jun;147(2):193-206. Opperdoes FR, Szikora JP. Plant-like traits associated with metabolism of <i>Trypanosoma</i> parasites. Proc Natl Acad Sci U S A. 2003 Feb 4;100(3):1067-71.                                                                                                                                                                                                                                                                                   |
| EAN90241.1                                            | 2-oxoisovalerate dehydrogenase beta subunit, mitochondrial precursor (1)     | mitochondrion                | Hannaert V, Saavedra E, Duffieux F, Szikora JP, Rigden DJ, Michels PA, Opperdoes FR. // In silico prediction of the glycosomal enzymes of <i>Leishmania major</i> and trypanosomes. Mol Biochem Parasitol. 2006 Jun;147(2):193-206. Opperdoes FR, Szikora JP.                                                                                                                                                                                                                                                                                                                                                          |
| EAN83800.1                                            | D-isomer specific 2-hydroxyacid dehydrogenase-protein, putative              | X                            | 2-oxoglutarate dehydrogenase complex catalyzes a step within the citric acid cycle, the branched-chain 2-oxo acid dehydrogenase complex is involved in amino acid degradation // A family of highly conserved glycosomal 2-hydroxyacid dehydrogenases from <i>Phytomonas</i> sp. J Biol Chem. 2000 Oct 13;275(41):31833-7. Uttaro AD, Altabe SG, Rider MH, Michels PA, Opperdoes FR. // Crystal structure of 2-oxoisovalerate dehydrogenase and the architecture of 2-oxo acid dehydrogenase multienzyme complexes. Nat Struct Biol. 1999 Aug;6(8):785-92. Aevarsson A, Seger K, Turley S, Sokatch JR, Hol WG.         |
| EAN91548.1                                            | 2- aminoethylphosphonate:pyruvateaminotransferase-like protein, putative (3) | cytoplasmic vesicles*        | The NAD-linked aromatic alpha-hydroxy acid dehydrogenase from <i>Trypanosoma cruzi</i> . A new member of the cytosolic malate dehydrogenases group without malate dehydrogenase activity. Eur J Biochem. 1999 Dec;266(3):903-10. Cazzulo Franke MC, Vernal J, Cazzulo JJ, Nowicki C.                                                                                                                                                                                                                                                                                                                                   |
| EAN83160.1                                            | phosphomannose isomerase, putative (1)                                       | glycosome                    | Properties of phosphoenolpyruvate mutase, the first enzyme in the aminoethylphosphonate biosynthetic pathway in <i>Trypanosoma cruzi</i> . J Biol Chem. 2003 Jun 20;278(25):22703-8. Sarkar M, Hamilton CJ, Fairlamb AH.                                                                                                                                                                                                                                                                                                                                                                                               |
| <b>LIPID, FATTY ACID AND STEROL MET.</b>              |                                                                              |                              |                                                                                                                                                                                                                                                                                                                                                                                                                                                                                                                                                                                                                        |
| <b>17</b>                                             |                                                                              |                              |                                                                                                                                                                                                                                                                                                                                                                                                                                                                                                                                                                                                                        |
| EAN87378.1                                            | 3-hydroxy-3-methylglutaryl-CoA reductase, putative                           | X                            | The role of phosphomannose isomerase in <i>Leishmania mexicana</i> glycoconjugate synthesis and virulence. J Biol Chem. 2001 Mar 2;276(9):6566-75. Garami A, Ilg T. // In silico prediction of the glycosomal enzymes of <i>Leishmania major</i> and trypanosomes. Mol Biochem Parasitol. 2006 Jun;147(2):193-206. Opperdoes FR, Szikora JP.                                                                                                                                                                                                                                                                           |
| EAN97370.1                                            | isopentenyl-diphosphate delta-isomerase, putative (1)                        | glycosome                    | Mitochondrial localization of the mevalonate pathway enzyme 3-Hydroxy-3-methyl-glutaryl-CoA reductase in the Trypanosomatidae. Mol Biol Cell. 2004 Mar;15(3):1356-63. Peña-Díaz J, Montalveti A, Flores CL, Constan A, Hurtado-Guerrero R, De Souza W, Gancedo C, Ruiz-Perez LM, Gonzalez-Pacanowska D.                                                                                                                                                                                                                                                                                                                |
| EAN86492.1                                            | squalene monooxygenase, putative (3)                                         | X                            | N/A although necessary for the next step of isoprenoid synthesis, which has been described in <i>T. cruzi</i> // Bisphosphonates are potent inhibitors of <i>Trypanosoma cruzi</i> farnesyl pyrophosphate synthase. J Biol Chem. 2001 Sep 7;276(36):33930-7. Montalveti A, Bailey BN, Martin MB, Severin GW, Oldfield E, Docampo R. // In silico prediction of the glycosomal enzymes of <i>Leishmania major</i> and trypanosomes. Mol Biochem Parasitol. 2006 Jun;147(2):193-206. Opperdoes FR, Szikora JP.                                                                                                           |
| EAN97907.1                                            | lanosterol synthase, putative (2)                                            | X                            | Squalene epoxidase. Not studied in trypanosomatids although sterol biosynthesis occurs through the mevalonate pathway // Lipid biosynthesis pathways as chemotherapeutic targets in kinetoplastid parasites. Parasitology. 1997;114 Suppl:S91-9. Urbina JA.                                                                                                                                                                                                                                                                                                                                                            |
|                                                       |                                                                              |                              | Cloning and heterologous expression of the <i>Trypanosoma brucei</i> lanosterol synthase gene. Mol Biochem Parasitol. 2000 Oct;110(2):399-403. Buckner FS, Nguyen LN, Joubert BM, Matsuda SP.                                                                                                                                                                                                                                                                                                                                                                                                                          |

|                                          |                                                                      |                             |                                                                                                                                                                                                                                                                                                                                                                                                                                                                                                                                                                                                                       |
|------------------------------------------|----------------------------------------------------------------------|-----------------------------|-----------------------------------------------------------------------------------------------------------------------------------------------------------------------------------------------------------------------------------------------------------------------------------------------------------------------------------------------------------------------------------------------------------------------------------------------------------------------------------------------------------------------------------------------------------------------------------------------------------------------|
| EAN98359.1                               | lanosterol 14-alpha-demethylase, putative (3)                        | X                           | Cloning and analysis of <i>Trypanosoma cruzi</i> lanosterol 14alpha-demethylase. Mol Biochem Parasitol. 2003 Dec;132(2):75-81. Buckner FS, Joubert BM, Boyle SM, Eastman RT, Verlinde CL, Matsuda SP.                                                                                                                                                                                                                                                                                                                                                                                                                 |
| EAN81270.1                               | sterol 24-c-methyltransferase, putative                              | X                           | Modification of the sterol composition of <i>Trypanosoma (Schizotrypanum) cruzi</i> epimastigotes by delta 24(25)-sterol methyl transferase inhibitors and their combinations with ketoconazole. Mol Biochem Parasitol. 1995 Jul;73(1-2):199-210. Urbina JA, Vivas J, Visbal G, Contreras LM. A solanesyl-diphosphate synthase localizes in glycosomes of <i>Trypanosoma cruzi</i> . J Biol Chem. 2006 Dec 22;281(51):39339-48. Ferella M, Montalvetti A, Rohloff P, Miranda K, Fang J, Reina S, Kawamukai M, Búa J, Nilsson D, Pravia C, Katzin A, Cassera MB, Aslund L, Andersson B, Docampo R, Bontempi EJ.        |
| EAN80692.1                               | solanesyl diphosphate synthase (annotation: farnesyl synthetase) (3) | glycosome*                  | <i>Trypanosoma brucei</i> oleate desaturase may use a cytochrome b5-like domain in another desaturase as an electron donor. J Parasitol. 2006 Oct;92(5):1064-74. Guillermo A. Petri, Silvia G. Altabe and Antonio D. Uttaro                                                                                                                                                                                                                                                                                                                                                                                           |
| EAN95821.1                               | fatty acid desaturase, putative (1)                                  | X                           | Fatty acid synthesis by elongases in trypanosomes. Cell. 2006 Aug 25;126(4):691-9. Lee SH, Stephens JL, Paul KS, Englund PT. Elongation of polyunsaturated fatty acids in trypanosomatids. FEBS J. 2007 Jan;274(1):264-74. Livore VI, Tripodi KE, Uttaro AD.                                                                                                                                                                                                                                                                                                                                                          |
| EAN92121.1                               | fatty acid elongase, putative (3)                                    | ER                          | In silico prediction of the glycosomal enzymes of <i>Leishmania major</i> and trypanosomes. Mol Biochem Parasitol. 2006 Jun;147(2):193-206. Onperdoes FR, Szikora JP.                                                                                                                                                                                                                                                                                                                                                                                                                                                 |
| EAN85395.1                               | 3-ketoacyl-CoA thiolase, putative                                    | glycosome                   | same as previous                                                                                                                                                                                                                                                                                                                                                                                                                                                                                                                                                                                                      |
| EAN92450.1                               | thiolase protein-like protein, putative                              | glycosome                   | N/A, although NADPH cytochrome P450 reductase activities are present. NADPH-cytochrome c reductases of <i>Trypanosoma cruzi</i> . Biochem Biophys Res Commun. 1984 Oct 15;124(1):121-4. Kuwahara T, White RA Jr, Agosin M.                                                                                                                                                                                                                                                                                                                                                                                            |
| EAN81547.1                               | NAD(P)-dependent steroid dehydrogenase protein, putative (1)         | ER/mitochondria             | N/A /// Crystallization and X-ray diffraction analysis of peroxisomal Delta3-Delta2-enoyl-CoA isomerase from <i>Saccharomyces cerevisiae</i> . Acta Crystallogr D Biol Crystallogr. 2000 Aug;56(Pt 8):1020-3. Mursula AM, van Aalten DM, Modis Y, Hiltunen JK, Wierzena RK.                                                                                                                                                                                                                                                                                                                                           |
| EAN82883.1                               | 3,2-trans-enoyl-CoA isomerase, mitochondrial precursor, putative     | mitochondrion               | Not studied in trypanosomatids, although NADPH cytochrome c reductase activities are present. NADPH-cytochrome c reductases of <i>Trypanosoma cruzi</i> . Biochem Biophys Res Commun. 1984 Oct 15;124(1):121-4. Kuwahara T, White RA Jr, Agosin M.                                                                                                                                                                                                                                                                                                                                                                    |
| EAN81369.1                               | 3-oxo-5-alpha-steroid 4-dehydrogenase, putative                      | ER/mitochondria             | Identification of a novel prostaglandin f(2alpha) synthase in <i>Trypanosoma brucei</i> . J Exp Med. 2000 Nov 6;192(9):1327-38. Kubata BK, Duszenko M, Kabutu Z, Rawer M, Szallies A, Fujimori K, Inui T, Nozaki T, Yamashita K, Horii T, Urade Y, Hayaishi O. // Thromboxane A2 is a key regulator of pathogenesis during <i>Trypanosoma cruzi</i> infection. J Exp Med. 2007 Apr 16;204(4):929-40. Ashton AW, Mukherjee S, Nagajyothi FN, Huang H, Braunstein VL, Desruisseaux MS, Factor SM, Lopez L, Berman JW, Wittner M, Scherer PE, Capra V, Coffman TM, Serhan CN, Gotlinger K, Wu KK, Weiss LM, Tanowitz HB. |
| EAN95757.1                               | prostaglandin F2alpha synthase                                       | mitochondrion               | N/A. Aldo/Keto reductase conserved domain. // Human aldo-keto reductases: Function, gene regulation, and single nucleotide polymorphisms. Arch Biochem Biophys. 2007 Aug 15;464(2):241-50. Penning TM, Drury JE. // Thromboxane A2 is a key regulator of pathogenesis during <i>Trypanosoma cruzi</i> infection. J Exp Med. 2007 Apr 16;204(4):929-40. Ashton AW, Mukherjee S, Nagajyothi FN, Huang H, Braunstein VL, Desruisseaux MS, Factor SM, Lopez L, Berman JW, Wittner M, Scherer PE, Capra V, Coffman TM, Serhan CN, Gotlinger K, Wu KK, Weiss LM, Tanowitz HB.                                               |
| EAN92511.1                               | prostaglandin F synthase, putative                                   | X                           | N/A /// Thia fatty acids, metabolism and metabolic effects. Biochim Biophys Acta. 1997 Jan 21;1344(2):115-31. Skrede S, Sorensen HN, Larsen LN, Steinger HH, Hovik K, Spydevold OS, Horn R, Bremer J.                                                                                                                                                                                                                                                                                                                                                                                                                 |
| EAN92888.1                               | acyl-CoA dehydrogenase, putative                                     | cytoplasm/<br>mitochondrion | Evidence for a trypanothione-dependent peroxidase system in <i>Trypanosoma cruzi</i> . Free Radic Biol Med. 2000 Mar 1;28(5):767-72. Lopez JA, Carvalho TU, de Souza W, Flohé L, Guerrero SA, Montemartini M, Kalisz HM, Nococeke E, Singh M, Alves MJ, Colli W.                                                                                                                                                                                                                                                                                                                                                      |
| <b>THIOL METABOLISM</b>                  |                                                                      | <b>2</b>                    | Reduction of anti-leishmanial pentavalent antimonial drugs by a parasite-specific thiol-dependent reductase, TDR1. Biochem J. 2004 Jul 15;381(Pt 2):405-12. Denton H, McGregor JC, Coombs GH.                                                                                                                                                                                                                                                                                                                                                                                                                         |
| EAN80947.1                               | trypanothione peroxidase, putative                                   | cytoplasm/<br>mitochondrion |                                                                                                                                                                                                                                                                                                                                                                                                                                                                                                                                                                                                                       |
| EAN93034.1                               | thiol-dependent reductase 1, putative                                | X                           |                                                                                                                                                                                                                                                                                                                                                                                                                                                                                                                                                                                                                       |
| <b>ENERGY METABOLISM</b>                 |                                                                      | <b>9</b>                    |                                                                                                                                                                                                                                                                                                                                                                                                                                                                                                                                                                                                                       |
| EA000028.1                               | citrate synthase, putative (3)                                       | mitochondrion               | The citrate synthase from <i>Trypanosoma cruzi</i> . J Parasitol. 1977 Oct;63(5):921-2. Juan SM, Cazzulo JJ, Segura EL.                                                                                                                                                                                                                                                                                                                                                                                                                                                                                               |
| EA000045.1                               | aconitase, putative                                                  | mitochondrion               | Mitochondrial superoxide radicals mediate programmed cell death in <i>Trypanosoma cruzi</i> : cytoprotective action of mitochondrial iron superoxide dismutase overexpression. Biochem J. 2007 Apr 15;403(2):323-34. Piacenza L, Irigoin F, Alvarez MN, Peluffo G, Taylor MC, Kelly JM, Wilkinson SR, Radi R.                                                                                                                                                                                                                                                                                                         |
| EAN99748.1                               | isocitrate dehydrogenase, putative                                   | mitochondrion               | Differential energetic metabolism during <i>Trypanosoma cruzi</i> differentiation. I. Citrate synthase, NADP-isocitrate dehydrogenase, and succinate dehydrogenase. Arch Biochem Biophys. 1988 Nov 15;267(1):252-61. Adroher FJ, Osuna A, Lupiañez JA.                                                                                                                                                                                                                                                                                                                                                                |
| EAN96732.1                               | succinyl-CoA ligase [GDP-forming] beta-chain, putative               | mitochondrion               | Porphyrin biosynthesis in parasitic hemoflagellates: functional and defective enzymes in <i>Trypanosoma cruzi</i> . Comp Biochem Physiol B. 1982;72(4):663-7. Salzman TA, Stella AM, Wider de Xifra EA, Batlle AM, Docampo R, Stoppani AO.                                                                                                                                                                                                                                                                                                                                                                            |
| EAN98983.1                               | succinyl-CoA synthetase alpha subunit, putative                      | mitochondrion               | same as previous                                                                                                                                                                                                                                                                                                                                                                                                                                                                                                                                                                                                      |
| EAN86067.1                               | acetyl:succinate CoA-transferase                                     | mitochondrion               | Annotated as succinyl-CoA:3-ketoacid-coenzyme A transferase. // Acetyl:succinate CoA-transferase in procyclic <i>Trypanosoma brucei</i> . Gene identification and role in carbohydrate metabolism. J Biol Chem. 2004 Oct 29;279(44):45337-46. Rivière L, van Weelden SW, Glass P, Vegh P, Coustou V, Biran M, van Hellemond JJ, Bringaud F, Tielen AG, Boshart M.                                                                                                                                                                                                                                                     |
| EAN84275.1                               | succinate dehydrogenase, putative (iron-sulfur subunit) (3)          | mitochondrion               | Differential energetic metabolism during <i>Trypanosoma cruzi</i> differentiation. I. Citrate synthase, NADP-isocitrate dehydrogenase, and succinate dehydrogenase. Arch Biochem Biophys. 1988 Nov 15;267(1):252-61. Adroher FJ, Osuna A, Lupiañez JA.                                                                                                                                                                                                                                                                                                                                                                |
| EAN87573.1                               | succinate dehydrogenase flavoprotein, putative                       | mitochondrion               | same as previous                                                                                                                                                                                                                                                                                                                                                                                                                                                                                                                                                                                                      |
| EAN87359.1                               | mitochondrial malate dehydrogenase, putative                         | mitochondrion*              | Glycosomal and mitochondrial malate dehydrogenases in epimastigotes of <i>Trypanosoma cruzi</i> . Mol Biochem Parasitol. 1984 Apr;11:37-49. Cannata JJ, Cazzulo JJ.                                                                                                                                                                                                                                                                                                                                                                                                                                                   |
| <b>ELECTRON CARRIERS &amp; TRANSPORT</b> |                                                                      | <b>14</b>                   |                                                                                                                                                                                                                                                                                                                                                                                                                                                                                                                                                                                                                       |
| EAN85971.1                               | NADH-cytochrome b5 reductase, putative                               | mitochondrion               | Overexpression of a cytochrome b5 reductase-like protein causes kinetoplast DNA loss in <i>Trypanosoma brucei</i> . J Biol Chem. 2006 Jul 7;281(27):18499-506. Motyka SA, Drew ME, Yildirim G, Englund PT.                                                                                                                                                                                                                                                                                                                                                                                                            |
| EAN81327.1                               | cytochrome-b5 reductase, putative                                    | mitochondrion               | same as previous                                                                                                                                                                                                                                                                                                                                                                                                                                                                                                                                                                                                      |
| EAN97131.1                               | cytochrome p450-like protein, putative (3)                           | X                           | CYP51 from <i>Trypanosoma cruzi</i> : a phyla-specific residue in the B' helix defines substrate preferences of sterol 14alpha-demethylase. J Biol Chem. 2006 Feb 10;281(6):3577-85. Lepesheva GI, Zaitseva NG, Nes WD, Zhou W, Arase M, Liu J, Hill GC, Waterman MR.                                                                                                                                                                                                                                                                                                                                                 |
| EAN89176.1                               | NADH dehydrogenase, putative (2)                                     | mitochondrion               | Identification of a gene encoding a 54 kDa alternative NADH dehydrogenase in <i>Trypanosoma brucei</i> . Mol Biochem Parasitol. 2003 Mar;127(1):73-7. Fang J, Beattie DS.                                                                                                                                                                                                                                                                                                                                                                                                                                             |
| EAN94284.1                               | reiske iron-sulfur protein precursor, putative (2)                   | mitochondrion               | The trypanosomatid Rieske iron-sulfur proteins have a cleaved presequence that may direct mitochondrial import. Biochim Biophys Acta. 1995 Nov 30;1269(3):201-4. Priest JW, Haiduk SL. Post-transcriptional control of nuclear-encoded cytochrome oxidase subunits in <i>Trypanosoma brucei</i> : evidence for genome-wide conservation of life-cycle stage-specific regulatory elements. Nucleic Acids Res. 2006;34(18):5312-24. Mayho M, Fenn K, Craddy P, Crosthwaite S, Matthews K.                                                                                                                               |
| EAN83385.1                               | cytochrome c oxidase VIII (COX VIII), putative (1)                   | mitochondrion               | <i>Trypanosoma brucei</i> cytochrome c1 is imported into mitochondria along an unusual pathway. J Biol Chem. 2003 Apr 25;278(17):15084-94. Priest JW, Haiduk SL.                                                                                                                                                                                                                                                                                                                                                                                                                                                      |
| EAN96063.1                               | cytochrome c1, heme protein, mitochondrial precursor, putative (2)   | mitochondrion               | Post-transcriptional control of nuclear-encoded cytochrome oxidase subunits in <i>Trypanosoma brucei</i> : evidence for genome-wide conservation of life-cycle stage-specific regulatory elements. Nucleic Acids Res. 2006;34(18):5312-24. Mayho M, Fenn K, Craddy P, Crosthwaite S, Matthews K.                                                                                                                                                                                                                                                                                                                      |
| EA000075.1                               | cytochrome c oxidase subunit IV, putative                            | mitochondrion               | Same as previous                                                                                                                                                                                                                                                                                                                                                                                                                                                                                                                                                                                                      |
| EAN86560.1                               | cytochrome c oxidase subunit V, putative                             | mitochondrion               | Same as previous                                                                                                                                                                                                                                                                                                                                                                                                                                                                                                                                                                                                      |
| EAN81211.1                               | cytochrome c oxidase subunit 10, putative                            | mitochondrion               | Same as previous                                                                                                                                                                                                                                                                                                                                                                                                                                                                                                                                                                                                      |
| EAN89655.1                               | cytochrome c oxidase subunit VI, putative (2)                        | mitochondrion               | Same as previous                                                                                                                                                                                                                                                                                                                                                                                                                                                                                                                                                                                                      |
| EAN88371.1                               | glutathione-S-transferase/glutaredoxin, putative                     | reservoirs*                 | <i>Trypanosoma cruzi</i> : a 52-kDa protein sharing sequence homology with glutathione S-transferase is localized in parasite organelles morphologically resembling reservosomes. Exp Parasitol. 1995 Dec;81(4):453-61. Ouassii MA, Dubremetz JF, Schöneck R, Fernandez-Gomez R, Gomez-Corvera R, Billaut-Mulot O, Taibi A, Lovens M, Tartar A, Sengheraert C, et al.                                                                                                                                                                                                                                                 |

|                                               |                                                                                                   |                                                          |                                                                                                                                                                                                                                                                                                                                                                                                                                                                                                                                                                                                                                                                                                                                            |
|-----------------------------------------------|---------------------------------------------------------------------------------------------------|----------------------------------------------------------|--------------------------------------------------------------------------------------------------------------------------------------------------------------------------------------------------------------------------------------------------------------------------------------------------------------------------------------------------------------------------------------------------------------------------------------------------------------------------------------------------------------------------------------------------------------------------------------------------------------------------------------------------------------------------------------------------------------------------------------------|
| EAN89624.1                                    | oxidoreductase, putative                                                                          | mitochondrion                                            | Not described as such but as part of a pathway or complex // Mitochondrial complexes in <i>Trypanosoma brucei</i> : a novel complex and a unique oxidoreductase complex. Mol Cell Proteomics. 2007 Dec 11 Panigrahi AK, Ziková A, Dalley RA, Acestor N, Ogata Y, Anupama A, Myler PJ, Stuart KD.                                                                                                                                                                                                                                                                                                                                                                                                                                           |
| EAN89399.1                                    | nitrate reductase, putative (1)                                                                   | X                                                        | N/A. Identification and localization of enzymes of the fumarate reductase and nitrate respiration systems of <i>Escherichia coli</i> by crossed immunoelectrophoresis. J Bacteriol. 1983 Feb;153(2):1027-37. van der Plas J, Hellingwerf KJ, Seijen HG, Guest JR, Weiner JH, Konings WN.                                                                                                                                                                                                                                                                                                                                                                                                                                                   |
| <b>ATP-PROTON MOTIF FORCE INTERCONVERSION</b> |                                                                                                   |                                                          | <b>7</b>                                                                                                                                                                                                                                                                                                                                                                                                                                                                                                                                                                                                                                                                                                                                   |
| EAN86374.1                                    | ATP synthase F1 subunit gamma protein, putative                                                   | mitochondrion                                            | Influence of efrapentin, aurovertin and citreoviridin on the mitochondrial adenosine triphosphatase from <i>Trypanosoma cruzi</i> . Mol Biochem Parasitol. 1981 Jul;3(3):143-55. Cataldi de Flombaum MA, Stoppani AO. // Cloning and characterization of the subunits comprising the catalytic core of the <i>Trypanosoma brucei</i> mitochondrial ATP synthase. Mol Biochem Parasitol. 2001 Apr 6;113(2):289-301. Brown B SV, Stanislawski A, Perry OL, Williams N.                                                                                                                                                                                                                                                                       |
| EAN97136.1                                    | ATP synthase, epsilon chain, putative                                                             | mitochondrion                                            | same as previous                                                                                                                                                                                                                                                                                                                                                                                                                                                                                                                                                                                                                                                                                                                           |
| EAN81916.1                                    | ATP synthase, alpha chain, mitochondrial precursor, putative                                      | mitochondrion                                            | same as previous                                                                                                                                                                                                                                                                                                                                                                                                                                                                                                                                                                                                                                                                                                                           |
| EAN84918.1                                    | ATPase alpha subunit, putative (2)                                                                | mitochondrion                                            | same as previous                                                                                                                                                                                                                                                                                                                                                                                                                                                                                                                                                                                                                                                                                                                           |
| EAN95983.1                                    | ATPase beta subunit, putative                                                                     | mitochondrion                                            | same as previous                                                                                                                                                                                                                                                                                                                                                                                                                                                                                                                                                                                                                                                                                                                           |
| EAN86373.1                                    | vacuolar ATP synthase, putative (1)                                                               | acidocalcisome*                                          | Similar to subunit C of the vacuolar H <sup>+</sup> -ATPase // Ca <sup>2+</sup> content and expression of an acidocalcisomal calcium pump are elevated in intracellular forms of <i>Trypanosoma cruzi</i> . Mol Cell Biol. 1998 Apr;18(4):2309-23. Zhong L, Lu HG, Moreno SN, Docampo R. Presence of a plant-like proton-pumping pyrophosphatase in acidocalcisomes of <i>Trypanosoma cruzi</i> . J Biol Chem. 1998 Aug 21;273(34):22151-8. Scott DA, de Souza W, Benchimol M, Zhong L, Lu HG, Moreno SN, Docampo R. Cloning and functional expression of a gene encoding a vacuolar-type proton-translocating pyrophosphatase from <i>Trypanosoma cruzi</i> . Biochem J. 2000 Oct 1;351(Pt 1):281-8. Hill JE, Scott DA, Luo S, Docampo R. |
| IEAN91609.1                                   | vacuolar-type proton translocating pyrophosphatase 1, putative                                    | acidocalcisome/CV*                                       |                                                                                                                                                                                                                                                                                                                                                                                                                                                                                                                                                                                                                                                                                                                                            |
| <b>GLYCOLISIS/GLYCOGENESIS</b>                |                                                                                                   |                                                          | <b>9</b>                                                                                                                                                                                                                                                                                                                                                                                                                                                                                                                                                                                                                                                                                                                                   |
| EAN94612.1                                    | hexokinase, putative                                                                              | glycosome*                                               | Molecular and biochemical characterization of hexokinase from <i>Trypanosoma cruzi</i> . Mol Biochem Parasitol. 2003 Feb;126(2):251-62. Cáceres AJ, Portillo R, Acosta H, Rosales D, Quiñones W, Avilan L, Salazar L, Dubourdieu M, Michels PA, Concepción JL.                                                                                                                                                                                                                                                                                                                                                                                                                                                                             |
| EA000202.1                                    | 6-phospho-1-fructokinase, putative                                                                | glycosome                                                | 6-Phosphofructo-2-kinase and fructose-2,6-bisphosphatase in Trypanosomatidae. Molecular characterization, database searches, modelling studies and evolutionary analysis. FEBS J. 2005 Jul;272(14):3542-60. Chevalier N, Bertrand L, Rider MH, Opperdoes FR, Rigden DJ, Michels PA.                                                                                                                                                                                                                                                                                                                                                                                                                                                        |
| EAN90286.1                                    | fructose-bisphosphate aldolase, glycosomal, putative                                              | glycosome                                                | Structure and regulated expression of genes encoding fructose biphosphate aldolase in <i>Trypanosoma brucei</i> . EMBO J. 1985 Nov;4(11):2997-3003. Clayton CE.                                                                                                                                                                                                                                                                                                                                                                                                                                                                                                                                                                            |
| EAN98352.1                                    | glyceraldehyde 3-phosphate dehydrogenase, putative                                                | glycosome                                                | <i>Trypanosoma cruzi</i> glycosomal glyceraldehyde-3-phosphate dehydrogenase does not conform to the 'hotspot' topogenic signal model. EMBO J. 1990 Sep;9(9):2751-8. Kendall G, Wilderspin AF, Ashall F, Miles MA, Kelly JM.                                                                                                                                                                                                                                                                                                                                                                                                                                                                                                               |
| EAN99050.1                                    | phosphoglycerate kinase, putative (1)                                                             | glycosome/cytoplasm*                                     | The expression and intracellular distribution of phosphoglycerate kinase isoenzymes in <i>Trypanosoma cruzi</i> . Mol Biochem Parasitol. 2001 Nov;118(1):111-21. Concepción JL, Adjé CA, Quiñones W, Chevalier N, Dubourdieu M, Michels PA.                                                                                                                                                                                                                                                                                                                                                                                                                                                                                                |
| EAN91697.1                                    | PAS-domain containing phosphoglycerate kinase, putative (PAS domain could be a miss-assembly) (2) | glycosome/cytoplasm*                                     | same as previous                                                                                                                                                                                                                                                                                                                                                                                                                                                                                                                                                                                                                                                                                                                           |
| EAN86096.1                                    | pyruvate phosphate dikinase, putative                                                             | glycosome*                                               | Cloning of a pyruvate phosphate dikinase from <i>Trypanosoma cruzi</i> . Mol Biochem Parasitol. 2001 Feb;112(2):183-91. Maldonado RA, Fairlamb AH.                                                                                                                                                                                                                                                                                                                                                                                                                                                                                                                                                                                         |
| EAN88964.1                                    | glycosomal phosphoenolpyruvate carboxykinase, putative                                            | glycosome*                                               | Cloning and characterization of the gene encoding ATP-dependent phospho-enol-pyruvate carboxykinase in <i>Trypanosoma cruzi</i> : comparison of primary and predicted secondary structure with host GTP-dependent enzyme. Gene. 1993 Dec 22;136(1-2):69-77. Linss J, Goldenberg S, Urbina JA, Amzel LM.                                                                                                                                                                                                                                                                                                                                                                                                                                    |
| EAN90616.1                                    | glycosomal malate dehydrogenase, putative                                                         | glycosome*                                               | Glycosomal and mitochondrial malate dehydrogenases in epimastigotes of <i>Trypanosoma cruzi</i> . Mol Biochem Parasitol. 1984 Apr;11:37-49. Cannata JJ, Cazzulo JJ.                                                                                                                                                                                                                                                                                                                                                                                                                                                                                                                                                                        |
| <b>PYRUVATE DEHYDROGENASE COMPLEX</b>         |                                                                                                   |                                                          | <b>5</b>                                                                                                                                                                                                                                                                                                                                                                                                                                                                                                                                                                                                                                                                                                                                   |
| EAN92220.1                                    | pyruvate dehydrogenase E1 component alpha subunit, putative                                       | mitochondrion                                            | A putative pyruvate dehydrogenase alpha subunit gene from <i>Trypanosoma cruzi</i> . Biochim Biophys Acta. 1996 Nov 11;1309(1-2):53-7. Buscaglia CA, Pollewick GD, Veloso C, Lorca M, Frasch AC, Sánchez DO.                                                                                                                                                                                                                                                                                                                                                                                                                                                                                                                               |
| EAN89795.1                                    | pyruvate dehydrogenase E1 beta subunit, putative                                                  | mitochondrion                                            | Same as previous                                                                                                                                                                                                                                                                                                                                                                                                                                                                                                                                                                                                                                                                                                                           |
| EAN90443.1                                    | dihydrolipoil dehydrogenase, putative                                                             | mitochondrion                                            | Cloning, sequencing and functional expression of dihydrolipoamide dehydrogenase from the human pathogen <i>Trypanosoma cruzi</i> . Eur J Biochem. 1997 Feb 1;243(3):739-47. Schöneck R, Billaut-Mulot O, Numrich P, Ouassii MA, Krauth-Siegel RL. // Lipoamide dehydrogenase from <i>Trypanosoma cruzi</i> : some properties and cellular localization. Biochem Int. 1991 May;24(1):147-55. Portela MP, Stoppani AO.                                                                                                                                                                                                                                                                                                                       |
| EAN93711.1                                    | dihydrolipoamide acetyltransferase precursor, putative                                            | mitochondrion                                            | N/A. Cloning and characterization of the dihydrolipoamide S-acetyltransferase subunit of the plastid pyruvate dehydrogenase complex (E2) from <i>Arabidopsis</i> . Plant Physiol. 1999 Jun;120(2):443-52. Mooney BP, Miernyk JA, Randall DD.                                                                                                                                                                                                                                                                                                                                                                                                                                                                                               |
| EAN81897.1                                    | 2-oxoglutarate dehydrogenase, E2 component, dihydrolipoamide succinyltransferase                  | mitochondrion                                            | Dihydrolipoamide dehydrogenase from <i>Trypanosoma brucei</i> . Characterization and cellular location. Biochem J. 1987 May 1; 243(3): 661-665. M J Danson, K Conroy, A McQuattie, and K J Stevenson.                                                                                                                                                                                                                                                                                                                                                                                                                                                                                                                                      |
| <b>CELL STRUCTURE &amp; MOTILITY</b>          |                                                                                                   |                                                          |                                                                                                                                                                                                                                                                                                                                                                                                                                                                                                                                                                                                                                                                                                                                            |
| <b>CELLULAR ORGANIZATION</b>                  |                                                                                                   |                                                          | <b>18</b>                                                                                                                                                                                                                                                                                                                                                                                                                                                                                                                                                                                                                                                                                                                                  |
| EAN94839.1                                    | beta tubulin, putative                                                                            | cytoskeleton/ flagellar and sub-pellicular microtubules* | Tight binding between a pool of the heterodimeric alpha/beta tubulin and a protein kinase CK2 in <i>Trypanosoma cruzi</i> epimastigotes. Parasitology. 2006 Apr;132(Pt 4):511-23. De Lima AR, Medina R, Uzcanga GL, Noris Suárez K, Contreras VT, Navarro MC, Arteaga R, Bubis J// New tubulins in protozoal parasites. Curr Biol. 2000 Apr 6;10(7):R258-9. Vaughan S, Attwood T, Navarro M, Scott V, McKean P, Gull K.                                                                                                                                                                                                                                                                                                                    |
| EAN81053.1                                    | alpha tubulin, putative                                                                           | cytoskeleton/ flagellar and sub-pellicular microtubules* | same as previous // Acetylated alpha-tubulin in <i>Trypanosoma cruzi</i> : immunocytochemical localization. Mem Inst Oswaldo Cruz. 1993 88(4):517-28. Souto-Padron T, Cunha e Silva NL, de Souza W.                                                                                                                                                                                                                                                                                                                                                                                                                                                                                                                                        |
| EAN85411.1                                    | actin, putative                                                                                   | cytoskeleton*                                            | <i>Trypanosoma cruzi</i> : allelic comparisons of the actin genes and analysis of their transcripts. Exp Parasitol. 2003 Jan-Feb;103(1-2):27-34. Cevallos AM, López-Villaseñor I, Espinosa N, Herrera J, Hernández R. <i>Trypanosoma cruzi</i> : distribution of fluorescently labeled tubulin and actin in epimastigotes. J Parasitol. 1983 Feb;69(1):138-42. de Souza W, Meza I, Martínez-Palomo A, Sabanero M, Souto-Padrón T, Meirelles MN.                                                                                                                                                                                                                                                                                            |
| EAN91961.1                                    | actin-like protein, putative (1)                                                                  | cytoskeleton                                             | Studies on trypanosomatid actin. I. Immunohistochemical and biochemical identification. J Protozool. 1989 Jan-Feb;36(1):8-13. Mortara RA.                                                                                                                                                                                                                                                                                                                                                                                                                                                                                                                                                                                                  |
| EAN82002.1                                    | cytoskeleton-associated protein CAP5.5, putative                                                  | cytoskeleton                                             | CAP5.5, a life-cycle-regulated, cytoskeleton-associated protein is a member of a novel family of calpain-related proteins in <i>Trypanosoma brucei</i> . Mol Biochem Parasitol. 2001 Aug;116(1):25-34. Erratum in: Mol Biochem Parasitol 2001 Sep 28;117(1):119. Hertz-Fowler C, Ersfeld K, Gull K. Stuck in reverse: loss of LCI in <i>Trypanosoma brucei</i> disrupts outer dynein arms and leads to reverse flagellar beat and backward movement. Journal of Cell Science 120, 1513-1520 (2007)                                                                                                                                                                                                                                         |
| EAN96878.1                                    | dynein, putative                                                                                  | cytoskeleton/ flagellum                                  | Desiree M. Baron, Zakavi P. Kabutuutu and Kent L. Hill                                                                                                                                                                                                                                                                                                                                                                                                                                                                                                                                                                                                                                                                                     |
| EAN85813.1                                    | dynein light chain, putative (2)                                                                  | cytoskeleton/flagellum                                   | same as previous                                                                                                                                                                                                                                                                                                                                                                                                                                                                                                                                                                                                                                                                                                                           |
| EAN87401.1                                    | dynein intermediate chain, putative                                                               | cytoskeleton/flagellum                                   | same as previous                                                                                                                                                                                                                                                                                                                                                                                                                                                                                                                                                                                                                                                                                                                           |
| EAN92318.1                                    | 69 kDa paraflagellar rod protein, putative                                                        | flagellum*                                               | Evidence for two distinct major protein components, PAR 1 and PAR 2, in the paraflagellar rod of <i>Trypanosoma cruzi</i> . Complete nucleotide sequence of PAR. Beard, C. A., Sahorio, J. L., Tewari, D., Krieglstein, K. G., Henschen, A. H., and Manning, J. E. (1992) J. Biol. Chem. 267,21656-21662                                                                                                                                                                                                                                                                                                                                                                                                                                   |
| EAN87979.1                                    | paraflagellar rod protein 3, putative                                                             | flagellum*                                               | // Evidence for four distinct major protein components in the paraflagellar rod of <i>Trypanosoma cruzi</i> . J Biol Chem. 1998 Aug 21;273(34):21846-55. Fouts DL, Stryker GA, Gorski KS, Miller MJ, Neuen TV, Wrightsman RA, Manning JE.                                                                                                                                                                                                                                                                                                                                                                                                                                                                                                  |
| EAN81200.1                                    | paraxonemal rod protein PAR2, putative                                                            | flagellum*                                               | same as previous                                                                                                                                                                                                                                                                                                                                                                                                                                                                                                                                                                                                                                                                                                                           |
| EAN83974.1                                    | paraflagellar rod component Par4, putative                                                        | flagellum*                                               | same as previous                                                                                                                                                                                                                                                                                                                                                                                                                                                                                                                                                                                                                                                                                                                           |
| EAN99876.1                                    | paraflagellar rod component, putative                                                             | flagellum*                                               | same as previous                                                                                                                                                                                                                                                                                                                                                                                                                                                                                                                                                                                                                                                                                                                           |
| EAN85233.1                                    | axoneme central apparatus protein, putative                                                       | flagellum                                                | N/A. The Parkin co-regulated gene product, PACRG, is an evolutionarily conserved axonemal protein that functions in outer-doublet microtubule morphogenesis. J Cell Sci. 2005 Dec 1;118(Pt 23):5421-30. Dawe HR, Farr H, Portman N, Shaw MK, Gull K.                                                                                                                                                                                                                                                                                                                                                                                                                                                                                       |

|                                                     |                                                             |                                            |                                                                                                                                                                                                                                                                                                                                                                                                                                                                                                                                                                                                                                                                                                                                                                                                                                                                                                                  |
|-----------------------------------------------------|-------------------------------------------------------------|--------------------------------------------|------------------------------------------------------------------------------------------------------------------------------------------------------------------------------------------------------------------------------------------------------------------------------------------------------------------------------------------------------------------------------------------------------------------------------------------------------------------------------------------------------------------------------------------------------------------------------------------------------------------------------------------------------------------------------------------------------------------------------------------------------------------------------------------------------------------------------------------------------------------------------------------------------------------|
| EAN83903.1                                          | flagellar protofilament ribbon protein, putative (1)        | flagellum                                  | N/A. The Rib43a protein is associated with forming the specialized protofilament ribbons of flagellar microtubules in <i>Chlamydomonas</i> . Mol Biol Cell. 2000 Jan;11(1):201-15. Norrander JM, deCathelineau AM, Brown JA, Porter ME, Linck RW.                                                                                                                                                                                                                                                                                                                                                                                                                                                                                                                                                                                                                                                                |
| EAN87014.1                                          | kinetoplastid membrane protein KMP-11                       | flagellum/ flagellar pocket/ cytoskeleton* | Molecular characterization of KMP11 from <i>Trypanosoma cruzi</i> : a cytoskeleton-associated protein regulated at the translational level. DNA Cell Biol. 2000 19 (1):47-57. M C Thomas , J L Garcia-Pérez , C Alonso , M C López                                                                                                                                                                                                                                                                                                                                                                                                                                                                                                                                                                                                                                                                               |
| EAN91318.1                                          | I/6 autoantigen, putative                                   | cytoskeleton                               | The <i>Trypanosoma brucei</i> autoantigen I/6 is an internally repetitive cytoskeletal protein. Eur J Cell Biol. 1997 Apr;72(4):378-84. Detmer E, Hemphill A, Müller N, Seebeck T.                                                                                                                                                                                                                                                                                                                                                                                                                                                                                                                                                                                                                                                                                                                               |
| EAN89775.1                                          | NUP-1 protein, putative (2)                                 | cytoskeleton/nucleus                       | Isolation and characterization of subnuclear compartments from <i>Trypanosoma brucei</i> . Identification of a major repetitive nuclear lamina component. J Biol Chem. 2001 Oct 12;276(41):38261-71. Rout MP, Field MC.                                                                                                                                                                                                                                                                                                                                                                                                                                                                                                                                                                                                                                                                                          |
| <b>CELL ADHESION</b>                                |                                                             | <b>2</b>                                   |                                                                                                                                                                                                                                                                                                                                                                                                                                                                                                                                                                                                                                                                                                                                                                                                                                                                                                                  |
| EAN84330.1                                          | mucin-associated surface protein (MASP), putative (1)       | PM                                         | Glycoproteomics of <i>Trypanosoma cruzi</i> trypomastigotes using subcellular fractionation, lectin affinity, and stable isotope labeling. J Proteome Res. 2006 Dec;5(12):3376-84. Atwood JA 3rd, Minning T, Ludolf F, Nuccio A, Weatherly DB, Alvarez-Manilla G, Tarleton R, Orlando R. Incorporation of sialic acid into <i>Trypanosoma cruzi</i> macromolecules. A proposal for a new metabolic route. Mol Biochem Parasitol. 1985 Jun;16(1):85-96. Previato JO, Andrade AF, Pessolani MC, Mendonça-Previato L.// Functional diversity in the trans-sialidase and mucin families in <i>Trypanosoma cruzi</i> . Parasitol Today. 2000 Jul;16(7):282-6. Frasch AC.                                                                                                                                                                                                                                              |
| EAN86366.1                                          | trans-sialidase, putative (1)                               | PM*                                        |                                                                                                                                                                                                                                                                                                                                                                                                                                                                                                                                                                                                                                                                                                                                                                                                                                                                                                                  |
| <b>CELL CYCLE AND DIVISION</b>                      |                                                             | <b>5</b>                                   |                                                                                                                                                                                                                                                                                                                                                                                                                                                                                                                                                                                                                                                                                                                                                                                                                                                                                                                  |
| EAN88839.1                                          | prohibitin, putative (1)                                    | mitochondrion                              | Prohibitin and RACK homologues are up-regulated in trypanosomes induced to undergo apoptosis and in naturally occurring terminally differentiated forms. Cell Death Differ. 1998 Jul;5(7):615-22. Welburn SC, Murph NB.                                                                                                                                                                                                                                                                                                                                                                                                                                                                                                                                                                                                                                                                                          |
| EAN86375.1                                          | centromere/microtubule binding protein cbf5, putative       | cytoskeleton/ Nucleus, nucleolus           | Elucidating the role of H/ACA-like RNAs in trans-splicing and rRNA processing via RNA interference silencing of the <i>Trypanosoma brucei</i> CBF5 pseudouridine synthase. J Biol Chem. 2005 Oct 14;280(41):34558-68. Barth S, Hury A, Liang XH, Michaeli S, PF01145: The band 7 protein is an integral membrane protein which is thought to regulate cation conductance. A variety of proteins belong to this family. These include the <b>prohibitins</b> , cytoplasmic anti-proliferative proteins and stomatin, an erythrocyte membrane protein. Bacterial HHC protein also belongs to this family. <b>cd03403: Band 7 stomatin like</b> // The SPFH domain-containing proteins: more than lipid raft markers.Trends Cell Biol. 2007 Aug;17(8):394-402. Epub 2007 Sep 4. Review. Browman DT, Hoegg MB, Robbins SM.                                                                                           |
| EAN87051.1                                          | SPFH domain / Band 7 family protein, putative (1)           | X                                          | The 14-3-3 proteins of <i>Trypanosoma brucei</i> function in motility, cytokinesis, and cell cycle. J Biol Chem. 2005 Apr 8;280(14):14085-96. Inoue M, Nakamura Y, Yasuda K, Yasaka N, Hara T, Schnauffer A, Stuart K, Fukuma T.                                                                                                                                                                                                                                                                                                                                                                                                                                                                                                                                                                                                                                                                                 |
| EAN91936.1                                          | 14-3-3 protein, putative                                    | X                                          | Identification of guanine nucleotide binding proteins from <i>Trypanosoma cruzi</i> . Biol Res. 1993;26(1):217-88. Bubis J, Millan EJ, Martínez R.                                                                                                                                                                                                                                                                                                                                                                                                                                                                                                                                                                                                                                                                                                                                                               |
| EAN99629.1                                          | developmentally regulated GTP-binding protein, putative (1) | cytoplasm / endosomes                      |                                                                                                                                                                                                                                                                                                                                                                                                                                                                                                                                                                                                                                                                                                                                                                                                                                                                                                                  |
| <b>REPLICATION / TRANSCRIPTION</b>                  |                                                             | <b>10</b>                                  |                                                                                                                                                                                                                                                                                                                                                                                                                                                                                                                                                                                                                                                                                                                                                                                                                                                                                                                  |
| <b>REPLICATION / DNA REPAIR / DNA BINDING</b>       |                                                             | <b>10</b>                                  |                                                                                                                                                                                                                                                                                                                                                                                                                                                                                                                                                                                                                                                                                                                                                                                                                                                                                                                  |
| EAN81533.1                                          | histone H4, putative                                        | nucleus*                                   | Trypanosomatid histones.Mol Microbiol. 2004 Jul;53(2):365-72. Alsford S, Horn D. // Post-translational modifications of <i>Trypanosoma cruzi</i> histone H4. Mol Biochem Parasitol. 2006 Dec;150(2):268-77. da Cunha JP, Nakayasu ES, de Almeida IC, Schenkman S.                                                                                                                                                                                                                                                                                                                                                                                                                                                                                                                                                                                                                                                |
| EAN83533.1                                          | histone H2B, putative                                       | nucleus*                                   | Same as previous // Presence of histone H2B in <i>Trypanosoma cruzi</i> chromatin. Biol Res. 1993;26(1-2):41-6. Toro GC, Wernstedt C, Hellman U, Galanti N.                                                                                                                                                                                                                                                                                                                                                                                                                                                                                                                                                                                                                                                                                                                                                      |
| EAN85330.1                                          | histone H2A, putative                                       | nucleus*                                   | Same as previous // Control mechanisms of the H2A genes expression in <i>Trypanosoma cruzi</i> . Mol Biochem Parasitol. 1998 May 1;92(2):313-24. Marañón C, Puerta C, Alonso C, López MC. Same as previous // Genes for histone H3 in <i>Trypanosoma cruzi</i> . Mol Biochem Parasitol. 1994 Jul;66(1):147-51. Bontempi EJ, Porcel BM, Henriksson J, Carlsson I, Rydåker M, Segura EL, Ruiz AM, Pettersson U. // A variant histone H3 is enriched at telomeres in <i>Trypanosoma brucei</i> . J Cell Sci. 2004 Nov 15;117(Pt 24):5937-47. Lowell JE, Cross GA.                                                                                                                                                                                                                                                                                                                                                   |
| EAN84604.1                                          | histone H3, putative                                        | nucleus*                                   | Stage specific kinetoplast DNA-binding proteins in <i>Trypanosoma cruzi</i> . Acta Trop. 2000 Sep 18;76(2):139-46. Zavala-Castro JE, Acosta-Viana K, Guzmán-Marín E, Rosado-Barrera ME, Rosales-Encina JL. // Kinetoplast DNA-binding protein profile in the epimastigote form of <i>Trypanosoma cruzi</i> . Arch Med Res. 2002 May-Jun;33(3):250-6. Zavala-Castro JE, Acosta-Viana K, Baylon-Pacheco L, González-Robles A, Guzmán-Marín E, Rosales-Encina JL. In situ hybridization to the <i>Criethidia fasciculata</i> kinetoplast reveals two antipodal sites involved in kinetoplast DNA replication. Cell 70:621-629, 1992. Ferguson, M, Torri, A.F., Ward, D.C., and Englund, P.T. // <i>Trypanosoma brucei</i> has two distinct mitochondrial DNA polymerase enzymes. Biol. Chem., Vol. 278, Issue 49, 49095-49101, 2003 Tina T. Sasowsky, Gunjan Choudhary, Michele M. Klingbeil, and Paul T. EnglundJ. |
| EAN85210.1                                          | kinetoplast DNA-associated protein, putative (2)            | kinetoplast*                               | Localization of a type II DNA topoisomerase to two sites at the periphery of the kinetoplast DNA of <i>Criethidia fasciculata</i> . Cell 55:1083-1088, 1988.Melendy, T., Sheline, C., and Ray, D.S.                                                                                                                                                                                                                                                                                                                                                                                                                                                                                                                                                                                                                                                                                                              |
| EAN91887.1                                          | mitochondrial DNA polymerase beta, putative                 | mitochondrion                              | N/A. The RuvABC resolvosome. Eur J Biochem. 2002 Nov;269(22):5492-501. Dickman MJ, Ingleston SM, Sedelnikova SE, Rafferty JB, Llovd RG, Grasby JA, Hornby DP.                                                                                                                                                                                                                                                                                                                                                                                                                                                                                                                                                                                                                                                                                                                                                    |
| EAN91964.1                                          | mitochondrial DNA topoisomerase II, putative (1)            | mitochondrion                              | A type I DNA topoisomerase from <i>Trypanosoma cruzi</i> . Eur J Biochem. 1983 Aug 15;134(3):479-84. Riou GF, Gabillot M, Douc-Rasy S, Kayser A, Barrois M. // Purification and nuclear localization of a type I topoisomerase from <i>Criethidia fasciculata</i> . Mol Biochem Parasitol. 1987 Jun;24(2):215-25. Melendy T, Ray DS.                                                                                                                                                                                                                                                                                                                                                                                                                                                                                                                                                                             |
| EAN94547.1                                          | RuvB-like DNA helicase, putative (1)                        | nucleus                                    | N/A // The compaction pattern of the chromatin of trypanosomes. Biol Cell. 1985;53(3):199-208. Hecker H, Gander ES.                                                                                                                                                                                                                                                                                                                                                                                                                                                                                                                                                                                                                                                                                                                                                                                              |
| EAN90819.1                                          | DNA topoisomerase IA, putative (1)                          | nucleus*                                   |                                                                                                                                                                                                                                                                                                                                                                                                                                                                                                                                                                                                                                                                                                                                                                                                                                                                                                                  |
| EAN84364.1                                          | nucleosome assembly protein-like protein, putative          | nucleus                                    |                                                                                                                                                                                                                                                                                                                                                                                                                                                                                                                                                                                                                                                                                                                                                                                                                                                                                                                  |
| <b>TRANSCRIPTION / RNA PROCESSING / RNA BINDING</b> |                                                             | <b>11</b>                                  |                                                                                                                                                                                                                                                                                                                                                                                                                                                                                                                                                                                                                                                                                                                                                                                                                                                                                                                  |
| EAN92280.1                                          | ATP-dependent DEAD/H RNA helicase, putative                 | nucleus / cytoplasm                        | DEAD-box protein HEL64 from <i>Trypanosoma brucei</i> : subcellular localization and gene knockout analysis. Parasitol Res. 1999 85(4):324-30. Missel A, Lambert L, Nörskau G, Göringer HU. // An unusual Dicer-like protein fuels the RNA interference pathway in <i>Trypanosoma brucei</i> . RNA. 2006 Dec;12(12):2063-72. Shi H, Tschudi C, Ullu E.                                                                                                                                                                                                                                                                                                                                                                                                                                                                                                                                                           |
| EAN99758.1                                          | poly(A)-binding protein, putative                           | cytoplasm / nucleus                        | Poly(A)-binding protein I of <i>Leishmania</i> : functional analysis and localisation in trypanosomatid parasites. Nucleic Acids Res. 2000 Mar 1;28(5):1211-20. Bates EJ, Kneuper E, Smith DF.                                                                                                                                                                                                                                                                                                                                                                                                                                                                                                                                                                                                                                                                                                                   |
| EAN86151.1                                          | RNA helicase, putative                                      | X                                          | <i>Trypanosoma brucei</i> mitochondria contain RNA helicase activity.Nucleic Acids Res. 1994 Oct 11;22(20):4050-6. Missel A, Göringer HU. // Purification of a functional enzymatic editing complex from <i>Trypanosoma brucei</i> mitochondria. EMBO J. 1997 Jul 1;16(13):4069-81. Rusché LN, Cruz-Reves J, Piller KJ, Sollner-Webb B.                                                                                                                                                                                                                                                                                                                                                                                                                                                                                                                                                                          |
| EAN92507.1                                          | fibrillarin, putative (1)                                   | nucleus                                    | RNA B is the major nucleolar trimethylguanosine-capped small nuclear RNA associated with fibrillarin and pre-rRNAs in <i>Trypanosoma brucei</i> . Mol Cell Biol. 1993 Jan;13(1):144-54. Hartshorne T, Agabian N. // Fibrillarin-associated box C/D small nucleolar RNAs in <i>Trypanosoma brucei</i> . Sequence conservation and implications for 2'-O-ribose methylation of rRNA. J Biol Chem. 2000 May 12;275(19):14767-76. Dunbar DA, Wormsley S, Lowe TM, Baserga SJ.                                                                                                                                                                                                                                                                                                                                                                                                                                        |
| EAN96121.1                                          | RNA-binding protein, putative                               | nucleus / cytoplasm                        | No specific reference. // In vivo UV-cross-linking hybridization: a powerful technique for isolating RNA binding proteins. Application to trypanosome mini-exon derived RNA. Nucleic Acids Res. 1993 May 25;21(10):2453-8. Pellé R, Murphy NB.                                                                                                                                                                                                                                                                                                                                                                                                                                                                                                                                                                                                                                                                   |
| EAN86592.1                                          | nucleolar RNA-binding protein, putative (2)                 | nucleus                                    | N/A // A major tyrosine-phosphorylated protein of <i>Trypanosoma brucei</i> is a nucleolar RNA-binding protein. J Biol Chem. 1996 Jun 28;271(26):15675-81. Das A, Peterson GC, Kanner SB, Frevert U, Parsons M. // Developmental regulation of two nuclear RNA binding proteins, p34 and p37, from <i>Trypanosoma brucei</i> . Mol Biochem Parasitol. 1998 Apr 1;92(1):79-88. Zhang J, Ruvetchan W, Williams N.                                                                                                                                                                                                                                                                                                                                                                                                                                                                                                  |
| EAN90081.1                                          | ATP-dependent RNA helicase, putative                        | X                                          | N/A // Only 32 % homology to EAN92281.1 // <i>Trypanosoma brucei</i> mitochondria contain RNA helicase activity.Nucleic Acids Res. 1994 Oct 11;22(20):4050-6. Missel A, Göringer HU.                                                                                                                                                                                                                                                                                                                                                                                                                                                                                                                                                                                                                                                                                                                             |
| EAN98394.1                                          | p22 protein precursor, putative                             | mitochondrion                              | The trypanosome homolog of human p32 interacts with RBP16 and stimulates its gRNA binding activity. Nucleic Acids Res. 2001 Dec 15;29(24):5216-25. Hayman ML, Miller MM, Chandler DM, Goulah CC, Read LK. // UniProtKB/Swiss-Prot entry P61023 Calcium-binding protein p22                                                                                                                                                                                                                                                                                                                                                                                                                                                                                                                                                                                                                                       |

|                            |                                                                  |                      |                                                                                                                                                                                                                                                                                                                                                                                                                                                                                                                                                                                                                                                       |
|----------------------------|------------------------------------------------------------------|----------------------|-------------------------------------------------------------------------------------------------------------------------------------------------------------------------------------------------------------------------------------------------------------------------------------------------------------------------------------------------------------------------------------------------------------------------------------------------------------------------------------------------------------------------------------------------------------------------------------------------------------------------------------------------------|
| EAN91849.1                 | small nuclear ribonucleoprotein Sm-F, putative (1)               | nucleus              | The spliceosomal snRNP core complex of <i>Trypanosoma brucei</i> : cloning and functional analysis reveals seven Sm protein constituents. Proc Natl Acad Sci U S A. 2000 Aug 1;97(16):8967-72. Palfi Z, Lücke S, Lahm HW, Lane WS, Kruff V, Bragado-Nilsson E, Séraphin B, Bindereif A. // Sm core variation in spliceosomal small nuclear ribonucleoproteins from <i>Trypanosoma brucei</i> . EMBO J. 2006 Oct 4;25(19):4513-23. Wang P, Palfi Z, Preusser C, Lücke S, Lane WS, Kambach C, Bindereif A.                                                                                                                                              |
| EAN81851.1                 | nucleolar protein, putative                                      | nucleus              | N/A // Characterization and differential nuclear localization of Nopp140 and a novel Nopp140-like protein in trypanosomes. Eukaryot Cell. 2006 May;5(5):876-9. Kelly S, Singleton W, Wickstead B, Ersfeld K, Gull K.                                                                                                                                                                                                                                                                                                                                                                                                                                  |
| EAN85671.1                 | ribonucleoprotein p18, mitochondrial precursor, putative         | mitochondrion        | Characterization of two nuclear-encoded protein components of mitochondrial ribonucleoprotein complexes from <i>Leishmania tarentolae</i> . Mol Biochem Parasitol. 1995 Apr;71(1):65-79. Bringaud F, Peris M, Zen KH, Simpson L.                                                                                                                                                                                                                                                                                                                                                                                                                      |
| <b>PROTEIN SYNTHESIS</b>   |                                                                  |                      |                                                                                                                                                                                                                                                                                                                                                                                                                                                                                                                                                                                                                                                       |
| <b>TRANSLATION</b>         |                                                                  |                      | <b>44</b>                                                                                                                                                                                                                                                                                                                                                                                                                                                                                                                                                                                                                                             |
| EAN98366.1                 | 40S ribosomal protein S15a, putative                             | cytoplasm / rough ER | Molecular Biology of the Cell. Third edition. Alberts et al. // Isolation and characterization of polysomes from <i>Trypanosoma brucei</i> . Parasitology. 1980 Dec;81(Pt 3):537-51. Cordingley JS, Turner MJ. // Species specificity in ribosome biogenesis: a nonconserved phosphoprotein is required for formation of the large ribosomal subunit in <i>Trypanosoma brucei</i> . Eukaryot Cell. 2005 Jan;4(1):30-5. Jensen BC, Brekken DL, Randall AC, Kifer CT, Parsons M.                                                                                                                                                                        |
| EAN83566.1                 | 60S ribosomal protein I36, putative                              | "                    | N/A                                                                                                                                                                                                                                                                                                                                                                                                                                                                                                                                                                                                                                                   |
| EAN81492.1                 | 40S ribosomal protein S14, putative                              | "                    | N/A                                                                                                                                                                                                                                                                                                                                                                                                                                                                                                                                                                                                                                                   |
| EAN85291.1                 | ribosomal protein S26, putative                                  | "                    | N/A                                                                                                                                                                                                                                                                                                                                                                                                                                                                                                                                                                                                                                                   |
| EAN89722.1                 | 60S ribosomal protein L34, putative                              | "                    | N/A                                                                                                                                                                                                                                                                                                                                                                                                                                                                                                                                                                                                                                                   |
| EAN99789.1                 | 60S ribosomal protein L23, putative                              | "                    | N/A                                                                                                                                                                                                                                                                                                                                                                                                                                                                                                                                                                                                                                                   |
| EAN82862.1                 | ribosomal protein L24, putative                                  | "                    | Cloning and characterisation of cDNA encoding the <i>Trypanosoma brucei</i> ribosomal protein L24. Int J Parasitol. 1999 Apr;29(4):601-5. Read LK, Miltello KT, Nerantzakis GE.                                                                                                                                                                                                                                                                                                                                                                                                                                                                       |
| EAN89019.1                 | 40S ribosomal protein S16, putative                              | "                    | N/A                                                                                                                                                                                                                                                                                                                                                                                                                                                                                                                                                                                                                                                   |
| EAN84418.1                 | 60S ribosomal protein L13a, putative                             | "                    | N/A                                                                                                                                                                                                                                                                                                                                                                                                                                                                                                                                                                                                                                                   |
| EAN90899.1                 | ribosomal protein L21E (60S), putative                           | "                    | N/A                                                                                                                                                                                                                                                                                                                                                                                                                                                                                                                                                                                                                                                   |
| EAN83023.1                 | 60S ribosomal protein L17, putative                              | "                    | N/A                                                                                                                                                                                                                                                                                                                                                                                                                                                                                                                                                                                                                                                   |
| EAN92891.1                 | 40S ribosomal protein S17, putative                              | "                    | N/A                                                                                                                                                                                                                                                                                                                                                                                                                                                                                                                                                                                                                                                   |
| EAN88197.1                 | ribosomal protein S19, putative                                  | "                    | N/A                                                                                                                                                                                                                                                                                                                                                                                                                                                                                                                                                                                                                                                   |
| EAN81803.1                 | 60S ribosomal protein L11, putative                              | "                    | N/A                                                                                                                                                                                                                                                                                                                                                                                                                                                                                                                                                                                                                                                   |
| EAN89208.1                 | 60S ribosomal protein L35, putative                              | "                    | N/A                                                                                                                                                                                                                                                                                                                                                                                                                                                                                                                                                                                                                                                   |
| EAN99961.1                 | ribosomal protein L35A, putative                                 | "                    | N/A                                                                                                                                                                                                                                                                                                                                                                                                                                                                                                                                                                                                                                                   |
| EAN87953.1                 | ribosomal protein L27, putative                                  | "                    | Analysis of the 60 S ribosomal protein L27a (L29) gene of <i>Trypanosoma brucei</i> . Int J Parasitol. 1999 May;29(5):731-6. Brown SV, Williams N.                                                                                                                                                                                                                                                                                                                                                                                                                                                                                                    |
| EAN98360.1                 | 60S ribosomal protein L28, putative                              | "                    | N/A                                                                                                                                                                                                                                                                                                                                                                                                                                                                                                                                                                                                                                                   |
| EAN98186.1                 | 40S ribosomal protein S18, putative                              | "                    | The cloning and sequencing of ribosomal protein S18 of parasitic protozoa, <i>Entamoeba histolytica</i> . DNA Sea. 1998 Mar;8(4):267-70. Tanaka T, Tanaka M, Mitsui Y.                                                                                                                                                                                                                                                                                                                                                                                                                                                                                |
| EAN81251.1                 | 40S ribosomal protein S8, putative                               | "                    | N/A                                                                                                                                                                                                                                                                                                                                                                                                                                                                                                                                                                                                                                                   |
| EAN86269.1                 | 60S ribosomal protein L19, putative                              | "                    | N/A                                                                                                                                                                                                                                                                                                                                                                                                                                                                                                                                                                                                                                                   |
| EAO00224.1                 | 60S ribosomal protein L13, putative                              | "                    | N/A                                                                                                                                                                                                                                                                                                                                                                                                                                                                                                                                                                                                                                                   |
| EAN82879.1                 | 40S ribosomal protein S11, putative                              | "                    | N/A                                                                                                                                                                                                                                                                                                                                                                                                                                                                                                                                                                                                                                                   |
| EAN82694.1                 | 40S ribosomal protein S13, putative (1)                          | "                    | N/A                                                                                                                                                                                                                                                                                                                                                                                                                                                                                                                                                                                                                                                   |
| EAN82805.1                 | 40S ribosomal protein L14, putative                              | "                    | N/A                                                                                                                                                                                                                                                                                                                                                                                                                                                                                                                                                                                                                                                   |
| EAN87517.1                 | 40S ribosomal protein S9, putative                               | "                    | N/A                                                                                                                                                                                                                                                                                                                                                                                                                                                                                                                                                                                                                                                   |
| EAN97975.1                 | 60S ribosomal protein L18, putative                              | "                    | The cloning and sequencing of a ribosomal L18 protein from an evolutionary divergent eukaryote, <i>Trypanosoma brucei</i> . Biochim Biophys Acta. 1996 Nov 11;1309(1-2):69-72. Coulter LJ, Hide G.                                                                                                                                                                                                                                                                                                                                                                                                                                                    |
| EAN86177.1                 | 60S ribosomal subunit protein L31, putative                      | "                    | N/A                                                                                                                                                                                                                                                                                                                                                                                                                                                                                                                                                                                                                                                   |
| EAN83877.1                 | ribosomal protein S7, putative                                   | "                    | N/A                                                                                                                                                                                                                                                                                                                                                                                                                                                                                                                                                                                                                                                   |
| EAN93193.1                 | 60S ribosomal protein L18a, putative                             | "                    | N/A                                                                                                                                                                                                                                                                                                                                                                                                                                                                                                                                                                                                                                                   |
| EAN84470.1                 | 60S ribosomal protein L26, putative                              | "                    | N/A                                                                                                                                                                                                                                                                                                                                                                                                                                                                                                                                                                                                                                                   |
| EAN87845.1                 | 40S ribosomal protein S4, putative                               | "*                   | The deduced primary structure of a ribosomal protein S4 from <i>Trypanosoma cruzi</i> . Biochim Biophys Acta. 1998 Feb 11;1395(3):321-5. Hernández R, Palacios S, Herrera J, Martínez-Calvillo S, López I.                                                                                                                                                                                                                                                                                                                                                                                                                                            |
| EAN99433.1                 | 60S ribosomal protein L7a, putative                              | "                    | N/A                                                                                                                                                                                                                                                                                                                                                                                                                                                                                                                                                                                                                                                   |
| EAN95595.1                 | 40S ribosomal protein S6, putative                               | "                    | N/A                                                                                                                                                                                                                                                                                                                                                                                                                                                                                                                                                                                                                                                   |
| EAN87804.1                 | 60S ribosomal protein L2, putative                               | "                    | N/A                                                                                                                                                                                                                                                                                                                                                                                                                                                                                                                                                                                                                                                   |
| EAN94248.1                 | 60S ribosomal protein L7, putative                               | "                    | N/A                                                                                                                                                                                                                                                                                                                                                                                                                                                                                                                                                                                                                                                   |
| EAN83495.1                 | 40S ribosomal protein S3a, putative                              | "                    | N/A                                                                                                                                                                                                                                                                                                                                                                                                                                                                                                                                                                                                                                                   |
| EAN83816.1                 | 60S ribosomal protein L5, putative                               | "                    | N/A                                                                                                                                                                                                                                                                                                                                                                                                                                                                                                                                                                                                                                                   |
| EAN88665.1                 | 60S ribosomal protein L10, putative                              | "                    | N/A                                                                                                                                                                                                                                                                                                                                                                                                                                                                                                                                                                                                                                                   |
| EAN83925.1                 | 40S ribosomal protein S2, putative                               | "                    | N/A                                                                                                                                                                                                                                                                                                                                                                                                                                                                                                                                                                                                                                                   |
| EAN82415.1                 | 40S ribosomal protein SA, putative                               | "                    | N/A                                                                                                                                                                                                                                                                                                                                                                                                                                                                                                                                                                                                                                                   |
| EAN82665.1                 | 60S ribosomal protein L4, putative                               | "                    | N/A                                                                                                                                                                                                                                                                                                                                                                                                                                                                                                                                                                                                                                                   |
| EAN92822.1                 | ribosomal protein L3, putative                                   | "                    | N/A                                                                                                                                                                                                                                                                                                                                                                                                                                                                                                                                                                                                                                                   |
| EAN94487.1                 | 50S ribosomal protein L17, putative (1)                          | "                    | N/A                                                                                                                                                                                                                                                                                                                                                                                                                                                                                                                                                                                                                                                   |
| <b>TRANSLATION FACTORS</b> |                                                                  |                      | <b>14</b>                                                                                                                                                                                                                                                                                                                                                                                                                                                                                                                                                                                                                                             |
| EAN82857.1                 | elongation factor 1-alpha (EF-1-alpha), putative                 | cytoplasm, nucleus*  | <i>Trypanosoma cruzi</i> elongation factor 1-alpha: nuclear localization in parasites undergoing apoptosis. Gene. 1996 Sep 26;174(1):19-26. Billaut-Mulot O, Fernandez-Gomez R, Loyens M, Ouassii A.                                                                                                                                                                                                                                                                                                                                                                                                                                                  |
| EAN85113.1                 | elongation factor 1-gamma (EF-1-gamma), putative                 | cytoplasm            | Molecular and immunological characterization of a <i>Trypanosoma cruzi</i> protein homologous to mammalian elongation factor 1 gamma. Biol Cell. 1994;82(1):39-44. Billaut-Mulot O, Schöneck R, Fernandez-Gomez R, Taibi A, Capron A, Pommier V, Plumas-Marty B, Loyens M, Ouassii A. // Phenotype of recombinant <i>Trypanosoma cruzi</i> which overexpress elongation factor 1-gamma: possible involvement of EF-1-gamma GST-like domain in the resistance to clomipramine. Gene. 1997 Oct 1;198(1-2):259-67. Billaut-Mulot O, Fernandez-Gomez R, Ouassii A.                                                                                        |
| EAN87190.1                 | elongation factor 2, putative                                    | cytoplasm            | N/A. Part of the translation complex in eukaryotes // Phylogenetic position of kinetoplastid protozoa inferred from the protein phylogenies of elongation factors 1alpha and 2. J Biochem. 1996 Jan;119(1):70-9. Nakamura Y, Hashimoto T, Kamaishi T, Adachi J, Nakamura F, Okamoto K, Hasegawa M.                                                                                                                                                                                                                                                                                                                                                    |
| EAO00026.1                 | elongation factor TU, putative                                   | cytoplasm            | N/A // Identification of the elongation factor Tu binding site on 70S E. coli ribosomes by chemical crosslinking. Indian J Biochem Biophys. 1995 Dec;32(6):343-50. Nag B, Johnson AE, Traut RR.                                                                                                                                                                                                                                                                                                                                                                                                                                                       |
| EAO00256.1                 | elongation initiation factor 2 alpha subunit, putative           | cytoplasm            | N/A // Mechanism of polypeptide chain initiation in eukaryotes and its control by phosphorylation of the alpha subunit of initiation factor 2. Proc Natl Acad Sci U S A. 1982 Apr;79(8):2537-40. Siekierka J, Mauser L, Ochoa S.                                                                                                                                                                                                                                                                                                                                                                                                                      |
| EAN82455.1                 | 25 kDa translation elongation factor 1-beta                      | cytoplasm            | <i>Leishmania major</i> elongation factor 1B complex has trypanothione S-transferase and peroxidase activity. J Biol Chem. 2004 Nov 19;279(47):49003-9. Vickers TJ, Wyllie S, Fairlamb AH. // The cloning and characterization of <i>Tetrahymena pyriformis</i> translation elongation factor 1b alpha and gamma subunits. Cell Mol Biol Lett. 2005;10(4):689-96. Jousiune V, Sasnauskienė S, Juodka B. Difference at the N-terminal with previous one. // <i>Leishmania major</i> elongation factor 1B complex has trypanothione S-transferase and peroxidase activity. J Biol Chem. 2004 Nov 19;279(47):49003-9. Vickers TJ, Wyllie S, Fairlamb AH. |
| EAN96820.1                 | translation elongation factor 1-beta, putative                   | cytoplasm            | The two eIF4A helicases in <i>Trypanosoma brucei</i> are functionally distinct. Nucleic Acids Res. 2006 May 10;34(9):2495-507. Dhalia R, Marinsek N, Reis CR, Katz R, Muniz JR, Standart N, Carrington M, de Melo Neto OP.                                                                                                                                                                                                                                                                                                                                                                                                                            |
| EAN98272.1                 | eukaryotic initiation factor 4a, putative                        | cytoplasm            | Not found in trypanosomatids // Interactions of eukaryotic translation initiation factor 3 (eIF3) subunit NIP1/c with eIF1 and eIF5 promote preinitiation complex assembly and regulate start codon selection. Mol Cell Biol. 2004 Nov;24(21):9437-55. Valásek L, Nielsen KH, Zhang F, Fekete CA, Hinnebusch AG.                                                                                                                                                                                                                                                                                                                                      |
| EAN83191.1                 | eukaryotic translation initiation factor 5, putative (1)         | cytoplasm            | N/A // Interactions of eukaryotic translation initiation factor 3 (eIF3) subunit NIP1/c with eIF1 and eIF5 promote preinitiation complex assembly and regulate start codon selection. Mol Cell Biol. 2004 Nov;24(21):9437-55. Valásek L, Nielsen KH, Zhang F, Fekete CA, Hinnebusch AG.                                                                                                                                                                                                                                                                                                                                                               |
| EAN87305.1                 | eukaryotic translation initiation factor 3 subunit, putative (1) | cytoplasm            |                                                                                                                                                                                                                                                                                                                                                                                                                                                                                                                                                                                                                                                       |
| EAN88449.1                 | eukaryotic translation initiation factor, putative (1)           | cytoplasm            | N/A                                                                                                                                                                                                                                                                                                                                                                                                                                                                                                                                                                                                                                                   |



|                                                   |                                                                                      |                                                     |                                                                                                                                                                                                                                                                                                                                                                                                                                                                                                                                                                                                                                                                                                                                                                                                                                |
|---------------------------------------------------|--------------------------------------------------------------------------------------|-----------------------------------------------------|--------------------------------------------------------------------------------------------------------------------------------------------------------------------------------------------------------------------------------------------------------------------------------------------------------------------------------------------------------------------------------------------------------------------------------------------------------------------------------------------------------------------------------------------------------------------------------------------------------------------------------------------------------------------------------------------------------------------------------------------------------------------------------------------------------------------------------|
| EAN94343.1                                        | eukaryotic peptide chain release factor subunit 1, putative (1)                      | cytoplasm                                           | N/A. Recycling of eukaryotic posttermination ribosomal complexes. Cell. 2007 Oct 19;131(2):286-99. Pisarev AV, Hellen CU, Pestova TV.                                                                                                                                                                                                                                                                                                                                                                                                                                                                                                                                                                                                                                                                                          |
| EAN85172.1                                        | eukaryotic translation initiation factor 3 (eIF-3) interacting protein, putative (1) | cytoplasm                                           | Same as previous.<br>N/A. No similarity found to EAO00256.1 // Ribosomal localization of translation initiation factor IF2. RNA. 2003 Aug;9(8):958-69. Marzi S, Knight W, Brandi L, Caserta E, Soboleva N, Hill WE, Gualerzi CO, Lodmell JS.                                                                                                                                                                                                                                                                                                                                                                                                                                                                                                                                                                                   |
| EAN82311.1                                        | eukaryotic translation initiation factor 2 subunit, putative (2)                     | cytoplasm                                           |                                                                                                                                                                                                                                                                                                                                                                                                                                                                                                                                                                                                                                                                                                                                                                                                                                |
| <b>PROTEIN DESTINATION</b>                        |                                                                                      |                                                     |                                                                                                                                                                                                                                                                                                                                                                                                                                                                                                                                                                                                                                                                                                                                                                                                                                |
| <b>PROTEIN MODIFICATION</b>                       |                                                                                      |                                                     |                                                                                                                                                                                                                                                                                                                                                                                                                                                                                                                                                                                                                                                                                                                                                                                                                                |
| <b>2</b>                                          |                                                                                      |                                                     |                                                                                                                                                                                                                                                                                                                                                                                                                                                                                                                                                                                                                                                                                                                                                                                                                                |
| EAN85170.1                                        | dolichyl-phosphate beta-D-mannosyltransferase precursor, putative (2)                | ER                                                  | Possible localisation of dolichol-dependent mannosyltransferase of <i>Trypanosoma brucei</i> to the rough endoplasmic reticulum. Mol Biochem Parasitol. 1994 Feb;63(2):255-64. Prado-Figueroa M, Raper J, Oppendoerfer FR. // Cloning and functional expression of glycosyltransferases from parasitic protozoans by heterologous complementation in yeast: the dolichol phosphate mannose synthase from <i>Trypanosoma brucei brucei</i> . Biochem J. 1996 Jun 15;316 ( Pt 3):853-8. Mazhari-Tabrizi R, Eckert V, Blank M, Müller R, Mumberg D, Funk M, Schwarz RT.<br>The <i>Trypanosoma cruzi</i> PIN1 gene encodes a parvulin peptidyl-prolyl cis/trans isomerase able to replace the essential ESS1 in <i>Saccharomyces cerevisiae</i> . Mol Biochem Parasitol. 2007 Jun;153(2):186-93. Erben ED, Daum S, Tellez-Inon MT. |
| EAN85727.1                                        | peptidylprolyl isomerase-like, putative (2)                                          | X                                                   |                                                                                                                                                                                                                                                                                                                                                                                                                                                                                                                                                                                                                                                                                                                                                                                                                                |
| <b>PROTEIN FOLDING AND STABILIZATION</b>          |                                                                                      |                                                     |                                                                                                                                                                                                                                                                                                                                                                                                                                                                                                                                                                                                                                                                                                                                                                                                                                |
| <b>17</b>                                         |                                                                                      |                                                     |                                                                                                                                                                                                                                                                                                                                                                                                                                                                                                                                                                                                                                                                                                                                                                                                                                |
| EAO00223.1                                        | Heat shock protein 20, putative                                                      | Several compartments                                | N/A. Chloroplasts have a novel Cpn10 in addition to Cpn20 as co-chaperonins in <i>Arabidopsis thaliana</i> . J Biol Chem. 2001 Aug 10;276(32):29688-94. Khamouti Y, Shimada T, Kondo M, Hara-Nishimura I, Nishimura M.                                                                                                                                                                                                                                                                                                                                                                                                                                                                                                                                                                                                         |
| EAN83852.1                                        | heat shock 70 kDa protein, putative                                                  | cytoplasm                                           | Heat shock proteins in <i>Trypanosoma cruzi</i> : identification and localization of HSP70 and HSP60 proteins and structure of HSP60 genes (brief report). Biol Res. 1993;26(1-2):313-4. de Marval MG, Souto-Pradon T, Gottesdiener K, Silva R, van der Ploeg LH, Rondinelli E.                                                                                                                                                                                                                                                                                                                                                                                                                                                                                                                                                |
| EAN87418.1                                        | heat shock protein-like protein, putative (1)                                        | Several compartments                                | N/A                                                                                                                                                                                                                                                                                                                                                                                                                                                                                                                                                                                                                                                                                                                                                                                                                            |
| EAN82629.1                                        | heat shock protein 85, putative                                                      | Several compartments                                | Heat-shock disruption of <i>trans</i> -splicing in trypanosomes: effect on Hsp70, Hsp85 and tubulin mRNA synthesis. Gene. 1989 Oct 15;82(1):169-75. Muhich ML, Hsu MP, Boothroyd JC. Heat-shock Expression and localization of <i>Trypanosoma cruzi</i> hsp60. Mol Biochem Parasitol. 1994 Dec;68(2):197-208. Sullivan MA, Olson CL, Winquist AG, Engman DM.                                                                                                                                                                                                                                                                                                                                                                                                                                                                   |
| EAN84370.1                                        | heat shock 70 kDa protein, mitochondrial precursor, putative                         | kinetoplast                                         | N/A. Conservation of the regulatory subunit for the Clp ATP-dependent protease in prokaryotes and eukaryotes. Proc Natl Acad Sci U S A. 1990 May;87(9):3513-7. Gottesman S, Squires C, Pichersky E, Carrington M, Hobbs M, Mattick JS, Dalrymple B, Kuramitsu H, Shiroza T, Foster T, et al.                                                                                                                                                                                                                                                                                                                                                                                                                                                                                                                                   |
| EAN81877.1                                        | ATP-dependent Clp protease subunit, heat shock protein 100 (HSP100)                  | X                                                   | Stage-specific expression of the mitochondrial co-chaperonin of <i>Leishmania donovani</i> , CPN10. Kinetoplastid Biol Dis. 2005 Apr 29;4(1):3. Zamora-Veal FB, Kroemer M, Zander D, Clos J. Molecular cloning and characterization of the 78-kilodalton glucose-regulated protein of <i>Trypanosoma cruzi</i> . Infect Immun. 1994 Jun;62(6):2499-507. Tibbetts RS, Kim IY, Olson CL, Barthel LM, Sullivan MA, Winquist AG, Miller SD, Engman DM.                                                                                                                                                                                                                                                                                                                                                                             |
| EAN85850.1                                        | 10 kDa heat shock protein, putative                                                  | mitochondrion                                       | Expression and localization of <i>Trypanosoma cruzi</i> hsp60. Mol Biochem Parasitol. 1994 Dec;68(2):197-208. Sullivan MA, Olson CL, Winquist AG, Engman DM.                                                                                                                                                                                                                                                                                                                                                                                                                                                                                                                                                                                                                                                                   |
| EAN87966.1                                        | glucose-regulated protein 78, putative (BiP)                                         | ER                                                  | Stage-specific expression of the mitochondrial co-chaperonin of <i>Leishmania donovani</i> , CPN10. Kinetoplastid Biol Dis. 2005 Apr 29;4(1):3. Zamora-Veal FB, Kroemer M, Zander D, Clos J. Characterization of two protein disulfide isomerases from the cytoxic pathway of bloodstream forms of <i>Trypanosoma brucei</i> . J Biol Chem. 2005 Mar 18;280(11):10410-8. Rubotham J, Woods K, Garcia-Salcedo JA, Pays E, Nolan DP.                                                                                                                                                                                                                                                                                                                                                                                             |
| EAN97655.1                                        | chaperonin HSP60, mitochondrial precursor                                            | mitochondrion                                       | The DnaJ family of protein chaperones in <i>Trypanosoma cruzi</i> . Mol Biochem Parasitol. 1998 Mar 15;91(2):319-26. Tibbetts RS, Jensen JL, Olson CL, Wang FD, Engman DM.                                                                                                                                                                                                                                                                                                                                                                                                                                                                                                                                                                                                                                                     |
| EAN96800.1                                        | lipophosphoglycan biosynthetic protein, putative (HSP90)                             | cytoplasm/ ER                                       | The Interplay between folding facilitating mechanisms in <i>Trypanosoma cruzi</i> endoplasmic reticulum. Mol. Biol. Cell. 2003 September 14, 3529-40, 2003. Conte I, Labriola C, Cazzulo JJ, Docampo R, Parodi AJ.                                                                                                                                                                                                                                                                                                                                                                                                                                                                                                                                                                                                             |
| EAN91216.1                                        | protein disulfide isomerase, putative                                                | ER                                                  | Ablation of a small transmembrane protein of <i>Trypanosoma brucei</i> (TbVTC1) involved in the synthesis of polyphosphate alters acidocalcisome biogenesis and function, and leads to a cytokinesis defect. Biochem J. 2007 Oct 15;407(2):161-70. Fang J, Rohloff P, Miranda K, Docampo R.                                                                                                                                                                                                                                                                                                                                                                                                                                                                                                                                    |
| EAN97592.1                                        | chaperone DnaJ protein, putative (HSP 40) (1)                                        | mitochondrion                                       | N/A. General to HSP60 family.<br>N/A. GrpE N-terminal domain contributes to the interaction with DnaK and modulates the dynamics of the chaperone substrate binding domain. J Mol Biol. 2007 Dec 7;374(4):1054-64. Moro F, Taneva SG, Velázquez-Campov A, Muga A.                                                                                                                                                                                                                                                                                                                                                                                                                                                                                                                                                              |
| EAN82340.1                                        | calreticulin, putative                                                               | ER*                                                 | Stage-specific expression of the mitochondrial co-chaperonin of <i>Leishmania donovani</i> , CPN10. Kinetoplastid Biol Dis. 2005 Apr 29;4(1):3. Zamora-Veal FB, Kroemer M, Zander D, Clos J.                                                                                                                                                                                                                                                                                                                                                                                                                                                                                                                                                                                                                                   |
| EAN90740.1                                        | vacuolar transporter chaperone, putative (1)                                         | acidocalcisoma<br>mitochondrion/ other compartments |                                                                                                                                                                                                                                                                                                                                                                                                                                                                                                                                                                                                                                                                                                                                                                                                                                |
| EAN86005.1                                        | chaperonin alpha subunit, putative (HSP60 family)                                    |                                                     |                                                                                                                                                                                                                                                                                                                                                                                                                                                                                                                                                                                                                                                                                                                                                                                                                                |
| EAN81815.1                                        | co-chaperone GrpE, putative                                                          | mitochondrion                                       |                                                                                                                                                                                                                                                                                                                                                                                                                                                                                                                                                                                                                                                                                                                                                                                                                                |
| EAN89640.1                                        | Hsc70-interacting protein (Hip), putative                                            | cytoplasm/ nucleus                                  |                                                                                                                                                                                                                                                                                                                                                                                                                                                                                                                                                                                                                                                                                                                                                                                                                                |
| <b>PROTEOLYSIS</b>                                |                                                                                      |                                                     |                                                                                                                                                                                                                                                                                                                                                                                                                                                                                                                                                                                                                                                                                                                                                                                                                                |
| <b>12</b>                                         |                                                                                      |                                                     |                                                                                                                                                                                                                                                                                                                                                                                                                                                                                                                                                                                                                                                                                                                                                                                                                                |
| EAN82317.1                                        | gamma glutamyl carboxypeptidase, putative                                            | X                                                   | N/A. Gamma-glutamyl hydrolase conjugase. Purification and properties of the bovine hepatic enzyme. J Biol Chem. 1975 Aug 10;250(15):5982-94. Silink M, Reddel R, Bethel M, Rowe PB.                                                                                                                                                                                                                                                                                                                                                                                                                                                                                                                                                                                                                                            |
| EAN92417.1                                        | signal peptidase type I, putative (1)                                                | X                                                   | N/A. // The role of the membrane-spanning domain of type I signal peptidases in substrate cleavage site selection. J Biol Chem. 2000 Dec 8;275(49):38813-22. Carlos JL, Patezel M, Brubaker G, Karla A, Ashwell CM, Lively MO, Cao G, Bullinger P, Dalbey RE.                                                                                                                                                                                                                                                                                                                                                                                                                                                                                                                                                                  |
| EAN81757.1                                        | mitochondrial processing peptidase, beta subunit, putative                           | mitochondrion                                       | N/A. // Isolation, characterization, and expression of the gene encoding the beta subunit of the mitochondrial processing peptidase from <i>Blastocystis emersonii</i> . J Bacteriol. 1998 Aug;180(15):3967-72. Costa Rocha CR, Lopes Gomes S.                                                                                                                                                                                                                                                                                                                                                                                                                                                                                                                                                                                 |
| EAN97586.1                                        | mitochondrial processing peptidase alpha subunit, putative                           | mitochondrion                                       | N/A. Role of alpha-subunit of mitochondrial processing peptidase in substrate recognition. J Biol Chem. 1998 Sep 25;273(39):25158-63. Shimokata K, Kitada S, Ozishima T, Ito A.                                                                                                                                                                                                                                                                                                                                                                                                                                                                                                                                                                                                                                                |
| EAN87580.1                                        | cytosolic leucyl aminopeptidase, putative (1)                                        | cytoplasm                                           | N/A. // Biochemical characterization and structural prediction of a novel cytosolic leucyl aminopeptidase of the M17 family from <i>Schizosaccharomyces pombe</i> . FEBS J. 2007 Dec;274(23):6228-6240. Herrera-Camacho I, Rosas-Murrieta NH, Rojo-Domínguez A, Millán L, Reyes-Leiva J, Santos-López G, Suárez-Rendueles P.                                                                                                                                                                                                                                                                                                                                                                                                                                                                                                   |
| EAN83138.1                                        | calpain cysteine peptidase, putative                                                 | reservosome, PM*                                    | Subcellular localization of a cysteine proteinase from <i>Trypanosoma cruzi</i> . Mol Biochem Parasitol. 1989 Feb;33(1):43-7. Bontempi E, Martinez J, Cazzulo JJ. // Cysteine proteinase in <i>Trypanosoma cruzi</i> : immunocytochemical localization and involvement in parasite-host cell interaction. J Cell Sci. 1990 Jul;96 ( Pt 3):485-90. Souto-Pradon T, Campetella OE, Cazzulo JJ, de Souza W.                                                                                                                                                                                                                                                                                                                                                                                                                       |
| EAN97980.1                                        | mitochondrial intermediate peptidase, putative (1)                                   | mitochondrion                                       | N/A                                                                                                                                                                                                                                                                                                                                                                                                                                                                                                                                                                                                                                                                                                                                                                                                                            |
| EAN81557.1                                        | serine carboxypeptidase (CBP1), putative                                             | reservosome*                                        | Characterization of a lysosomal serine carboxypeptidase from <i>Trypanosoma cruzi</i> . Mol Biochem Parasitol. 2003 Sep;131(1):11-23. Parussini F, Garcia M, Mucci J, Aggiero F, Sánchez D, Hellman U, Aslund L, Cazzulo JJ.                                                                                                                                                                                                                                                                                                                                                                                                                                                                                                                                                                                                   |
| EAN90035.1                                        | proteasome regulatory non-ATPase subunit 5, putative (2)                             | cytoplasm                                           | Functional characterization of the 11 non-ATPase subunit proteins in the trypanosome 19 S proteasomal regulatory complex. J Biol Chem. 2002 Nov 8;277(45):42686-93. Li Z, Wang CC.                                                                                                                                                                                                                                                                                                                                                                                                                                                                                                                                                                                                                                             |
| EAN83379.1                                        | proteasome regulatory non-ATPase subunit, putative                                   | cytoplasm                                           | Same as previous.                                                                                                                                                                                                                                                                                                                                                                                                                                                                                                                                                                                                                                                                                                                                                                                                              |
| EAN88322.1                                        | hslvu complex proteolytic subunit-like, putative                                     | mitochondrion                                       | N/A. Eubacterial HslV and HslU subunits homologs in primordial eukaryotes. Mol Biol Evol. 2002 Dec;19(12):2110-7. Couvreur B, Wattiez R, Bollen A, Falmaene P, Le Ray D, Duardin JC.                                                                                                                                                                                                                                                                                                                                                                                                                                                                                                                                                                                                                                           |
| EAN97374.1                                        | CAAX prenyl protease 1, putative (1)                                                 | ER                                                  | C-terminal proteolysis of prenylated proteins in trypanosomatids and RNA interference of enzymes required for the post-translational processing pathway of farnesylated proteins. Mol Biochem Parasitol. 2007 Jun;153(2):115-24. Gillespie JR, Yokoyama K, Lu K, Eastman RT, Bollinger JG, Van Voorhis WC, Gelb MH, Buckner FS.                                                                                                                                                                                                                                                                                                                                                                                                                                                                                                |
| <b>TRANSPORT PROTEINS - INTRACELLULAR TRAFFIC</b> |                                                                                      |                                                     |                                                                                                                                                                                                                                                                                                                                                                                                                                                                                                                                                                                                                                                                                                                                                                                                                                |
| <b>24</b>                                         |                                                                                      |                                                     |                                                                                                                                                                                                                                                                                                                                                                                                                                                                                                                                                                                                                                                                                                                                                                                                                                |
| EAN95492.1                                        | vacuolar-type Ca2+-ATPase, putative (1)                                              | acidocalcisoma*                                     | Ca2+ content and expression of an acidocalcisomal calcium pump are elevated in intracellular forms of <i>Trypanosoma cruzi</i> . Mol Cell Biol. 1998 Apr;18(4):2309-23. Lu HG, Zhong L, de Souza W, Benchimol M, Moreno S, Docampo R.                                                                                                                                                                                                                                                                                                                                                                                                                                                                                                                                                                                          |
| EAN92377.1                                        | calcium-translocating P-type ATPase, putative (1)                                    | PM*                                                 | Characterization of the plasma-membrane calcium pump from <i>Trypanosoma cruzi</i> . Biochem J. 1995 Feb 15;306 ( Pt 1):299-303. Benaim G, Moreno SN, Hutchinson G, Cervino V, Hermoso T, Romero PJ, Ruiz F, de Souza W, Docampo R.                                                                                                                                                                                                                                                                                                                                                                                                                                                                                                                                                                                            |
| EAN81982.1                                        | plasma-membrane proton-efflux P-type ATPase, putative                                | PM*                                                 | <i>Trypanosoma cruzi</i> H+-ATPase 1 (TeHA1) and 2 (TeHA2) genes complement yeast mutants defective in H+ pumps and encode plasma membrane P-type H+-ATPases with different enzymatic properties. J Biol Chem. 2002 Nov 15;277(46):44497-506. Luo S, Scott DA, Docampo R.                                                                                                                                                                                                                                                                                                                                                                                                                                                                                                                                                      |
| EAN89594.1                                        | metal-ion transporter, putative (1)                                                  | acidocalcisoma*                                     | N/A. // Its localization to the acidocalcisome was studied in this work. See paper section 3.6.2                                                                                                                                                                                                                                                                                                                                                                                                                                                                                                                                                                                                                                                                                                                               |

|                            |                                                                             |                      |                                                                                                                                                                                                                                                                                                                                                                                                                                                                                                                         |
|----------------------------|-----------------------------------------------------------------------------|----------------------|-------------------------------------------------------------------------------------------------------------------------------------------------------------------------------------------------------------------------------------------------------------------------------------------------------------------------------------------------------------------------------------------------------------------------------------------------------------------------------------------------------------------------|
| EAN89428.1                 | mitochondrial carrier protein, putative (1)                                 | mitochondrion        | Characterization and developmentally regulated localization of the mitochondrial carrier protein homologue MCP6 from <i>Trypanosoma brucei</i> . Eukaryot Cell. 2006 Aug;5(8):1194-205. Colasante C, Alibu VP, Kirchberger S, Tjaden J, Clayton C, Voncken F.                                                                                                                                                                                                                                                           |
| EAN84262.1                 | tricarboxylate carrier, putative (1)                                        | mitochondrion        | N/A. Identification of the substrate binding sites within the yeast mitochondrial citrate transport protein. J Biol Chem. 2007 Jun 8;282(23):17210-20. Ma C, Remani S, Sun J, Kotaria R, Mayor JA, Walters DE, Kaplan RS.                                                                                                                                                                                                                                                                                               |
| EAN92689.1                 | mitochondrial phosphate transporter, putative                               | mitochondrion        | N/A                                                                                                                                                                                                                                                                                                                                                                                                                                                                                                                     |
| EAN86158.1                 | hexose transporter, putative                                                | PM*                  | Characterization of glucose transport and cloning of a hexose transporter gene in <i>Trypanosoma cruzi</i> . Proc Natl Acad Sci U S A. 1994 Aug 16;91(17):8278-82. Tetaud E, Bringaud F, Chabas S, Barrett MP, Baltz T. // Kinoplastid glucose transporters. Biochem J. 1997 Aug 1;325 ( Pt 3):569-80. Tetaud E, Barrett MP, Bringaud F, Baltz T.                                                                                                                                                                       |
| EAN90182.1                 | intraflagellar transport protein component, putative (1)                    | flagellum            | Intraflagellar transport and functional analysis of genes required for flagellum formation in trypanosomes. Mol Biol Cell. 2007 Dec 19 2007. Absalon S, Blisnick T, Kohl L, Toutirais G, Doré G, Julkowska D, Tavenet A, Bastin P.                                                                                                                                                                                                                                                                                      |
| EAN83814.1                 | COP-coated vesicle membrane protein p25L precursor, putative (1)            | cytoplasm            | The coatomer of <i>Trypanosoma brucei</i> . Mol Biochem Parasitol. 2001 Jun;115(1):55-61. Maier AG, Webb H, Ding M, Bremser M, Carrington M, Clayton C.                                                                                                                                                                                                                                                                                                                                                                 |
| EAN82747.1                 | Gim5A protein, putative                                                     | glycosome            | An essential dimeric membrane protein of trypanosome glycosomes. Mol Microbiol. 2001 Mar;39(6):1443-51. Maier A, Lorenz P, Voncken F, Clayton C.                                                                                                                                                                                                                                                                                                                                                                        |
| EAN90413.1                 | ADP/ATP carrier protein 1, mitochondrial precursor, putative                | mitochondrion        | Reactions involved in energy transfer in trypanosomes-I. Characterization of the mitochondrial adenine nucleotide translocator and the ATPase of <i>Crithidia luciliae</i> . Comp Biochem Physiol B. 1976;54(1):7-12. Opperdoes FR, Rijke DD, Borst P. // Characterization and developmentally regulated localization of the mitochondrial carrier protein homologue MCP6 from <i>Trypanosoma brucei</i> . Eukaryot Cell. 2006 Aug;5(8):1194-205. Colasante C, Alibu VP, Kirchberger S, Tjaden J, Clayton C, Voncken F. |
| EAN99009.1                 | peroxin-2, putative (1)                                                     | glycosome            | Functional identification of a <i>Leishmania</i> gene related to the peroxin 2 gene reveals common ancestry of glycosomes and peroxisomes. Mol Cell Biol. 1997 Mar;17(3):1093-101. Flaspohler JA, Rickoll WL, Beverley SM, Parsons M.                                                                                                                                                                                                                                                                                   |
| EAN81944.1                 | lysosomal/endosomal membrane protein p67, putative (1)                      | lysosome             | Molecular cloning of p67, a lysosomal membrane glycoprotein from <i>Trypanosoma brucei</i> . Mol Biochem Parasitol. 1999 Jan 5;98(1):17-28. Kelley RJ, Alexander DL, Cowan C, Balber AE, Bangs JD.                                                                                                                                                                                                                                                                                                                      |
| EAN97573.1                 | vacuolar protein sorting-associated protein 35, putative (2)                | cytoplasm            | <i>Trypanosoma brucei</i> vacuolar protein sorting 41 (VPS41) is required for intracellular iron utilization and maintenance of normal cellular morphology. Parasitology. 2007 Oct;134(Pt 11):1639-47. Lu S, Suzuki T, Iizuka N, Ohshima S, Yabu Y, Suzuki M, Wen L, Ohta N.                                                                                                                                                                                                                                            |
| EAN98377.1                 | importin alpha, putative (2)                                                | nucleus              | Novel and essential subunits in the 300-kilodalton nuclear cap binding complex of <i>Trypanosoma brucei</i> . Mol Cell Biol. 2005 Mar;25(6):2216-26. Li H, Tschudi C.                                                                                                                                                                                                                                                                                                                                                   |
| EAN85542.1                 | COP-coated vesicle membrane protein p24 precursor, putative                 | cytoplasm            | The coatomer of <i>Trypanosoma brucei</i> . Mol Biochem Parasitol. 2001 Jun;115(1):55-61. Maier AG, Webb H, Ding M, Bremser M, Carrington M, Clayton C.                                                                                                                                                                                                                                                                                                                                                                 |
| EAN96914.1                 | mitochondrial import inner membrane translocase subunit Tim17, putative (1) | mitochondrion        | The direct route: a simplified pathway for protein import into the mitochondrion of trypanosomes. Trends Cell Biol. 2008 Jan;18(1):12-8. Schneider A, Bursac D, Lithgow T.                                                                                                                                                                                                                                                                                                                                              |
| EAN87271.1                 | glycosomal membrane protein, putative                                       | glycosome            | Identification of two integral glycosomal membrane proteins in <i>Trypanosoma brucei</i> . Mol Biochem Parasitol. 1987 Aug;25(1):83-92. Aman RA, Wang CC.                                                                                                                                                                                                                                                                                                                                                               |
| EAN98357.1                 | pretranslocation protein, alpha subunit, putative (1)                       | cytoplasm/ ER        | N/A. Kinetic determination of the effects of ADP-ribosylation on the interaction of eukaryotic elongation factor 2 with ribosomes. J Biol Chem. 1990 Apr 15;265(11):6030-4. Nygård O, Nilsson L.                                                                                                                                                                                                                                                                                                                        |
| EAN92899.1                 | coatmer gamma subunit, putative (1)                                         | cytoplasm            | Binding of coatmer by the PEX11 C-terminus is not required for function. FEBS Lett. 2000 Nov 3;484(2):82-6. Maier AG, Schulreich S, Bremser M, Clayton C.                                                                                                                                                                                                                                                                                                                                                               |
| EAN82577.1                 | ADP-ribosylation factor 1, putative (1)                                     | cytoplasm            | TeArf1: a <i>Trypanosoma cruzi</i> ADP-ribosylation factor. Parasitol Res. 2003 Sep;91(2):166-70. de Sá-Freire A, Nepomuceno-Silva JL, da Paixão JC, de Mendonça SM, de Melo LD, Lopes UG.                                                                                                                                                                                                                                                                                                                              |
| EAN81438.1                 | ADP-ribosylation factor, putative (ER to Golgi)                             | cytoplasm            | same as previous.                                                                                                                                                                                                                                                                                                                                                                                                                                                                                                       |
| EAN99332.1                 | RAB GDP dissociation inhibitor alpha, putative (2)                          | cytoplasm            | A bioinformatic analysis of the RAB genes of <i>Trypanosoma brucei</i> . Mol Biochem Parasitol. 2005 May;141(1):89-97. Ackers JP, Dhir V, Field MC.                                                                                                                                                                                                                                                                                                                                                                     |
| <b>SIGNAL TRANSDUCTION</b> |                                                                             |                      | <b>11</b>                                                                                                                                                                                                                                                                                                                                                                                                                                                                                                               |
| EAN82497.1                 | casein kinase, putative (2)                                                 | Several compartments | Two casein kinase 1 isoforms are differentially expressed in <i>Trypanosoma cruzi</i> . Mol Biochem Parasitol. 2002 Sep-Oct;124(1-2):23-36. Spadafora C, Repetto Y, Torres C, Pino L, Robello C, Morello A, Gamarro F, Castanys S. // Protein kinase CK1 from <i>Trypanosoma cruzi</i> . J Protein Chem. 2003 Aug;22(6):591-9. Calabokis M, Kurz L, Gonzatti MI, Bubis J.                                                                                                                                               |
| EAN83372.1                 | casein kinase II, alpha chain, putative (1)                                 | nucleus              | Molecular cloning of <i>Trypanosoma brucei</i> CK2 catalytic subunits: the alpha isoform is nuclear and phosphorylates the nucleolar protein Nopp44/46. Mol Biochem Parasitol. 2002 Jan;119(1):97-106. Park JH, Brekken DL, Randall AC, Parsons M.                                                                                                                                                                                                                                                                      |
| EAN90694.1                 | serine/threonine protein kinase, putative (1)                               | Several compartments | Cell cycle-specific induction of an 89 kDa serine/threonine protein kinase activity in <i>Trypanosoma brucei</i> . J Cell Sci. 1994 Jul;107 ( Pt 7):1825-32. Gale M Jr, Carter V, Parsons M.                                                                                                                                                                                                                                                                                                                            |
| EAN95882.1                 | activated protein kinase C receptor, putative                               | cytoplasm            | The RACK1 homologue from <i>Trypanosoma brucei</i> is required for the onset and progression of cytokinesis. J Biol Chem. 2006 Apr 7;281(14):9781-90. Rothberg KG, Burdette DL, Pfannstiel J, Jetton N, Singh R, Ruben L.                                                                                                                                                                                                                                                                                               |
| EAN84558.1                 | arginine kinase, putative                                                   | X                    | <i>Trypanosoma cruzi</i> arginine kinase characterization and cloning. A novel energetic pathway in protozoan parasites. J Biol Chem. 2000 Jan 14;275(2):1495-501. Pereira CA, Alonso GD, Paveto MC, Iribarren A, Cabanas ML, Torres HN, Flawiá MM.                                                                                                                                                                                                                                                                     |
| EAN88244.1                 | phosphoinositide-binding protein, putative (1)                              | X                    | N/A. Phosphoinositides: regulators of membrane traffic and protein function. FEBS Lett. 2007 May 22;581(11):2105-11. Krauss M, Hauke V.                                                                                                                                                                                                                                                                                                                                                                                 |
| EAN87527.1                 | protein phosphatase 2A catalytic subunit, putative (1)                      | Several compartments | A novel protein phosphatase 2A (PP2A) is involved in the transformation of human protozoan parasite <i>Trypanosoma cruzi</i> . Biochem J. 2003 Sep 15;374(Pt 3):647-56. González J, Cornejo A, Santos MR, Cordero EM, Gutiérrez B, Porcile P, Mortara RA, Sagua H, Da Silveira JF, Arava JE.                                                                                                                                                                                                                            |
| EAN83392.1                 | calmodulin                                                                  | CV*                  | Linkage of the calmodulin and ubiquitin loci in <i>Trypanosoma cruzi</i> . Nucleic Acids Res. 1990 Aug 11;18(15):4561-9. Chung SH, Swindle J.                                                                                                                                                                                                                                                                                                                                                                           |
| EAN84508.1                 | IgE-dependent histamine-releasing factor, putative                          | cytoplasm            | N/A. Histamine-releasing factors, a heterogeneous group of different activities. Clin Exp Allergy. 2003 Sep;33(9):1175-82. Budde IK, Aalberse RC.                                                                                                                                                                                                                                                                                                                                                                       |
| EAN86963.1                 | calcium-binding protein, putative (1)                                       | flagellum*           | A novel flagellar Ca <sup>2+</sup> -binding protein in trypanosomes. J Biol Chem. 1989 Nov 5;264(31):18627-31. Engman DM, Krause KH, Blumin JH, Kim KS, Kirchhoff LV, Donelson JE. // A flagellum-specific calcium sensor. J Biol Chem. 2005 Dec 2;280(48):40104-11. Buchanan KT, Ames JB, Asfaw SH, Wingard JN, Olson CL, Campana PT, Araújo AP, Engman DM.                                                                                                                                                            |
| EAN91644.1                 | GTP-binding protein, putative                                               | X                    | Signalling the genome: the Ras-like small GTPase family of trypanosomatids. Trends Parasitol. 2005 Oct;21(10):447-50. Field MC.                                                                                                                                                                                                                                                                                                                                                                                         |
| <b>OTHERS</b>              |                                                                             |                      | <b>5</b>                                                                                                                                                                                                                                                                                                                                                                                                                                                                                                                |
| EAN87391.1                 | acid phosphatase, putative (1)                                              | X                    | Localisation of acid phosphatase activity on the surface of bloodstream forms of <i>Trypanosoma congolense</i> . Exp Parasitol. 1996 Dec;84(3):429-38. Tosomba OM, Coetzer TH, Lonsdale-Eccles JD. // Cytochemical localization of acid phosphatase in <i>Leishmania mexicana amazonensis</i> . J Submicrosc Cytol. 1986 Jan;18(1):127-32. Pimenta PF, De Souza W.                                                                                                                                                      |
| EAN93852.1                 | reticulon domain protein, putative (2)                                      | ER                   | N/A. Nogo and its parTNers. Trends Cell Biol. 2003 Apr;13(4):187-94. Oertle T, Schwab ME.                                                                                                                                                                                                                                                                                                                                                                                                                               |
| EAN81497.1                 | retrotransposon hot spot (RHS) protein, putative                            | nucleus              | A new, expressed multigene family containing a hot spot for insertion of retroelements is associated with polymorphic subtelomeric regions of <i>Trypanosoma brucei</i> . Eukaryot Cell. 2002 Feb;1(1):137-51. Erratum in: Eukaryot Cell 2002 Apr;1(2):305. Bringaud F, Biteau N, Melville SE, Hez S, El-Sayed NM, Leech V, Berriman M, Hall N, Donelson JE, Baltz T.                                                                                                                                                   |
| EAN81577.1                 | trichohyalin, putative (1)                                                  | X                    | N/A. Trichohyalin mechanically strengthens the hair follicle: multiple cross-bridging roles in the inner root sheath. J Biol Chem. 2003 Oct 17;278(42):41409-19. Steintner PM, Parry DA, Marekova LN.                                                                                                                                                                                                                                                                                                                   |
| EAN92997.1                 | carbonic anhydrase-like protein, putative (1)                               | X                    | N/A. Acidocalcisomes are functionally linked to the contractile vacuole of <i>Dictyostelium discoideum</i> . J Biol Chem. 2002 Mar 8;277(10):8146-53. Marchesini N, Ruiz FA, Vieira M, Docampo R.                                                                                                                                                                                                                                                                                                                       |

Abbreviations used: PM: plasma membrane, ER, endoplasmic reticulum, CV, contractile vacuole

**TABLE S8 A: SIGNAL PEPT. & TM:**

| PROTEIN ID | Gene Copy # | PolyPhobius  | HMMTOP | TMHMM     | SignalP  | Final Prediction |
|------------|-------------|--------------|--------|-----------|----------|------------------|
|            |             | TM - SP      | TM     | TM        | SP       | SP - TM          |
| EAN90233.1 | 1           | 1 - 0        | 1      | 1         | N        | N - 1            |
| EAN92211.1 | 2           | 6 - 0        | 4      | 0         | N        | N - 4/6          |
| EAN85296.1 | 1           | 0 - 0        | 0      | 0         | N        | N - 0            |
| EAN94958.1 | 2           | 0 - 0        | 1      | 0         | N        | N - 0            |
| EAN99605.1 | 1           | 0 - 0        | 0      | 0         | N        | N - 0            |
| EAN87059.1 | 2           | <b>0 - Y</b> | 0      | 0         | N-Y      | <b>Y*</b> - 0    |
| EAN89163.1 | 1           | 0 - 0        | 0      | 0         | N        | N - 0            |
| EAN82199.1 | 1           | <b>1 - Y</b> | 2      | 2         | <b>Y</b> | <b>Y</b> - 1     |
| EAN99158.1 | 1           | 0 - 0        | 0      | 0         | N        | N - 0            |
| EAN87824.1 | 2           | 0 - 0        | 0      | 0         | N        | N - 0            |
| EAN83270.1 | 3           | <b>1 - Y</b> | 2      | 2         | <b>Y</b> | <b>Y</b> - 1     |
| EAN82898.1 | 9           | 4 - 0        | 3      | 1         | N        | N - 3/4          |
| EAN86445.1 | 2           | 0 - 0        | 0      | 0         | N        | N - 0            |
| EAN87937.1 | 1           | 2 - 0        | 2      | 2         | N        | N - 2            |
| EAN89424.1 | 2           | <b>1 - Y</b> | 1      | 1         | N        | N - 1            |
| EAN84629.1 | 2           | 0 - 0        | 0      | 0         | N        | N - 0            |
| EAN90235.1 | 1           | 0 - 0        | 0      | 0         | N        | N - 0            |
| EAN91922.1 | 3           | 4 - 0        | 4      | 3 (but 4) | N        | N - 4            |
| EAN97577.1 | 2           | 0 - 0        | 1      | 0         | N        | N - 0            |
| EAN82173.1 | 10          | 0 - 0        | 0      | 0         | N        | N - 0            |
| EAN85405.1 | 1           | 0 - 0        | 0      | 0         | N        | N - 0            |
| EAN90473.1 | 1           | 0 - 0        | 0      | 0         | N        | N - 0            |
| EAN83261.1 | 13          | 0 - 0        | 0      | 0         | N        | N - 0            |
| EAN81197.1 | 13          | 0 - 0        | 0      | 0         | N        | N - 0            |
| EAN95832.1 | 13          | 0 - 0        | 0      | 0         | N        | N - 0            |
| EAN81873.1 | 1           | 0 - 0        | 0      | 0         | N        | N - 0            |
| EAN95952.1 | 2           | 0 - 0        | 0      | 0         | N        | N - 0            |
| EAN84522.1 | 2           | 0 - 0        | 0      | 0         | N        | N - 0            |
| EAN99627.1 | 2           | 0 - 0        | 0      | 0         | N        | N - 0            |
| EAN87577.1 | 2           | 0 - 0        | 0      | 0         | N        | N - 0            |
| EAN82896.1 | 3           | <b>0 - Y</b> | 1      | 0         | Y-N      | <b>Y*</b> - 0    |
| EAN99701.1 | 1           | 0 - 0        | 0      | 0         | N        | N - 0            |
| EAN99763.1 | 1           | 0 - 0        | 0      | 0         | N        | N - 0            |
| EAN94545.1 | 3           | 0 - 0        | 0      | 0         | N        | N - 0            |
| EAN91782.1 | 2           | 1 - 0        | 2      | 1         | <b>Y</b> | <b>Y</b> - 1     |
| EAN87428.1 | 3           | 1 - 0        | 1      | 1         | Y-N      | N - 1            |
| EAN85276.1 | 2           | 0 - 0        | 0      | 0         | N        | N - 0            |
| EAN87301.1 | 2           | 2 - 0        | 3      | 2         | N        | N - 2            |
| EAN93401.1 | 2           | 3 - 0        | 3      | 1 (but3)  | Y-N      | N - 3            |
| EAN85190.1 | 1           | 0 - 0        | 0      | 0         | N        | N - 0            |
| EAN87214.1 | 5           | <b>0 - Y</b> | 0      | 0         | <b>Y</b> | <b>Y</b> - 0     |
| EAN88258.1 | 2           | 0 - 0        | 0      | 0         | N        | N - 0            |
| EAN98396.1 | 2           | 0 - 0        | 1      | 0         | N        | N - 0            |
| EAN85108.1 | 2           | 0 - 0        | 1      | 0 (but 1) | N-Y      | N - 1            |
| EAN94586.1 | 2           | 0 - 0        | 1      | 0         | N        | N - 0            |
| EAN87063.1 | 2           | 0 - 0        | 0      | 0         | N        | N - 0            |
| EAN82309.1 | 1           | 1 - 0        | 2      | 1         | N        | N - 1            |
| EAN97099.1 | 2           | 1 - 0        | 1      | 1         | N-Y      | N - 1            |
| EAN85329.1 | 2           | 3 - 0        | 4      | 3         | N-Y      | N - 3            |

| PROTEIN ID | Gene Copy # | PolyPhobius  | HMMTOP | TMHMM       | SignalP  | Final Prediction |
|------------|-------------|--------------|--------|-------------|----------|------------------|
|            |             | TM - SP      | TM     | TM          | SP       | SP - TM          |
| EAN88802.1 | 2           | 0 - 0        | 0      | 0           | N        | N - 0            |
| EAN94012.1 | 1           | 0 - 0        | 0      | 0           | N        | N - 0            |
| EAN99952.1 | 2           | 0 - 0        | 0      | 0           | N        | N - 0            |
| EAN97551.1 | 2           | 0 - 0        | 0      | 0           | N        | N - 0            |
| EAN92109.1 | 2           | 0 - 0        | 1      | 0           | N        | N - 0            |
| EAN84988.1 | 4           | 1 - 0        | 0      | 0           | N        | N - 0            |
| EAN97019.1 | 2           | 0 - 0        | 1      | 0           | N        | N - 0            |
| EAN86484.1 | 3           | <b>3 - Y</b> | 3      | 4           | <b>Y</b> | <b>Y - 3</b>     |
| EAN91740.1 | 1           | 0 - 0        | 0      | 0           | N        | N - 0            |
| EAN84095.1 | 9           | 1 - 0        | 1      | 1           | <b>Y</b> | <b>Y - 0</b>     |
| EAN95493.1 | 2           | 0 - 0        | 0      | 0           | N        | N - 0            |
| EAN89677.1 | 12          | 0 - 0        | 0      | 0           | N        | N - 0            |
| EAN98716.1 | 3           | 0 - 0        | 0      | 0           | N        | N - 0            |
| EAN97971.1 | 2           | 0 - 0        | 0      | 0           | N        | N - 0            |
| EAN81827.1 | 2           | 1 - 0        | 1      | 0 (but 1)   | N        | N - 1            |
| EAN83529.1 | 2           | 0 - 0        | 0      | 0           | N        | N - 0            |
| EAN87488.1 | 2           | 3 - 0        | 3      | 2           | N        | N - 3            |
| EAN88283.1 | 3           | 3 - 0        | 2      | 0 (but 1)   | <b>Y</b> | <b>Y - 1</b>     |
| EAN84096.1 | 7           | 2 - 0        | 2      | 2           | Y-N      | N - 2            |
| EAN88063.1 | 2           | 0 - 0        | 0      | 0           | N        | N - 0            |
| EAN86150.1 | 3           | 1 - 0        | 0      | 1           | N        | N - 1            |
| EAN88162.1 | 3           | 0 - 0        | 0      | 0           | N        | N - 0            |
| EAN88387.1 | 2           | 0 - 0        | 0      | 0           | N        | N - 0            |
| EAN89593.1 | 12          | 0 - 0        | 0      | 0           | N        | N - 0            |
| EAN83022.1 | 5           | 1 - 0        | 0      | 0           | N        | N - 0            |
| EAN91430.1 | 3           | 0 - 0        | 0      | 0           | N        | N - 0            |
| EAN99391.1 | 2           | 2 - 0        | 1      | 1           | N-Y      | N - 1            |
| EAN95438.1 | 1           | 2 - 0        | 3      | 0 (but 1/2) | N        | N - 2            |
| EAN97520.1 | 2           | 0 - 0        | 1      | 0           | N        | N - 0            |
| EAN85286.1 | 2           | <b>0 - Y</b> | 2      | 0           | N        | <b>N/Y - 0/1</b> |
| EAN95451.1 | 2           | 0 - 0        | 0      | 0           | N        | N - 0            |
| EAN81839.1 | 23          | 0 - 0        | 0      | 0           | N        | N - 0            |
| EAO00208.1 | 1           | 0 - 0        | 0      | 0           | N        | N - 0            |
| EAN99098.1 | 2           | 0 - 0        | 0      | 0           | N        | N - 0            |
| EAO00215.1 | 2           | 0 - 0        | 1      | 0           | N        | N - 0            |
| EAN81429.1 | 29          | 14 - 0       | 14     | 14          | N        | N - 14           |
| EAN93181.1 | 2           | <b>2 - Y</b> | 2      | 2           | <b>Y</b> | <b>Y - 2</b>     |
| EAN91858.1 | 2           | 0 - 0        | 1      | 0           | N        | N - 0            |
| EAN86224.1 | 2           | 2 - 0        | 2      | 2           | <b>Y</b> | N - 2            |
| EAN85839.1 | 3           | 0 - 0        | 0      | 0           | N        | N - 0            |
| EAN86428.1 | 5           | <b>0 - Y</b> | 2      | 1           | Y-N      | <b>Y - 1</b>     |
| EAN92675.1 | 2           | 0 - 0        | 0      | 0           | N        | N - 0            |
| EAN88187.1 | 2           | 0 - 0        | 0      | 0           | N        | N - 0            |
| EAN96768.1 | 1           | <b>0 - Y</b> | 1      | 1           | Y-N      | <b>Y - 0</b>     |
| EAN94594.1 | 3           | 0 - 0        | 0      | 0           | N        | N - 0            |
| EAN94854.1 | 2           | 0 - 0        | 0      | 0           | N        | N - 0            |
| EAN96277.1 | 2           | 1 - 0        | 3      | 1           | N        | N - 1            |
| EAN84157.1 | 3           | 0 - 0        | 0      | 0           | N        | N - 0            |
| EAN90288.1 | 3           | 1 - 0        | 1      | 0 (but 1)   | <b>Y</b> | N - 1            |
| EAN85669.1 | 3           | 0 - 0        | 0      | 0           | N        | N - 0            |

| PROTEIN ID | Gene Copy # | PolyPhobius | HMMTOP | TMHMM     | SignalP | Final Prediction |
|------------|-------------|-------------|--------|-----------|---------|------------------|
|            |             | TM - SP     | TM     | TM        | SP      | SP - TM          |
| EAN95652.1 | 2           | 0 - 0       | 1      | 0         | N       | N - 0            |
| EAN83893.1 | 2           | 0 - 0       | 1      | 0         | Y*      | N - 0            |
| EAN89707.1 | 6           | 0 - 0       | 0      | 0         | N       | N - 0            |
| EAN94699.1 | 2           | 0 - 0       | 0      | 0         | N       | N - 0            |
| EAN91538.1 | 1           | 0 - 0       | 0      | 0         | N       | N - 0            |
| EAN82045.1 | 3           | 0 - 0       | 1      | 0         | N       | N - 0            |
| EAN90017.1 | 2           | 2 - Y       | 5      | 0         | N*      | Y - 2/5          |
| EAN83327.1 | 2           | 1 - Y       | 2      | 2         | Y       | Y - 2            |
| EAN88441.1 | 3           | 0 - 0       | 0      | 0         | N       | N - 0            |
| EAN83132.1 | 2           | 0 - Y       | 1      | 0         | Y       | Y - 0            |
| EAN83371.1 | 1           | 2 - 0       | 1      | 1         | N-Y     | N - 1            |
| EAN91467.1 | 2           | 0 - Y       | 1      | 0         | Y       | Y - 0            |
| EAN95114.1 | 2           | 0 - 0       | 0      | 0         | N       | N - 0            |
| EAN94516.1 | x           | 0 - Y       | 0      | 0         | N       | N - 0            |
| EAN82097.1 | 1           | 0 - 0       | 0      | 0         | N       | N - 0            |
| EAN97997.1 | 1           | 0 - 0       | 0      | 0         | N       | N - 0            |
| EAN93009.1 | 1           | 0 - Y       | 0      | 0         | N       | N - 0            |
| EAN89189.1 | 1           | 0 - 0       | 0      | 0         | N       | N - 0            |
| EAN90963.1 | 2           | 1 - Y       | 2      | 1 (but 2) | Y       | Y - 1            |
| EAN98338.1 | 3           | 0 - 0       | 1      | 0         | N       | N - 0            |
| EAN82295.1 | 1           | 0 - 0       | 0      | 0         | N       | N - 0            |
| EAN80998.1 | 2           | 0 - 0       | 0      | 0         | N       | N - 0            |
| EAN81715.1 | 3           | 0 - 0       | 0      | 0         | Y       | N - 0            |
| EAN99859.1 | 36          | 0 - Y       | 0      | 0         | Y       | Y - 0            |
| EAN95112.1 | 3           | 0 - 0       | 0      | 0         | N       | N - 0            |
| EAN85221.1 | 3           | 0 - 0       | 0      | 0         | N       | N - 0            |
| EAN83235.1 | 2           | 0 - 0       | 0      | 0         | N       | N - 0            |
| EAN94132.1 | 2           | 0 - Y       | 0      | 0         | Y       | Y - 0            |
| EAN88008.1 | 2           | 0 - 0       | 0      | 0         | N       | N - 0            |
| EAN83367.1 | 3           | 0 - 0       | 1      | 0         | N       | N - 0            |
| EAN89431.1 | 2           | 0 - 0       | 0      | 0         | N       | N - 0            |
| EAN89518.1 | 3           | 0 - 0       | 0      | 0         | N       | N - 0            |
| EAN84397.1 | 3           | 0 - 0       | 2      | 0         | N       | N - 0            |
| EAN81302.1 | 1           | 0 - 0       | 0      | 0         | N       | N - 0            |
| EAN84897.1 | 4           | 1 - 0       | 1      | 1         | Y-N     | N - 1            |
| EAN85214.1 | 2           | 0 - Y       | 0      | 0         | Y       | Y - 0            |
| EAN95668.1 | 1           | 0 - 0       | 0      | 0         | N       | N - 0            |
| EAN87575.1 | 3           | 1 - 0       | 1      | 1         | Y-N     | N - 1            |
| EAN94531.1 | 3           | 0 - 0       | 1      | 0         | N       | N - 0            |

| Summary | SP - TM     | Total | % of total |
|---------|-------------|-------|------------|
|         | N - 0       | 91    | 66%        |
|         | N - 1       | 14    | 10%        |
|         | N - >1      | 12    | 8.60%      |
|         | Y - 0       | 10    | 7.20%      |
|         | Y - =/>1    | 10    | 7.20%      |
|         | Not Defined | 1     | 0.72%      |

**Note:** N: no signal peptide, non-secretory protein; Y: signal peptide, secreted protein; Y-N: signal anchor (looks like a signal peptide but the cleavage probability is not significant enough). For THMMH those cases were we indicate a '(but #)' refers to the possibility of an extra transmembrane as by indicated in the graphic output from the server (not shown here).

**TABLE S8 B: TARGET SIGNAL & LOCALIZATION PREDICTIONS**

The TABLA S8B shows the results form six target signal prediction servers. The final prediction is the putative location of the hypothetical protein, considering at least two or more servers agreed in the same prediction. When no agreement was observed, no location is inferred.

**Abbreviations:** M or m: mitochondrion; N: nucleus; PM: plasma membrane; C or cytop: cytoplasm; ER: endoplasmic reticulum; G: golgi; EXTR: extracellular-secreted; CYTOSK: cytoskeleton; Glyc: glycosome-peroxisome; SEC or s: secretory pathway.

| <b>PROTEIN ID</b> | <b>PENCE<br/>Location</b> | <b>pTARGET<br/>Location</b> | <b>PeroxiP<br/>PTS1</b> | <b>SPL-Loc<br/>Location</b> | <b>WOLF pSORT<br/>Location</b> | <b>TargetP<br/>Location</b> | <b>FINAL<br/>PREDICTION</b> |
|-------------------|---------------------------|-----------------------------|-------------------------|-----------------------------|--------------------------------|-----------------------------|-----------------------------|
| EAN90233.1        | -                         | mitochondrion               |                         | mitochondria                | M                              | m                           | <b>M</b>                    |
| EAN92211.1        | -                         | nucleus                     |                         | nucleus_or_cytosol          | PM / ER                        | -                           |                             |
| EAN85296.1        | -                         | nucleus                     | x                       | nucleus_or_cytosol          | N                              | -                           | <b>N</b>                    |
| EAN94958.1        | -                         | mitochondrion               |                         | mitochondria                | M                              | m                           | <b>M</b>                    |
| EAN99605.1        | cytoplasm                 | nucleus                     |                         | nucleus_or_cytosol          | N / M / C                      | -                           | <b>N-C</b>                  |
| EAN87059.1        | nucleus                   | nucleus                     |                         | mitochondria                | N / M                          | m                           | <b>N-M</b>                  |
| EAN89163.1        | cytop/nucleus             | nucleus                     |                         | nucleus_or_cytosol          | N                              | m                           | <b>N</b>                    |
| EAN82199.1        | -                         | ER                          |                         | secretory_pathway           | EXTR / ER                      | s                           | <b>SEC-ER</b>               |
| EAN99158.1        | nucleus                   | nucleus                     |                         | nucleus_or_cytosol          | N/C                            | -                           | <b>N</b>                    |
| EAN87824.1        | -                         | cytoplasm                   |                         | nucleus_or_cytosol          | N / C                          | -                           | <b>C</b>                    |
| EAN83270.1        | ER / Golgi                | Golgi                       |                         | nucleus_or_cytosol          | EXTR                           | s                           | <b>SEC-ER-G</b>             |
| EAN82898.1        | -                         | PM                          |                         | nucleus_or_cytosol          | PM                             | -                           | <b>PM</b>                   |
| EAN86445.1        | -                         | Golgi                       |                         | nucleus_or_cytosol          | C/N                            | -                           |                             |
| EAN87937.1        | -                         | mitochondrion               |                         | mitochondria                | PM / EXTR / G                  | m                           | <b>M</b>                    |
| EAN89424.1        | -                         | mitochondrion               |                         | secretory_pathway           | C / EXTR                       | -                           |                             |
| EAN84629.1        | -                         | mitochondrion               |                         | mitochondria                | N / M                          | m                           | <b>M</b>                    |
| EAN90235.1        | mitochondrion             | mitochondrion               |                         | mitochondria                | C / M / N                      | m                           | <b>M</b>                    |
| EAN91922.1        | -                         | PM                          |                         | nucleus_or_cytosol          | PM                             | s                           | <b>PM</b>                   |
| EAN97577.1        | cytoplasm                 | cytoplasm                   |                         | nucleus_or_cytosol          | N                              | -                           | <b>C</b>                    |
| EAN82173.1        | -                         | Extrac/Secret               |                         | secretory_pathway           | EXTR                           | -                           | <b>SEC-EXT</b>              |
| EAN85405.1        | -                         | nucleus                     |                         | nucleus_or_cytosol          | N                              | m                           | <b>N</b>                    |
| EAN90473.1        | -                         | Golgi                       |                         | mitochondria                | M                              | m                           | <b>M</b>                    |
| EAN83261.1        | -                         | peroxysomes                 |                         | nucleus_or_cytosol          | EXTR                           | -                           |                             |
| EAN81197.1        | -                         | peroxysomes                 |                         | nucleus_or_cytosol          | EXTR                           | -                           |                             |
| EAN95832.1        | -                         | peroxysomes                 |                         | nucleus_or_cytosol          | EXTR                           | -                           |                             |
| EAN81873.1        | -                         | PM                          |                         | nucleus_or_cytosol          | N / C                          | -                           | <b>N-C</b>                  |

| PROTEIN ID | PENCE         | pTARGET       | PeroxiP | SPL-Loc            | WOLF pSORT    | TargetP  | FINAL PREDICTION |
|------------|---------------|---------------|---------|--------------------|---------------|----------|------------------|
|            | Location      | Location      | PTS1    | Location           | Location      | Location |                  |
| EAN95952.1 | -             | Golgi         |         | nucleus_or_cytosol | C / M / N     | m        |                  |
| EAN84522.1 | -             | nucleus       |         | nucleus_or_cytosol | M / ER        | m        | N                |
| EAN99627.1 | -             | cytoplasm     |         | nucleus_or_cytosol | PM            | -        |                  |
| EAN87577.1 | -             | nucleus       | x       | nucleus_or_cytosol | N             | -        | N                |
| EAN82896.1 | -             | mitochondrion |         | mitochondria       | M / P         | m        | M                |
| EAN99701.1 | -             | nucleus       |         | nucleus_or_cytosol | N/C           | m        | N                |
| EAN99763.1 | cytoplasm     | cytoplasm     |         | nucleus_or_cytosol | EXTR / C / N  | -        | C                |
| EAN94545.1 | nucleus       | nucleus       |         | nucleus_or_cytosol | C / N         | -        | N                |
| EAN91782.1 | cytop / ER    | ER            |         | secretory_pathway  | ER            | s        | SEC-ER           |
| EAN87428.1 | mitochondrion | Golgi         |         | nucleus_or_cytosol | C / N         | -        |                  |
| EAN85276.1 | -             | cytoplasm     |         | nucleus_or_cytosol | C / N         | -        | N-C              |
| EAN87301.1 | -             | peroxysomes   |         | nucleus_or_cytosol | C / N         | -        | N-C              |
| EAN93401.1 | mitochondrion | mitochondrion |         | nucleus_or_cytosol | M             | -        | M                |
| EAN85190.1 | cytoplasm     | nucleus       |         | nucleus_or_cytosol | N / C         | m        | N-C              |
| EAN87214.1 | -             | mitochondrion |         | mitochondria       | M             | m        | M                |
| EAN88258.1 | cytoplasm     | mitochondrion |         | nucleus_or_cytosol | C/N           | m        |                  |
| EAN98396.1 | -             | cytoplasm     |         | nucleus_or_cytosol | N / C         | -        | N-C              |
| EAN85108.1 | nucleus       | nucleus       |         | nucleus_or_cytosol | EXTR / C/N    | s        | N                |
| EAN94586.1 | -             | nucleus       |         | nucleus_or_cytosol | C/N           | -        | N-C              |
| EAN87063.1 | -             | nucleus       |         | nucleus_or_cytosol | C / N         | -        | N-C              |
| EAN82309.1 | -             | ER            |         | nucleus_or_cytosol | C             | -        |                  |
| EAN97099.1 | -             | peroxysomes   |         | nucleus_or_cytosol | PM            | -        |                  |
| EAN85329.1 | cytoplasm     | mitochondrion |         | secretory_pathway  | PM            | s        | SEC              |
| EAN88802.1 | cytoplasm     | cytoplasm     | xx      | nucleus_or_cytosol | C/N           | -        | C                |
| EAN94012.1 | -             | cytoplasm     |         | nucleus_or_cytosol | C/N           | -        | C                |
| EAN99952.1 | cytoplasm     | ER            |         | nucleus_or_cytosol | C / P         | -        | C                |
| EAN97551.1 | cytoplasm     | nucleus       |         | mitochondria       | N             | m        |                  |
| EAN92109.1 | nucleus       | peroxysomes   |         | secretory_pathway  | N / C         | -        |                  |
| EAN84988.1 | -             | mitochondrion |         | secretory_pathway  | N / M / EXTR  | -        | SEC              |
| EAN97019.1 | -             | Golgi         |         | nucleus_or_cytosol | C / N         | -        | N-C              |
| EAN86484.1 | -             | mitochondrion |         | mitochondria       | PM / EXTR / M | m        | M                |

| <b>PROTEIN ID</b> | <b>PENCE</b><br>Location | <b>pTARGET</b><br>Location | <b>PeroxiP</b><br>PTS1 | <b>SPL-Loc</b><br>Location | <b>WOLF pSORT</b><br>Location | <b>TargetP</b><br>Location | <b>FINAL</b><br><b>PREDICTION</b> |
|-------------------|--------------------------|----------------------------|------------------------|----------------------------|-------------------------------|----------------------------|-----------------------------------|
| EAN91740.1        | mitochondrion            | cytoplasm                  |                        | nucleus_or_cytosol         | C / M                         | -                          | <b>C</b>                          |
| EAN84095.1        | -                        | Golgi                      |                        | mitochondria               | N / EXTR                      | s                          |                                   |
| EAN95493.1        | -                        | nucleus                    |                        | nucleus_or_cytosol         | C / N                         | -                          | <b>N</b>                          |
| EAN89677.1        | PM                       | nucleus                    |                        | nucleus_or_cytosol         | N                             | m                          | <b>N</b>                          |
| EAN98716.1        | ER / extracellular       | nucleus                    |                        | nucleus_or_cytosol         | C/N                           | -                          | <b>N</b>                          |
| EAN97971.1        | cytoplasm                | nucleus                    |                        | nucleus_or_cytosol         | N                             | -                          | <b>N-C</b>                        |
| EAN81827.1        | -                        | cytoplasm                  |                        | nucleus_or_cytosol         | EXTR/ PM                      | -                          |                                   |
| EAN83529.1        | cytoplasm                | cytoplasm                  |                        | nucleus_or_cytosol         | C / N                         | -                          | <b>C</b>                          |
| EAN87488.1        | mitochondrion            | mitochondrion              |                        | nucleus_or_cytosol         | C / N / M                     | s                          |                                   |
| EAN88283.1        | -                        | Golgi                      |                        | nucleus_or_cytosol         | PM / EXTR / M                 | s                          |                                   |
| EAN84096.1        | -                        | Golgi                      |                        | secretory_pathway          | PM                            | s                          | <b>SEC</b>                        |
| EAN88063.1        | cytoplasm                | nucleus                    |                        | nucleus_or_cytosol         | N                             | m                          | <b>N</b>                          |
| EAN86150.1        | -                        | Golgi                      |                        | nucleus_or_cytosol         | M / C                         | -                          |                                   |
| EAN88162.1        | -                        | nucleus                    |                        | nucleus_or_cytosol         | C / N                         | -                          | <b>N-C</b>                        |
| EAN88387.1        | -                        | nucleus                    |                        | nucleus_or_cytosol         | C / N                         | -                          | <b>N-C</b>                        |
| EAN89593.1        | -                        | cytoplasm                  |                        | nucleus_or_cytosol         | N / C                         | -                          | <b>N-C</b>                        |
| EAN83022.1        | -                        | mitochondrion              |                        | secretory_pathway          | EXTR                          | -                          | <b>SEC</b>                        |
| EAN91430.1        | -                        | peroxysomes                |                        | nucleus_or_cytosol         | C / N                         | -                          | <b>N-C</b>                        |
| EAN99391.1        | -                        | Golgi                      |                        | secretory_pathway          | PM / M / C                    | s                          | <b>SEC</b>                        |
| EAN95438.1        | -                        | mitochondrion              |                        | nucleus_or_cytosol         | ER / M / PM                   | -                          |                                   |
| EAN97520.1        | -                        | ER                         |                        | nucleus_or_cytosol         | N / C                         | -                          | <b>N-C</b>                        |
| EAN85286.1        | cytoplasm                | mitochondrion              |                        | mitochondria               | M                             | m                          | <b>M</b>                          |
| EAN95451.1        | -                        | peroxysomes                |                        | nucleus_or_cytosol         | C/N/er/M                      | -                          |                                   |
| EAN81839.1        | cytoplasm                | Golgi                      | xx                     | nucleus_or_cytosol         | C / N                         | -                          | <b>C</b>                          |
| EAO00208.1        | -                        | nucleus                    |                        | nucleus_or_cytosol         | N                             | -                          | <b>N</b>                          |
| EAN99098.1        | nucleus                  | nucleus                    |                        | nucleus_or_cytosol         | N / C                         | -                          | <b>N</b>                          |
| EAO00215.1        | -                        | peroxysomes                | x                      | nucleus_or_cytosol         | PM / C / N                    | -                          |                                   |
| EAN81429.1        | -                        | PM                         |                        | nucleus_or_cytosol         | PM                            | -                          | <b>PM</b>                         |
| EAN93181.1        | -                        | ER                         |                        | secretory_pathway          | EXTR                          | s                          | <b>SEC-ER</b>                     |
| EAN91858.1        | cytoplasm                | cytoplasm                  |                        | nucleus_or_cytosol         | M / C                         | s                          | <b>C</b>                          |
| EAN86224.1        | -                        | Golgi                      |                        | secretory_pathway          | PM                            | s                          | <b>SEC</b>                        |



| <b>PROTEIN ID</b> | <b>PENCE</b><br>Location | <b>pTARGET</b><br>Location | <b>PeroxiP</b><br>PTS1 | <b>SPL-Loc</b><br>Location | <b>WOLF pSORT</b><br>Location | <b>TargetP</b><br>Location | <b>FINAL</b><br><b>PREDICTION</b> |
|-------------------|--------------------------|----------------------------|------------------------|----------------------------|-------------------------------|----------------------------|-----------------------------------|
| EAN85839.1        | cytoplasm                | nucleus                    |                        | mitochondria               | N                             | m                          |                                   |
| EAN86428.1        | ER                       | Golgi                      |                        | mitochondria               | PM / M / P                    | s                          |                                   |
| EAN92675.1        | -                        | mitochondrion              | xxxx                   | nucleus_or_cytosol         | M / C / N                     | m                          | <b>M</b>                          |
| EAN88187.1        | cytoplasm                | cytoplasm                  |                        | nucleus_or_cytosol         | CYTOSK                        | -                          | <b>C</b>                          |
| EAN96768.1        | -                        | Golgi                      |                        | secretory_pathway          | EXTR / LYSO                   | s                          | <b>SEC</b>                        |
| EAN94594.1        | ER                       | mitochondrion              | xxxx                   | nucleus_or_cytosol         | N / C                         | -                          |                                   |
| EAN94854.1        | cytoplasm                | nucleus                    |                        | nucleus_or_cytosol         | N                             | m                          | <b>N</b>                          |
| EAN96277.1        | mitochondrion            | mitochondrion              |                        | mitochondria               | M                             | m                          | <b>M</b>                          |
| EAN84157.1        | nucleus                  | PM                         |                        | nucleus_or_cytosol         | PM / N / C                    | -                          |                                   |
| EAN90288.1        | -                        | ER                         |                        | secretory_pathway          | EXTR                          | s                          | <b>SEC-ER</b>                     |
| EAN85669.1        | nucleus                  | nucleus                    |                        | nucleus_or_cytosol         | N/C                           | -                          | <b>N</b>                          |
| EAN95652.1        | cytop / Golgi            | peroxysomes                |                        | nucleus_or_cytosol         | C / P                         | -                          | <b>C-GLYC</b>                     |
| EAN83893.1        | cytop / Golgi / PM       | Golgi                      |                        | nucleus_or_cytosol         | C/N                           | s                          | <b>G</b>                          |
| EAN89707.1        | nucleus                  | nucleus                    |                        | secretory_pathway          | C / N                         | -                          | <b>N</b>                          |
| EAN94699.1        | cytoplasm                | cytoplasm                  |                        | nucleus_or_cytosol         | N / C                         | -                          | <b>N-C</b>                        |
| EAN91538.1        | cytoplasm                | nucleus                    |                        | nucleus_or_cytosol         | C / N                         | -                          | <b>N-C</b>                        |
| EAN82045.1        | nucleus                  | cytoplasm                  |                        | nucleus_or_cytosol         | C/N                           | -                          | <b>N-C</b>                        |
| EAN90017.1        | -                        | Golgi                      |                        | mitochondria               | M / C                         | m                          | <b>M</b>                          |
| EAN83327.1        | -                        | mitochondrion              |                        | secretory_pathway          | PM                            | s                          |                                   |
| EAN88441.1        | -                        | nucleus                    |                        | nucleus_or_cytosol         | N / M / C                     | m                          |                                   |
| EAN83132.1        | -                        | lysosomes                  |                        | mitochondria               | M                             | m                          | <b>M</b>                          |
| EAN83371.1        | -                        | ER                         |                        | secretory_pathway          | M/ EXTR                       | s                          | <b>SEC</b>                        |
| EAN91467.1        | -                        | peroxysomes                |                        | mitochondria               | M                             | m                          | <b>M</b>                          |
| EAN95114.1        | -                        | peroxysomes                |                        | nucleus_or_cytosol         | C/N                           | -                          |                                   |
| EAN94516.1        | cytoplasm                | nucleus                    |                        | nucleus_or_cytosol         | N/C                           | s                          | <b>N-C</b>                        |
| EAN82097.1        | -                        | Golgi                      |                        | nucleus_or_cytosol         | C / N                         | -                          | <b>N-C</b>                        |
| EAN97997.1        | -                        | Golgi                      |                        | nucleus_or_cytosol         | C / N                         | -                          | <b>N-C</b>                        |
| EAN93009.1        | -                        | mitochondrion              |                        | mitochondria               | M / C                         | m                          | <b>M</b>                          |
| EAN89189.1        | -                        | nucleus                    |                        | nucleus_or_cytosol         | EXTR                          | -                          | <b>N</b>                          |
| EAN90963.1        | -                        | lysosomes                  |                        | secretory_pathway          | PM                            | s                          | <b>SEC</b>                        |
| EAN98338.1        | nucleus                  | cytoplasm                  |                        | nucleus_or_cytosol         | N/C                           | m                          | <b>N-C</b>                        |

| PROTEIN ID | PENCE           | pTARGET       | PeroxiP | SPL-Loc            | WOLF pSORT  | TargetP  | FINAL PREDICTION |
|------------|-----------------|---------------|---------|--------------------|-------------|----------|------------------|
|            | Location        | Location      | PTS1    | Location           | Location    | Location |                  |
| EAN82295.1 | -               | PM            |         | nucleus_or_cytosol | EXTR / C/N  | -        |                  |
| EAN80998.1 | -               | nucleus       |         | nucleus_or_cytosol | C           | -        |                  |
| EAN81715.1 | -               | Golgi         |         | mitochondria       | N/C         | m        |                  |
| EAN99859.1 | -               | PM            |         | secretory_pathway  | EXTR        | s        | <b>SEC</b>       |
| EAN95112.1 | cytop / Golgi   | nucleus       |         | nucleus_or_cytosol | M           | -        |                  |
| EAN85221.1 | cytoplasm       | nucleus       |         | nucleus_or_cytosol | N / M / C   | m        | <b>N-C</b>       |
| EAN83235.1 | cytoplasm       | nucleus       |         | nucleus_or_cytosol | N           | -        | <b>N-C</b>       |
| EAN94132.1 | -               | Golgi         | x       | nucleus_or_cytosol | M           | m        |                  |
| EAN88008.1 | cytop / Golgi   | cytoplasm     |         | nucleus_or_cytosol | N/C         | -        | <b>C</b>         |
| EAN83367.1 | cytop / Golgi   | nucleus       | x       | nucleus_or_cytosol | N           | -        | <b>N</b>         |
| EAN89431.1 | cytoplasm       | cytoplasm     |         | nucleus_or_cytosol | N           | -        | <b>C</b>         |
| EAN89518.1 | cytoplasm       | nucleus       |         | nucleus_or_cytosol | C / N       | -        | <b>N-C</b>       |
| EAN84397.1 | -               | peroxysomes   |         | nucleus_or_cytosol | C/N         | -        |                  |
| EAN81302.1 | -               | mitochondrion |         | mitochondria       | M           | m        | <b>M</b>         |
| EAN84897.1 | cytoplasm       | Golgi         |         | secretory_pathway  | ER / PM / C | s        | <b>SEC</b>       |
| EAN85214.1 | nucleus         | mitochondrion |         | mitochondria       | M / N       | m        | <b>M</b>         |
| EAN95668.1 | cytop / nucleus | mitochondrion |         | nucleus_or_cytosol | N / C       | -        | <b>N-C</b>       |
| EAN87575.1 | mitochondrion   | nucleus       |         | mitochondria       | C / M       | m        | <b>M</b>         |
| EAN94531.1 | ER              | mitochondrion | xx      | nucleus_or_cytosol | M / C / N   | -        |                  |

| SUMMARY   |         |                   |         |           |         |          |         |
|-----------|---------|-------------------|---------|-----------|---------|----------|---------|
| LOCATION  | TOTAL # | LOCATION          | TOTAL # | LOCATION  | TOTAL # | LOCATION | TOTAL # |
| Undefined | 36      | Cytoplasm         | 13      | PM        | 3       | Cyt-Glyc | 1       |
| N-C       | 26      | Mitochondrion     | 20      | Glycosome | 1       | N-M      | 1       |
| Nucleus   | 20      | Secretory Pathway | 17      |           |         |          |         |

**TABLE S8C: PROTEIN BLAST & COMPARATIVE EXPRESSION DATA**

Numbers in brackets beside the accession numbers, indicate (1) no expression data found previously in whole cellular Tcruzi proteome and (2) no expression data found previously in epimastigote stage from whole cell proteomic analysis (Atwood et al, 2005). In light background are shown those hits with other Tryp proteins with ID.

| PROTEIN ID     | BLASTP RESULTS (310108)                                                                                                                                                                                                                                                                                                                                             |                                                                                                 |
|----------------|---------------------------------------------------------------------------------------------------------------------------------------------------------------------------------------------------------------------------------------------------------------------------------------------------------------------------------------------------------------------|-------------------------------------------------------------------------------------------------|
|                | Sequences with E-value BETTER than threshold                                                                                                                                                                                                                                                                                                                        | Sequences with E-value WORSE than threshold                                                     |
| EAN90233.1 (2) | Hypothetical proteins Tryps                                                                                                                                                                                                                                                                                                                                         | ref ZP_01041026.1  putative peptidase precursor [Erythrobacter sp. NAP1]                        |
| EAN92211.1     | Hypothetical proteins Tryps                                                                                                                                                                                                                                                                                                                                         | ref ZP_02122410.1  peptide chain release factor 2 protein [Methylobacterium nodulans ORS 2060]  |
| EAN85296.1 (1) | Hypothetical proteins Tryps                                                                                                                                                                                                                                                                                                                                         |                                                                                                 |
| EAN94958.1     | Hypothetical proteins Tryps                                                                                                                                                                                                                                                                                                                                         | ref YP_001428058.1  dTDP-glucose 4,6-dehydratase [Francisella tularensis subsp. holarctica FTA] |
| EAN99605.1 (2) | Hypothetical proteins Tryps plus over 50 hits hypothetical proteins from other species                                                                                                                                                                                                                                                                              | Hypothetical proteins from other species                                                        |
| EAN87059.1     | Hypothetical protein only in Tcruzi                                                                                                                                                                                                                                                                                                                                 | dbj BAA22067.1  myosin heavy chain [Cyprinus carpio]                                            |
| EAN89163.1 (1) | Hypothetical proteins Tryps                                                                                                                                                                                                                                                                                                                                         |                                                                                                 |
| EAN82199.1 (1) | Hypothetical proteins Tryps plus over 100 hits. Best ones other species gb ABM55602.1  putative signal sequence receptor beta subunit [Maconellicoccus hirsutus] orref YP_001274107.1  adhesin-like protein [Methanobrevibacter smithii ATCC 35061].                                                                                                                |                                                                                                 |
| EAN99158.1     | Hypothetical protein only in Tcruzi and Tbrucei                                                                                                                                                                                                                                                                                                                     |                                                                                                 |
| EAN87824.1     | Hypothetical proteins Tryps plus best next hits ref ZP_00994854.1  amidinotransferase family protein [Janibacter sp. TCC2649] /// ref ZP_01130782.1  Amidinotransferase [marine actinobacterium PHSC20C1]                                                                                                                                                           |                                                                                                 |
| EAN83270.1 (2) | Hypothetical proteins Tryps plus ref XP_001354671.1  GA17526-PA [Drosophila pseudoobscura] = emp24/gp25L/p24 family/GOLD. Members of this family are implicated in bringing cargo forward from the ER and binding to coat proteins by their cytoplasmic domains. /// ref XP_566482.1  COPII-coated vesicle protein [Cryptococcus neoformans var. neoformans JEC21]. |                                                                                                 |
| EAN82898.1 (1) | Hypothetical proteins Tryps plus over 50 hits hypothetical proteins from other species                                                                                                                                                                                                                                                                              |                                                                                                 |
| EAN86445.1     | Hypothetical proteins Tryps                                                                                                                                                                                                                                                                                                                                         | Hypothetical proteins or unrelated products from other species                                  |
| EAN87937.1 (1) | Hypothetical proteins Tryps plus hits hypothetical proteins from other species                                                                                                                                                                                                                                                                                      |                                                                                                 |
| EAN89424.1     | Hypothetical proteins Tryps                                                                                                                                                                                                                                                                                                                                         | Hypothetical proteins or unrelated products from other species                                  |
| EAN84629.1     | Hypothetical protein only in Tcruzi and Tbrucei                                                                                                                                                                                                                                                                                                                     |                                                                                                 |
| EAN90235.1     | Hypothetical proteins Tryps plus next best hit: sp O01369.2 QCR7_FASHE Cytochrome b-c1 complex subunit 7 (Ubiquinol-cytochrome c reductase complex 14 kDa protein) (Complex III subunit 7) (Complex III subunit VII) [Fasciola hepatica] and similar others.                                                                                                        |                                                                                                 |
| EAN91922.1     | Hypothetical proteins Tryps                                                                                                                                                                                                                                                                                                                                         | Hypothetical proteins or unrelated products from other species                                  |
| EAN97577.1     | Hypothetical proteins Tryps                                                                                                                                                                                                                                                                                                                                         |                                                                                                 |
| EAN82173.1     | Hypothetical proteins Tryps                                                                                                                                                                                                                                                                                                                                         |                                                                                                 |
| EAN85405.1     | Hypothetical proteins Tryps plus hits hypothetical proteins from other species                                                                                                                                                                                                                                                                                      |                                                                                                 |
| EAN90473.1     | Hypothetical proteins Tryps                                                                                                                                                                                                                                                                                                                                         | ref XP_001689789.1  mitochondrial ribosomal protein L20 [Chlamydomonas reinhardtii]             |

| PROTEIN ID     | BLASTP RESULTS (310108)                                                                                                                                                                                                                                                                              |                                                                |
|----------------|------------------------------------------------------------------------------------------------------------------------------------------------------------------------------------------------------------------------------------------------------------------------------------------------------|----------------------------------------------------------------|
|                | Sequences with E-value BETTER than threshold                                                                                                                                                                                                                                                         | Sequences with E-value WORSE than threshold                    |
| EAN83261.1     | Hypothetical proteins Tryps                                                                                                                                                                                                                                                                          | Hypothetical proteins or unrelated products from other species |
| EAN81197.1     | Hypothetical proteins Tryps                                                                                                                                                                                                                                                                          | Various unrelated proteins from other species.                 |
| EAN95832.1     | Hypothetical proteins Tryps                                                                                                                                                                                                                                                                          | Various unrelated proteins from other species.                 |
| EAN81873.1     | Hypothetical proteins Tryps                                                                                                                                                                                                                                                                          | Various unrelated proteins from other species.                 |
| EAN95952.1     | Hypothetical proteins Tryps plus next best hits several amidinotransferases: ref YP_923220.1  amidinotransferase family protein [Nocardioides sp. JS614] plus other hypothetical products.                                                                                                           |                                                                |
| EAN84522.1 (1) | Hypothetical proteins Tryps plus hits hypothetical or unrelated proteins from other species                                                                                                                                                                                                          |                                                                |
| EAN99627.1 (1) | Hypothetical protein only in Tcruzi and Tbrucei                                                                                                                                                                                                                                                      | Various unrelated proteins from other species.                 |
| EAN87577.1 (1) | Hypothetical protein only in Tcruzi and Leishmania sp.                                                                                                                                                                                                                                               |                                                                |
| EAN82896.1 (1) | Hypothetical protein only in Tcruzi and Leishmania sp plus several other hypothetical and unrelated proteins from other species: ref YP_001175645.1  thioesterase superfamily protein [Enterobacter sp. 638]                                                                                         |                                                                |
| EAN99701.1 (2) | Hypothetical proteins Tryps plus hits hypothetical proteins from other species                                                                                                                                                                                                                       |                                                                |
| EAN99763.1 (2) | Hypothetical proteins Tryps plus several similar hits: gb ABC02026.1  radial spoke protein 7 [Chlamydomonas reinhardtii]/// ref NP_060048.2  ropporin [Homo sapiens]. These proteins are flagellar/axoneme related, calcium binding and kinase activity related.                                     |                                                                |
| EAN94545.1     | Hypothetical proteins Tryps plus hits hypothetical or unrelated proteins from other species                                                                                                                                                                                                          |                                                                |
| EAN91782.1 (2) | Hypothetical proteins Tryps plus hits hypothetical or unrelated proteins from other species. Best next hit: emb CAL52554.1  17 beta-hydroxysteroid dehydrogenase type 3, HSD17B3 (ISS) [Ostreococcus tauri]                                                                                          |                                                                |
| EAN87428.1 (1) | Hypothetical proteins Tryps plus hits hypothetical or unrelated proteins from other species. Best next hit:ref YP_001516929.1  glutathione S-transferase, putative [Acaryochloris marina MBIC11017] /// gb AAD03559.1  failed axon connections protein [Drosophila virilis]                          |                                                                |
| EAN85276.1     | Hypothetical proteins from Tcruzi and Leishmania sp plus hits hypothetical or unrelated proteins from other species                                                                                                                                                                                  |                                                                |
| EAN87301.1 (1) | Hypothetical proteins Tryps plus hits of immunoglobulins from other species: gb AAT65112.1  immunoglobulin E variable region [Homo sapiens]                                                                                                                                                          |                                                                |
| EAN93401.1 (1) | Hypothetical proteins Tryps plus several species similar hits: ref NP_001090497.1  solute carrier family 25 (mitochondrial carrier; oxoglutarate carrier), member 11 [Xenopus laevis]                                                                                                                |                                                                |
| EAN85190.1     | Hypothetical proteins Tryps                                                                                                                                                                                                                                                                          |                                                                |
| EAN87214.1 (2) | Hypothetical proteins Tryps plus hits hypothetical or unrelated proteins from other species                                                                                                                                                                                                          |                                                                |
| EAN88258.1 (1) | Hypothetical proteins Tryps plus several species similar hits: ref YP_001002431.1  ribosomal protein L22 [Halorhodospira halophila SL1]                                                                                                                                                              |                                                                |
| EAN98396.1 (1) | Hypothetical proteins Tryps plus hits hypothetical or unrelated proteins from other species                                                                                                                                                                                                          |                                                                |
| EAN85108.1 (1) | Hypothetical protein in Tcruzi but ref XP_845651.1  ribosome biogenesis protein, putative [Trypanosoma brucei TREU927] /// ref XP_001562230.1  brix domain containing-like protein [Leishmania braziliensis MHOM/BR/75/M2904] /// ref NP_075812.3  brix domain containing 1 isoform 1 [Mus musculus] |                                                                |
| EAN94586.1     | Hypothetical proteins Tryps plus hits hypothetical or unrelated proteins from other species                                                                                                                                                                                                          |                                                                |
| EAN87063.1     | Hypothetical proteins Tryps                                                                                                                                                                                                                                                                          |                                                                |

| PROTEIN ID     | BLASTP RESULTS (310108)                                                                                                                                                                                                                                                                                               |                                             |
|----------------|-----------------------------------------------------------------------------------------------------------------------------------------------------------------------------------------------------------------------------------------------------------------------------------------------------------------------|---------------------------------------------|
|                | Sequences with E-value BETTER than threshold                                                                                                                                                                                                                                                                          | Sequences with E-value WORSE than threshold |
| EAN82309.1     | Hypothetical proteins Tryps plus several species similar hits: gb AAF72105.1 AF154847_1 33 kDa Vamp-(vesicle-associated membrane protein)-associated protein [Homo sapiens]                                                                                                                                           |                                             |
| EAN97099.1 (1) | Hypothetical proteins Tryps plus hits hypothetical or unrelated proteins from other species                                                                                                                                                                                                                           |                                             |
| EAN85329.1 (1) | Hypothetical proteins Tryps plus hits hypothetical or unrelated proteins from other species                                                                                                                                                                                                                           |                                             |
| EAN88802.1 (2) | Hypothetical proteins Tryps plus hits hypothetical or unrelated proteins from other species                                                                                                                                                                                                                           |                                             |
| EAN94012.1 (1) | Hypothetical proteins Tryps plus hits hypothetical or unrelated proteins from other species                                                                                                                                                                                                                           |                                             |
| EAN99952.1     | Hypothetical proteins Tryps plus hits from other species aminotransferases: ref YP_001311379.1  aminotransferase, class IV [Clostridium beijerinckii NCIMB 8052]                                                                                                                                                      |                                             |
| EAN97551.1     | Hypothetical proteins Tryps                                                                                                                                                                                                                                                                                           |                                             |
| EAN92109.1 (2) | Hypothetical proteins Tryps plus hits hypothetical or unrelated proteins from other species                                                                                                                                                                                                                           |                                             |
| EAN84988.1     | Hypothetical proteins Tryps plus hits hypothetical proteins from other species plus several Saccharopine dehydrogenase: ref YP_958739.1  Saccharopine dehydrogenase [Marinobacter aquaeolei VT8]. Lysine metabolism.                                                                                                  |                                             |
| EAN97019.1     | Hypothetical proteins Tryps plus hits hypothetical or unrelated proteins from other species                                                                                                                                                                                                                           |                                             |
| EAN86484.1     | Hypothetical proteins Tryps                                                                                                                                                                                                                                                                                           |                                             |
| EAN91740.1 (2) | Hypothetical proteins Tryps plus hits hypothetical or unrelated proteins from other species                                                                                                                                                                                                                           |                                             |
| EAN84095.1 (1) | Hypothetical proteins Tryps plus hits of ref XP_812721.1  D-alanyl-glycyl endopeptidase-like protein, putative [Trypanosoma cruzi strain CL Brener]; also from Tbrucei and Leishmania, among other proteins of other species.                                                                                         |                                             |
| EAN95493.1 (1) | Hypothetical proteins Tryps plus hits hypothetical or unrelated proteins from other species                                                                                                                                                                                                                           |                                             |
| EAN89677.1 (1) | Hypothetical protein only in Tcruzi and Tbrucei                                                                                                                                                                                                                                                                       |                                             |
| EAN98716.1 (1) | Hypothetical proteins Tryps                                                                                                                                                                                                                                                                                           |                                             |
| EAN97971.1 (1) | Hypothetical proteins Tryps plus hits hypothetical or unrelated proteins from other species                                                                                                                                                                                                                           |                                             |
| EAN81827.1 (1) | Hypothetical proteins Tryps plus hits hypothetical proteins from other species and several like this: ref YP_725824.1  Glutathione S-transferase-like protein [Ralstonia eutropha H16]                                                                                                                                |                                             |
| EAN83529.1     | Hypothetical proteins Tryps plus hits hypothetical proteins from other species and several like this: ref XP_817487.1  mitotubule-associated protein Gb4, putative [Trypanosoma cruzi strain CL Brener] and ref XP_804415.1  dynein heavy chain, cytosolic [Trypanosoma cruzi strain CL Brener] Lower expected value. |                                             |
| EAN87488.1 (1) | Hypothetical proteins Tryps plus hits hypothetical or unrelated proteins from other species                                                                                                                                                                                                                           |                                             |
| EAN88283.1     | A few like this: sp Q41594 TASY_TAXBR Taxadiene synthase (Taxa-4(5),11(12)-diene synthase). Diterpenoid biosynthesis.                                                                                                                                                                                                 |                                             |
| EAN84096.1 (1) | Hypothetical proteins Tryps plus hits of ref XP_812721.1  D-alanyl-glycyl endopeptidase-like protein, putative [Trypanosoma cruzi strain CL Brener]; also from Tbrucei and Leishmania, among other proteins of other species.                                                                                         |                                             |
| EAN88063.1     | Hypothetical proteins Tryps plus hits hypothetical or unrelated proteins from other species                                                                                                                                                                                                                           |                                             |

| PROTEIN ID     | BLASTP RESULTS (310108)                                                                                                                                                                                                                                                                                                                                                                                                     |                                                                                                                                                                                                                                       |
|----------------|-----------------------------------------------------------------------------------------------------------------------------------------------------------------------------------------------------------------------------------------------------------------------------------------------------------------------------------------------------------------------------------------------------------------------------|---------------------------------------------------------------------------------------------------------------------------------------------------------------------------------------------------------------------------------------|
|                | Sequences with E-value BETTER than threshold                                                                                                                                                                                                                                                                                                                                                                                | Sequences with E-value WORSE than threshold                                                                                                                                                                                           |
| EAN86150.1 (2) | Hypothetical proteins Tryps                                                                                                                                                                                                                                                                                                                                                                                                 | A few like this: ref YP_001502637.1  methylmalonate-semialdehyde dehydrogenase [Shewanella pealeana ATCC 00345]. Participates in 3 metabolisms: inositol metabolism, valine-leucine-isoleucine degradation and propanoate metabolism. |
| EAN88162.1 (2) | Hypothetical proteins Tryps plus hits hypothetical or unrelated proteins from other species                                                                                                                                                                                                                                                                                                                                 |                                                                                                                                                                                                                                       |
| EAN88387.1     | Hypothetical proteins Tryps plus hits hypothetical or unrelated proteins from other species                                                                                                                                                                                                                                                                                                                                 |                                                                                                                                                                                                                                       |
| EAN89593.1     | Hypothetical proteins Tryps plus hits hypothetical or unrelated proteins from other species                                                                                                                                                                                                                                                                                                                                 |                                                                                                                                                                                                                                       |
| EAN83022.1     | Hypothetical proteins Tryps plus hits hypothetical proteins from other species plus several Saccharopine dehydrogenase: ref YP_958739.1  Saccharopine dehydrogenase [Marinobacter aquaeolei VT8]. Lysine metabolism.                                                                                                                                                                                                        |                                                                                                                                                                                                                                       |
| EAN91430.1 (1) | Hypothetical proteins Tryps plus hits hypothetical or unrelated proteins from other species                                                                                                                                                                                                                                                                                                                                 |                                                                                                                                                                                                                                       |
| EAN99391.1 (2) | Hypothetical proteins Tryps plus hits hypothetical or unrelated proteins from other species                                                                                                                                                                                                                                                                                                                                 |                                                                                                                                                                                                                                       |
| EAN95438.1 (1) | Hypothetical proteins Tryps plus hits hypothetical proteins from other species plus several cinnamyl-alcohol dehydrogenase: ref ZP_00592614.1  cinnamyl-alcohol dehydrogenase (CAD), putative [Prosthecochloris aestuarii DSM 271]. Phenylpropanoid biosynthesis. Oxidoreductase family.                                                                                                                                    |                                                                                                                                                                                                                                       |
| EAN97520.1 (1) | Hypothetical proteins Tryps plus hits hypothetical or unrelated proteins from other species                                                                                                                                                                                                                                                                                                                                 |                                                                                                                                                                                                                                       |
| EAN85286.1 (1) | Hypothetical proteins Tryps plus hits hypothetical or unrelated proteins from other species                                                                                                                                                                                                                                                                                                                                 |                                                                                                                                                                                                                                       |
| EAN95451.1 (2) | Hypothetical proteins Tryps plus hits hypothetical or unrelated proteins from other species                                                                                                                                                                                                                                                                                                                                 |                                                                                                                                                                                                                                       |
| EAN81839.1     | Hypothetical protein only in Tcruzi. Then over 40 hits to Glycerate kinases from different species.                                                                                                                                                                                                                                                                                                                         |                                                                                                                                                                                                                                       |
| EAO00208.1     | Hypothetical proteins Tryps                                                                                                                                                                                                                                                                                                                                                                                                 |                                                                                                                                                                                                                                       |
| EAN99098.1 (1) | Hypothetical proteins Tryps plus over 30 hits like this: ref NP_491688.1  HMG family member (hmg-3) [Caenorhabditis elegans] sp O01683.1 SSP1B_CAEEEL FACT complex subunit ssrp1-B (Facilitates chromatin transcription complex subunit ssrp1-B) (Structure-specific recognition protein 1-B) (HMG box-containing protein 3) - Interacts with histones H2A/B to effect nucleosome disassembly and transcription elongation. |                                                                                                                                                                                                                                       |
| EAO00215.1 (1) | Hypothetical proteins Tryps plus hits hypothetical or unrelated proteins from other species                                                                                                                                                                                                                                                                                                                                 |                                                                                                                                                                                                                                       |
| EAN81429.1     | Hypothetical proteins Tryps - 50 hits. Several copies in all three Tryps.                                                                                                                                                                                                                                                                                                                                                   |                                                                                                                                                                                                                                       |
| EAN93181.1 (1) | Hypothetical proteins Tryps plus hits hypothetical or unrelated proteins from other species                                                                                                                                                                                                                                                                                                                                 |                                                                                                                                                                                                                                       |
| EAN91858.1 (1) | Hypothetical proteins Tcruzi and Lm, but ref XP_845863.1  tyrosyl-tRNA synthetase, putative [Trypanosoma brucei TREU927]. Plus other species hypothetical or unrelated proteins.                                                                                                                                                                                                                                            |                                                                                                                                                                                                                                       |
| EAN86224.1 (1) | Hypothetical proteins Tryps plus hits hypothetical or unrelated proteins from other species                                                                                                                                                                                                                                                                                                                                 |                                                                                                                                                                                                                                       |
| EAN85839.1     | Hypothetical proteins Tryps                                                                                                                                                                                                                                                                                                                                                                                                 |                                                                                                                                                                                                                                       |
| EAN86428.1 (1) | Hypothetical proteins Tcruzi and Lm, but ref XP_827602.1  short-chain dehydrogenase [Trypanosoma brucei TREU927]. Plus other species hypothetical or short-chain dh proteins.                                                                                                                                                                                                                                               |                                                                                                                                                                                                                                       |
| EAN92675.1 (1) | Hypothetical proteins Tryps plus hits hypothetical or unrelated proteins from other species                                                                                                                                                                                                                                                                                                                                 |                                                                                                                                                                                                                                       |
| EAN88187.1 (1) | Hypothetical proteins Tryps plus hits hypothetical or unrelated proteins from other species                                                                                                                                                                                                                                                                                                                                 |                                                                                                                                                                                                                                       |
| EAN96768.1 (1) | Hypothetical proteins Tryps plus hits hypothetical or unrelated proteins from other species                                                                                                                                                                                                                                                                                                                                 |                                                                                                                                                                                                                                       |

| PROTEIN ID     | BLASTP RESULTS (310108)                                                                                                                                                                                                                                                       |                                                                |
|----------------|-------------------------------------------------------------------------------------------------------------------------------------------------------------------------------------------------------------------------------------------------------------------------------|----------------------------------------------------------------|
|                | Sequences with E-value BETTER than threshold                                                                                                                                                                                                                                  | Sequences with E-value WORSE than threshold                    |
| EAN94594.1 (1) | Hypothetical proteins Tcruzi and Tbrucei, but ref XP_001464804.1  L-gulonolactone oxidase, putative [Leishmania infantum JPCM5] and other species hypothetical or L-gulonolactone oxidase proteins.                                                                           |                                                                |
| EAN94854.1 (1) | Hypothetical proteins Tryps                                                                                                                                                                                                                                                   |                                                                |
| EAN96277.1 (1) | Hypothetical proteins Tryps plus hits hypothetical or unrelated proteins from other species                                                                                                                                                                                   |                                                                |
| EAN84157.1 (1) | Hypothetical proteins Tcruzi and Tbrucei plus hits hypothetical or unrelated proteins from other species, but gb AAQ10955.1  putative splicing factor XB2 [Trypanosoma cruzi] and ref XP_848208.1  WD-repeat protein [Leishmania major strain Friedlin]                       |                                                                |
| EAN90288.1 (1) | Hypothetical proteins Tryps plus hits hypothetical or unrelated proteins from other species                                                                                                                                                                                   |                                                                |
| EAN85669.1 (1) | Hypothetical proteins Tryps plus hits hypothetical or unrelated proteins from other species                                                                                                                                                                                   |                                                                |
| EAN95652.1     | Hypothetical proteins Tryps plus hits hypothetical or unrelated proteins from other species, but ref XP_808187.1  myosin heavy chain, putative [Trypanosoma cruzi strain CL Brener] and ref XP_001687712.1  kinesin K39, putative [Leishmania major]                          |                                                                |
| EAN83893.1 (1) | Hypothetical proteins Tryps plus hits hypothetical or unrelated proteins from other species                                                                                                                                                                                   |                                                                |
| EAN89707.1 (1) | Hypothetical proteins Tryps plus hits hypothetical or unrelated proteins from other species                                                                                                                                                                                   |                                                                |
| EAN94699.1 (1) | Hypothetical proteins Tryps plus hits hypothetical or unrelated proteins from other species                                                                                                                                                                                   |                                                                |
| EAN91538.1     | Hypothetical proteins Tryps plus hits hypothetical or unrelated proteins from other species, but ref XP_808187.1  myosin heavy chain, putative [Trypanosoma cruzi strain CL Brener] and ref XP_001687712.1  kinesin K39, putative [Leishmania major]                          |                                                                |
| EAN82045.1 (1) | Hypothetical proteins Tryps plus hits hypothetical or unrelated proteins from other species                                                                                                                                                                                   |                                                                |
| EAN90017.1 (1) | Hypothetical proteins Tryps plus hits hypothetical or unrelated proteins from other species                                                                                                                                                                                   |                                                                |
| EAN83327.1 (1) | Hypothetical proteins Tryps                                                                                                                                                                                                                                                   | Hypothetical proteins from other species                       |
| EAN88441.1 (1) | Hypothetical protein only in Tcruzi and Tbrucei                                                                                                                                                                                                                               | Hypothetical proteins or unrelated products from other species |
| EAN83132.1 (2) | Hypothetical proteins Tryps                                                                                                                                                                                                                                                   |                                                                |
| EAN83371.1 (1) | Hypothetical proteins Tryps                                                                                                                                                                                                                                                   | Hypothetical proteins or unrelated products from other species |
| EAN91467.1     | Hypothetical proteins Tryps                                                                                                                                                                                                                                                   |                                                                |
| EAN95114.1 (1) | Hypothetical proteins Tryps plus hits hypothetical or unrelated proteins from other species                                                                                                                                                                                   |                                                                |
| EAN94516.1 (1) | Hypothetical proteins Tryps, but ref XP_001563398.1  kinesin K39, putative [Leishmania braziliensis MHOM/BR/75/M2904]                                                                                                                                                         |                                                                |
| EAN82097.1     | Hypothetical proteins Tryps                                                                                                                                                                                                                                                   |                                                                |
| EAN97997.1     | Hypothetical proteins Tryps                                                                                                                                                                                                                                                   | Hypothetical proteins or unrelated products from other species |
| EAN93009.1 (2) | Hypothetical proteins Tryps                                                                                                                                                                                                                                                   |                                                                |
| EAN89189.1 (1) | Hypothetical proteins Tryps                                                                                                                                                                                                                                                   | Only 2 unrelated products from other species                   |
| EAN90963.1 (1) | Hypothetical protein only in Tcruzi and Tbrucei plus hits of other species hypothetical proteins and several like this: ref NP_974419.1  nicastrin-related [Arabidopsis thaliana]. Part of the gamma-secretase complex; proteases involved in the processing of amyloid beta. |                                                                |
| EAN98338.1 (1) | Hypothetical proteins Tryps plus hits hypothetical or unrelated proteins from other species                                                                                                                                                                                   |                                                                |
| EAN82295.1     | Hypothetical proteins Tryps                                                                                                                                                                                                                                                   |                                                                |
| EAN80998.1     | Hypothetical proteins Tryps                                                                                                                                                                                                                                                   | Hypothetical proteins or unrelated products from other species |

| PROTEIN ID     | BLASTP RESULTS (310108)                                                                                                                                                                          |                                                                                                     |
|----------------|--------------------------------------------------------------------------------------------------------------------------------------------------------------------------------------------------|-----------------------------------------------------------------------------------------------------|
|                | Sequences with E-value BETTER than threshold                                                                                                                                                     | Sequences with E-value WORSE than threshold                                                         |
| EAN81715.1 (1) | Hypothetical proteins Tryps                                                                                                                                                                      | Hypothetical proteins or unrelated products from other species                                      |
| EAN99859.1 (1) | Hypothetical proteins only in Tcruzi but also ref XP_812770.1  surface protease GP63, putative [Trypanosoma cruzi strain CL Brener]                                                              |                                                                                                     |
| EAN95112.1     | Hypothetical proteins Tryps but also ref XP_001463596.1  paraflagellar rod component, putative [Leishmania infantum JPCM5] and gb AAQ55490.1  paraflagellar rod protein 1 [Trypanosoma brucei]   |                                                                                                     |
| EAN85221.1 (1) | Only two hypothetical proteins in Tcruzi.                                                                                                                                                        |                                                                                                     |
| EAN83235.1     | Hypothetical proteins Tryps plus hits hypothetical or unrelated proteins from other species                                                                                                      |                                                                                                     |
| EAN94132.1 (1) | Hypothetical proteins in Tcruzi and Lm but ref XP_829621.1  NUDIX hydrolase [Trypanosoma brucei TREU927] plus other hydrolases from other species.                                               |                                                                                                     |
| EAN88008.1 (1) | Hypothetical proteins Tryps                                                                                                                                                                      |                                                                                                     |
| EAN83367.1 (1) | Hypothetical proteins Tryps                                                                                                                                                                      | Hypothetical proteins or unrelated products from other species                                      |
| EAN89431.1     | Hypothetical proteins Tryps                                                                                                                                                                      |                                                                                                     |
| EAN89518.1 (1) | Hypothetical proteins Tryps plus hits hypothetical or unrelated proteins from other species                                                                                                      |                                                                                                     |
| EAN84397.1     | Hypothetical proteins Tryps, but ref XP_812111.1  calpain-like cysteine peptidase, putative [Trypanosoma cruzi strain CL Brener] plus hits hypothetical or unrelated proteins from other species |                                                                                                     |
| EAN81302.1 (1) | Hypothetical proteins Tryps                                                                                                                                                                      |                                                                                                     |
| EAN84897.1 (1) | Only one copy from Tcruzi, hypothetical plus two more hits like this: gb AAK19244.1 AF312916_1 reticulocyte binding protein 2 homolog A [Plasmodium falciparum]                                  |                                                                                                     |
| EAN85214.1     | Hypothetical protein only in Tcruzi.                                                                                                                                                             | Five hits from other species, similar to this: dbj BAA22067.1  myosin heavy chain [Cyprinus carpio] |
| EAN95668.1 (1) | Hypothetical protein only in Tcruzi and Tbrucei                                                                                                                                                  |                                                                                                     |
| EAN87575.1 (1) | Hypothetical proteins Tryps plus hits hypothetical or unrelated proteins from other species                                                                                                      |                                                                                                     |
| EAN94531.1 (1) | Hypothetical protein only in Tcruzi and Tbrucei but : ref XP_001464804.1  L-gulonolactone oxidase, putative Leishmania infantum JPCM5] plus same in other species.                               |                                                                                                     |
